# Supplementary material for: Evaluation and calibration of a Field Portable X-Ray Fluorescence spectrometer for quantitative analysis of siliciclastic soils and sediments
Source: Royal Society of Chemistry journal article supplement (doi:10.1039/c0ja00133c), 2010-11-24
Supplement: c0ja00133c-i.pdf [file c0ja00133c-i.pdf]

**Appendix I. The FP-XRF response (adjusted cps) for daily runs conducted between 28 January 2008 and 14 November 2008 along with corresponding SRM concentration information.**

| Analysis Date | SRM       | Element <sup>A</sup> | FP-XRF                    |             | Standard reference material information |                   | flag <sup>C</sup> |
|---------------|-----------|----------------------|---------------------------|-------------|-----------------------------------------|-------------------|-------------------|
|               |           |                      | signal (cps) <sup>B</sup> | uncertainty | concentration (ppm)                     | uncertainty (ppm) |                   |
| 1/28/2008     | BCSS-1    | S-LEAP               | 0.0050                    | 0.0016      | 3600                                    | 500               | 2                 |
| 1/28/2008     | MESS-1    | S-LEAP               | 0.0048                    | 0.0015      | 7200                                    | 500               | 2                 |
| 1/28/2008     | SDO-1     | S-LEAP               | 0.0380                    | 0.0026      | 53500                                   | 4400              | 2                 |
| 1/28/2008     | BCSS-1    | Cl-LEAP              | 0.0405                    | 0.0025      | 11200                                   | 500               | 2                 |
| 1/28/2008     | MESS-1    | Cl-LEAP              | 0.0376                    | 0.0024      | 8200                                    | 700               | 2                 |
| 1/28/2008     | MAG-1     | Cl-LEAP              | 0.1010                    | 0.0036      | 31000                                   | 600               | 2                 |
| 1/28/2008     | BCSS-1    | K-LEAP               | 0.2917                    | 0.0047      | 18014                                   | 332               | 2                 |
| 1/28/2008     | MESS-1    | K-LEAP               | 0.2938                    | 0.0048      | 18595                                   | 332               | 2                 |
| 1/28/2008     | NIST-2704 | K-LEAP               | 0.3848                    | 0.0060      | 20000                                   | 400               | 2                 |
| 1/28/2008     | NIST-2709 | K-LEAP               | 0.3186                    | 0.0052      | 20300                                   | 600               | 2                 |
| 1/28/2008     | NIST-2710 | K-LEAP               | 0.3859                    | 0.0063      | 21100                                   | 1100              | 2                 |
| 1/28/2008     | NIST-2711 | K-LEAP               | 0.4075                    | 0.0059      | 24500                                   | 800               | 2                 |
| 1/28/2008     | MAG-1     | K-LEAP               | 0.5328                    | 0.0074      | 29470                                   | 1411              | 2                 |
| 1/28/2008     | SCO-1     | K-LEAP               | 0.3823                    | 0.0058      | 22995                                   | 664               | 2                 |
| 1/28/2008     | SDO-1     | K-LEAP               | 0.5348                    | 0.0076      | 27810                                   | 506               | 2                 |
| 1/28/2008     | BCSS-1    | Ca-LEAP              | 0.1941                    | 0.0045      | 5432                                    | 529               | 2                 |
| 1/28/2008     | MESS-1    | Ca-LEAP              | 0.1496                    | 0.0041      | 4817                                    | 457               | 2                 |
| 1/28/2008     | NIST-2704 | Ca-LEAP              | 1.0052                    | 0.0116      | 26000                                   | 300               | 2                 |
| 1/28/2008     | NIST-2709 | Ca-LEAP              | 0.6721                    | 0.0086      | 18900                                   | 500               | 2                 |
| 1/28/2008     | NIST-2710 | Ca-LEAP              | 0.4454                    | 0.0074      | 12500                                   | 300               | 2                 |
| 1/28/2008     | NIST-2711 | Ca-LEAP              | 1.0204                    | 0.0112      | 28800                                   | 800               | 2                 |
| 1/28/2008     | MAG-1     | Ca-LEAP              | 0.3449                    | 0.0065      | 9791                                    | 715               | 2                 |
| 1/28/2008     | SCO-1     | Ca-LEAP              | 0.7004                    | 0.0088      | 18725                                   | 1429              | 2                 |
| 1/28/2008     | SDO-1     | Ca-LEAP              | 0.2743                    | 0.0062      | 7504                                    | 336               | 2                 |
| 1/28/2008     | BCSS-1    | Ti-LEAP              | 0.3952                    | 0.0087      | 4400                                    | 144               | 2                 |
| 1/28/2008     | MESS-1    | Ti-LEAP              | 0.4602                    | 0.0092      | 5425                                    | 168               | 2                 |
| 1/28/2008     | NIST-2704 | Ti-LEAP              | 0.4418                    | 0.0101      | 4570                                    | 180               | 2                 |
| 1/28/2008     | NIST-2709 | Ti-LEAP              | 0.3051                    | 0.0086      | 3420                                    | 240               | 2                 |
| 1/28/2008     | NIST-2710 | Ti-LEAP              | 0.2857                    | 0.0094      | 2830                                    | 100               | 2                 |
| 1/28/2008     | NIST-2711 | Ti-LEAP              | 0.2669                    | 0.0078      | 3060                                    | 230               | 2                 |
| 1/28/2008     | MAG-1     | Ti-LEAP              | 0.3945                    | 0.0102      | 4496                                    | 420               | 2                 |
| 1/28/2008     | SCO-1     | Ti-LEAP              | 0.3121                    | 0.0085      | 3776                                    | 360               | 2                 |
| 1/28/2008     | SDO-1     | Ti-LEAP              | 0.4226                    | 0.0111      | 4256                                    | 186               | 2                 |

| Analysis Date | SRM       | Element <sup>A</sup> | FP-XRF                    |             | Standard reference material information |                   |                   |
|---------------|-----------|----------------------|---------------------------|-------------|-----------------------------------------|-------------------|-------------------|
|               |           |                      | signal (cps) <sup>B</sup> | uncertainty | concentration (ppm)                     | uncertainty (ppm) | flag <sup>C</sup> |
| 1/28/2008     | BCSS-1    | Ti                   | 0.0210                    | 0.0007      | 4400                                    | 144               | 2                 |
| 1/28/2008     | MESS-1    | Ti                   | 0.0269                    | 0.0007      | 5425                                    | 168               | 2                 |
| 1/28/2008     | NIST-2704 | Ti                   | 0.0230                    | 0.0007      | 4570                                    | 180               | 2                 |
| 1/28/2008     | NIST-2709 | Ti                   | 0.0166                    | 0.0006      | 3420                                    | 240               | 2                 |
| 1/28/2008     | NIST-2711 | Ti                   | 0.0153                    | 0.0006      | 3060                                    | 230               | 2                 |
| 1/28/2008     | MAG-1     | Ti                   | 0.0232                    | 0.0008      | 4496                                    | 420               | 2                 |
| 1/28/2008     | SCO-1     | Ti                   | 0.0160                    | 0.0006      | 3776                                    | 360               | 2                 |
| 1/28/2008     | SDO-1     | Ti                   | 0.0235                    | 0.0008      | 4256                                    | 186               | 2                 |
| 1/28/2008     | BCSS-1    | V                    | 0.0020                    | 0.0004      | 93.4                                    | 4.9               | 2                 |
| 1/28/2008     | MESS-1    | V                    | 0.0013                    | 0.0004      | 72.4                                    | 17                | 2                 |
| 1/28/2008     | NIST-2704 | V                    | 0.0019                    | 0.0004      | 95                                      | 4                 | 2                 |
| 1/28/2008     | NIST-2709 | V                    | 0.0023                    | 0.0004      | 112                                     | 5                 | 2                 |
| 1/28/2008     | NIST-2711 | V                    | 0.0018                    | 0.0004      | 81.6                                    | 2.9               | 2                 |
| 1/28/2008     | MAG-1     | V                    | 0.0027                    | 0.0005      | 140                                     | 6                 | 2                 |
| 1/28/2008     | SCO-1     | V                    | 0.0026                    | 0.0004      | 130                                     | 13                | 2                 |
| 1/28/2008     | SDO-1     | V                    | 0.0031                    | 0.0005      | 160                                     | 21                | 2                 |
| 1/28/2008     | BCSS-1    | Cr-LEAP              | 0.0391                    | 0.0028      | 123                                     | 14                | 2                 |
| 1/28/2008     | MESS-1    | Cr-LEAP              | 0.0265                    | 0.0025      | 71                                      | 11                | 2                 |
| 1/28/2008     | NIST-2704 | Cr-LEAP              | 0.0464                    | 0.0032      | 135                                     | 5                 | 2                 |
| 1/28/2008     | NIST-2709 | Cr-LEAP              | 0.0451                    | 0.0032      | 130                                     | 4                 | 2                 |
| 1/28/2008     | NIST-2711 | Cr-LEAP              | 0.0148                    | 0.0025      | 47                                      | 4.7               | 1                 |
| 1/28/2008     | MAG-1     | Cr-LEAP              | 0.0290                    | 0.0035      | 97                                      | 8                 | 2                 |
| 1/28/2008     | SCO-1     | Cr-LEAP              | 0.0233                    | 0.0028      | 68                                      | 5                 | 2                 |
| 1/28/2008     | SDO-1     | Cr-LEAP              | 0.0230                    | 0.0038      | 66.4                                    | 7.6               | 2                 |
| 1/28/2008     | BCSS-1    | Cr                   | 0.0019                    | 0.0004      | 123                                     | 14                | 2                 |
| 1/28/2008     | MESS-1    | Cr                   | 0.0016                    | 0.0004      | 71                                      | 11                | 2                 |
| 1/28/2008     | NIST-2704 | Cr                   | 0.0024                    | 0.0004      | 135                                     | 5                 | 2                 |
| 1/28/2008     | NIST-2709 | Cr                   | 0.0019                    | 0.0004      | 130                                     | 4                 | 2                 |
| 1/28/2008     | MAG-1     | Cr                   | 0.0019                    | 0.0005      | 97                                      | 8                 | 2                 |
| 1/28/2008     | SCO-1     | Cr                   | 0.0013                    | 0.0004      | 68                                      | 5                 | 2                 |
| 1/28/2008     | BCSS-1    | Mn-LEAP              | 0.0518                    | 0.0042      | 229                                     | 15                | 2                 |
| 1/28/2008     | MESS-1    | Mn-LEAP              | 0.1275                    | 0.0046      | 513                                     | 25                | 2                 |
| 1/28/2008     | NIST-2704 | Mn-LEAP              | 0.1893                    | 0.0054      | 555                                     | 19                | 2                 |
| 1/28/2008     | NIST-2709 | Mn-LEAP              | 0.1697                    | 0.0050      | 538                                     | 17                | 2                 |
| 1/28/2008     | NIST-2711 | Mn-LEAP              | 0.2065                    | 0.0050      | 638                                     | 28                | 2                 |

| Analysis Date | SRM       | Element <sup>A</sup> | FP-XRF                    |             | Standard reference material information |                   |                   |
|---------------|-----------|----------------------|---------------------------|-------------|-----------------------------------------|-------------------|-------------------|
|               |           |                      | signal (cps) <sup>B</sup> | uncertainty | concentration (ppm)                     | uncertainty (ppm) | flag <sup>C</sup> |
| 1/28/2008     | MAG-1     | Mn-LEAP              | 0.2441                    | 0.0063      | 759                                     | 70                | 2                 |
| 1/28/2008     | SCO-1     | Mn-LEAP              | 0.1011                    | 0.0046      | 410                                     | 30                | 2                 |
| 1/28/2008     | SDO-1     | Mn-LEAP              | 0.0648                    | 0.0059      | 325                                     | 39                | 2                 |
| 1/28/2008     | BCSS-1    | Mn                   | 0.0044                    | 0.0005      | 229                                     | 15                | 2                 |
| 1/28/2008     | MESS-1    | Mn                   | 0.0085                    | 0.0006      | 513                                     | 25                | 2                 |
| 1/28/2008     | NIST-2704 | Mn                   | 0.0120                    | 0.0007      | 555                                     | 19                | 2                 |
| 1/28/2008     | NIST-2709 | Mn                   | 0.0104                    | 0.0006      | 538                                     | 17                | 2                 |
| 1/28/2008     | NIST-2711 | Mn                   | 0.0115                    | 0.0006      | 638                                     | 28                | 2                 |
| 1/28/2008     | MAG-1     | Mn                   | 0.0148                    | 0.0008      | 759                                     | 70                | 2                 |
| 1/28/2008     | SCO-1     | Mn                   | 0.0068                    | 0.0006      | 410                                     | 30                | 2                 |
| 1/28/2008     | SDO-1     | Mn                   | 0.0042                    | 0.0007      | 325                                     | 39                | 2                 |
| 1/28/2008     | BCSS-1    | Fe-LEAP              | 17.0713                   | 0.1298      | 32873                                   | 979               | 2                 |
| 1/28/2008     | MESS-1    | Fe-LEAP              | 15.6404                   | 0.1195      | 30495                                   | 1749              | 2                 |
| 1/28/2008     | NIST-2704 | Fe-LEAP              | 21.8840                   | 0.1760      | 41100                                   | 1000              | 2                 |
| 1/28/2008     | NIST-2709 | Fe-LEAP              | 18.9015                   | 0.1477      | 35000                                   | 1100              | 2                 |
| 1/28/2008     | NIST-2711 | Fe-LEAP              | 14.2246                   | 0.1113      | 28900                                   | 600               | 2                 |
| 1/28/2008     | MAG-1     | Fe-LEAP              | 26.5892                   | 0.2172      | 47561                                   | 4197              | 2                 |
| 1/28/2008     | SCO-1     | Fe-LEAP              | 18.6560                   | 0.1461      | 35881                                   | 1259              | 2                 |
| 1/28/2008     | SDO-1     | Fe-LEAP              | 34.6016                   | 0.2900      | 65327                                   | 1469              | 2                 |
| 1/28/2008     | BCSS-1    | Fe                   | 1.1147                    | 0.0057      | 32873                                   | 979               | 2                 |
| 1/28/2008     | MESS-1    | Fe                   | 1.0250                    | 0.0054      | 30495                                   | 1749              | 2                 |
| 1/28/2008     | NIST-2704 | Fe                   | 1.4566                    | 0.0074      | 41100                                   | 1000              | 2                 |
| 1/28/2008     | NIST-2709 | Fe                   | 1.1716                    | 0.0059      | 35000                                   | 1100              | 2                 |
| 1/28/2008     | NIST-2711 | Fe                   | 0.9494                    | 0.0052      | 28900                                   | 600               | 2                 |
| 1/28/2008     | MAG-1     | Fe                   | 1.7829                    | 0.0088      | 47561                                   | 4197              | 2                 |
| 1/28/2008     | SCO-1     | Fe                   | 1.1827                    | 0.0060      | 35881                                   | 1259              | 2                 |
| 1/28/2008     | SDO-1     | Fe                   | 2.4212                    | 0.0116      | 65327                                   | 1469              | 2                 |
| 1/28/2008     | BCSS-1    | Co                   | 0.0144                    | 0.0017      | 11.4                                    | 2.1               | 2                 |
| 1/28/2008     | MESS-1    | Co                   | 0.0107                    | 0.0016      | 10.8                                    | 1.9               | 2                 |
| 1/28/2008     | NIST-2704 | Co                   | 0.0168                    | 0.0020      | 14                                      | 0.6               | 2                 |
| 1/28/2008     | NIST-2709 | Co                   | 0.0122                    | 0.0017      | 13.4                                    | 0.7               | 2                 |
| 1/28/2008     | NIST-2711 | Co                   | 0.0103                    | 0.0016      | 10                                      | 1                 | 1                 |
| 1/28/2008     | MAG-1     | Co                   | 0.0208                    | 0.0022      | 20                                      | 1.6               | 2                 |
| 1/28/2008     | SCO-1     | Co                   | 0.0182                    | 0.0018      | 11                                      | 0.8               | 2                 |
| 1/28/2008     | SDO-1     | Co                   | 0.0307                    | 0.0026      | 46.8                                    | 6.3               | 2                 |

| Analysis Date | SRM       | Element <sup>A</sup> | FP-XRF                    |             | Standard reference material information |                   |                   |
|---------------|-----------|----------------------|---------------------------|-------------|-----------------------------------------|-------------------|-------------------|
|               |           |                      | signal (cps) <sup>B</sup> | uncertainty | concentration (ppm)                     | uncertainty (ppm) | flag <sup>C</sup> |
| 1/28/2008     | BCSS-1    | Ni                   | 0.0026                    | 0.0006      | 55.3                                    | 3.6               | 2                 |
| 1/28/2008     | NIST-2709 | Ni                   | 0.0028                    | 0.0006      | 88                                      | 5                 | 2                 |
| 1/28/2008     | SDO-1     | Ni                   | 0.0026                    | 0.0008      | 99.5                                    | 9.9               | 2                 |
| 1/28/2008     | MESS-1    | Cu                   | 0.0022                    | 0.0004      | 25.1                                    | 3.8               | 2                 |
| 1/28/2008     | NIST-2704 | Cu                   | 0.0088                    | 0.0005      | 98.6                                    | 5                 | 2                 |
| 1/28/2008     | NIST-2709 | Cu                   | 0.0027                    | 0.0004      | 34.6                                    | 0.7               | 2                 |
| 1/28/2008     | NIST-2711 | Cu                   | 0.0104                    | 0.0005      | 114                                     | 2                 | 2                 |
| 1/28/2008     | MAG-1     | Cu                   | 0.0023                    | 0.0005      | 30                                      | 3                 | 2                 |
| 1/28/2008     | SCO-1     | Cu                   | 0.0029                    | 0.0004      | 29                                      | 2                 | 2                 |
| 1/28/2008     | SDO-1     | Cu                   | 0.0034                    | 0.0005      | 60.2                                    | 9.6               | 2                 |
| 1/28/2008     | BCSS-1    | Zn                   | 0.0138                    | 0.0004      | 119                                     | 12                | 2                 |
| 1/28/2008     | MESS-1    | Zn                   | 0.0240                    | 0.0006      | 191                                     | 17                | 2                 |
| 1/28/2008     | NIST-2704 | Zn                   | 0.0595                    | 0.0010      | 438                                     | 12                | 2                 |
| 1/28/2008     | NIST-2709 | Zn                   | 0.0126                    | 0.0004      | 106                                     | 3                 | 2                 |
| 1/28/2008     | NIST-2711 | Zn                   | 0.0463                    | 0.0009      | 350.4                                   | 4.8               | 2                 |
| 1/28/2008     | MAG-1     | Zn                   | 0.0175                    | 0.0006      | 130                                     | 6                 | 2                 |
| 1/28/2008     | SCO-1     | Zn                   | 0.0120                    | 0.0004      | 100                                     | 8                 | 2                 |
| 1/28/2008     | SDO-1     | Zn                   | 0.0064                    | 0.0004      | 64.1                                    | 6.9               | 2                 |
| 1/28/2008     | BCSS-1    | As                   | 0.0038                    | 0.0005      | 11.1                                    | 1.4               | 2                 |
| 1/28/2008     | MESS-1    | As                   | 0.0029                    | 0.0005      | 10.6                                    | 1.2               | 2                 |
| 1/28/2008     | NIST-2704 | As                   | 0.0046                    | 0.0011      | 23.4                                    | 0.8               | 2                 |
| 1/28/2008     | NIST-2709 | As                   | 0.0048                    | 0.0005      | 17.7                                    | 0.8               | 2                 |
| 1/28/2008     | NIST-2710 | As                   | 0.1528                    | 0.0062      | 626                                     | 38                | 2                 |
| 1/28/2008     | NIST-2711 | As                   | 0.0145                    | 0.0024      | 105                                     | 8                 | 2                 |
| 1/28/2008     | MAG-1     | As                   | 0.0032                    | 0.0005      | 9.2                                     | 0.92              | 1                 |
| 1/28/2008     | SCO-1     | As                   | 0.0032                    | 0.0005      | 12                                      | 1                 | 2                 |
| 1/28/2008     | SDO-1     | As                   | 0.0196                    | 0.0008      | 68.5                                    | 8.6               | 2                 |
| 1/28/2008     | NIST-2704 | Br                   | 0.0030                    | 0.0004      | 7                                       | 0.7               | 1                 |
| 1/28/2008     | NIST-2710 | Br                   | 0.0082                    | 0.0013      | 6                                       | 0.6               | 1                 |
| 1/28/2008     | NIST-2711 | Br                   | 0.0048                    | 0.0004      | 5                                       | 0.5               | 1                 |
| 1/28/2008     | MAG-1     | Br                   | 0.1102                    | 0.0013      | 250                                     | 25                | 1                 |
| 1/28/2008     | NIST-2704 | Rb                   | 0.0664                    | 0.0014      | 100                                     | 10                | 1                 |
| 1/28/2008     | NIST-2709 | Rb                   | 0.0600                    | 0.0014      | 96                                      | 9.6               | 1                 |
| 1/28/2008     | NIST-2710 | Rb                   | 0.0833                    | 0.0021      | 120                                     | 12                | 1                 |
| 1/28/2008     | NIST-2711 | Rb                   | 0.0734                    | 0.0014      | 110                                     | 11                | 1                 |

| Analysis Date | SRM       | Element <sup>A</sup> | FP-XRF                    |             | Standard reference material information |                   |                   |
|---------------|-----------|----------------------|---------------------------|-------------|-----------------------------------------|-------------------|-------------------|
|               |           |                      | signal (cps) <sup>B</sup> | uncertainty | concentration (ppm)                     | uncertainty (ppm) | flag <sup>C</sup> |
| 1/28/2008     | MAG-1     | Rb                   | 0.1003                    | 0.0021      | 150                                     | 6                 | 2                 |
| 1/28/2008     | SCO-1     | Rb                   | 0.0706                    | 0.0014      | 110                                     | 4                 | 2                 |
| 1/28/2008     | SDO-1     | Rb                   | 0.0777                    | 0.0014      | 126                                     | 3.9               | 2                 |
| 1/28/2008     | BCSS-1    | Sr                   | 0.0784                    | 0.0008      | 96                                      | 9.6               | 1                 |
| 1/28/2008     | MESS-1    | Sr                   | 0.0690                    | 0.0008      | 89                                      | 8.9               | 1                 |
| 1/28/2008     | NIST-2704 | Sr                   | 0.1034                    | 0.0016      | 130                                     | 13                | 1                 |
| 1/28/2008     | NIST-2709 | Sr                   | 0.1716                    | 0.0016      | 231                                     | 2                 | 2                 |
| 1/28/2008     | NIST-2710 | Sr                   | 0.2594                    | 0.0024      | 330                                     | 33                | 1                 |
| 1/28/2008     | NIST-2711 | Sr                   | 0.1841                    | 0.0016      | 245.3                                   | 0.7               | 2                 |
| 1/28/2008     | MAG-1     | Sr                   | 0.1089                    | 0.0016      | 150                                     | 15                | 2                 |
| 1/28/2008     | SCO-1     | Sr                   | 0.1262                    | 0.0016      | 170                                     | 16                | 2                 |
| 1/28/2008     | SDO-1     | Sr                   | 0.0580                    | 0.0008      | 75.1                                    | 11                | 2                 |
| 1/28/2008     | NIST-2704 | Zr                   | 0.2969                    | 0.0023      | 300                                     | 30                | 1                 |
| 1/28/2008     | NIST-2709 | Zr                   | 0.1403                    | 0.0023      | 160                                     | 16                | 1                 |
| 1/28/2008     | NIST-2711 | Zr                   | 0.2724                    | 0.0023      | 230                                     | 23                | 1                 |
| 1/28/2008     | MAG-1     | Zr                   | 0.1321                    | 0.0023      | 130                                     | 13                | 2                 |
| 1/28/2008     | SCO-1     | Zr                   | 0.1742                    | 0.0023      | 160                                     | 30                | 2                 |
| 1/28/2008     | SDO-1     | Zr                   | 0.1625                    | 0.0023      | 165                                     | 24                | 2                 |
| 1/28/2008     | MESS-1    | Mo                   | 0.0062                    | 0.0025      | 2.2                                     | 0.22              | 1                 |
| 1/28/2008     | NIST-2710 | Mo                   | 0.0199                    | 0.0025      | 19                                      | 1.9               | 1                 |
| 1/28/2008     | SDO-1     | Mo                   | 0.1627                    | 0.0025      | 134                                     | 21                | 2                 |
| 1/28/2008     | NIST-2704 | Ba                   | 0.0708                    | 0.0048      | 414                                     | 12                | 2                 |
| 1/28/2008     | NIST-2709 | Ba                   | 0.0841                    | 0.0044      | 968                                     | 40                | 2                 |
| 1/28/2008     | NIST-2710 | Ba                   | 0.0789                    | 0.0050      | 707                                     | 51                | 2                 |
| 1/28/2008     | NIST-2711 | Ba                   | 0.0641                    | 0.0040      | 726                                     | 38                | 2                 |
| 1/28/2008     | MAG-1     | Ba                   | 0.0917                    | 0.0052      | 480                                     | 41                | 2                 |
| 1/28/2008     | SCO-1     | Ba                   | 0.0775                    | 0.0044      | 570                                     | 30                | 2                 |
| 1/28/2008     | SDO-1     | Ba                   | 0.0953                    | 0.0057      | 397                                     | 38                | 2                 |
| 1/28/2008     | NIST-2704 | Hg                   | 0.0011                    | 0.0003      | 1.44                                    | 0.07              | 2                 |
| 1/28/2008     | NIST-2709 | Hg                   | 0.0009                    | 0.0003      | 1.4                                     | 0.08              | 2                 |
| 1/28/2008     | NIST-2710 | Hg                   | 0.0097                    | 0.0008      | 32.6                                    | 1.8               | 2                 |
| 1/28/2008     | NIST-2711 | Hg                   | 0.0018                    | 0.0003      | 6.25                                    | 0.19              | 2                 |
| 1/28/2008     | MAG-1     | Hg                   | 0.0014                    | 0.0003      | 0.02                                    | 0.002             | 1                 |
| 1/28/2008     | SDO-1     | Hg                   | 0.0012                    | 0.0003      | 0.19                                    | 0.08              | 2                 |
| 1/28/2008     | BCSS-1    | Pb                   | 0.0043                    | 0.0004      | 22.7                                    | 3.4               | 2                 |

| Analysis Date | SRM       | Element <sup>A</sup> | FP-XRF                    |             | Standard reference material information |                   |                   |
|---------------|-----------|----------------------|---------------------------|-------------|-----------------------------------------|-------------------|-------------------|
|               |           |                      | signal (cps) <sup>B</sup> | uncertainty | concentration (ppm)                     | uncertainty (ppm) | flag <sup>C</sup> |
| 1/28/2008     | MESS-1    | Pb                   | 0.0065                    | 0.0004      | 34                                      | 6.1               | 2                 |
| 1/28/2008     | NIST-2704 | Pb                   | 0.0307                    | 0.0009      | 161                                     | 17                | 2                 |
| 1/28/2008     | NIST-2709 | Pb                   | 0.0032                    | 0.0004      | 18.9                                    | 0.5               | 2                 |
| 1/28/2008     | NIST-2711 | Pb                   | 0.2379                    | 0.0022      | 1162                                    | 31                | 2                 |
| 1/28/2008     | MAG-1     | Pb                   | 0.0043                    | 0.0004      | 24                                      | 3                 | 2                 |
| 1/28/2008     | SCO-1     | Pb                   | 0.0054                    | 0.0004      | 31                                      | 3                 | 2                 |
| 1/28/2008     | SDO-1     | Pb                   | 0.0045                    | 0.0004      | 27.9                                    | 5.2               | 2                 |
| 1/28/2008     | NIST-2704 | U                    | 0.0034                    | 0.0008      | 3.13                                    | 0.13              | 2                 |
| 1/28/2008     | NIST-2709 | U                    | 0.0029                    | 0.0008      | 3                                       | 0.3               | 1                 |
| 1/28/2008     | NIST-2710 | U                    | 0.0097                    | 0.0011      | 25                                      | 2.5               | 1                 |
| 1/28/2008     | NIST-2711 | U                    | 0.0034                    | 0.0008      | 2.6                                     | 0.26              | 1                 |
| 1/28/2008     | SDO-1     | U                    | 0.0145                    | 0.0011      | 48.8                                    | 6.5               | 2                 |
| 2/1/2008      | NIST-2710 | S-LEAP               | 0.0101                    | 0.0020      | 2400                                    | 60                | 2                 |
| 2/1/2008      | NIST-2710 | S-LEAP               | 0.0064                    | 0.0020      | 2400                                    | 60                | 2                 |
| 2/1/2008      | NIST-2710 | S-LEAP               | 0.0078                    | 0.0020      | 2400                                    | 60                | 2                 |
| 2/1/2008      | NIST-2710 | S-LEAP               | 0.0065                    | 0.0020      | 2400                                    | 60                | 2                 |
| 2/1/2008      | NIST-2710 | S-LEAP               | 0.0090                    | 0.0020      | 2400                                    | 60                | 2                 |
| 2/1/2008      | BCSS-1    | S-LEAP               | 0.0056                    | 0.0016      | 3600                                    | 500               | 2                 |
| 2/1/2008      | MESS-1    | S-LEAP               | 0.0085                    | 0.0016      | 7200                                    | 500               | 2                 |
| 2/1/2008      | MESS-1    | S-LEAP               | 0.0073                    | 0.0016      | 7200                                    | 500               | 2                 |
| 2/1/2008      | MESS-1    | S-LEAP               | 0.0101                    | 0.0016      | 7200                                    | 500               | 2                 |
| 2/1/2008      | MESS-1    | S-LEAP               | 0.0099                    | 0.0016      | 7200                                    | 500               | 2                 |
| 2/1/2008      | MESS-1    | S-LEAP               | 0.0062                    | 0.0016      | 7200                                    | 500               | 2                 |
| 2/1/2008      | MESS-1    | S-LEAP               | 0.0113                    | 0.0017      | 7200                                    | 500               | 2                 |
| 2/1/2008      | MESS-1    | S-LEAP               | 0.0085                    | 0.0016      | 7200                                    | 500               | 2                 |
| 2/1/2008      | MESS-1    | S-LEAP               | 0.0073                    | 0.0016      | 7200                                    | 500               | 2                 |
| 2/1/2008      | SDO-1     | S-LEAP               | 0.0379                    | 0.0026      | 53500                                   | 4400              | 2                 |
| 2/1/2008      | SDO-1     | S-LEAP               | 0.0412                    | 0.0027      | 53500                                   | 4400              | 2                 |
| 2/1/2008      | SDO-1     | S-LEAP               | 0.0424                    | 0.0027      | 53500                                   | 4400              | 2                 |
| 2/1/2008      | SDO-1     | S-LEAP               | 0.0425                    | 0.0026      | 53500                                   | 4400              | 2                 |
| 2/1/2008      | SDO-1     | S-LEAP               | 0.0374                    | 0.0025      | 53500                                   | 4400              | 2                 |
| 2/1/2008      | MAG-1     | CI-LEAP              | 0.1009                    | 0.0036      | 31000                                   | 600               | 2                 |
| 2/1/2008      | MAG-1     | CI-LEAP              | 0.0910                    | 0.0035      | 31000                                   | 600               | 2                 |
| 2/1/2008      | MAG-1     | CI-LEAP              | 0.0992                    | 0.0036      | 31000                                   | 600               | 2                 |
| 2/1/2008      | MAG-1     | CI-LEAP              | 0.0989                    | 0.0036      | 31000                                   | 600               | 2                 |

| Analysis Date | SRM       | Element <sup>A</sup> | FP-XRF                    |             | Standard reference material information |                   |                   |
|---------------|-----------|----------------------|---------------------------|-------------|-----------------------------------------|-------------------|-------------------|
|               |           |                      | signal (cps) <sup>B</sup> | uncertainty | concentration (ppm)                     | uncertainty (ppm) | flag <sup>C</sup> |
| 2/1/2008      | MAG-1     | Cl-LEAP              | 0.0916                    | 0.0035      | 31000                                   | 600               | 2                 |
| 2/1/2008      | BCSS-1    | Cl-LEAP              | 0.0421                    | 0.0025      | 11200                                   | 500               | 2                 |
| 2/1/2008      | BCSS-1    | Cl-LEAP              | 0.0421                    | 0.0025      | 11200                                   | 500               | 2                 |
| 2/1/2008      | BCSS-1    | Cl-LEAP              | 0.0437                    | 0.0025      | 11200                                   | 500               | 2                 |
| 2/1/2008      | BCSS-1    | Cl-LEAP              | 0.0429                    | 0.0025      | 11200                                   | 500               | 2                 |
| 2/1/2008      | BCSS-1    | Cl-LEAP              | 0.0430                    | 0.0025      | 11200                                   | 500               | 2                 |
| 2/1/2008      | MESS-1    | Cl-LEAP              | 0.0414                    | 0.0025      | 8200                                    | 700               | 2                 |
| 2/1/2008      | MESS-1    | Cl-LEAP              | 0.0385                    | 0.0024      | 8200                                    | 700               | 2                 |
| 2/1/2008      | MESS-1    | Cl-LEAP              | 0.0396                    | 0.0025      | 8200                                    | 700               | 2                 |
| 2/1/2008      | MESS-1    | Cl-LEAP              | 0.0407                    | 0.0025      | 8200                                    | 700               | 2                 |
| 2/1/2008      | MESS-1    | Cl-LEAP              | 0.0402                    | 0.0025      | 8200                                    | 700               | 2                 |
| 2/1/2008      | MESS-1    | Cl-LEAP              | 0.0395                    | 0.0025      | 8200                                    | 700               | 2                 |
| 2/1/2008      | MESS-1    | Cl-LEAP              | 0.0408                    | 0.0025      | 8200                                    | 700               | 2                 |
| 2/1/2008      | MESS-1    | Cl-LEAP              | 0.0420                    | 0.0025      | 8200                                    | 700               | 2                 |
| 2/1/2008      | SCO-1     | K-LEAP               | 0.3731                    | 0.0056      | 22995                                   | 664               | 2                 |
| 2/1/2008      | SCO-1     | K-LEAP               | 0.3686                    | 0.0055      | 22995                                   | 664               | 2                 |
| 2/1/2008      | SCO-1     | K-LEAP               | 0.3592                    | 0.0054      | 22995                                   | 664               | 2                 |
| 2/1/2008      | SCO-1     | K-LEAP               | 0.3693                    | 0.0056      | 22995                                   | 664               | 2                 |
| 2/1/2008      | SCO-1     | K-LEAP               | 0.3719                    | 0.0056      | 22995                                   | 664               | 2                 |
| 2/1/2008      | NIST-2710 | K-LEAP               | 0.3877                    | 0.0063      | 21100                                   | 1100              | 2                 |
| 2/1/2008      | NIST-2710 | K-LEAP               | 0.3778                    | 0.0062      | 21100                                   | 1100              | 2                 |
| 2/1/2008      | NIST-2710 | K-LEAP               | 0.3870                    | 0.0063      | 21100                                   | 1100              | 2                 |
| 2/1/2008      | NIST-2710 | K-LEAP               | 0.3964                    | 0.0063      | 21100                                   | 1100              | 2                 |
| 2/1/2008      | NIST-2710 | K-LEAP               | 0.3703                    | 0.0061      | 21100                                   | 1100              | 2                 |
| 2/1/2008      | MAG-1     | K-LEAP               | 0.5185                    | 0.0072      | 29470                                   | 1411              | 2                 |
| 2/1/2008      | MAG-1     | K-LEAP               | 0.5318                    | 0.0074      | 29470                                   | 1411              | 2                 |
| 2/1/2008      | MAG-1     | K-LEAP               | 0.5327                    | 0.0074      | 29470                                   | 1411              | 2                 |
| 2/1/2008      | MAG-1     | K-LEAP               | 0.5282                    | 0.0073      | 29470                                   | 1411              | 2                 |
| 2/1/2008      | MAG-1     | K-LEAP               | 0.5310                    | 0.0074      | 29470                                   | 1411              | 2                 |
| 2/1/2008      | BCSS-1    | K-LEAP               | 0.2932                    | 0.0048      | 18014                                   | 332               | 2                 |
| 2/1/2008      | BCSS-1    | K-LEAP               | 0.2991                    | 0.0048      | 18014                                   | 332               | 2                 |
| 2/1/2008      | BCSS-1    | K-LEAP               | 0.2941                    | 0.0048      | 18014                                   | 332               | 2                 |
| 2/1/2008      | BCSS-1    | K-LEAP               | 0.2898                    | 0.0047      | 18014                                   | 332               | 2                 |
| 2/1/2008      | BCSS-1    | K-LEAP               | 0.2904                    | 0.0048      | 18014                                   | 332               | 2                 |
| 2/1/2008      | MESS-1    | K-LEAP               | 0.3021                    | 0.0049      | 18595                                   | 332               | 2                 |

| Analysis Date | SRM       | Element <sup>A</sup> | FP-XRF                    |             | Standard reference material information |                   |                   |
|---------------|-----------|----------------------|---------------------------|-------------|-----------------------------------------|-------------------|-------------------|
|               |           |                      | signal (cps) <sup>B</sup> | uncertainty | concentration (ppm)                     | uncertainty (ppm) | flag <sup>C</sup> |
| 2/1/2008      | MESS-1    | K-LEAP               | 0.2923                    | 0.0047      | 18595                                   | 332               | 2                 |
| 2/1/2008      | MESS-1    | K-LEAP               | 0.2949                    | 0.0048      | 18595                                   | 332               | 2                 |
| 2/1/2008      | MESS-1    | K-LEAP               | 0.3044                    | 0.0049      | 18595                                   | 332               | 2                 |
| 2/1/2008      | MESS-1    | K-LEAP               | 0.2936                    | 0.0048      | 18595                                   | 332               | 2                 |
| 2/1/2008      | MESS-1    | K-LEAP               | 0.2948                    | 0.0048      | 18595                                   | 332               | 2                 |
| 2/1/2008      | MESS-1    | K-LEAP               | 0.2994                    | 0.0048      | 18595                                   | 332               | 2                 |
| 2/1/2008      | MESS-1    | K-LEAP               | 0.2969                    | 0.0048      | 18595                                   | 332               | 2                 |
| 2/1/2008      | NIST-2709 | K-LEAP               | 0.3214                    | 0.0052      | 20300                                   | 600               | 2                 |
| 2/1/2008      | NIST-2709 | K-LEAP               | 0.3179                    | 0.0052      | 20300                                   | 600               | 2                 |
| 2/1/2008      | NIST-2709 | K-LEAP               | 0.3191                    | 0.0052      | 20300                                   | 600               | 2                 |
| 2/1/2008      | NIST-2709 | K-LEAP               | 0.3247                    | 0.0053      | 20300                                   | 600               | 2                 |
| 2/1/2008      | NIST-2709 | K-LEAP               | 0.3240                    | 0.0052      | 20300                                   | 600               | 2                 |
| 2/1/2008      | NIST-2711 | K-LEAP               | 0.4013                    | 0.0059      | 24500                                   | 800               | 2                 |
| 2/1/2008      | NIST-2711 | K-LEAP               | 0.4045                    | 0.0058      | 24500                                   | 800               | 2                 |
| 2/1/2008      | NIST-2711 | K-LEAP               | 0.4056                    | 0.0059      | 24500                                   | 800               | 2                 |
| 2/1/2008      | NIST-2711 | K-LEAP               | 0.3930                    | 0.0058      | 24500                                   | 800               | 2                 |
| 2/1/2008      | NIST-2711 | K-LEAP               | 0.4014                    | 0.0059      | 24500                                   | 800               | 2                 |
| 2/1/2008      | NIST-2711 | K-LEAP               | 0.4039                    | 0.0059      | 24500                                   | 800               | 2                 |
| 2/1/2008      | NIST-2704 | K-LEAP               | 0.3672                    | 0.0058      | 20000                                   | 400               | 2                 |
| 2/1/2008      | NIST-2704 | K-LEAP               | 0.3874                    | 0.0061      | 20000                                   | 400               | 2                 |
| 2/1/2008      | NIST-2704 | K-LEAP               | 0.3822                    | 0.0060      | 20000                                   | 400               | 2                 |
| 2/1/2008      | NIST-2704 | K-LEAP               | 0.3832                    | 0.0060      | 20000                                   | 400               | 2                 |
| 2/1/2008      | NIST-2704 | K-LEAP               | 0.3784                    | 0.0059      | 20000                                   | 400               | 2                 |
| 2/1/2008      | SDO-1     | K-LEAP               | 0.5256                    | 0.0075      | 27810                                   | 506               | 2                 |
| 2/1/2008      | SDO-1     | K-LEAP               | 0.5300                    | 0.0076      | 27810                                   | 506               | 2                 |
| 2/1/2008      | SDO-1     | K-LEAP               | 0.5130                    | 0.0075      | 27810                                   | 506               | 2                 |
| 2/1/2008      | SDO-1     | K-LEAP               | 0.5223                    | 0.0075      | 27810                                   | 506               | 2                 |
| 2/1/2008      | SDO-1     | K-LEAP               | 0.5268                    | 0.0075      | 27810                                   | 506               | 2                 |
| 2/1/2008      | SCO-1     | Ca-LEAP              | 0.6973                    | 0.0087      | 18725                                   | 1429              | 2                 |
| 2/1/2008      | SCO-1     | Ca-LEAP              | 0.6906                    | 0.0086      | 18725                                   | 1429              | 2                 |
| 2/1/2008      | SCO-1     | Ca-LEAP              | 0.6721                    | 0.0084      | 18725                                   | 1429              | 2                 |
| 2/1/2008      | SCO-1     | Ca-LEAP              | 0.6982                    | 0.0087      | 18725                                   | 1429              | 2                 |
| 2/1/2008      | SCO-1     | Ca-LEAP              | 0.6957                    | 0.0087      | 18725                                   | 1429              | 2                 |
| 2/1/2008      | NIST-2710 | Ca-LEAP              | 0.4652                    | 0.0076      | 12500                                   | 300               | 2                 |
| 2/1/2008      | NIST-2710 | Ca-LEAP              | 0.4636                    | 0.0075      | 12500                                   | 300               | 2                 |



| Analysis Date | SRM       | Element <sup>A</sup> | FP-XRF                    |             | Standard reference material information |                   |                   |
|---------------|-----------|----------------------|---------------------------|-------------|-----------------------------------------|-------------------|-------------------|
|               |           |                      | signal (cps) <sup>B</sup> | uncertainty | concentration (ppm)                     | uncertainty (ppm) | flag <sup>C</sup> |
| 2/1/2008      | NIST-2710 | Ca-LEAP              | 0.4652                    | 0.0076      | 12500                                   | 300               | 2                 |
| 2/1/2008      | NIST-2710 | Ca-LEAP              | 0.4535                    | 0.0074      | 12500                                   | 300               | 2                 |
| 2/1/2008      | NIST-2710 | Ca-LEAP              | 0.4535                    | 0.0074      | 12500                                   | 300               | 2                 |
| 2/1/2008      | MAG-1     | Ca-LEAP              | 0.3379                    | 0.0064      | 9791                                    | 715               | 2                 |
| 2/1/2008      | MAG-1     | Ca-LEAP              | 0.3502                    | 0.0065      | 9791                                    | 715               | 2                 |
| 2/1/2008      | MAG-1     | Ca-LEAP              | 0.3536                    | 0.0066      | 9791                                    | 715               | 2                 |
| 2/1/2008      | MAG-1     | Ca-LEAP              | 0.3455                    | 0.0065      | 9791                                    | 715               | 2                 |
| 2/1/2008      | MAG-1     | Ca-LEAP              | 0.3435                    | 0.0065      | 9791                                    | 715               | 2                 |
| 2/1/2008      | BCSS-1    | Ca-LEAP              | 0.1889                    | 0.0044      | 5432                                    | 529               | 2                 |
| 2/1/2008      | BCSS-1    | Ca-LEAP              | 0.1942                    | 0.0045      | 5432                                    | 529               | 2                 |
| 2/1/2008      | BCSS-1    | Ca-LEAP              | 0.1956                    | 0.0045      | 5432                                    | 529               | 2                 |
| 2/1/2008      | BCSS-1    | Ca-LEAP              | 0.2000                    | 0.0045      | 5432                                    | 529               | 2                 |
| 2/1/2008      | BCSS-1    | Ca-LEAP              | 0.1940                    | 0.0045      | 5432                                    | 529               | 2                 |
| 2/1/2008      | MESS-1    | Ca-LEAP              | 0.1578                    | 0.0042      | 4817                                    | 457               | 2                 |
| 2/1/2008      | MESS-1    | Ca-LEAP              | 0.1508                    | 0.0041      | 4817                                    | 457               | 2                 |
| 2/1/2008      | MESS-1    | Ca-LEAP              | 0.1538                    | 0.0041      | 4817                                    | 457               | 2                 |
| 2/1/2008      | MESS-1    | Ca-LEAP              | 0.1508                    | 0.0041      | 4817                                    | 457               | 2                 |
| 2/1/2008      | MESS-1    | Ca-LEAP              | 0.1555                    | 0.0041      | 4817                                    | 457               | 2                 |
| 2/1/2008      | MESS-1    | Ca-LEAP              | 0.1510                    | 0.0041      | 4817                                    | 457               | 2                 |
| 2/1/2008      | MESS-1    | Ca-LEAP              | 0.1423                    | 0.0040      | 4817                                    | 457               | 2                 |
| 2/1/2008      | MESS-1    | Ca-LEAP              | 0.1530                    | 0.0041      | 4817                                    | 457               | 2                 |
| 2/1/2008      | NIST-2709 | Ca-LEAP              | 0.6510                    | 0.0083      | 18900                                   | 500               | 2                 |
| 2/1/2008      | NIST-2709 | Ca-LEAP              | 0.6633                    | 0.0085      | 18900                                   | 500               | 2                 |
| 2/1/2008      | NIST-2709 | Ca-LEAP              | 0.6788                    | 0.0086      | 18900                                   | 500               | 2                 |
| 2/1/2008      | NIST-2709 | Ca-LEAP              | 0.6684                    | 0.0085      | 18900                                   | 500               | 2                 |
| 2/1/2008      | NIST-2709 | Ca-LEAP              | 0.6690                    | 0.0085      | 18900                                   | 500               | 2                 |
| 2/1/2008      | NIST-2711 | Ca-LEAP              | 1.0256                    | 0.0113      | 28800                                   | 800               | 2                 |
| 2/1/2008      | NIST-2711 | Ca-LEAP              | 1.0254                    | 0.0110      | 28800                                   | 800               | 2                 |
| 2/1/2008      | NIST-2711 | Ca-LEAP              | 1.0356                    | 0.0113      | 28800                                   | 800               | 2                 |
| 2/1/2008      | NIST-2711 | Ca-LEAP              | 1.0233                    | 0.0112      | 28800                                   | 800               | 2                 |
| 2/1/2008      | NIST-2711 | Ca-LEAP              | 1.0502                    | 0.0114      | 28800                                   | 800               | 2                 |
| 2/1/2008      | NIST-2711 | Ca-LEAP              | 1.0236                    | 0.0112      | 28800                                   | 800               | 2                 |
| 2/1/2008      | NIST-2704 | Ca-LEAP              | 0.9954                    | 0.0114      | 26000                                   | 300               | 2                 |
| 2/1/2008      | NIST-2704 | Ca-LEAP              | 1.0145                    | 0.0117      | 26000                                   | 300               | 2                 |
| 2/1/2008      | NIST-2704 | Ca-LEAP              | 1.0105                    | 0.0116      | 26000                                   | 300               | 2                 |

| Analysis Date | SRM       | Element <sup>A</sup> | FP-XRF                    |             | Standard reference material information |                   |                   |
|---------------|-----------|----------------------|---------------------------|-------------|-----------------------------------------|-------------------|-------------------|
|               |           |                      | signal (cps) <sup>B</sup> | uncertainty | concentration (ppm)                     | uncertainty (ppm) | flag <sup>C</sup> |
| 2/1/2008      | NIST-2704 | Ca-LEAP              | 0.9932                    | 0.0114      | 26000                                   | 300               | 2                 |
| 2/1/2008      | NIST-2704 | Ca-LEAP              | 1.0250                    | 0.0117      | 26000                                   | 300               | 2                 |
| 2/1/2008      | SDO-1     | Ca-LEAP              | 0.2803                    | 0.0062      | 7504                                    | 336               | 2                 |
| 2/1/2008      | SDO-1     | Ca-LEAP              | 0.2708                    | 0.0062      | 7504                                    | 336               | 2                 |
| 2/1/2008      | SDO-1     | Ca-LEAP              | 0.2910                    | 0.0063      | 7504                                    | 336               | 2                 |
| 2/1/2008      | SDO-1     | Ca-LEAP              | 0.2762                    | 0.0062      | 7504                                    | 336               | 2                 |
| 2/1/2008      | SDO-1     | Ca-LEAP              | 0.2791                    | 0.0061      | 7504                                    | 336               | 2                 |
| 2/1/2008      | SCO-1     | Ti-LEAP              | 0.3052                    | 0.0083      | 3776                                    | 360               | 2                 |
| 2/1/2008      | SCO-1     | Ti-LEAP              | 0.3098                    | 0.0084      | 3776                                    | 360               | 2                 |
| 2/1/2008      | SCO-1     | Ti-LEAP              | 0.2892                    | 0.0082      | 3776                                    | 360               | 2                 |
| 2/1/2008      | SCO-1     | Ti-LEAP              | 0.2919                    | 0.0083      | 3776                                    | 360               | 2                 |
| 2/1/2008      | SCO-1     | Ti-LEAP              | 0.3051                    | 0.0084      | 3776                                    | 360               | 2                 |
| 2/1/2008      | NIST-2710 | Ti-LEAP              | 0.2823                    | 0.0094      | 2830                                    | 100               | 2                 |
| 2/1/2008      | NIST-2710 | Ti-LEAP              | 0.2891                    | 0.0093      | 2830                                    | 100               | 2                 |
| 2/1/2008      | NIST-2710 | Ti-LEAP              | 0.2812                    | 0.0094      | 2830                                    | 100               | 2                 |
| 2/1/2008      | NIST-2710 | Ti-LEAP              | 0.2775                    | 0.0092      | 2830                                    | 100               | 2                 |
| 2/1/2008      | NIST-2710 | Ti-LEAP              | 0.2630                    | 0.0091      | 2830                                    | 100               | 2                 |
| 2/1/2008      | MAG-1     | Ti-LEAP              | 0.4055                    | 0.0102      | 4496                                    | 420               | 2                 |
| 2/1/2008      | MAG-1     | Ti-LEAP              | 0.4082                    | 0.0103      | 4496                                    | 420               | 2                 |
| 2/1/2008      | MAG-1     | Ti-LEAP              | 0.4193                    | 0.0103      | 4496                                    | 420               | 2                 |
| 2/1/2008      | MAG-1     | Ti-LEAP              | 0.3991                    | 0.0102      | 4496                                    | 420               | 2                 |
| 2/1/2008      | MAG-1     | Ti-LEAP              | 0.4102                    | 0.0104      | 4496                                    | 420               | 2                 |
| 2/1/2008      | BCSS-1    | Ti-LEAP              | 0.3889                    | 0.0086      | 4400                                    | 144               | 2                 |
| 2/1/2008      | BCSS-1    | Ti-LEAP              | 0.3891                    | 0.0086      | 4400                                    | 144               | 2                 |
| 2/1/2008      | BCSS-1    | Ti-LEAP              | 0.3953                    | 0.0087      | 4400                                    | 144               | 2                 |
| 2/1/2008      | BCSS-1    | Ti-LEAP              | 0.3783                    | 0.0086      | 4400                                    | 144               | 2                 |
| 2/1/2008      | BCSS-1    | Ti-LEAP              | 0.3977                    | 0.0088      | 4400                                    | 144               | 2                 |
| 2/1/2008      | MESS-1    | Ti-LEAP              | 0.4701                    | 0.0094      | 5425                                    | 168               | 2                 |
| 2/1/2008      | MESS-1    | Ti-LEAP              | 0.4662                    | 0.0092      | 5425                                    | 168               | 2                 |
| 2/1/2008      | MESS-1    | Ti-LEAP              | 0.4560                    | 0.0092      | 5425                                    | 168               | 2                 |
| 2/1/2008      | MESS-1    | Ti-LEAP              | 0.4706                    | 0.0093      | 5425                                    | 168               | 2                 |
| 2/1/2008      | MESS-1    | Ti-LEAP              | 0.4703                    | 0.0092      | 5425                                    | 168               | 2                 |
| 2/1/2008      | MESS-1    | Ti-LEAP              | 0.4822                    | 0.0093      | 5425                                    | 168               | 2                 |
| 2/1/2008      | MESS-1    | Ti-LEAP              | 0.4655                    | 0.0092      | 5425                                    | 168               | 2                 |
| 2/1/2008      | MESS-1    | Ti-LEAP              | 0.4606                    | 0.0091      | 5425                                    | 168               | 2                 |

| Analysis Date | SRM       | Element <sup>A</sup> | FP-XRF                    |             | Standard reference material information |                   |                   |
|---------------|-----------|----------------------|---------------------------|-------------|-----------------------------------------|-------------------|-------------------|
|               |           |                      | signal (cps) <sup>B</sup> | uncertainty | concentration (ppm)                     | uncertainty (ppm) | flag <sup>C</sup> |
| 2/1/2008      | NIST-2709 | Ti-LEAP              | 0.2932                    | 0.0083      | 3420                                    | 240               | 2                 |
| 2/1/2008      | NIST-2709 | Ti-LEAP              | 0.3034                    | 0.0085      | 3420                                    | 240               | 2                 |
| 2/1/2008      | NIST-2709 | Ti-LEAP              | 0.3107                    | 0.0086      | 3420                                    | 240               | 2                 |
| 2/1/2008      | NIST-2709 | Ti-LEAP              | 0.3054                    | 0.0085      | 3420                                    | 240               | 2                 |
| 2/1/2008      | NIST-2709 | Ti-LEAP              | 0.2951                    | 0.0085      | 3420                                    | 240               | 2                 |
| 2/1/2008      | NIST-2711 | Ti-LEAP              | 0.2520                    | 0.0077      | 3060                                    | 230               | 2                 |
| 2/1/2008      | NIST-2711 | Ti-LEAP              | 0.2607                    | 0.0076      | 3060                                    | 230               | 2                 |
| 2/1/2008      | NIST-2711 | Ti-LEAP              | 0.2653                    | 0.0078      | 3060                                    | 230               | 2                 |
| 2/1/2008      | NIST-2711 | Ti-LEAP              | 0.2591                    | 0.0077      | 3060                                    | 230               | 2                 |
| 2/1/2008      | NIST-2711 | Ti-LEAP              | 0.2648                    | 0.0078      | 3060                                    | 230               | 2                 |
| 2/1/2008      | NIST-2711 | Ti-LEAP              | 0.2572                    | 0.0077      | 3060                                    | 230               | 2                 |
| 2/1/2008      | NIST-2704 | Ti-LEAP              | 0.4479                    | 0.0099      | 4570                                    | 180               | 2                 |
| 2/1/2008      | NIST-2704 | Ti-LEAP              | 0.4569                    | 0.0103      | 4570                                    | 180               | 2                 |
| 2/1/2008      | NIST-2704 | Ti-LEAP              | 0.4612                    | 0.0101      | 4570                                    | 180               | 2                 |
| 2/1/2008      | NIST-2704 | Ti-LEAP              | 0.4597                    | 0.0101      | 4570                                    | 180               | 2                 |
| 2/1/2008      | NIST-2704 | Ti-LEAP              | 0.4446                    | 0.0100      | 4570                                    | 180               | 2                 |
| 2/1/2008      | SDO-1     | Ti-LEAP              | 0.4121                    | 0.0109      | 4256                                    | 186               | 2                 |
| 2/1/2008      | SDO-1     | Ti-LEAP              | 0.4392                    | 0.0112      | 4256                                    | 186               | 2                 |
| 2/1/2008      | SDO-1     | Ti-LEAP              | 0.4240                    | 0.0110      | 4256                                    | 186               | 2                 |
| 2/1/2008      | SDO-1     | Ti-LEAP              | 0.4462                    | 0.0110      | 4256                                    | 186               | 2                 |
| 2/1/2008      | SDO-1     | Ti-LEAP              | 0.4009                    | 0.0107      | 4256                                    | 186               | 2                 |
| 2/1/2008      | BCSS-1    | Ti                   | 0.0197                    | 0.0006      | 4400                                    | 144               | 2                 |
| 2/1/2008      | BCSS-1    | Ti                   | 0.0201                    | 0.0007      | 4400                                    | 144               | 2                 |
| 2/1/2008      | BCSS-1    | Ti                   | 0.0201                    | 0.0007      | 4400                                    | 144               | 2                 |
| 2/1/2008      | BCSS-1    | Ti                   | 0.0199                    | 0.0007      | 4400                                    | 144               | 2                 |
| 2/1/2008      | BCSS-1    | Ti                   | 0.0215                    | 0.0007      | 4400                                    | 144               | 2                 |
| 2/1/2008      | MESS-1    | Ti                   | 0.0258                    | 0.0007      | 5425                                    | 168               | 2                 |
| 2/1/2008      | MESS-1    | Ti                   | 0.0256                    | 0.0007      | 5425                                    | 168               | 2                 |
| 2/1/2008      | MESS-1    | Ti                   | 0.0269                    | 0.0007      | 5425                                    | 168               | 2                 |
| 2/1/2008      | MESS-1    | Ti                   | 0.0257                    | 0.0007      | 5425                                    | 168               | 2                 |
| 2/1/2008      | MESS-1    | Ti                   | 0.0262                    | 0.0007      | 5425                                    | 168               | 2                 |
| 2/1/2008      | MESS-1    | Ti                   | 0.0243                    | 0.0007      | 5425                                    | 168               | 2                 |
| 2/1/2008      | MESS-1    | Ti                   | 0.0260                    | 0.0007      | 5425                                    | 168               | 2                 |
| 2/1/2008      | MESS-1    | Ti                   | 0.0253                    | 0.0007      | 5425                                    | 168               | 2                 |
| 2/1/2008      | NIST-2709 | Ti                   | 0.0160                    | 0.0006      | 3420                                    | 240               | 2                 |

| Analysis Date | SRM       | Element <sup>A</sup> | FP-XRF                    |             | Standard reference material information |                   |                   |
|---------------|-----------|----------------------|---------------------------|-------------|-----------------------------------------|-------------------|-------------------|
|               |           |                      | signal (cps) <sup>B</sup> | uncertainty | concentration (ppm)                     | uncertainty (ppm) | flag <sup>C</sup> |
| 2/1/2008      | NIST-2709 | Ti                   | 0.0157                    | 0.0006      | 3420                                    | 240               | 2                 |
| 2/1/2008      | NIST-2709 | Ti                   | 0.0167                    | 0.0006      | 3420                                    | 240               | 2                 |
| 2/1/2008      | NIST-2709 | Ti                   | 0.0172                    | 0.0006      | 3420                                    | 240               | 2                 |
| 2/1/2008      | NIST-2709 | Ti                   | 0.0155                    | 0.0006      | 3420                                    | 240               | 2                 |
| 2/1/2008      | NIST-2704 | Ti                   | 0.0241                    | 0.0008      | 4570                                    | 180               | 2                 |
| 2/1/2008      | NIST-2704 | Ti                   | 0.0241                    | 0.0008      | 4570                                    | 180               | 2                 |
| 2/1/2008      | NIST-2704 | Ti                   | 0.0246                    | 0.0008      | 4570                                    | 180               | 2                 |
| 2/1/2008      | NIST-2704 | Ti                   | 0.0244                    | 0.0008      | 4570                                    | 180               | 2                 |
| 2/1/2008      | NIST-2704 | Ti                   | 0.0246                    | 0.0008      | 4570                                    | 180               | 2                 |
| 2/1/2008      | SCO-1     | Ti                   | 0.0178                    | 0.0006      | 3776                                    | 360               | 2                 |
| 2/1/2008      | SCO-1     | Ti                   | 0.0175                    | 0.0006      | 3776                                    | 360               | 2                 |
| 2/1/2008      | SCO-1     | Ti                   | 0.0179                    | 0.0006      | 3776                                    | 360               | 2                 |
| 2/1/2008      | SCO-1     | Ti                   | 0.0171                    | 0.0006      | 3776                                    | 360               | 2                 |
| 2/1/2008      | SCO-1     | Ti                   | 0.0169                    | 0.0006      | 3776                                    | 360               | 2                 |
| 2/1/2008      | MAG-1     | Ti                   | 0.0233                    | 0.0008      | 4496                                    | 420               | 2                 |
| 2/1/2008      | MAG-1     | Ti                   | 0.0219                    | 0.0008      | 4496                                    | 420               | 2                 |
| 2/1/2008      | MAG-1     | Ti                   | 0.0239                    | 0.0008      | 4496                                    | 420               | 2                 |
| 2/1/2008      | MAG-1     | Ti                   | 0.0244                    | 0.0008      | 4496                                    | 420               | 2                 |
| 2/1/2008      | MAG-1     | Ti                   | 0.0233                    | 0.0008      | 4496                                    | 420               | 2                 |
| 2/1/2008      | NIST-2711 | Ti                   | 0.0148                    | 0.0006      | 3060                                    | 230               | 2                 |
| 2/1/2008      | NIST-2711 | Ti                   | 0.0150                    | 0.0006      | 3060                                    | 230               | 2                 |
| 2/1/2008      | NIST-2711 | Ti                   | 0.0147                    | 0.0006      | 3060                                    | 230               | 2                 |
| 2/1/2008      | NIST-2711 | Ti                   | 0.0151                    | 0.0006      | 3060                                    | 230               | 2                 |
| 2/1/2008      | NIST-2711 | Ti                   | 0.0140                    | 0.0006      | 3060                                    | 230               | 2                 |
| 2/1/2008      | NIST-2711 | Ti                   | 0.0143                    | 0.0006      | 3060                                    | 230               | 2                 |
| 2/1/2008      | SDO-1     | Ti                   | 0.0243                    | 0.0008      | 4256                                    | 186               | 2                 |
| 2/1/2008      | SDO-1     | Ti                   | 0.0230                    | 0.0008      | 4256                                    | 186               | 2                 |
| 2/1/2008      | SDO-1     | Ti                   | 0.0233                    | 0.0008      | 4256                                    | 186               | 2                 |
| 2/1/2008      | SDO-1     | Ti                   | 0.0224                    | 0.0008      | 4256                                    | 186               | 2                 |
| 2/1/2008      | SDO-1     | Ti                   | 0.0235                    | 0.0008      | 4256                                    | 186               | 2                 |
| 2/1/2008      | SCO-1     | V                    | 0.0015                    | 0.0004      | 130                                     | 13                | 2                 |
| 2/1/2008      | SCO-1     | V                    | 0.0018                    | 0.0004      | 130                                     | 13                | 2                 |
| 2/1/2008      | SCO-1     | V                    | 0.0023                    | 0.0004      | 130                                     | 13                | 2                 |
| 2/1/2008      | SCO-1     | V                    | 0.0019                    | 0.0004      | 130                                     | 13                | 2                 |
| 2/1/2008      | SCO-1     | V                    | 0.0025                    | 0.0004      | 130                                     | 13                | 2                 |

| Analysis Date | SRM       | Element <sup>A</sup> | FP-XRF                    |             | Standard reference material information |                   |                   |
|---------------|-----------|----------------------|---------------------------|-------------|-----------------------------------------|-------------------|-------------------|
|               |           |                      | signal (cps) <sup>B</sup> | uncertainty | concentration (ppm)                     | uncertainty (ppm) | flag <sup>C</sup> |
| 2/1/2008      | NIST-2710 | V                    | 0.0016                    | 0.0005      | 76.6                                    | 2.3               | 2                 |
| 2/1/2008      | NIST-2710 | V                    | 0.0024                    | 0.0005      | 76.6                                    | 2.3               | 2                 |
| 2/1/2008      | NIST-2710 | V                    | 0.0018                    | 0.0005      | 76.6                                    | 2.3               | 2                 |
| 2/1/2008      | MAG-1     | V                    | 0.0020                    | 0.0005      | 140                                     | 6                 | 2                 |
| 2/1/2008      | MAG-1     | V                    | 0.0026                    | 0.0005      | 140                                     | 6                 | 2                 |
| 2/1/2008      | MAG-1     | V                    | 0.0019                    | 0.0005      | 140                                     | 6                 | 2                 |
| 2/1/2008      | MAG-1     | V                    | 0.0025                    | 0.0005      | 140                                     | 6                 | 2                 |
| 2/1/2008      | MAG-1     | V                    | 0.0035                    | 0.0005      | 140                                     | 6                 | 2                 |
| 2/1/2008      | BCSS-1    | V                    | 0.0013                    | 0.0004      | 93.4                                    | 4.9               | 2                 |
| 2/1/2008      | BCSS-1    | V                    | 0.0019                    | 0.0004      | 93.4                                    | 4.9               | 2                 |
| 2/1/2008      | BCSS-1    | V                    | 0.0015                    | 0.0004      | 93.4                                    | 4.9               | 2                 |
| 2/1/2008      | BCSS-1    | V                    | 0.0015                    | 0.0004      | 93.4                                    | 4.9               | 2                 |
| 2/1/2008      | BCSS-1    | V                    | 0.0019                    | 0.0004      | 93.4                                    | 4.9               | 2                 |
| 2/1/2008      | MESS-1    | V                    | 0.0019                    | 0.0004      | 72.4                                    | 17                | 2                 |
| 2/1/2008      | MESS-1    | V                    | 0.0017                    | 0.0004      | 72.4                                    | 17                | 2                 |
| 2/1/2008      | MESS-1    | V                    | 0.0025                    | 0.0004      | 72.4                                    | 17                | 2                 |
| 2/1/2008      | MESS-1    | V                    | 0.0023                    | 0.0004      | 72.4                                    | 17                | 2                 |
| 2/1/2008      | MESS-1    | V                    | 0.0020                    | 0.0004      | 72.4                                    | 17                | 2                 |
| 2/1/2008      | MESS-1    | V                    | 0.0015                    | 0.0004      | 72.4                                    | 17                | 2                 |
| 2/1/2008      | MESS-1    | V                    | 0.0017                    | 0.0004      | 72.4                                    | 17                | 2                 |
| 2/1/2008      | NIST-2709 | V                    | 0.0018                    | 0.0004      | 112                                     | 5                 | 2                 |
| 2/1/2008      | NIST-2709 | V                    | 0.0022                    | 0.0004      | 112                                     | 5                 | 2                 |
| 2/1/2008      | NIST-2709 | V                    | 0.0021                    | 0.0004      | 112                                     | 5                 | 2                 |
| 2/1/2008      | NIST-2709 | V                    | 0.0020                    | 0.0004      | 112                                     | 5                 | 2                 |
| 2/1/2008      | NIST-2709 | V                    | 0.0025                    | 0.0004      | 112                                     | 5                 | 2                 |
| 2/1/2008      | NIST-2711 | V                    | 0.0016                    | 0.0004      | 81.6                                    | 2.9               | 2                 |
| 2/1/2008      | NIST-2711 | V                    | 0.0021                    | 0.0004      | 81.6                                    | 2.9               | 2                 |
| 2/1/2008      | NIST-2711 | V                    | 0.0019                    | 0.0004      | 81.6                                    | 2.9               | 2                 |
| 2/1/2008      | NIST-2711 | V                    | 0.0014                    | 0.0004      | 81.6                                    | 2.9               | 2                 |
| 2/1/2008      | NIST-2711 | V                    | 0.0014                    | 0.0004      | 81.6                                    | 2.9               | 2                 |
| 2/1/2008      | NIST-2711 | V                    | 0.0013                    | 0.0004      | 81.6                                    | 2.9               | 2                 |
| 2/1/2008      | NIST-2704 | V                    | 0.0021                    | 0.0004      | 95                                      | 4                 | 2                 |
| 2/1/2008      | NIST-2704 | V                    | 0.0016                    | 0.0004      | 95                                      | 4                 | 2                 |
| 2/1/2008      | NIST-2704 | V                    | 0.0015                    | 0.0004      | 95                                      | 4                 | 2                 |
| 2/1/2008      | NIST-2704 | V                    | 0.0021                    | 0.0004      | 95                                      | 4                 | 2                 |

| Analysis Date | SRM       | Element <sup>A</sup> | FP-XRF                    |             | Standard reference material information |                   |                   |
|---------------|-----------|----------------------|---------------------------|-------------|-----------------------------------------|-------------------|-------------------|
|               |           |                      | signal (cps) <sup>B</sup> | uncertainty | concentration (ppm)                     | uncertainty (ppm) | flag <sup>C</sup> |
| 2/1/2008      | NIST-2704 | V                    | 0.0020                    | 0.0004      | 95                                      | 4                 | 2                 |
| 2/1/2008      | SDO-1     | V                    | 0.0027                    | 0.0005      | 160                                     | 21                | 2                 |
| 2/1/2008      | SDO-1     | V                    | 0.0026                    | 0.0005      | 160                                     | 21                | 2                 |
| 2/1/2008      | SDO-1     | V                    | 0.0037                    | 0.0005      | 160                                     | 21                | 2                 |
| 2/1/2008      | SDO-1     | V                    | 0.0026                    | 0.0005      | 160                                     | 21                | 2                 |
| 2/1/2008      | SDO-1     | V                    | 0.0024                    | 0.0005      | 160                                     | 21                | 2                 |
| 2/1/2008      | BCSS-1    | Cr-LEAP              | 0.0366                    | 0.0028      | 123                                     | 14                | 2                 |
| 2/1/2008      | BCSS-1    | Cr-LEAP              | 0.0397                    | 0.0028      | 123                                     | 14                | 2                 |
| 2/1/2008      | BCSS-1    | Cr-LEAP              | 0.0445                    | 0.0028      | 123                                     | 14                | 2                 |
| 2/1/2008      | BCSS-1    | Cr-LEAP              | 0.0445                    | 0.0028      | 123                                     | 14                | 2                 |
| 2/1/2008      | BCSS-1    | Cr-LEAP              | 0.0457                    | 0.0028      | 123                                     | 14                | 2                 |
| 2/1/2008      | MESS-1    | Cr-LEAP              | 0.0255                    | 0.0028      | 71                                      | 11                | 2                 |
| 2/1/2008      | MESS-1    | Cr-LEAP              | 0.0240                    | 0.0025      | 71                                      | 11                | 2                 |
| 2/1/2008      | MESS-1    | Cr-LEAP              | 0.0278                    | 0.0025      | 71                                      | 11                | 2                 |
| 2/1/2008      | MESS-1    | Cr-LEAP              | 0.0192                    | 0.0025      | 71                                      | 11                | 2                 |
| 2/1/2008      | MESS-1    | Cr-LEAP              | 0.0224                    | 0.0025      | 71                                      | 11                | 2                 |
| 2/1/2008      | MESS-1    | Cr-LEAP              | 0.0221                    | 0.0025      | 71                                      | 11                | 2                 |
| 2/1/2008      | MESS-1    | Cr-LEAP              | 0.0208                    | 0.0025      | 71                                      | 11                | 2                 |
| 2/1/2008      | MESS-1    | Cr-LEAP              | 0.0240                    | 0.0025      | 71                                      | 11                | 2                 |
| 2/1/2008      | NIST-2709 | Cr-LEAP              | 0.0372                    | 0.0028      | 130                                     | 4                 | 2                 |
| 2/1/2008      | NIST-2709 | Cr-LEAP              | 0.0407                    | 0.0032      | 130                                     | 4                 | 2                 |
| 2/1/2008      | NIST-2709 | Cr-LEAP              | 0.0407                    | 0.0032      | 130                                     | 4                 | 2                 |
| 2/1/2008      | NIST-2709 | Cr-LEAP              | 0.0385                    | 0.0032      | 130                                     | 4                 | 2                 |
| 2/1/2008      | NIST-2709 | Cr-LEAP              | 0.0356                    | 0.0032      | 130                                     | 4                 | 2                 |
| 2/1/2008      | NIST-2704 | Cr-LEAP              | 0.0435                    | 0.0032      | 135                                     | 5                 | 2                 |
| 2/1/2008      | NIST-2704 | Cr-LEAP              | 0.0442                    | 0.0032      | 135                                     | 5                 | 2                 |
| 2/1/2008      | NIST-2704 | Cr-LEAP              | 0.0423                    | 0.0032      | 135                                     | 5                 | 2                 |
| 2/1/2008      | NIST-2704 | Cr-LEAP              | 0.0511                    | 0.0032      | 135                                     | 5                 | 2                 |
| 2/1/2008      | NIST-2704 | Cr-LEAP              | 0.0502                    | 0.0035      | 135                                     | 5                 | 2                 |
| 2/1/2008      | SCO-1     | Cr-LEAP              | 0.0211                    | 0.0028      | 68                                      | 5                 | 2                 |
| 2/1/2008      | SCO-1     | Cr-LEAP              | 0.0233                    | 0.0028      | 68                                      | 5                 | 2                 |
| 2/1/2008      | SCO-1     | Cr-LEAP              | 0.0189                    | 0.0028      | 68                                      | 5                 | 2                 |
| 2/1/2008      | SCO-1     | Cr-LEAP              | 0.0224                    | 0.0028      | 68                                      | 5                 | 2                 |
| 2/1/2008      | SCO-1     | Cr-LEAP              | 0.0230                    | 0.0028      | 68                                      | 5                 | 2                 |
| 2/1/2008      | MAG-1     | Cr-LEAP              | 0.0353                    | 0.0035      | 97                                      | 8                 | 2                 |

| Analysis Date | SRM       | Element <sup>A</sup> | FP-XRF                    |             | Standard reference material information |                   |                   |
|---------------|-----------|----------------------|---------------------------|-------------|-----------------------------------------|-------------------|-------------------|
|               |           |                      | signal (cps) <sup>B</sup> | uncertainty | concentration (ppm)                     | uncertainty (ppm) | flag <sup>C</sup> |
| 2/1/2008      | MAG-1     | Cr-LEAP              | 0.0328                    | 0.0035      | 97                                      | 8                 | 2                 |
| 2/1/2008      | MAG-1     | Cr-LEAP              | 0.0347                    | 0.0035      | 97                                      | 8                 | 2                 |
| 2/1/2008      | MAG-1     | Cr-LEAP              | 0.0401                    | 0.0035      | 97                                      | 8                 | 2                 |
| 2/1/2008      | MAG-1     | Cr-LEAP              | 0.0350                    | 0.0035      | 97                                      | 8                 | 2                 |
| 2/1/2008      | NIST-2711 | Cr-LEAP              | 0.0183                    | 0.0025      | 47                                      | 4.7               | 1                 |
| 2/1/2008      | NIST-2711 | Cr-LEAP              | 0.0199                    | 0.0025      | 47                                      | 4.7               | 1                 |
| 2/1/2008      | NIST-2711 | Cr-LEAP              | 0.0192                    | 0.0025      | 47                                      | 4.7               | 1                 |
| 2/1/2008      | NIST-2711 | Cr-LEAP              | 0.0170                    | 0.0025      | 47                                      | 4.7               | 1                 |
| 2/1/2008      | NIST-2711 | Cr-LEAP              | 0.0151                    | 0.0025      | 47                                      | 4.7               | 1                 |
| 2/1/2008      | NIST-2711 | Cr-LEAP              | 0.0167                    | 0.0025      | 47                                      | 4.7               | 1                 |
| 2/1/2008      | SDO-1     | Cr-LEAP              | 0.0142                    | 0.0038      | 66.4                                    | 7.6               | 2                 |
| 2/1/2008      | SDO-1     | Cr-LEAP              | 0.0290                    | 0.0038      | 66.4                                    | 7.6               | 2                 |
| 2/1/2008      | SDO-1     | Cr-LEAP              | 0.0252                    | 0.0038      | 66.4                                    | 7.6               | 2                 |
| 2/1/2008      | SDO-1     | Cr-LEAP              | 0.0255                    | 0.0038      | 66.4                                    | 7.6               | 2                 |
| 2/1/2008      | SDO-1     | Cr-LEAP              | 0.0142                    | 0.0035      | 66.4                                    | 7.6               | 2                 |
| 2/1/2008      | SCO-1     | Cr                   | 0.0020                    | 0.0004      | 68                                      | 5                 | 2                 |
| 2/1/2008      | SCO-1     | Cr                   | 0.0014                    | 0.0004      | 68                                      | 5                 | 2                 |
| 2/1/2008      | MAG-1     | Cr                   | 0.0017                    | 0.0005      | 97                                      | 8                 | 2                 |
| 2/1/2008      | MAG-1     | Cr                   | 0.0020                    | 0.0005      | 97                                      | 8                 | 2                 |
| 2/1/2008      | MAG-1     | Cr                   | 0.0022                    | 0.0005      | 97                                      | 8                 | 2                 |
| 2/1/2008      | MAG-1     | Cr                   | 0.0025                    | 0.0005      | 97                                      | 8                 | 2                 |
| 2/1/2008      | BCSS-1    | Cr                   | 0.0026                    | 0.0004      | 123                                     | 14                | 2                 |
| 2/1/2008      | BCSS-1    | Cr                   | 0.0031                    | 0.0004      | 123                                     | 14                | 2                 |
| 2/1/2008      | BCSS-1    | Cr                   | 0.0027                    | 0.0004      | 123                                     | 14                | 2                 |
| 2/1/2008      | BCSS-1    | Cr                   | 0.0029                    | 0.0004      | 123                                     | 14                | 2                 |
| 2/1/2008      | BCSS-1    | Cr                   | 0.0024                    | 0.0004      | 123                                     | 14                | 2                 |
| 2/1/2008      | MESS-1    | Cr                   | 0.0012                    | 0.0004      | 71                                      | 11                | 2                 |
| 2/1/2008      | MESS-1    | Cr                   | 0.0013                    | 0.0004      | 71                                      | 11                | 2                 |
| 2/1/2008      | MESS-1    | Cr                   | 0.0012                    | 0.0004      | 71                                      | 11                | 2                 |
| 2/1/2008      | MESS-1    | Cr                   | 0.0015                    | 0.0004      | 71                                      | 11                | 2                 |
| 2/1/2008      | MESS-1    | Cr                   | 0.0012                    | 0.0004      | 71                                      | 11                | 2                 |
| 2/1/2008      | MESS-1    | Cr                   | 0.0013                    | 0.0004      | 71                                      | 11                | 2                 |
| 2/1/2008      | NIST-2709 | Cr                   | 0.0024                    | 0.0004      | 130                                     | 4                 | 2                 |
| 2/1/2008      | NIST-2709 | Cr                   | 0.0024                    | 0.0004      | 130                                     | 4                 | 2                 |
| 2/1/2008      | NIST-2709 | Cr                   | 0.0020                    | 0.0004      | 130                                     | 4                 | 2                 |

| Analysis Date | SRM       | Element <sup>A</sup> | FP-XRF                    |             | Standard reference material information |                   |                   |
|---------------|-----------|----------------------|---------------------------|-------------|-----------------------------------------|-------------------|-------------------|
|               |           |                      | signal (cps) <sup>B</sup> | uncertainty | concentration (ppm)                     | uncertainty (ppm) | flag <sup>C</sup> |
| 2/1/2008      | NIST-2709 | Cr                   | 0.0016                    | 0.0004      | 130                                     | 4                 | 2                 |
| 2/1/2008      | NIST-2709 | Cr                   | 0.0016                    | 0.0004      | 130                                     | 4                 | 2                 |
| 2/1/2008      | NIST-2704 | Cr                   | 0.0016                    | 0.0004      | 135                                     | 5                 | 2                 |
| 2/1/2008      | NIST-2704 | Cr                   | 0.0022                    | 0.0004      | 135                                     | 5                 | 2                 |
| 2/1/2008      | NIST-2704 | Cr                   | 0.0030                    | 0.0004      | 135                                     | 5                 | 2                 |
| 2/1/2008      | NIST-2704 | Cr                   | 0.0019                    | 0.0004      | 135                                     | 5                 | 2                 |
| 2/1/2008      | NIST-2704 | Cr                   | 0.0021                    | 0.0004      | 135                                     | 5                 | 2                 |
| 2/1/2008      | BCSS-1    | Mn-LEAP              | 0.0514                    | 0.0042      | 229                                     | 15                | 2                 |
| 2/1/2008      | BCSS-1    | Mn-LEAP              | 0.0568                    | 0.0042      | 229                                     | 15                | 2                 |
| 2/1/2008      | BCSS-1    | Mn-LEAP              | 0.0577                    | 0.0042      | 229                                     | 15                | 2                 |
| 2/1/2008      | BCSS-1    | Mn-LEAP              | 0.0602                    | 0.0042      | 229                                     | 15                | 2                 |
| 2/1/2008      | BCSS-1    | Mn-LEAP              | 0.0518                    | 0.0042      | 229                                     | 15                | 2                 |
| 2/1/2008      | MESS-1    | Mn-LEAP              | 0.1421                    | 0.0046      | 513                                     | 25                | 2                 |
| 2/1/2008      | MESS-1    | Mn-LEAP              | 0.1442                    | 0.0046      | 513                                     | 25                | 2                 |
| 2/1/2008      | MESS-1    | Mn-LEAP              | 0.1337                    | 0.0046      | 513                                     | 25                | 2                 |
| 2/1/2008      | MESS-1    | Mn-LEAP              | 0.1413                    | 0.0046      | 513                                     | 25                | 2                 |
| 2/1/2008      | MESS-1    | Mn-LEAP              | 0.1329                    | 0.0046      | 513                                     | 25                | 2                 |
| 2/1/2008      | MESS-1    | Mn-LEAP              | 0.1363                    | 0.0046      | 513                                     | 25                | 2                 |
| 2/1/2008      | MESS-1    | Mn-LEAP              | 0.1463                    | 0.0046      | 513                                     | 25                | 2                 |
| 2/1/2008      | MESS-1    | Mn-LEAP              | 0.1329                    | 0.0046      | 513                                     | 25                | 2                 |
| 2/1/2008      | NIST-2709 | Mn-LEAP              | 0.1701                    | 0.0050      | 538                                     | 17                | 2                 |
| 2/1/2008      | NIST-2709 | Mn-LEAP              | 0.1739                    | 0.0050      | 538                                     | 17                | 2                 |
| 2/1/2008      | NIST-2709 | Mn-LEAP              | 0.1755                    | 0.0050      | 538                                     | 17                | 2                 |
| 2/1/2008      | NIST-2709 | Mn-LEAP              | 0.1684                    | 0.0050      | 538                                     | 17                | 2                 |
| 2/1/2008      | NIST-2709 | Mn-LEAP              | 0.1751                    | 0.0050      | 538                                     | 17                | 2                 |
| 2/1/2008      | NIST-2704 | Mn-LEAP              | 0.1776                    | 0.0054      | 555                                     | 19                | 2                 |
| 2/1/2008      | NIST-2704 | Mn-LEAP              | 0.1868                    | 0.0054      | 555                                     | 19                | 2                 |
| 2/1/2008      | NIST-2704 | Mn-LEAP              | 0.1839                    | 0.0054      | 555                                     | 19                | 2                 |
| 2/1/2008      | NIST-2704 | Mn-LEAP              | 0.1831                    | 0.0054      | 555                                     | 19                | 2                 |
| 2/1/2008      | NIST-2704 | Mn-LEAP              | 0.1818                    | 0.0054      | 555                                     | 19                | 2                 |
| 2/1/2008      | SCO-1     | Mn-LEAP              | 0.1149                    | 0.0046      | 410                                     | 30                | 2                 |
| 2/1/2008      | SCO-1     | Mn-LEAP              | 0.1003                    | 0.0046      | 410                                     | 30                | 2                 |
| 2/1/2008      | SCO-1     | Mn-LEAP              | 0.1099                    | 0.0046      | 410                                     | 30                | 2                 |
| 2/1/2008      | SCO-1     | Mn-LEAP              | 0.1020                    | 0.0046      | 410                                     | 30                | 2                 |
| 2/1/2008      | SCO-1     | Mn-LEAP              | 0.1083                    | 0.0046      | 410                                     | 30                | 2                 |



| Analysis Date | SRM       | Element <sup>A</sup> | FP-XRF                    |             | Standard reference material information |                   |                   |
|---------------|-----------|----------------------|---------------------------|-------------|-----------------------------------------|-------------------|-------------------|
|               |           |                      | signal (cps) <sup>B</sup> | uncertainty | concentration (ppm)                     | uncertainty (ppm) | flag <sup>C</sup> |
| 2/1/2008      | MAG-1     | Mn-LEAP              | 0.2495                    | 0.0063      | 759                                     | 70                | 2                 |
| 2/1/2008      | MAG-1     | Mn-LEAP              | 0.2458                    | 0.0063      | 759                                     | 70                | 2                 |
| 2/1/2008      | MAG-1     | Mn-LEAP              | 0.2562                    | 0.0063      | 759                                     | 70                | 2                 |
| 2/1/2008      | MAG-1     | Mn-LEAP              | 0.2516                    | 0.0063      | 759                                     | 70                | 2                 |
| 2/1/2008      | MAG-1     | Mn-LEAP              | 0.2533                    | 0.0063      | 759                                     | 70                | 2                 |
| 2/1/2008      | NIST-2711 | Mn-LEAP              | 0.2073                    | 0.0050      | 638                                     | 28                | 2                 |
| 2/1/2008      | NIST-2711 | Mn-LEAP              | 0.1931                    | 0.0050      | 638                                     | 28                | 2                 |
| 2/1/2008      | NIST-2711 | Mn-LEAP              | 0.2027                    | 0.0050      | 638                                     | 28                | 2                 |
| 2/1/2008      | NIST-2711 | Mn-LEAP              | 0.1956                    | 0.0050      | 638                                     | 28                | 2                 |
| 2/1/2008      | NIST-2711 | Mn-LEAP              | 0.2056                    | 0.0050      | 638                                     | 28                | 2                 |
| 2/1/2008      | NIST-2711 | Mn-LEAP              | 0.2010                    | 0.0050      | 638                                     | 28                | 2                 |
| 2/1/2008      | SDO-1     | Mn-LEAP              | 0.0694                    | 0.0059      | 325                                     | 39                | 2                 |
| 2/1/2008      | SDO-1     | Mn-LEAP              | 0.0660                    | 0.0059      | 325                                     | 39                | 2                 |
| 2/1/2008      | SDO-1     | Mn-LEAP              | 0.0677                    | 0.0059      | 325                                     | 39                | 2                 |
| 2/1/2008      | SDO-1     | Mn-LEAP              | 0.0468                    | 0.0059      | 325                                     | 39                | 2                 |
| 2/1/2008      | SDO-1     | Mn-LEAP              | 0.0581                    | 0.0059      | 325                                     | 39                | 2                 |
| 2/1/2008      | BCSS-1    | Mn                   | 0.0033                    | 0.0005      | 229                                     | 15                | 2                 |
| 2/1/2008      | BCSS-1    | Mn                   | 0.0034                    | 0.0005      | 229                                     | 15                | 2                 |
| 2/1/2008      | BCSS-1    | Mn                   | 0.0039                    | 0.0005      | 229                                     | 15                | 2                 |
| 2/1/2008      | BCSS-1    | Mn                   | 0.0031                    | 0.0005      | 229                                     | 15                | 2                 |
| 2/1/2008      | BCSS-1    | Mn                   | 0.0035                    | 0.0005      | 229                                     | 15                | 2                 |
| 2/1/2008      | MESS-1    | Mn                   | 0.0084                    | 0.0006      | 513                                     | 25                | 2                 |
| 2/1/2008      | MESS-1    | Mn                   | 0.0094                    | 0.0006      | 513                                     | 25                | 2                 |
| 2/1/2008      | MESS-1    | Mn                   | 0.0091                    | 0.0006      | 513                                     | 25                | 2                 |
| 2/1/2008      | MESS-1    | Mn                   | 0.0087                    | 0.0006      | 513                                     | 25                | 2                 |
| 2/1/2008      | MESS-1    | Mn                   | 0.0085                    | 0.0006      | 513                                     | 25                | 2                 |
| 2/1/2008      | MESS-1    | Mn                   | 0.0089                    | 0.0006      | 513                                     | 25                | 2                 |
| 2/1/2008      | MESS-1    | Mn                   | 0.0085                    | 0.0006      | 513                                     | 25                | 2                 |
| 2/1/2008      | MESS-1    | Mn                   | 0.0081                    | 0.0006      | 513                                     | 25                | 2                 |
| 2/1/2008      | NIST-2709 | Mn                   | 0.0099                    | 0.0006      | 538                                     | 17                | 2                 |
| 2/1/2008      | NIST-2709 | Mn                   | 0.0106                    | 0.0006      | 538                                     | 17                | 2                 |
| 2/1/2008      | NIST-2709 | Mn                   | 0.0089                    | 0.0006      | 538                                     | 17                | 2                 |
| 2/1/2008      | NIST-2709 | Mn                   | 0.0095                    | 0.0006      | 538                                     | 17                | 2                 |
| 2/1/2008      | NIST-2709 | Mn                   | 0.0102                    | 0.0006      | 538                                     | 17                | 2                 |
| 2/1/2008      | NIST-2704 | Mn                   | 0.0113                    | 0.0007      | 555                                     | 19                | 2                 |

| Analysis Date | SRM       | Element <sup>A</sup> | FP-XRF                    |             | Standard reference material information |                   |                   |
|---------------|-----------|----------------------|---------------------------|-------------|-----------------------------------------|-------------------|-------------------|
|               |           |                      | signal (cps) <sup>B</sup> | uncertainty | concentration (ppm)                     | uncertainty (ppm) | flag <sup>C</sup> |
| 2/1/2008      | NIST-2704 | Mn                   | 0.0109                    | 0.0007      | 555                                     | 19                | 2                 |
| 2/1/2008      | NIST-2704 | Mn                   | 0.0110                    | 0.0007      | 555                                     | 19                | 2                 |
| 2/1/2008      | NIST-2704 | Mn                   | 0.0101                    | 0.0007      | 555                                     | 19                | 2                 |
| 2/1/2008      | NIST-2704 | Mn                   | 0.0122                    | 0.0007      | 555                                     | 19                | 2                 |
| 2/1/2008      | SCO-1     | Mn                   | 0.0077                    | 0.0006      | 410                                     | 30                | 2                 |
| 2/1/2008      | SCO-1     | Mn                   | 0.0071                    | 0.0006      | 410                                     | 30                | 2                 |
| 2/1/2008      | SCO-1     | Mn                   | 0.0065                    | 0.0006      | 410                                     | 30                | 2                 |
| 2/1/2008      | SCO-1     | Mn                   | 0.0069                    | 0.0006      | 410                                     | 30                | 2                 |
| 2/1/2008      | SCO-1     | Mn                   | 0.0075                    | 0.0006      | 410                                     | 30                | 2                 |
| 2/1/2008      | MAG-1     | Mn                   | 0.0156                    | 0.0008      | 759                                     | 70                | 2                 |
| 2/1/2008      | MAG-1     | Mn                   | 0.0163                    | 0.0008      | 759                                     | 70                | 2                 |
| 2/1/2008      | MAG-1     | Mn                   | 0.0154                    | 0.0008      | 759                                     | 70                | 2                 |
| 2/1/2008      | MAG-1     | Mn                   | 0.0154                    | 0.0008      | 759                                     | 70                | 2                 |
| 2/1/2008      | MAG-1     | Mn                   | 0.0142                    | 0.0008      | 759                                     | 70                | 2                 |
| 2/1/2008      | NIST-2711 | Mn                   | 0.0117                    | 0.0006      | 638                                     | 28                | 2                 |
| 2/1/2008      | NIST-2711 | Mn                   | 0.0124                    | 0.0006      | 638                                     | 28                | 2                 |
| 2/1/2008      | NIST-2711 | Mn                   | 0.0122                    | 0.0006      | 638                                     | 28                | 2                 |
| 2/1/2008      | NIST-2711 | Mn                   | 0.0110                    | 0.0006      | 638                                     | 28                | 2                 |
| 2/1/2008      | NIST-2711 | Mn                   | 0.0123                    | 0.0006      | 638                                     | 28                | 2                 |
| 2/1/2008      | NIST-2711 | Mn                   | 0.0106                    | 0.0006      | 638                                     | 28                | 2                 |
| 2/1/2008      | SDO-1     | Mn                   | 0.0027                    | 0.0007      | 325                                     | 39                | 2                 |
| 2/1/2008      | SDO-1     | Mn                   | 0.0053                    | 0.0007      | 325                                     | 39                | 2                 |
| 2/1/2008      | SDO-1     | Mn                   | 0.0031                    | 0.0007      | 325                                     | 39                | 2                 |
| 2/1/2008      | SDO-1     | Mn                   | 0.0040                    | 0.0007      | 325                                     | 39                | 2                 |
| 2/1/2008      | SDO-1     | Mn                   | 0.0035                    | 0.0007      | 325                                     | 39                | 2                 |
| 2/1/2008      | BCSS-1    | Fe-LEAP              | 17.2663                   | 0.1320      | 32873                                   | 979               | 2                 |
| 2/1/2008      | BCSS-1    | Fe-LEAP              | 17.1577                   | 0.1309      | 32873                                   | 979               | 2                 |
| 2/1/2008      | BCSS-1    | Fe-LEAP              | 17.2864                   | 0.1325      | 32873                                   | 979               | 2                 |
| 2/1/2008      | BCSS-1    | Fe-LEAP              | 17.2560                   | 0.1314      | 32873                                   | 979               | 2                 |
| 2/1/2008      | BCSS-1    | Fe-LEAP              | 17.4080                   | 0.1336      | 32873                                   | 979               | 2                 |
| 2/1/2008      | MESS-1    | Fe-LEAP              | 15.9559                   | 0.1233      | 30495                                   | 1749              | 2                 |
| 2/1/2008      | MESS-1    | Fe-LEAP              | 15.5312                   | 0.1189      | 30495                                   | 1749              | 2                 |
| 2/1/2008      | MESS-1    | Fe-LEAP              | 15.6252                   | 0.1200      | 30495                                   | 1749              | 2                 |
| 2/1/2008      | MESS-1    | Fe-LEAP              | 15.7023                   | 0.1206      | 30495                                   | 1749              | 2                 |
| 2/1/2008      | MESS-1    | Fe-LEAP              | 15.6936                   | 0.1206      | 30495                                   | 1749              | 2                 |

| Analysis Date | SRM       | Element <sup>A</sup> | FP-XRF                    |             | Standard reference material information |                   |                   |
|---------------|-----------|----------------------|---------------------------|-------------|-----------------------------------------|-------------------|-------------------|
|               |           |                      | signal (cps) <sup>B</sup> | uncertainty | concentration (ppm)                     | uncertainty (ppm) | flag <sup>C</sup> |
| 2/1/2008      | MESS-1    | Fe-LEAP              | 15.7131                   | 0.1206      | 30495                                   | 1749              | 2                 |
| 2/1/2008      | MESS-1    | Fe-LEAP              | 15.6116                   | 0.1195      | 30495                                   | 1749              | 2                 |
| 2/1/2008      | MESS-1    | Fe-LEAP              | 15.5117                   | 0.1184      | 30495                                   | 1749              | 2                 |
| 2/1/2008      | NIST-2709 | Fe-LEAP              | 18.3747                   | 0.1428      | 35000                                   | 1100              | 2                 |
| 2/1/2008      | NIST-2709 | Fe-LEAP              | 18.6310                   | 0.1455      | 35000                                   | 1100              | 2                 |
| 2/1/2008      | NIST-2709 | Fe-LEAP              | 18.7728                   | 0.1472      | 35000                                   | 1100              | 2                 |
| 2/1/2008      | NIST-2709 | Fe-LEAP              | 18.7353                   | 0.1466      | 35000                                   | 1100              | 2                 |
| 2/1/2008      | NIST-2709 | Fe-LEAP              | 18.7380                   | 0.1466      | 35000                                   | 1100              | 2                 |
| 2/1/2008      | NIST-2704 | Fe-LEAP              | 21.6054                   | 0.1722      | 41100                                   | 1000              | 2                 |
| 2/1/2008      | NIST-2704 | Fe-LEAP              | 21.9883                   | 0.1776      | 41100                                   | 1000              | 2                 |
| 2/1/2008      | NIST-2704 | Fe-LEAP              | 21.7911                   | 0.1749      | 41100                                   | 1000              | 2                 |
| 2/1/2008      | NIST-2704 | Fe-LEAP              | 21.7374                   | 0.1743      | 41100                                   | 1000              | 2                 |
| 2/1/2008      | NIST-2704 | Fe-LEAP              | 21.8808                   | 0.1754      | 41100                                   | 1000              | 2                 |
| 2/1/2008      | SCO-1     | Fe-LEAP              | 18.6669                   | 0.1445      | 35881                                   | 1259              | 2                 |
| 2/1/2008      | SCO-1     | Fe-LEAP              | 18.2960                   | 0.1412      | 35881                                   | 1259              | 2                 |
| 2/1/2008      | SCO-1     | Fe-LEAP              | 18.1645                   | 0.1396      | 35881                                   | 1259              | 2                 |
| 2/1/2008      | SCO-1     | Fe-LEAP              | 18.4410                   | 0.1428      | 35881                                   | 1259              | 2                 |
| 2/1/2008      | SCO-1     | Fe-LEAP              | 18.6587                   | 0.1450      | 35881                                   | 1259              | 2                 |
| 2/1/2008      | MAG-1     | Fe-LEAP              | 26.2220                   | 0.2140      | 47561                                   | 4197              | 2                 |
| 2/1/2008      | MAG-1     | Fe-LEAP              | 26.5946                   | 0.2178      | 47561                                   | 4197              | 2                 |
| 2/1/2008      | MAG-1     | Fe-LEAP              | 26.5892                   | 0.2178      | 47561                                   | 4197              | 2                 |
| 2/1/2008      | MAG-1     | Fe-LEAP              | 26.4724                   | 0.2161      | 47561                                   | 4197              | 2                 |
| 2/1/2008      | MAG-1     | Fe-LEAP              | 26.6511                   | 0.2189      | 47561                                   | 4197              | 2                 |
| 2/1/2008      | NIST-2711 | Fe-LEAP              | 14.4049                   | 0.1135      | 28900                                   | 600               | 2                 |
| 2/1/2008      | NIST-2711 | Fe-LEAP              | 14.2306                   | 0.1097      | 28900                                   | 600               | 2                 |
| 2/1/2008      | NIST-2711 | Fe-LEAP              | 14.4342                   | 0.1130      | 28900                                   | 600               | 2                 |
| 2/1/2008      | NIST-2711 | Fe-LEAP              | 14.3142                   | 0.1119      | 28900                                   | 600               | 2                 |
| 2/1/2008      | NIST-2711 | Fe-LEAP              | 14.5352                   | 0.1135      | 28900                                   | 600               | 2                 |
| 2/1/2008      | NIST-2711 | Fe-LEAP              | 14.3718                   | 0.1124      | 28900                                   | 600               | 2                 |
| 2/1/2008      | SDO-1     | Fe-LEAP              | 34.6048                   | 0.2895      | 65327                                   | 1469              | 2                 |
| 2/1/2008      | SDO-1     | Fe-LEAP              | 35.0002                   | 0.2954      | 65327                                   | 1469              | 2                 |
| 2/1/2008      | SDO-1     | Fe-LEAP              | 34.7297                   | 0.2922      | 65327                                   | 1469              | 2                 |
| 2/1/2008      | SDO-1     | Fe-LEAP              | 34.4528                   | 0.2884      | 65327                                   | 1469              | 2                 |
| 2/1/2008      | SDO-1     | Fe-LEAP              | 34.0286                   | 0.2824      | 65327                                   | 1469              | 2                 |
| 2/1/2008      | BCSS-1    | Fe                   | 1.1105                    | 0.0056      | 32873                                   | 979               | 2                 |

| Analysis Date | SRM       | Element <sup>A</sup> | FP-XRF                    |             | Standard reference material information |                   |                   |
|---------------|-----------|----------------------|---------------------------|-------------|-----------------------------------------|-------------------|-------------------|
|               |           |                      | signal (cps) <sup>B</sup> | uncertainty | concentration (ppm)                     | uncertainty (ppm) | flag <sup>C</sup> |
| 2/1/2008      | BCSS-1    | Fe                   | 1.1199                    | 0.0057      | 32873                                   | 979               | 2                 |
| 2/1/2008      | BCSS-1    | Fe                   | 1.1103                    | 0.0057      | 32873                                   | 979               | 2                 |
| 2/1/2008      | BCSS-1    | Fe                   | 1.1232                    | 0.0057      | 32873                                   | 979               | 2                 |
| 2/1/2008      | BCSS-1    | Fe                   | 1.1187                    | 0.0057      | 32873                                   | 979               | 2                 |
| 2/1/2008      | MESS-1    | Fe                   | 1.0281                    | 0.0054      | 30495                                   | 1749              | 2                 |
| 2/1/2008      | MESS-1    | Fe                   | 1.0175                    | 0.0053      | 30495                                   | 1749              | 2                 |
| 2/1/2008      | MESS-1    | Fe                   | 1.0233                    | 0.0053      | 30495                                   | 1749              | 2                 |
| 2/1/2008      | MESS-1    | Fe                   | 1.0358                    | 0.0054      | 30495                                   | 1749              | 2                 |
| 2/1/2008      | MESS-1    | Fe                   | 1.0420                    | 0.0054      | 30495                                   | 1749              | 2                 |
| 2/1/2008      | MESS-1    | Fe                   | 1.0274                    | 0.0054      | 30495                                   | 1749              | 2                 |
| 2/1/2008      | MESS-1    | Fe                   | 1.0305                    | 0.0054      | 30495                                   | 1749              | 2                 |
| 2/1/2008      | MESS-1    | Fe                   | 1.0317                    | 0.0054      | 30495                                   | 1749              | 2                 |
| 2/1/2008      | NIST-2709 | Fe                   | 1.1650                    | 0.0059      | 35000                                   | 1100              | 2                 |
| 2/1/2008      | NIST-2709 | Fe                   | 1.1595                    | 0.0059      | 35000                                   | 1100              | 2                 |
| 2/1/2008      | NIST-2709 | Fe                   | 1.1559                    | 0.0059      | 35000                                   | 1100              | 2                 |
| 2/1/2008      | NIST-2709 | Fe                   | 1.1613                    | 0.0059      | 35000                                   | 1100              | 2                 |
| 2/1/2008      | NIST-2709 | Fe                   | 1.1649                    | 0.0059      | 35000                                   | 1100              | 2                 |
| 2/1/2008      | NIST-2704 | Fe                   | 1.4626                    | 0.0074      | 41100                                   | 1000              | 2                 |
| 2/1/2008      | NIST-2704 | Fe                   | 1.4468                    | 0.0073      | 41100                                   | 1000              | 2                 |
| 2/1/2008      | NIST-2704 | Fe                   | 1.4528                    | 0.0073      | 41100                                   | 1000              | 2                 |
| 2/1/2008      | NIST-2704 | Fe                   | 1.4461                    | 0.0073      | 41100                                   | 1000              | 2                 |
| 2/1/2008      | NIST-2704 | Fe                   | 1.4456                    | 0.0073      | 41100                                   | 1000              | 2                 |
| 2/1/2008      | SCO-1     | Fe                   | 1.1896                    | 0.0060      | 35881                                   | 1259              | 2                 |
| 2/1/2008      | SCO-1     | Fe                   | 1.1894                    | 0.0060      | 35881                                   | 1259              | 2                 |
| 2/1/2008      | SCO-1     | Fe                   | 1.1876                    | 0.0060      | 35881                                   | 1259              | 2                 |
| 2/1/2008      | SCO-1     | Fe                   | 1.1881                    | 0.0060      | 35881                                   | 1259              | 2                 |
| 2/1/2008      | SCO-1     | Fe                   | 1.1856                    | 0.0060      | 35881                                   | 1259              | 2                 |
| 2/1/2008      | MAG-1     | Fe                   | 1.7562                    | 0.0087      | 47561                                   | 4197              | 2                 |
| 2/1/2008      | MAG-1     | Fe                   | 1.7558                    | 0.0087      | 47561                                   | 4197              | 2                 |
| 2/1/2008      | MAG-1     | Fe                   | 1.7683                    | 0.0088      | 47561                                   | 4197              | 2                 |
| 2/1/2008      | MAG-1     | Fe                   | 1.7734                    | 0.0088      | 47561                                   | 4197              | 2                 |
| 2/1/2008      | MAG-1     | Fe                   | 1.7681                    | 0.0088      | 47561                                   | 4197              | 2                 |
| 2/1/2008      | NIST-2711 | Fe                   | 0.9491                    | 0.0052      | 28900                                   | 600               | 2                 |
| 2/1/2008      | NIST-2711 | Fe                   | 0.9578                    | 0.0052      | 28900                                   | 600               | 2                 |
| 2/1/2008      | NIST-2711 | Fe                   | 0.9571                    | 0.0052      | 28900                                   | 600               | 2                 |

| Analysis Date | SRM       | Element <sup>A</sup> | FP-XRF                    |             | Standard reference material information |                   |                   |
|---------------|-----------|----------------------|---------------------------|-------------|-----------------------------------------|-------------------|-------------------|
|               |           |                      | signal (cps) <sup>B</sup> | uncertainty | concentration (ppm)                     | uncertainty (ppm) | flag <sup>C</sup> |
| 2/1/2008      | NIST-2711 | Fe                   | 0.9505                    | 0.0051      | 28900                                   | 600               | 2                 |
| 2/1/2008      | NIST-2711 | Fe                   | 0.9484                    | 0.0051      | 28900                                   | 600               | 2                 |
| 2/1/2008      | NIST-2711 | Fe                   | 0.9616                    | 0.0052      | 28900                                   | 600               | 2                 |
| 2/1/2008      | SDO-1     | Fe                   | 2.4127                    | 0.0116      | 65327                                   | 1469              | 2                 |
| 2/1/2008      | SDO-1     | Fe                   | 2.4110                    | 0.0116      | 65327                                   | 1469              | 2                 |
| 2/1/2008      | SDO-1     | Fe                   | 2.4062                    | 0.0115      | 65327                                   | 1469              | 2                 |
| 2/1/2008      | SDO-1     | Fe                   | 2.3999                    | 0.0114      | 65327                                   | 1469              | 2                 |
| 2/1/2008      | SDO-1     | Fe                   | 2.3974                    | 0.0114      | 65327                                   | 1469              | 2                 |
| 2/1/2008      | BCSS-1    | Co                   | 0.0161                    | 0.0017      | 11.4                                    | 2.1               | 2                 |
| 2/1/2008      | BCSS-1    | Co                   | 0.0169                    | 0.0017      | 11.4                                    | 2.1               | 2                 |
| 2/1/2008      | BCSS-1    | Co                   | 0.0181                    | 0.0017      | 11.4                                    | 2.1               | 2                 |
| 2/1/2008      | BCSS-1    | Co                   | 0.0168                    | 0.0017      | 11.4                                    | 2.1               | 2                 |
| 2/1/2008      | BCSS-1    | Co                   | 0.0169                    | 0.0017      | 11.4                                    | 2.1               | 2                 |
| 2/1/2008      | MESS-1    | Co                   | 0.0142                    | 0.0016      | 10.8                                    | 1.9               | 2                 |
| 2/1/2008      | MESS-1    | Co                   | 0.0128                    | 0.0016      | 10.8                                    | 1.9               | 2                 |
| 2/1/2008      | MESS-1    | Co                   | 0.0118                    | 0.0016      | 10.8                                    | 1.9               | 2                 |
| 2/1/2008      | MESS-1    | Co                   | 0.0117                    | 0.0016      | 10.8                                    | 1.9               | 2                 |
| 2/1/2008      | MESS-1    | Co                   | 0.0133                    | 0.0016      | 10.8                                    | 1.9               | 2                 |
| 2/1/2008      | MESS-1    | Co                   | 0.0147                    | 0.0016      | 10.8                                    | 1.9               | 2                 |
| 2/1/2008      | MESS-1    | Co                   | 0.0137                    | 0.0016      | 10.8                                    | 1.9               | 2                 |
| 2/1/2008      | MESS-1    | Co                   | 0.0164                    | 0.0016      | 10.8                                    | 1.9               | 2                 |
| 2/1/2008      | NIST-2709 | Co                   | 0.0170                    | 0.0017      | 13.4                                    | 0.7               | 2                 |
| 2/1/2008      | NIST-2709 | Co                   | 0.0181                    | 0.0017      | 13.4                                    | 0.7               | 2                 |
| 2/1/2008      | NIST-2709 | Co                   | 0.0164                    | 0.0017      | 13.4                                    | 0.7               | 2                 |
| 2/1/2008      | NIST-2709 | Co                   | 0.0150                    | 0.0017      | 13.4                                    | 0.7               | 2                 |
| 2/1/2008      | NIST-2709 | Co                   | 0.0165                    | 0.0017      | 13.4                                    | 0.7               | 2                 |
| 2/1/2008      | NIST-2704 | Co                   | 0.0196                    | 0.0020      | 14                                      | 0.6               | 2                 |
| 2/1/2008      | NIST-2704 | Co                   | 0.0206                    | 0.0020      | 14                                      | 0.6               | 2                 |
| 2/1/2008      | NIST-2704 | Co                   | 0.0160                    | 0.0020      | 14                                      | 0.6               | 2                 |
| 2/1/2008      | NIST-2704 | Co                   | 0.0197                    | 0.0020      | 14                                      | 0.6               | 2                 |
| 2/1/2008      | NIST-2704 | Co                   | 0.0186                    | 0.0020      | 14                                      | 0.6               | 2                 |
| 2/1/2008      | SCO-1     | Co                   | 0.0165                    | 0.0018      | 11                                      | 0.8               | 2                 |
| 2/1/2008      | SCO-1     | Co                   | 0.0184                    | 0.0018      | 11                                      | 0.8               | 2                 |
| 2/1/2008      | SCO-1     | Co                   | 0.0145                    | 0.0017      | 11                                      | 0.8               | 2                 |
| 2/1/2008      | SCO-1     | Co                   | 0.0191                    | 0.0018      | 11                                      | 0.8               | 2                 |

| Analysis Date | SRM       | Element <sup>A</sup> | FP-XRF                    |             | Standard reference material information |                   |                   |
|---------------|-----------|----------------------|---------------------------|-------------|-----------------------------------------|-------------------|-------------------|
|               |           |                      | signal (cps) <sup>B</sup> | uncertainty | concentration (ppm)                     | uncertainty (ppm) | flag <sup>C</sup> |
| 2/1/2008      | SCO-1     | Co                   | 0.0198                    | 0.0018      | 11                                      | 0.8               | 2                 |
| 2/1/2008      | MAG-1     | Co                   | 0.0257                    | 0.0022      | 20                                      | 1.6               | 2                 |
| 2/1/2008      | MAG-1     | Co                   | 0.0240                    | 0.0022      | 20                                      | 1.6               | 2                 |
| 2/1/2008      | MAG-1     | Co                   | 0.0232                    | 0.0022      | 20                                      | 1.6               | 2                 |
| 2/1/2008      | MAG-1     | Co                   | 0.0215                    | 0.0022      | 20                                      | 1.6               | 2                 |
| 2/1/2008      | MAG-1     | Co                   | 0.0268                    | 0.0023      | 20                                      | 1.6               | 2                 |
| 2/1/2008      | NIST-2711 | Co                   | 0.0140                    | 0.0016      | 10                                      | 1                 | 1                 |
| 2/1/2008      | NIST-2711 | Co                   | 0.0138                    | 0.0016      | 10                                      | 1                 | 1                 |
| 2/1/2008      | NIST-2711 | Co                   | 0.0104                    | 0.0016      | 10                                      | 1                 | 1                 |
| 2/1/2008      | NIST-2711 | Co                   | 0.0136                    | 0.0016      | 10                                      | 1                 | 1                 |
| 2/1/2008      | NIST-2711 | Co                   | 0.0124                    | 0.0016      | 10                                      | 1                 | 1                 |
| 2/1/2008      | NIST-2711 | Co                   | 0.0108                    | 0.0016      | 10                                      | 1                 | 1                 |
| 2/1/2008      | SDO-1     | Co                   | 0.0287                    | 0.0026      | 46.8                                    | 6.3               | 2                 |
| 2/1/2008      | SDO-1     | Co                   | 0.0331                    | 0.0026      | 46.8                                    | 6.3               | 2                 |
| 2/1/2008      | SDO-1     | Co                   | 0.0388                    | 0.0027      | 46.8                                    | 6.3               | 2                 |
| 2/1/2008      | SDO-1     | Co                   | 0.0346                    | 0.0026      | 46.8                                    | 6.3               | 2                 |
| 2/1/2008      | SDO-1     | Co                   | 0.0334                    | 0.0026      | 46.8                                    | 6.3               | 2                 |
| 2/1/2008      | BCSS-1    | Ni                   | 0.0020                    | 0.0005      | 55.3                                    | 3.6               | 2                 |
| 2/1/2008      | BCSS-1    | Ni                   | 0.0020                    | 0.0006      | 55.3                                    | 3.6               | 2                 |
| 2/1/2008      | BCSS-1    | Ni                   | 0.0025                    | 0.0006      | 55.3                                    | 3.6               | 2                 |
| 2/1/2008      | BCSS-1    | Ni                   | 0.0026                    | 0.0006      | 55.3                                    | 3.6               | 2                 |
| 2/1/2008      | MESS-1    | Ni                   | 0.0016                    | 0.0005      | 29.5                                    | 2.7               | 2                 |
| 2/1/2008      | MESS-1    | Ni                   | 0.0021                    | 0.0005      | 29.5                                    | 2.7               | 2                 |
| 2/1/2008      | MESS-1    | Ni                   | 0.0018                    | 0.0005      | 29.5                                    | 2.7               | 2                 |
| 2/1/2008      | NIST-2709 | Ni                   | 0.0024                    | 0.0006      | 88                                      | 5                 | 2                 |
| 2/1/2008      | NIST-2709 | Ni                   | 0.0033                    | 0.0006      | 88                                      | 5                 | 2                 |
| 2/1/2008      | NIST-2709 | Ni                   | 0.0033                    | 0.0006      | 88                                      | 5                 | 2                 |
| 2/1/2008      | NIST-2709 | Ni                   | 0.0036                    | 0.0006      | 88                                      | 5                 | 2                 |
| 2/1/2008      | NIST-2709 | Ni                   | 0.0029                    | 0.0006      | 88                                      | 5                 | 2                 |
| 2/1/2008      | SDO-1     | Ni                   | 0.0038                    | 0.0008      | 99.5                                    | 9.9               | 2                 |
| 2/1/2008      | SDO-1     | Ni                   | 0.0028                    | 0.0008      | 99.5                                    | 9.9               | 2                 |
| 2/1/2008      | SDO-1     | Ni                   | 0.0027                    | 0.0008      | 99.5                                    | 9.9               | 2                 |
| 2/1/2008      | SDO-1     | Ni                   | 0.0029                    | 0.0008      | 99.5                                    | 9.9               | 2                 |
| 2/1/2008      | BCSS-1    | Cu                   | 0.0023                    | 0.0004      | 18.5                                    | 2.7               | 2                 |
| 2/1/2008      | BCSS-1    | Cu                   | 0.0018                    | 0.0004      | 18.5                                    | 2.7               | 2                 |

| Analysis Date | SRM       | Element <sup>A</sup> | FP-XRF                    |             | Standard reference material information |                   |                   |
|---------------|-----------|----------------------|---------------------------|-------------|-----------------------------------------|-------------------|-------------------|
|               |           |                      | signal (cps) <sup>B</sup> | uncertainty | concentration (ppm)                     | uncertainty (ppm) | flag <sup>C</sup> |
| 2/1/2008      | BCSS-1    | Cu                   | 0.0016                    | 0.0004      | 18.5                                    | 2.7               | 2                 |
| 2/1/2008      | BCSS-1    | Cu                   | 0.0019                    | 0.0004      | 18.5                                    | 2.7               | 2                 |
| 2/1/2008      | BCSS-1    | Cu                   | 0.0015                    | 0.0004      | 18.5                                    | 2.7               | 2                 |
| 2/1/2008      | MESS-1    | Cu                   | 0.0025                    | 0.0004      | 25.1                                    | 3.8               | 2                 |
| 2/1/2008      | MESS-1    | Cu                   | 0.0029                    | 0.0004      | 25.1                                    | 3.8               | 2                 |
| 2/1/2008      | MESS-1    | Cu                   | 0.0027                    | 0.0004      | 25.1                                    | 3.8               | 2                 |
| 2/1/2008      | MESS-1    | Cu                   | 0.0016                    | 0.0004      | 25.1                                    | 3.8               | 2                 |
| 2/1/2008      | MESS-1    | Cu                   | 0.0013                    | 0.0004      | 25.1                                    | 3.8               | 2                 |
| 2/1/2008      | MESS-1    | Cu                   | 0.0021                    | 0.0004      | 25.1                                    | 3.8               | 2                 |
| 2/1/2008      | MESS-1    | Cu                   | 0.0025                    | 0.0004      | 25.1                                    | 3.8               | 2                 |
| 2/1/2008      | MESS-1    | Cu                   | 0.0027                    | 0.0004      | 25.1                                    | 3.8               | 2                 |
| 2/1/2008      | NIST-2709 | Cu                   | 0.0027                    | 0.0004      | 34.6                                    | 0.7               | 2                 |
| 2/1/2008      | NIST-2709 | Cu                   | 0.0027                    | 0.0004      | 34.6                                    | 0.7               | 2                 |
| 2/1/2008      | NIST-2709 | Cu                   | 0.0027                    | 0.0004      | 34.6                                    | 0.7               | 2                 |
| 2/1/2008      | NIST-2709 | Cu                   | 0.0030                    | 0.0004      | 34.6                                    | 0.7               | 2                 |
| 2/1/2008      | NIST-2709 | Cu                   | 0.0022                    | 0.0004      | 34.6                                    | 0.7               | 2                 |
| 2/1/2008      | NIST-2704 | Cu                   | 0.0092                    | 0.0005      | 98.6                                    | 5                 | 2                 |
| 2/1/2008      | NIST-2704 | Cu                   | 0.0088                    | 0.0005      | 98.6                                    | 5                 | 2                 |
| 2/1/2008      | NIST-2704 | Cu                   | 0.0087                    | 0.0005      | 98.6                                    | 5                 | 2                 |
| 2/1/2008      | NIST-2704 | Cu                   | 0.0092                    | 0.0005      | 98.6                                    | 5                 | 2                 |
| 2/1/2008      | NIST-2704 | Cu                   | 0.0093                    | 0.0005      | 98.6                                    | 5                 | 2                 |
| 2/1/2008      | SCO-1     | Cu                   | 0.0023                    | 0.0004      | 29                                      | 2                 | 2                 |
| 2/1/2008      | SCO-1     | Cu                   | 0.0027                    | 0.0004      | 29                                      | 2                 | 2                 |
| 2/1/2008      | SCO-1     | Cu                   | 0.0030                    | 0.0004      | 29                                      | 2                 | 2                 |
| 2/1/2008      | SCO-1     | Cu                   | 0.0024                    | 0.0004      | 29                                      | 2                 | 2                 |
| 2/1/2008      | SCO-1     | Cu                   | 0.0030                    | 0.0004      | 29                                      | 2                 | 2                 |
| 2/1/2008      | MAG-1     | Cu                   | 0.0019                    | 0.0004      | 30                                      | 3                 | 2                 |
| 2/1/2008      | MAG-1     | Cu                   | 0.0023                    | 0.0004      | 30                                      | 3                 | 2                 |
| 2/1/2008      | MAG-1     | Cu                   | 0.0021                    | 0.0004      | 30                                      | 3                 | 2                 |
| 2/1/2008      | MAG-1     | Cu                   | 0.0027                    | 0.0005      | 30                                      | 3                 | 2                 |
| 2/1/2008      | MAG-1     | Cu                   | 0.0027                    | 0.0005      | 30                                      | 3                 | 2                 |
| 2/1/2008      | NIST-2711 | Cu                   | 0.0102                    | 0.0005      | 114                                     | 2                 | 2                 |
| 2/1/2008      | NIST-2711 | Cu                   | 0.0106                    | 0.0005      | 114                                     | 2                 | 2                 |
| 2/1/2008      | NIST-2711 | Cu                   | 0.0104                    | 0.0005      | 114                                     | 2                 | 2                 |
| 2/1/2008      | NIST-2711 | Cu                   | 0.0103                    | 0.0005      | 114                                     | 2                 | 2                 |

| Analysis Date | SRM       | Element <sup>A</sup> | FP-XRF                    |             | Standard reference material information |                   |                   |
|---------------|-----------|----------------------|---------------------------|-------------|-----------------------------------------|-------------------|-------------------|
|               |           |                      | signal (cps) <sup>B</sup> | uncertainty | concentration (ppm)                     | uncertainty (ppm) | flag <sup>C</sup> |
| 2/1/2008      | NIST-2711 | Cu                   | 0.0103                    | 0.0005      | 114                                     | 2                 | 2                 |
| 2/1/2008      | NIST-2711 | Cu                   | 0.0101                    | 0.0005      | 114                                     | 2                 | 2                 |
| 2/1/2008      | SDO-1     | Cu                   | 0.0054                    | 0.0005      | 60.2                                    | 9.6               | 2                 |
| 2/1/2008      | SDO-1     | Cu                   | 0.0048                    | 0.0005      | 60.2                                    | 9.6               | 2                 |
| 2/1/2008      | SDO-1     | Cu                   | 0.0041                    | 0.0005      | 60.2                                    | 9.6               | 2                 |
| 2/1/2008      | SDO-1     | Cu                   | 0.0038                    | 0.0005      | 60.2                                    | 9.6               | 2                 |
| 2/1/2008      | SDO-1     | Cu                   | 0.0041                    | 0.0005      | 60.2                                    | 9.6               | 2                 |
| 2/1/2008      | BCSS-1    | Zn                   | 0.0136                    | 0.0004      | 119                                     | 12                | 2                 |
| 2/1/2008      | BCSS-1    | Zn                   | 0.0142                    | 0.0004      | 119                                     | 12                | 2                 |
| 2/1/2008      | BCSS-1    | Zn                   | 0.0148                    | 0.0004      | 119                                     | 12                | 2                 |
| 2/1/2008      | BCSS-1    | Zn                   | 0.0141                    | 0.0004      | 119                                     | 12                | 2                 |
| 2/1/2008      | BCSS-1    | Zn                   | 0.0133                    | 0.0004      | 119                                     | 12                | 2                 |
| 2/1/2008      | MESS-1    | Zn                   | 0.0231                    | 0.0006      | 191                                     | 17                | 2                 |
| 2/1/2008      | MESS-1    | Zn                   | 0.0228                    | 0.0006      | 191                                     | 17                | 2                 |
| 2/1/2008      | MESS-1    | Zn                   | 0.0232                    | 0.0006      | 191                                     | 17                | 2                 |
| 2/1/2008      | MESS-1    | Zn                   | 0.0252                    | 0.0006      | 191                                     | 17                | 2                 |
| 2/1/2008      | MESS-1    | Zn                   | 0.0261                    | 0.0006      | 191                                     | 17                | 2                 |
| 2/1/2008      | MESS-1    | Zn                   | 0.0249                    | 0.0006      | 191                                     | 17                | 2                 |
| 2/1/2008      | MESS-1    | Zn                   | 0.0240                    | 0.0006      | 191                                     | 17                | 2                 |
| 2/1/2008      | MESS-1    | Zn                   | 0.0249                    | 0.0006      | 191                                     | 17                | 2                 |
| 2/1/2008      | NIST-2709 | Zn                   | 0.0133                    | 0.0004      | 106                                     | 3                 | 2                 |
| 2/1/2008      | NIST-2709 | Zn                   | 0.0123                    | 0.0004      | 106                                     | 3                 | 2                 |
| 2/1/2008      | NIST-2709 | Zn                   | 0.0132                    | 0.0004      | 106                                     | 3                 | 2                 |
| 2/1/2008      | NIST-2709 | Zn                   | 0.0129                    | 0.0004      | 106                                     | 3                 | 2                 |
| 2/1/2008      | NIST-2709 | Zn                   | 0.0126                    | 0.0004      | 106                                     | 3                 | 2                 |
| 2/1/2008      | NIST-2704 | Zn                   | 0.0576                    | 0.0010      | 438                                     | 12                | 2                 |
| 2/1/2008      | NIST-2704 | Zn                   | 0.0565                    | 0.0010      | 438                                     | 12                | 2                 |
| 2/1/2008      | NIST-2704 | Zn                   | 0.0583                    | 0.0010      | 438                                     | 12                | 2                 |
| 2/1/2008      | NIST-2704 | Zn                   | 0.0568                    | 0.0009      | 438                                     | 12                | 2                 |
| 2/1/2008      | NIST-2704 | Zn                   | 0.0589                    | 0.0010      | 438                                     | 12                | 2                 |
| 2/1/2008      | SCO-1     | Zn                   | 0.0117                    | 0.0004      | 100                                     | 8                 | 2                 |
| 2/1/2008      | SCO-1     | Zn                   | 0.0126                    | 0.0004      | 100                                     | 8                 | 2                 |
| 2/1/2008      | SCO-1     | Zn                   | 0.0124                    | 0.0004      | 100                                     | 8                 | 2                 |
| 2/1/2008      | SCO-1     | Zn                   | 0.0132                    | 0.0004      | 100                                     | 8                 | 2                 |
| 2/1/2008      | SCO-1     | Zn                   | 0.0127                    | 0.0004      | 100                                     | 8                 | 2                 |



| Analysis Date | SRM       | Element <sup>A</sup> | FP-XRF                    |             | Standard reference material information |                   |                   |
|---------------|-----------|----------------------|---------------------------|-------------|-----------------------------------------|-------------------|-------------------|
|               |           |                      | signal (cps) <sup>B</sup> | uncertainty | concentration (ppm)                     | uncertainty (ppm) | flag <sup>C</sup> |
| 2/1/2008      | MAG-1     | Zn                   | 0.0181                    | 0.0006      | 130                                     | 6                 | 2                 |
| 2/1/2008      | MAG-1     | Zn                   | 0.0160                    | 0.0006      | 130                                     | 6                 | 2                 |
| 2/1/2008      | MAG-1     | Zn                   | 0.0168                    | 0.0006      | 130                                     | 6                 | 2                 |
| 2/1/2008      | MAG-1     | Zn                   | 0.0165                    | 0.0006      | 130                                     | 6                 | 2                 |
| 2/1/2008      | MAG-1     | Zn                   | 0.0165                    | 0.0006      | 130                                     | 6                 | 2                 |
| 2/1/2008      | NIST-2711 | Zn                   | 0.0459                    | 0.0009      | 350.4                                   | 4.8               | 2                 |
| 2/1/2008      | NIST-2711 | Zn                   | 0.0462                    | 0.0009      | 350.4                                   | 4.8               | 2                 |
| 2/1/2008      | NIST-2711 | Zn                   | 0.0451                    | 0.0009      | 350.4                                   | 4.8               | 2                 |
| 2/1/2008      | NIST-2711 | Zn                   | 0.0441                    | 0.0009      | 350.4                                   | 4.8               | 2                 |
| 2/1/2008      | NIST-2711 | Zn                   | 0.0445                    | 0.0009      | 350.4                                   | 4.8               | 2                 |
| 2/1/2008      | NIST-2711 | Zn                   | 0.0472                    | 0.0009      | 350.4                                   | 4.8               | 2                 |
| 2/1/2008      | SDO-1     | Zn                   | 0.0067                    | 0.0004      | 64.1                                    | 6.9               | 2                 |
| 2/1/2008      | SDO-1     | Zn                   | 0.0067                    | 0.0004      | 64.1                                    | 6.9               | 2                 |
| 2/1/2008      | SDO-1     | Zn                   | 0.0064                    | 0.0004      | 64.1                                    | 6.9               | 2                 |
| 2/1/2008      | SDO-1     | Zn                   | 0.0058                    | 0.0004      | 64.1                                    | 6.9               | 2                 |
| 2/1/2008      | SDO-1     | Zn                   | 0.0066                    | 0.0004      | 64.1                                    | 6.9               | 2                 |
| 2/1/2008      | SCO-1     | As                   | 0.0024                    | 0.0005      | 12                                      | 1                 | 2                 |
| 2/1/2008      | SCO-1     | As                   | 0.0027                    | 0.0005      | 12                                      | 1                 | 2                 |
| 2/1/2008      | SCO-1     | As                   | 0.0027                    | 0.0005      | 12                                      | 1                 | 2                 |
| 2/1/2008      | SCO-1     | As                   | 0.0029                    | 0.0005      | 12                                      | 1                 | 2                 |
| 2/1/2008      | SCO-1     | As                   | 0.0032                    | 0.0005      | 12                                      | 1                 | 2                 |
| 2/1/2008      | NIST-2710 | As                   | 0.1512                    | 0.0059      | 626                                     | 38                | 2                 |
| 2/1/2008      | NIST-2710 | As                   | 0.1483                    | 0.0059      | 626                                     | 38                | 2                 |
| 2/1/2008      | NIST-2710 | As                   | 0.1520                    | 0.0059      | 626                                     | 38                | 2                 |
| 2/1/2008      | NIST-2710 | As                   | 0.1432                    | 0.0059      | 626                                     | 38                | 2                 |
| 2/1/2008      | NIST-2710 | As                   | 0.1373                    | 0.0059      | 626                                     | 38                | 2                 |
| 2/1/2008      | MAG-1     | As                   | 0.0024                    | 0.0005      | 9.2                                     | 0.92              | 1                 |
| 2/1/2008      | MAG-1     | As                   | 0.0027                    | 0.0005      | 9.2                                     | 0.92              | 1                 |
| 2/1/2008      | MAG-1     | As                   | 0.0024                    | 0.0005      | 9.2                                     | 0.92              | 1                 |
| 2/1/2008      | MAG-1     | As                   | 0.0027                    | 0.0005      | 9.2                                     | 0.92              | 1                 |
| 2/1/2008      | MAG-1     | As                   | 0.0024                    | 0.0005      | 9.2                                     | 0.92              | 1                 |
| 2/1/2008      | BCSS-1    | As                   | 0.0024                    | 0.0005      | 11.1                                    | 1.4               | 2                 |
| 2/1/2008      | BCSS-1    | As                   | 0.0029                    | 0.0005      | 11.1                                    | 1.4               | 2                 |
| 2/1/2008      | BCSS-1    | As                   | 0.0019                    | 0.0005      | 11.1                                    | 1.4               | 2                 |
| 2/1/2008      | BCSS-1    | As                   | 0.0032                    | 0.0005      | 11.1                                    | 1.4               | 2                 |

| Analysis Date | SRM       | Element <sup>A</sup> | FP-XRF                    |             | Standard reference material information |                   |                   |
|---------------|-----------|----------------------|---------------------------|-------------|-----------------------------------------|-------------------|-------------------|
|               |           |                      | signal (cps) <sup>B</sup> | uncertainty | concentration (ppm)                     | uncertainty (ppm) | flag <sup>C</sup> |
| 2/1/2008      | BCSS-1    | As                   | 0.0035                    | 0.0005      | 11.1                                    | 1.4               | 2                 |
| 2/1/2008      | MESS-1    | As                   | 0.0035                    | 0.0005      | 10.6                                    | 1.2               | 2                 |
| 2/1/2008      | MESS-1    | As                   | 0.0032                    | 0.0005      | 10.6                                    | 1.2               | 2                 |
| 2/1/2008      | MESS-1    | As                   | 0.0032                    | 0.0005      | 10.6                                    | 1.2               | 2                 |
| 2/1/2008      | MESS-1    | As                   | 0.0027                    | 0.0005      | 10.6                                    | 1.2               | 2                 |
| 2/1/2008      | MESS-1    | As                   | 0.0027                    | 0.0005      | 10.6                                    | 1.2               | 2                 |
| 2/1/2008      | MESS-1    | As                   | 0.0016                    | 0.0005      | 10.6                                    | 1.2               | 2                 |
| 2/1/2008      | MESS-1    | As                   | 0.0029                    | 0.0005      | 10.6                                    | 1.2               | 2                 |
| 2/1/2008      | MESS-1    | As                   | 0.0029                    | 0.0005      | 10.6                                    | 1.2               | 2                 |
| 2/1/2008      | NIST-2709 | As                   | 0.0046                    | 0.0005      | 17.7                                    | 0.8               | 2                 |
| 2/1/2008      | NIST-2709 | As                   | 0.0054                    | 0.0005      | 17.7                                    | 0.8               | 2                 |
| 2/1/2008      | NIST-2709 | As                   | 0.0046                    | 0.0005      | 17.7                                    | 0.8               | 2                 |
| 2/1/2008      | NIST-2709 | As                   | 0.0051                    | 0.0005      | 17.7                                    | 0.8               | 2                 |
| 2/1/2008      | NIST-2709 | As                   | 0.0046                    | 0.0005      | 17.7                                    | 0.8               | 2                 |
| 2/1/2008      | NIST-2711 | As                   | 0.0182                    | 0.0024      | 105                                     | 8                 | 2                 |
| 2/1/2008      | NIST-2711 | As                   | 0.0185                    | 0.0024      | 105                                     | 8                 | 2                 |
| 2/1/2008      | NIST-2711 | As                   | 0.0088                    | 0.0024      | 105                                     | 8                 | 2                 |
| 2/1/2008      | NIST-2711 | As                   | 0.0137                    | 0.0024      | 105                                     | 8                 | 2                 |
| 2/1/2008      | NIST-2711 | As                   | 0.0198                    | 0.0024      | 105                                     | 8                 | 2                 |
| 2/1/2008      | NIST-2711 | As                   | 0.0193                    | 0.0024      | 105                                     | 8                 | 2                 |
| 2/1/2008      | NIST-2704 | As                   | 0.0046                    | 0.0011      | 23.4                                    | 0.8               | 2                 |
| 2/1/2008      | NIST-2704 | As                   | 0.0048                    | 0.0011      | 23.4                                    | 0.8               | 2                 |
| 2/1/2008      | NIST-2704 | As                   | 0.0035                    | 0.0011      | 23.4                                    | 0.8               | 2                 |
| 2/1/2008      | NIST-2704 | As                   | 0.0054                    | 0.0011      | 23.4                                    | 0.8               | 2                 |
| 2/1/2008      | NIST-2704 | As                   | 0.0046                    | 0.0011      | 23.4                                    | 0.8               | 2                 |
| 2/1/2008      | SDO-1     | As                   | 0.0209                    | 0.0008      | 68.5                                    | 8.6               | 2                 |
| 2/1/2008      | SDO-1     | As                   | 0.0193                    | 0.0008      | 68.5                                    | 8.6               | 2                 |
| 2/1/2008      | SDO-1     | As                   | 0.0198                    | 0.0008      | 68.5                                    | 8.6               | 2                 |
| 2/1/2008      | SDO-1     | As                   | 0.0185                    | 0.0008      | 68.5                                    | 8.6               | 2                 |
| 2/1/2008      | SDO-1     | As                   | 0.0204                    | 0.0008      | 68.5                                    | 8.6               | 2                 |
| 2/1/2008      | NIST-2710 | Br                   | 0.0086                    | 0.0013      | 6                                       | 0.6               | 1                 |
| 2/1/2008      | NIST-2710 | Br                   | 0.0073                    | 0.0013      | 6                                       | 0.6               | 1                 |
| 2/1/2008      | NIST-2710 | Br                   | 0.0056                    | 0.0013      | 6                                       | 0.6               | 1                 |
| 2/1/2008      | NIST-2710 | Br                   | 0.0069                    | 0.0013      | 6                                       | 0.6               | 1                 |
| 2/1/2008      | MAG-1     | Br                   | 0.1081                    | 0.0013      | 250                                     | 25                | 1                 |

| Analysis Date | SRM       | Element <sup>A</sup> | FP-XRF                    |             | Standard reference material information |                   |                   |
|---------------|-----------|----------------------|---------------------------|-------------|-----------------------------------------|-------------------|-------------------|
|               |           |                      | signal (cps) <sup>B</sup> | uncertainty | concentration (ppm)                     | uncertainty (ppm) | flag <sup>C</sup> |
| 2/1/2008      | MAG-1     | Br                   | 0.1085                    | 0.0013      | 250                                     | 25                | 1                 |
| 2/1/2008      | MAG-1     | Br                   | 0.1102                    | 0.0013      | 250                                     | 25                | 1                 |
| 2/1/2008      | MAG-1     | Br                   | 0.1094                    | 0.0013      | 250                                     | 25                | 1                 |
| 2/1/2008      | MAG-1     | Br                   | 0.1120                    | 0.0013      | 250                                     | 25                | 1                 |
| 2/1/2008      | NIST-2711 | Br                   | 0.0030                    | 0.0004      | 5                                       | 0.5               | 1                 |
| 2/1/2008      | NIST-2711 | Br                   | 0.0030                    | 0.0004      | 5                                       | 0.5               | 1                 |
| 2/1/2008      | NIST-2711 | Br                   | 0.0048                    | 0.0004      | 5                                       | 0.5               | 1                 |
| 2/1/2008      | NIST-2711 | Br                   | 0.0043                    | 0.0004      | 5                                       | 0.5               | 1                 |
| 2/1/2008      | NIST-2711 | Br                   | 0.0030                    | 0.0004      | 5                                       | 0.5               | 1                 |
| 2/1/2008      | NIST-2711 | Br                   | 0.0043                    | 0.0004      | 5                                       | 0.5               | 1                 |
| 2/1/2008      | NIST-2704 | Br                   | 0.0030                    | 0.0004      | 7                                       | 0.7               | 1                 |
| 2/1/2008      | NIST-2704 | Br                   | 0.0026                    | 0.0004      | 7                                       | 0.7               | 1                 |
| 2/1/2008      | NIST-2704 | Br                   | 0.0035                    | 0.0004      | 7                                       | 0.7               | 1                 |
| 2/1/2008      | NIST-2704 | Br                   | 0.0030                    | 0.0004      | 7                                       | 0.7               | 1                 |
| 2/1/2008      | NIST-2704 | Br                   | 0.0035                    | 0.0004      | 7                                       | 0.7               | 1                 |
| 2/1/2008      | SCO-1     | Rb                   | 0.0727                    | 0.0014      | 110                                     | 4                 | 2                 |
| 2/1/2008      | SCO-1     | Rb                   | 0.0755                    | 0.0014      | 110                                     | 4                 | 2                 |
| 2/1/2008      | SCO-1     | Rb                   | 0.0734                    | 0.0014      | 110                                     | 4                 | 2                 |
| 2/1/2008      | SCO-1     | Rb                   | 0.0734                    | 0.0014      | 110                                     | 4                 | 2                 |
| 2/1/2008      | SCO-1     | Rb                   | 0.0713                    | 0.0014      | 110                                     | 4                 | 2                 |
| 2/1/2008      | NIST-2710 | Rb                   | 0.0840                    | 0.0021      | 120                                     | 12                | 1                 |
| 2/1/2008      | NIST-2710 | Rb                   | 0.0819                    | 0.0021      | 120                                     | 12                | 1                 |
| 2/1/2008      | NIST-2710 | Rb                   | 0.0805                    | 0.0021      | 120                                     | 12                | 1                 |
| 2/1/2008      | NIST-2710 | Rb                   | 0.0847                    | 0.0021      | 120                                     | 12                | 1                 |
| 2/1/2008      | NIST-2710 | Rb                   | 0.0833                    | 0.0021      | 120                                     | 12                | 1                 |
| 2/1/2008      | MAG-1     | Rb                   | 0.0974                    | 0.0014      | 150                                     | 6                 | 2                 |
| 2/1/2008      | MAG-1     | Rb                   | 0.0967                    | 0.0014      | 150                                     | 6                 | 2                 |
| 2/1/2008      | MAG-1     | Rb                   | 0.0946                    | 0.0014      | 150                                     | 6                 | 2                 |
| 2/1/2008      | MAG-1     | Rb                   | 0.0967                    | 0.0014      | 150                                     | 6                 | 2                 |
| 2/1/2008      | MAG-1     | Rb                   | 0.0953                    | 0.0014      | 150                                     | 6                 | 2                 |
| 2/1/2008      | NIST-2709 | Rb                   | 0.0607                    | 0.0014      | 96                                      | 9.6               | 1                 |
| 2/1/2008      | NIST-2709 | Rb                   | 0.0600                    | 0.0014      | 96                                      | 9.6               | 1                 |
| 2/1/2008      | NIST-2709 | Rb                   | 0.0593                    | 0.0014      | 96                                      | 9.6               | 1                 |
| 2/1/2008      | NIST-2709 | Rb                   | 0.0586                    | 0.0014      | 96                                      | 9.6               | 1                 |
| 2/1/2008      | NIST-2709 | Rb                   | 0.0593                    | 0.0014      | 96                                      | 9.6               | 1                 |

| Analysis Date | SRM       | Element <sup>A</sup> | FP-XRF                    |             | Standard reference material information |                   |                   |
|---------------|-----------|----------------------|---------------------------|-------------|-----------------------------------------|-------------------|-------------------|
|               |           |                      | signal (cps) <sup>B</sup> | uncertainty | concentration (ppm)                     | uncertainty (ppm) | flag <sup>C</sup> |
| 2/1/2008      | NIST-2711 | Rb                   | 0.0727                    | 0.0014      | 110                                     | 11                | 1                 |
| 2/1/2008      | NIST-2711 | Rb                   | 0.0755                    | 0.0014      | 110                                     | 11                | 1                 |
| 2/1/2008      | NIST-2711 | Rb                   | 0.0770                    | 0.0014      | 110                                     | 11                | 1                 |
| 2/1/2008      | NIST-2711 | Rb                   | 0.0734                    | 0.0014      | 110                                     | 11                | 1                 |
| 2/1/2008      | NIST-2711 | Rb                   | 0.0748                    | 0.0014      | 110                                     | 11                | 1                 |
| 2/1/2008      | NIST-2711 | Rb                   | 0.0763                    | 0.0014      | 110                                     | 11                | 1                 |
| 2/1/2008      | NIST-2704 | Rb                   | 0.0657                    | 0.0014      | 100                                     | 10                | 1                 |
| 2/1/2008      | NIST-2704 | Rb                   | 0.0678                    | 0.0014      | 100                                     | 10                | 1                 |
| 2/1/2008      | NIST-2704 | Rb                   | 0.0678                    | 0.0014      | 100                                     | 10                | 1                 |
| 2/1/2008      | NIST-2704 | Rb                   | 0.0650                    | 0.0014      | 100                                     | 10                | 1                 |
| 2/1/2008      | NIST-2704 | Rb                   | 0.0671                    | 0.0014      | 100                                     | 10                | 1                 |
| 2/1/2008      | SDO-1     | Rb                   | 0.0812                    | 0.0014      | 126                                     | 3.9               | 2                 |
| 2/1/2008      | SDO-1     | Rb                   | 0.0791                    | 0.0014      | 126                                     | 3.9               | 2                 |
| 2/1/2008      | SDO-1     | Rb                   | 0.0798                    | 0.0014      | 126                                     | 3.9               | 2                 |
| 2/1/2008      | SDO-1     | Rb                   | 0.0791                    | 0.0014      | 126                                     | 3.9               | 2                 |
| 2/1/2008      | SDO-1     | Rb                   | 0.0791                    | 0.0014      | 126                                     | 3.9               | 2                 |
| 2/1/2008      | SCO-1     | Sr                   | 0.1269                    | 0.0016      | 170                                     | 16                | 2                 |
| 2/1/2008      | SCO-1     | Sr                   | 0.1277                    | 0.0016      | 170                                     | 16                | 2                 |
| 2/1/2008      | SCO-1     | Sr                   | 0.1262                    | 0.0016      | 170                                     | 16                | 2                 |
| 2/1/2008      | SCO-1     | Sr                   | 0.1277                    | 0.0016      | 170                                     | 16                | 2                 |
| 2/1/2008      | SCO-1     | Sr                   | 0.1262                    | 0.0016      | 170                                     | 16                | 2                 |
| 2/1/2008      | NIST-2710 | Sr                   | 0.2547                    | 0.0024      | 330                                     | 33                | 1                 |
| 2/1/2008      | NIST-2710 | Sr                   | 0.2570                    | 0.0024      | 330                                     | 33                | 1                 |
| 2/1/2008      | NIST-2710 | Sr                   | 0.2562                    | 0.0024      | 330                                     | 33                | 1                 |
| 2/1/2008      | NIST-2710 | Sr                   | 0.2586                    | 0.0024      | 330                                     | 33                | 1                 |
| 2/1/2008      | NIST-2710 | Sr                   | 0.2570                    | 0.0024      | 330                                     | 33                | 1                 |
| 2/1/2008      | MAG-1     | Sr                   | 0.1066                    | 0.0016      | 150                                     | 15                | 2                 |
| 2/1/2008      | MAG-1     | Sr                   | 0.1034                    | 0.0016      | 150                                     | 15                | 2                 |
| 2/1/2008      | MAG-1     | Sr                   | 0.1105                    | 0.0016      | 150                                     | 15                | 2                 |
| 2/1/2008      | MAG-1     | Sr                   | 0.1089                    | 0.0016      | 150                                     | 15                | 2                 |
| 2/1/2008      | MAG-1     | Sr                   | 0.1097                    | 0.0016      | 150                                     | 15                | 2                 |
| 2/1/2008      | BCSS-1    | Sr                   | 0.0768                    | 0.0008      | 96                                      | 9.6               | 1                 |
| 2/1/2008      | BCSS-1    | Sr                   | 0.0776                    | 0.0008      | 96                                      | 9.6               | 1                 |
| 2/1/2008      | BCSS-1    | Sr                   | 0.0776                    | 0.0008      | 96                                      | 9.6               | 1                 |
| 2/1/2008      | BCSS-1    | Sr                   | 0.0768                    | 0.0008      | 96                                      | 9.6               | 1                 |

| Analysis Date | SRM       | Element <sup>A</sup> | FP-XRF                    |             | Standard reference material information |                   |                   |
|---------------|-----------|----------------------|---------------------------|-------------|-----------------------------------------|-------------------|-------------------|
|               |           |                      | signal (cps) <sup>B</sup> | uncertainty | concentration (ppm)                     | uncertainty (ppm) | flag <sup>C</sup> |
| 2/1/2008      | BCSS-1    | Sr                   | 0.0776                    | 0.0008      | 96                                      | 9.6               | 1                 |
| 2/1/2008      | MESS-1    | Sr                   | 0.0713                    | 0.0008      | 89                                      | 8.9               | 1                 |
| 2/1/2008      | MESS-1    | Sr                   | 0.0697                    | 0.0008      | 89                                      | 8.9               | 1                 |
| 2/1/2008      | MESS-1    | Sr                   | 0.0705                    | 0.0008      | 89                                      | 8.9               | 1                 |
| 2/1/2008      | MESS-1    | Sr                   | 0.0729                    | 0.0008      | 89                                      | 8.9               | 1                 |
| 2/1/2008      | MESS-1    | Sr                   | 0.0721                    | 0.0008      | 89                                      | 8.9               | 1                 |
| 2/1/2008      | MESS-1    | Sr                   | 0.0705                    | 0.0008      | 89                                      | 8.9               | 1                 |
| 2/1/2008      | MESS-1    | Sr                   | 0.0690                    | 0.0008      | 89                                      | 8.9               | 1                 |
| 2/1/2008      | MESS-1    | Sr                   | 0.0713                    | 0.0008      | 89                                      | 8.9               | 1                 |
| 2/1/2008      | NIST-2709 | Sr                   | 0.1685                    | 0.0016      | 231                                     | 2                 | 2                 |
| 2/1/2008      | NIST-2709 | Sr                   | 0.1693                    | 0.0016      | 231                                     | 2                 | 2                 |
| 2/1/2008      | NIST-2709 | Sr                   | 0.1685                    | 0.0016      | 231                                     | 2                 | 2                 |
| 2/1/2008      | NIST-2709 | Sr                   | 0.1716                    | 0.0016      | 231                                     | 2                 | 2                 |
| 2/1/2008      | NIST-2709 | Sr                   | 0.1693                    | 0.0016      | 231                                     | 2                 | 2                 |
| 2/1/2008      | NIST-2711 | Sr                   | 0.1865                    | 0.0016      | 245.3                                   | 0.7               | 2                 |
| 2/1/2008      | NIST-2711 | Sr                   | 0.1888                    | 0.0016      | 245.3                                   | 0.7               | 2                 |
| 2/1/2008      | NIST-2711 | Sr                   | 0.1849                    | 0.0016      | 245.3                                   | 0.7               | 2                 |
| 2/1/2008      | NIST-2711 | Sr                   | 0.1873                    | 0.0016      | 245.3                                   | 0.7               | 2                 |
| 2/1/2008      | NIST-2711 | Sr                   | 0.1794                    | 0.0016      | 245.3                                   | 0.7               | 2                 |
| 2/1/2008      | NIST-2711 | Sr                   | 0.1873                    | 0.0016      | 245.3                                   | 0.7               | 2                 |
| 2/1/2008      | NIST-2704 | Sr                   | 0.1027                    | 0.0016      | 130                                     | 13                | 1                 |
| 2/1/2008      | NIST-2704 | Sr                   | 0.1011                    | 0.0016      | 130                                     | 13                | 1                 |
| 2/1/2008      | NIST-2704 | Sr                   | 0.1011                    | 0.0016      | 130                                     | 13                | 1                 |
| 2/1/2008      | NIST-2704 | Sr                   | 0.1011                    | 0.0016      | 130                                     | 13                | 1                 |
| 2/1/2008      | NIST-2704 | Sr                   | 0.1027                    | 0.0016      | 130                                     | 13                | 1                 |
| 2/1/2008      | SDO-1     | Sr                   | 0.0564                    | 0.0008      | 75.1                                    | 11                | 2                 |
| 2/1/2008      | SDO-1     | Sr                   | 0.0564                    | 0.0008      | 75.1                                    | 11                | 2                 |
| 2/1/2008      | SDO-1     | Sr                   | 0.0549                    | 0.0008      | 75.1                                    | 11                | 2                 |
| 2/1/2008      | SDO-1     | Sr                   | 0.0549                    | 0.0008      | 75.1                                    | 11                | 2                 |
| 2/1/2008      | SDO-1     | Sr                   | 0.0525                    | 0.0008      | 75.1                                    | 11                | 2                 |
| 2/1/2008      | SCO-1     | Zr                   | 0.1788                    | 0.0023      | 160                                     | 30                | 2                 |
| 2/1/2008      | SCO-1     | Zr                   | 0.1788                    | 0.0023      | 160                                     | 30                | 2                 |
| 2/1/2008      | SCO-1     | Zr                   | 0.1765                    | 0.0023      | 160                                     | 30                | 2                 |
| 2/1/2008      | SCO-1     | Zr                   | 0.1800                    | 0.0023      | 160                                     | 30                | 2                 |
| 2/1/2008      | SCO-1     | Zr                   | 0.1800                    | 0.0023      | 160                                     | 30                | 2                 |

| Analysis Date | SRM       | Element <sup>A</sup> | FP-XRF                    |             | Standard reference material information |                   |                   |
|---------------|-----------|----------------------|---------------------------|-------------|-----------------------------------------|-------------------|-------------------|
|               |           |                      | signal (cps) <sup>B</sup> | uncertainty | concentration (ppm)                     | uncertainty (ppm) | flag <sup>C</sup> |
| 2/1/2008      | MAG-1     | Zr                   | 0.1309                    | 0.0023      | 130                                     | 13                | 2                 |
| 2/1/2008      | MAG-1     | Zr                   | 0.1297                    | 0.0023      | 130                                     | 13                | 2                 |
| 2/1/2008      | MAG-1     | Zr                   | 0.1321                    | 0.0023      | 130                                     | 13                | 2                 |
| 2/1/2008      | MAG-1     | Zr                   | 0.1286                    | 0.0023      | 130                                     | 13                | 2                 |
| 2/1/2008      | MAG-1     | Zr                   | 0.1309                    | 0.0023      | 130                                     | 13                | 2                 |
| 2/1/2008      | NIST-2709 | Zr                   | 0.1368                    | 0.0023      | 160                                     | 16                | 1                 |
| 2/1/2008      | NIST-2709 | Zr                   | 0.1333                    | 0.0023      | 160                                     | 16                | 1                 |
| 2/1/2008      | NIST-2709 | Zr                   | 0.1368                    | 0.0023      | 160                                     | 16                | 1                 |
| 2/1/2008      | NIST-2709 | Zr                   | 0.1344                    | 0.0023      | 160                                     | 16                | 1                 |
| 2/1/2008      | NIST-2709 | Zr                   | 0.1309                    | 0.0023      | 160                                     | 16                | 1                 |
| 2/1/2008      | NIST-2711 | Zr                   | 0.2665                    | 0.0023      | 230                                     | 23                | 1                 |
| 2/1/2008      | NIST-2711 | Zr                   | 0.2677                    | 0.0023      | 230                                     | 23                | 1                 |
| 2/1/2008      | NIST-2711 | Zr                   | 0.2677                    | 0.0023      | 230                                     | 23                | 1                 |
| 2/1/2008      | NIST-2711 | Zr                   | 0.2688                    | 0.0023      | 230                                     | 23                | 1                 |
| 2/1/2008      | NIST-2711 | Zr                   | 0.2653                    | 0.0023      | 230                                     | 23                | 1                 |
| 2/1/2008      | NIST-2711 | Zr                   | 0.2677                    | 0.0023      | 230                                     | 23                | 1                 |
| 2/1/2008      | NIST-2704 | Zr                   | 0.3063                    | 0.0023      | 300                                     | 30                | 1                 |
| 2/1/2008      | NIST-2704 | Zr                   | 0.3016                    | 0.0023      | 300                                     | 30                | 1                 |
| 2/1/2008      | NIST-2704 | Zr                   | 0.2946                    | 0.0023      | 300                                     | 30                | 1                 |
| 2/1/2008      | NIST-2704 | Zr                   | 0.3051                    | 0.0023      | 300                                     | 30                | 1                 |
| 2/1/2008      | NIST-2704 | Zr                   | 0.3016                    | 0.0023      | 300                                     | 30                | 1                 |
| 2/1/2008      | SDO-1     | Zr                   | 0.1648                    | 0.0023      | 165                                     | 24                | 2                 |
| 2/1/2008      | SDO-1     | Zr                   | 0.1625                    | 0.0023      | 165                                     | 24                | 2                 |
| 2/1/2008      | SDO-1     | Zr                   | 0.1601                    | 0.0023      | 165                                     | 24                | 2                 |
| 2/1/2008      | SDO-1     | Zr                   | 0.1601                    | 0.0023      | 165                                     | 24                | 2                 |
| 2/1/2008      | SDO-1     | Zr                   | 0.1590                    | 0.0023      | 165                                     | 24                | 2                 |
| 2/1/2008      | NIST-2710 | Mo                   | 0.0174                    | 0.0025      | 19                                      | 1.9               | 1                 |
| 2/1/2008      | NIST-2710 | Mo                   | 0.0186                    | 0.0025      | 19                                      | 1.9               | 1                 |
| 2/1/2008      | NIST-2710 | Mo                   | 0.0186                    | 0.0025      | 19                                      | 1.9               | 1                 |
| 2/1/2008      | NIST-2710 | Mo                   | 0.0149                    | 0.0025      | 19                                      | 1.9               | 1                 |
| 2/1/2008      | NIST-2710 | Mo                   | 0.0174                    | 0.0025      | 19                                      | 1.9               | 1                 |
| 2/1/2008      | MESS-1    | Mo                   | 0.0075                    | 0.0025      | 2.2                                     | 0.22              | 1                 |
| 2/1/2008      | MESS-1    | Mo                   | 0.0075                    | 0.0025      | 2.2                                     | 0.22              | 1                 |
| 2/1/2008      | MESS-1    | Mo                   | 0.0062                    | 0.0012      | 2.2                                     | 0.22              | 1                 |
| 2/1/2008      | MESS-1    | Mo                   | 0.0062                    | 0.0025      | 2.2                                     | 0.22              | 1                 |

| Analysis Date | SRM       | Element <sup>A</sup> | FP-XRF                    |             | Standard reference material information |                   |                   |
|---------------|-----------|----------------------|---------------------------|-------------|-----------------------------------------|-------------------|-------------------|
|               |           |                      | signal (cps) <sup>B</sup> | uncertainty | concentration (ppm)                     | uncertainty (ppm) | flag <sup>C</sup> |
| 2/1/2008      | SDO-1     | Mo                   | 0.1578                    | 0.0025      | 134                                     | 21                | 2                 |
| 2/1/2008      | SDO-1     | Mo                   | 0.1578                    | 0.0025      | 134                                     | 21                | 2                 |
| 2/1/2008      | SDO-1     | Mo                   | 0.1602                    | 0.0025      | 134                                     | 21                | 2                 |
| 2/1/2008      | SDO-1     | Mo                   | 0.1553                    | 0.0025      | 134                                     | 21                | 2                 |
| 2/1/2008      | SDO-1     | Mo                   | 0.1553                    | 0.0025      | 134                                     | 21                | 2                 |
| 2/1/2008      | NIST-2710 | Cd                   | 0.0150                    | 0.0042      | 21.8                                    | 0.2               | 2                 |
| 2/1/2008      | NIST-2710 | Cd                   | 0.0126                    | 0.0042      | 21.8                                    | 0.2               | 2                 |
| 2/1/2008      | NIST-2710 | Cd                   | 0.0162                    | 0.0042      | 21.8                                    | 0.2               | 2                 |
| 2/1/2008      | BCSS-1    | Cd                   | 0.0111                    | 0.0036      | 0.25                                    | 0.04              | 2                 |
| 2/1/2008      | NIST-2711 | Cd                   | 0.0123                    | 0.0036      | 41.7                                    | 0.25              | 2                 |
| 2/1/2008      | NIST-2711 | Cd                   | 0.0204                    | 0.0036      | 41.7                                    | 0.25              | 2                 |
| 2/1/2008      | NIST-2711 | Cd                   | 0.0186                    | 0.0036      | 41.7                                    | 0.25              | 2                 |
| 2/1/2008      | NIST-2711 | Cd                   | 0.0156                    | 0.0036      | 41.7                                    | 0.25              | 2                 |
| 2/1/2008      | NIST-2711 | Cd                   | 0.0177                    | 0.0036      | 41.7                                    | 0.25              | 2                 |
| 2/1/2008      | NIST-2711 | Cd                   | 0.0171                    | 0.0036      | 41.7                                    | 0.25              | 2                 |
| 2/1/2008      | SCO-1     | Ba                   | 0.0718                    | 0.0042      | 570                                     | 30                | 2                 |
| 2/1/2008      | SCO-1     | Ba                   | 0.0772                    | 0.0044      | 570                                     | 30                | 2                 |
| 2/1/2008      | SCO-1     | Ba                   | 0.0760                    | 0.0042      | 570                                     | 30                | 2                 |
| 2/1/2008      | SCO-1     | Ba                   | 0.0785                    | 0.0044      | 570                                     | 30                | 2                 |
| 2/1/2008      | SCO-1     | Ba                   | 0.0749                    | 0.0044      | 570                                     | 30                | 2                 |
| 2/1/2008      | NIST-2710 | Ba                   | 0.0833                    | 0.0050      | 707                                     | 51                | 2                 |
| 2/1/2008      | NIST-2710 | Ba                   | 0.0795                    | 0.0050      | 707                                     | 51                | 2                 |
| 2/1/2008      | NIST-2710 | Ba                   | 0.0888                    | 0.0050      | 707                                     | 51                | 2                 |
| 2/1/2008      | NIST-2710 | Ba                   | 0.0793                    | 0.0050      | 707                                     | 51                | 2                 |
| 2/1/2008      | NIST-2710 | Ba                   | 0.0881                    | 0.0050      | 707                                     | 51                | 2                 |
| 2/1/2008      | MAG-1     | Ba                   | 0.0825                    | 0.0052      | 480                                     | 41                | 2                 |
| 2/1/2008      | MAG-1     | Ba                   | 0.0848                    | 0.0052      | 480                                     | 41                | 2                 |
| 2/1/2008      | MAG-1     | Ba                   | 0.0789                    | 0.0052      | 480                                     | 41                | 2                 |
| 2/1/2008      | MAG-1     | Ba                   | 0.0871                    | 0.0052      | 480                                     | 41                | 2                 |
| 2/1/2008      | MAG-1     | Ba                   | 0.0908                    | 0.0054      | 480                                     | 41                | 2                 |
| 2/1/2008      | NIST-2709 | Ba                   | 0.0768                    | 0.0044      | 968                                     | 40                | 2                 |
| 2/1/2008      | NIST-2709 | Ba                   | 0.0839                    | 0.0044      | 968                                     | 40                | 2                 |
| 2/1/2008      | NIST-2709 | Ba                   | 0.0787                    | 0.0044      | 968                                     | 40                | 2                 |
| 2/1/2008      | NIST-2709 | Ba                   | 0.0796                    | 0.0044      | 968                                     | 40                | 2                 |
| 2/1/2008      | NIST-2709 | Ba                   | 0.0875                    | 0.0044      | 968                                     | 40                | 2                 |

| Analysis Date | SRM       | Element <sup>A</sup> | FP-XRF                    |             | Standard reference material information |                   |                   |
|---------------|-----------|----------------------|---------------------------|-------------|-----------------------------------------|-------------------|-------------------|
|               |           |                      | signal (cps) <sup>B</sup> | uncertainty | concentration (ppm)                     | uncertainty (ppm) | flag <sup>C</sup> |
| 2/1/2008      | NIST-2711 | Ba                   | 0.0682                    | 0.0040      | 726                                     | 38                | 2                 |
| 2/1/2008      | NIST-2711 | Ba                   | 0.0638                    | 0.0038      | 726                                     | 38                | 2                 |
| 2/1/2008      | NIST-2711 | Ba                   | 0.0638                    | 0.0040      | 726                                     | 38                | 2                 |
| 2/1/2008      | NIST-2711 | Ba                   | 0.0653                    | 0.0040      | 726                                     | 38                | 2                 |
| 2/1/2008      | NIST-2711 | Ba                   | 0.0632                    | 0.0040      | 726                                     | 38                | 2                 |
| 2/1/2008      | NIST-2711 | Ba                   | 0.0670                    | 0.0040      | 726                                     | 38                | 2                 |
| 2/1/2008      | NIST-2704 | Ba                   | 0.0620                    | 0.0048      | 414                                     | 12                | 2                 |
| 2/1/2008      | NIST-2704 | Ba                   | 0.0729                    | 0.0050      | 414                                     | 12                | 2                 |
| 2/1/2008      | NIST-2704 | Ba                   | 0.0588                    | 0.0048      | 414                                     | 12                | 2                 |
| 2/1/2008      | NIST-2704 | Ba                   | 0.0617                    | 0.0048      | 414                                     | 12                | 2                 |
| 2/1/2008      | NIST-2704 | Ba                   | 0.0678                    | 0.0048      | 414                                     | 12                | 2                 |
| 2/1/2008      | SDO-1     | Ba                   | 0.0927                    | 0.0056      | 397                                     | 38                | 2                 |
| 2/1/2008      | SDO-1     | Ba                   | 0.0814                    | 0.0057      | 397                                     | 38                | 2                 |
| 2/1/2008      | SDO-1     | Ba                   | 0.0888                    | 0.0057      | 397                                     | 38                | 2                 |
| 2/1/2008      | SDO-1     | Ba                   | 0.0751                    | 0.0056      | 397                                     | 38                | 2                 |
| 2/1/2008      | SDO-1     | Ba                   | 0.0955                    | 0.0056      | 397                                     | 38                | 2                 |
| 2/1/2008      | NIST-2710 | Hg                   | 0.0109                    | 0.0008      | 32.6                                    | 1.8               | 2                 |
| 2/1/2008      | NIST-2710 | Hg                   | 0.0084                    | 0.0007      | 32.6                                    | 1.8               | 2                 |
| 2/1/2008      | NIST-2710 | Hg                   | 0.0101                    | 0.0008      | 32.6                                    | 1.8               | 2                 |
| 2/1/2008      | NIST-2710 | Hg                   | 0.0100                    | 0.0008      | 32.6                                    | 1.8               | 2                 |
| 2/1/2008      | NIST-2710 | Hg                   | 0.0112                    | 0.0008      | 32.6                                    | 1.8               | 2                 |
| 2/1/2008      | MAG-1     | Hg                   | 0.0008                    | 0.0003      | 0.02                                    | 0.002             | 1                 |
| 2/1/2008      | MAG-1     | Hg                   | 0.0009                    | 0.0003      | 0.02                                    | 0.002             | 1                 |
| 2/1/2008      | MAG-1     | Hg                   | 0.0008                    | 0.0003      | 0.02                                    | 0.002             | 1                 |
| 2/1/2008      | MAG-1     | Hg                   | 0.0009                    | 0.0003      | 0.02                                    | 0.002             | 1                 |
| 2/1/2008      | NIST-2709 | Hg                   | 0.0011                    | 0.0003      | 1.4                                     | 0.08              | 2                 |
| 2/1/2008      | NIST-2709 | Hg                   | 0.0011                    | 0.0003      | 1.4                                     | 0.08              | 2                 |
| 2/1/2008      | NIST-2709 | Hg                   | 0.0007                    | 0.0003      | 1.4                                     | 0.08              | 2                 |
| 2/1/2008      | NIST-2709 | Hg                   | 0.0009                    | 0.0003      | 1.4                                     | 0.08              | 2                 |
| 2/1/2008      | NIST-2711 | Hg                   | 0.0016                    | 0.0003      | 6.25                                    | 0.19              | 2                 |
| 2/1/2008      | NIST-2711 | Hg                   | 0.0017                    | 0.0003      | 6.25                                    | 0.19              | 2                 |
| 2/1/2008      | NIST-2711 | Hg                   | 0.0016                    | 0.0003      | 6.25                                    | 0.19              | 2                 |
| 2/1/2008      | NIST-2711 | Hg                   | 0.0017                    | 0.0003      | 6.25                                    | 0.19              | 2                 |
| 2/1/2008      | NIST-2711 | Hg                   | 0.0020                    | 0.0003      | 6.25                                    | 0.19              | 2                 |
| 2/1/2008      | NIST-2711 | Hg                   | 0.0016                    | 0.0003      | 6.25                                    | 0.19              | 2                 |



| Analysis Date | SRM       | Element <sup>A</sup> | FP-XRF                    |             | Standard reference material information |                   |                   |
|---------------|-----------|----------------------|---------------------------|-------------|-----------------------------------------|-------------------|-------------------|
|               |           |                      | signal (cps) <sup>B</sup> | uncertainty | concentration (ppm)                     | uncertainty (ppm) | flag <sup>C</sup> |
| 2/1/2008      | NIST-2704 | Hg                   | 0.0012                    | 0.0003      | 1.44                                    | 0.07              | 2                 |
| 2/1/2008      | NIST-2704 | Hg                   | 0.0012                    | 0.0003      | 1.44                                    | 0.07              | 2                 |
| 2/1/2008      | NIST-2704 | Hg                   | 0.0009                    | 0.0003      | 1.44                                    | 0.07              | 2                 |
| 2/1/2008      | NIST-2704 | Hg                   | 0.0009                    | 0.0003      | 1.44                                    | 0.07              | 2                 |
| 2/1/2008      | SDO-1     | Hg                   | 0.0009                    | 0.0003      | 0.19                                    | 0.08              | 2                 |
| 2/1/2008      | SDO-1     | Hg                   | 0.0008                    | 0.0003      | 0.19                                    | 0.08              | 2                 |
| 2/1/2008      | SDO-1     | Hg                   | 0.0009                    | 0.0003      | 0.19                                    | 0.08              | 2                 |
| 2/1/2008      | BCSS-1    | Pb                   | 0.0050                    | 0.0004      | 22.7                                    | 3.4               | 2                 |
| 2/1/2008      | BCSS-1    | Pb                   | 0.0047                    | 0.0004      | 22.7                                    | 3.4               | 2                 |
| 2/1/2008      | BCSS-1    | Pb                   | 0.0052                    | 0.0004      | 22.7                                    | 3.4               | 2                 |
| 2/1/2008      | BCSS-1    | Pb                   | 0.0037                    | 0.0004      | 22.7                                    | 3.4               | 2                 |
| 2/1/2008      | BCSS-1    | Pb                   | 0.0039                    | 0.0004      | 22.7                                    | 3.4               | 2                 |
| 2/1/2008      | MESS-1    | Pb                   | 0.0056                    | 0.0004      | 34                                      | 6.1               | 2                 |
| 2/1/2008      | MESS-1    | Pb                   | 0.0058                    | 0.0004      | 34                                      | 6.1               | 2                 |
| 2/1/2008      | MESS-1    | Pb                   | 0.0058                    | 0.0004      | 34                                      | 6.1               | 2                 |
| 2/1/2008      | MESS-1    | Pb                   | 0.0067                    | 0.0004      | 34                                      | 6.1               | 2                 |
| 2/1/2008      | MESS-1    | Pb                   | 0.0073                    | 0.0004      | 34                                      | 6.1               | 2                 |
| 2/1/2008      | MESS-1    | Pb                   | 0.0069                    | 0.0004      | 34                                      | 6.1               | 2                 |
| 2/1/2008      | MESS-1    | Pb                   | 0.0065                    | 0.0004      | 34                                      | 6.1               | 2                 |
| 2/1/2008      | MESS-1    | Pb                   | 0.0065                    | 0.0004      | 34                                      | 6.1               | 2                 |
| 2/1/2008      | NIST-2709 | Pb                   | 0.0035                    | 0.0004      | 18.9                                    | 0.5               | 2                 |
| 2/1/2008      | NIST-2709 | Pb                   | 0.0024                    | 0.0004      | 18.9                                    | 0.5               | 2                 |
| 2/1/2008      | NIST-2709 | Pb                   | 0.0032                    | 0.0004      | 18.9                                    | 0.5               | 2                 |
| 2/1/2008      | NIST-2709 | Pb                   | 0.0030                    | 0.0004      | 18.9                                    | 0.5               | 2                 |
| 2/1/2008      | NIST-2709 | Pb                   | 0.0035                    | 0.0004      | 18.9                                    | 0.5               | 2                 |
| 2/1/2008      | NIST-2704 | Pb                   | 0.0317                    | 0.0009      | 161                                     | 17                | 2                 |
| 2/1/2008      | NIST-2704 | Pb                   | 0.0307                    | 0.0009      | 161                                     | 17                | 2                 |
| 2/1/2008      | NIST-2704 | Pb                   | 0.0313                    | 0.0009      | 161                                     | 17                | 2                 |
| 2/1/2008      | NIST-2704 | Pb                   | 0.0304                    | 0.0009      | 161                                     | 17                | 2                 |
| 2/1/2008      | NIST-2704 | Pb                   | 0.0317                    | 0.0009      | 161                                     | 17                | 2                 |
| 2/1/2008      | SCO-1     | Pb                   | 0.0063                    | 0.0004      | 31                                      | 3                 | 2                 |
| 2/1/2008      | SCO-1     | Pb                   | 0.0060                    | 0.0004      | 31                                      | 3                 | 2                 |
| 2/1/2008      | SCO-1     | Pb                   | 0.0054                    | 0.0004      | 31                                      | 3                 | 2                 |
| 2/1/2008      | SCO-1     | Pb                   | 0.0058                    | 0.0004      | 31                                      | 3                 | 2                 |
| 2/1/2008      | SCO-1     | Pb                   | 0.0054                    | 0.0004      | 31                                      | 3                 | 2                 |

| Analysis Date | SRM       | Element <sup>A</sup> | FP-XRF                    |             | Standard reference material information |                   |                   |
|---------------|-----------|----------------------|---------------------------|-------------|-----------------------------------------|-------------------|-------------------|
|               |           |                      | signal (cps) <sup>B</sup> | uncertainty | concentration (ppm)                     | uncertainty (ppm) | flag <sup>C</sup> |
| 2/1/2008      | MAG-1     | Pb                   | 0.0043                    | 0.0004      | 24                                      | 3                 | 2                 |
| 2/1/2008      | MAG-1     | Pb                   | 0.0045                    | 0.0004      | 24                                      | 3                 | 2                 |
| 2/1/2008      | MAG-1     | Pb                   | 0.0052                    | 0.0004      | 24                                      | 3                 | 2                 |
| 2/1/2008      | MAG-1     | Pb                   | 0.0052                    | 0.0004      | 24                                      | 3                 | 2                 |
| 2/1/2008      | MAG-1     | Pb                   | 0.0047                    | 0.0004      | 24                                      | 3                 | 2                 |
| 2/1/2008      | NIST-2711 | Pb                   | 0.2412                    | 0.0022      | 1162                                    | 31                | 2                 |
| 2/1/2008      | NIST-2711 | Pb                   | 0.2425                    | 0.0022      | 1162                                    | 31                | 2                 |
| 2/1/2008      | NIST-2711 | Pb                   | 0.2459                    | 0.0022      | 1162                                    | 31                | 2                 |
| 2/1/2008      | NIST-2711 | Pb                   | 0.2396                    | 0.0022      | 1162                                    | 31                | 2                 |
| 2/1/2008      | NIST-2711 | Pb                   | 0.2377                    | 0.0022      | 1162                                    | 31                | 2                 |
| 2/1/2008      | NIST-2711 | Pb                   | 0.2392                    | 0.0022      | 1162                                    | 31                | 2                 |
| 2/1/2008      | SDO-1     | Pb                   | 0.0041                    | 0.0004      | 27.9                                    | 5.2               | 2                 |
| 2/1/2008      | SDO-1     | Pb                   | 0.0054                    | 0.0004      | 27.9                                    | 5.2               | 2                 |
| 2/1/2008      | SDO-1     | Pb                   | 0.0052                    | 0.0004      | 27.9                                    | 5.2               | 2                 |
| 2/1/2008      | SDO-1     | Pb                   | 0.0052                    | 0.0004      | 27.9                                    | 5.2               | 2                 |
| 2/1/2008      | SDO-1     | Pb                   | 0.0050                    | 0.0004      | 27.9                                    | 5.2               | 2                 |
| 2/1/2008      | NIST-2710 | U                    | 0.0095                    | 0.0011      | 25                                      | 2.5               | 1                 |
| 2/1/2008      | NIST-2710 | U                    | 0.0097                    | 0.0011      | 25                                      | 2.5               | 1                 |
| 2/1/2008      | NIST-2710 | U                    | 0.0118                    | 0.0011      | 25                                      | 2.5               | 1                 |
| 2/1/2008      | NIST-2710 | U                    | 0.0108                    | 0.0011      | 25                                      | 2.5               | 1                 |
| 2/1/2008      | NIST-2710 | U                    | 0.0102                    | 0.0011      | 25                                      | 2.5               | 1                 |
| 2/1/2008      | NIST-2711 | U                    | 0.0034                    | 0.0008      | 2.6                                     | 0.26              | 1                 |
| 2/1/2008      | NIST-2711 | U                    | 0.0026                    | 0.0008      | 2.6                                     | 0.26              | 1                 |
| 2/1/2008      | NIST-2704 | U                    | 0.0024                    | 0.0008      | 3.13                                    | 0.13              | 2                 |
| 2/1/2008      | NIST-2704 | U                    | 0.0024                    | 0.0008      | 3.13                                    | 0.13              | 2                 |
| 2/1/2008      | SDO-1     | U                    | 0.0134                    | 0.0011      | 48.8                                    | 6.5               | 2                 |
| 2/1/2008      | SDO-1     | U                    | 0.0145                    | 0.0011      | 48.8                                    | 6.5               | 2                 |
| 2/1/2008      | SDO-1     | U                    | 0.0134                    | 0.0011      | 48.8                                    | 6.5               | 2                 |
| 2/1/2008      | SDO-1     | U                    | 0.0142                    | 0.0011      | 48.8                                    | 6.5               | 2                 |
| 2/1/2008      | SDO-1     | U                    | 0.0137                    | 0.0011      | 48.8                                    | 6.5               | 2                 |
| 2/7/2008      | MESS-1    | S-LEAP               | 0.0066                    | 0.0016      | 7200                                    | 500               | 2                 |
| 2/7/2008      | NIST-2710 | S-LEAP               | 0.0063                    | 0.0019      | 2400                                    | 60                | 2                 |
| 2/7/2008      | SDO-1     | S-LEAP               | 0.0387                    | 0.0026      | 53500                                   | 4400              | 2                 |
| 2/7/2008      | MESS-1    | S-LEAP               | 0.0093                    | 0.0016      | 7200                                    | 500               | 2                 |
| 2/7/2008      | NIST-2710 | S-LEAP               | 0.0084                    | 0.0020      | 2400                                    | 60                | 2                 |

| Analysis Date | SRM       | Element <sup>A</sup> | FP-XRF                    |             | Standard reference material information |                   |                   |
|---------------|-----------|----------------------|---------------------------|-------------|-----------------------------------------|-------------------|-------------------|
|               |           |                      | signal (cps) <sup>B</sup> | uncertainty | concentration (ppm)                     | uncertainty (ppm) | flag <sup>C</sup> |
| 2/7/2008      | SDO-1     | S-LEAP               | 0.0368                    | 0.0026      | 53500                                   | 4400              | 2                 |
| 2/7/2008      | BCSS-1    | Cl-LEAP              | 0.0436                    | 0.0025      | 11200                                   | 500               | 2                 |
| 2/7/2008      | MESS-1    | Cl-LEAP              | 0.0388                    | 0.0024      | 8200                                    | 700               | 2                 |
| 2/7/2008      | MAG-1     | Cl-LEAP              | 0.0974                    | 0.0035      | 31000                                   | 600               | 2                 |
| 2/7/2008      | BCSS-1    | Cl-LEAP              | 0.0431                    | 0.0025      | 11200                                   | 500               | 2                 |
| 2/7/2008      | MESS-1    | Cl-LEAP              | 0.0381                    | 0.0024      | 8200                                    | 700               | 2                 |
| 2/7/2008      | MAG-1     | Cl-LEAP              | 0.0995                    | 0.0036      | 31000                                   | 600               | 2                 |
| 2/7/2008      | BCSS-1    | K-LEAP               | 0.2986                    | 0.0048      | 18014                                   | 332               | 2                 |
| 2/7/2008      | MESS-1    | K-LEAP               | 0.2921                    | 0.0047      | 18595                                   | 332               | 2                 |
| 2/7/2008      | NIST-2710 | K-LEAP               | 0.3721                    | 0.0061      | 21100                                   | 1100              | 2                 |
| 2/7/2008      | MAG-1     | K-LEAP               | 0.5151                    | 0.0071      | 29470                                   | 1411              | 2                 |
| 2/7/2008      | SDO-1     | K-LEAP               | 0.5123                    | 0.0074      | 27810                                   | 506               | 2                 |
| 2/7/2008      | NIST-2704 | K-LEAP               | 0.3913                    | 0.0060      | 20000                                   | 400               | 2                 |
| 2/7/2008      | NIST-2704 | K-LEAP               | 0.3803                    | 0.0058      | 20000                                   | 400               | 2                 |
| 2/7/2008      | NIST-2709 | K-LEAP               | 0.3269                    | 0.0052      | 20300                                   | 600               | 2                 |
| 2/7/2008      | NIST-2709 | K-LEAP               | 0.3119                    | 0.0051      | 20300                                   | 600               | 2                 |
| 2/7/2008      | NIST-2711 | K-LEAP               | 0.4010                    | 0.0059      | 24500                                   | 800               | 2                 |
| 2/7/2008      | NIST-2711 | K-LEAP               | 0.3947                    | 0.0058      | 24500                                   | 800               | 2                 |
| 2/7/2008      | SCO-1     | K-LEAP               | 0.3669                    | 0.0056      | 22995                                   | 664               | 2                 |
| 2/7/2008      | SCO-1     | K-LEAP               | 0.3667                    | 0.0056      | 22995                                   | 664               | 2                 |
| 2/7/2008      | BCSS-1    | K-LEAP               | 0.2856                    | 0.0047      | 18014                                   | 332               | 2                 |
| 2/7/2008      | MESS-1    | K-LEAP               | 0.2876                    | 0.0047      | 18595                                   | 332               | 2                 |
| 2/7/2008      | NIST-2710 | K-LEAP               | 0.3818                    | 0.0062      | 21100                                   | 1100              | 2                 |
| 2/7/2008      | MAG-1     | K-LEAP               | 0.5088                    | 0.0071      | 29470                                   | 1411              | 2                 |
| 2/7/2008      | SDO-1     | K-LEAP               | 0.5192                    | 0.0075      | 27810                                   | 506               | 2                 |
| 2/7/2008      | BCSS-1    | Ca-LEAP              | 0.1889                    | 0.0045      | 5432                                    | 529               | 2                 |
| 2/7/2008      | MESS-1    | Ca-LEAP              | 0.1500                    | 0.0041      | 4817                                    | 457               | 2                 |
| 2/7/2008      | NIST-2710 | Ca-LEAP              | 0.4621                    | 0.0074      | 12500                                   | 300               | 2                 |
| 2/7/2008      | MAG-1     | Ca-LEAP              | 0.3509                    | 0.0065      | 9791                                    | 715               | 2                 |
| 2/7/2008      | SDO-1     | Ca-LEAP              | 0.2672                    | 0.0060      | 7504                                    | 336               | 2                 |
| 2/7/2008      | NIST-2704 | Ca-LEAP              | 1.0051                    | 0.0115      | 26000                                   | 300               | 2                 |
| 2/7/2008      | NIST-2704 | Ca-LEAP              | 0.9920                    | 0.0112      | 26000                                   | 300               | 2                 |
| 2/7/2008      | NIST-2709 | Ca-LEAP              | 0.6773                    | 0.0086      | 18900                                   | 500               | 2                 |
| 2/7/2008      | NIST-2709 | Ca-LEAP              | 0.6537                    | 0.0083      | 18900                                   | 500               | 2                 |
| 2/7/2008      | NIST-2711 | Ca-LEAP              | 1.0403                    | 0.0115      | 28800                                   | 800               | 2                 |

| Analysis Date | SRM       | Element <sup>A</sup> | FP-XRF                    |             | Standard reference material information |                   |                   |
|---------------|-----------|----------------------|---------------------------|-------------|-----------------------------------------|-------------------|-------------------|
|               |           |                      | signal (cps) <sup>B</sup> | uncertainty | concentration (ppm)                     | uncertainty (ppm) | flag <sup>C</sup> |
| 2/7/2008      | NIST-2711 | Ca-LEAP              | 1.0206                    | 0.0111      | 28800                                   | 800               | 2                 |
| 2/7/2008      | SCO-1     | Ca-LEAP              | 0.6890                    | 0.0087      | 18725                                   | 1429              | 2                 |
| 2/7/2008      | SCO-1     | Ca-LEAP              | 0.6904                    | 0.0087      | 18725                                   | 1429              | 2                 |
| 2/7/2008      | BCSS-1    | Ca-LEAP              | 0.1933                    | 0.0044      | 5432                                    | 529               | 2                 |
| 2/7/2008      | MESS-1    | Ca-LEAP              | 0.1431                    | 0.0040      | 4817                                    | 457               | 2                 |
| 2/7/2008      | NIST-2710 | Ca-LEAP              | 0.4476                    | 0.0073      | 12500                                   | 300               | 2                 |
| 2/7/2008      | MAG-1     | Ca-LEAP              | 0.3309                    | 0.0063      | 9791                                    | 715               | 2                 |
| 2/7/2008      | SDO-1     | Ca-LEAP              | 0.2853                    | 0.0062      | 7504                                    | 336               | 2                 |
| 2/7/2008      | BCSS-1    | Ti-LEAP              | 0.3859                    | 0.0087      | 4400                                    | 144               | 2                 |
| 2/7/2008      | MESS-1    | Ti-LEAP              | 0.4655                    | 0.0092      | 5425                                    | 168               | 2                 |
| 2/7/2008      | NIST-2710 | Ti-LEAP              | 0.2943                    | 0.0093      | 2830                                    | 100               | 2                 |
| 2/7/2008      | MAG-1     | Ti-LEAP              | 0.3900                    | 0.0101      | 4496                                    | 420               | 2                 |
| 2/7/2008      | SDO-1     | Ti-LEAP              | 0.4212                    | 0.0108      | 4256                                    | 186               | 2                 |
| 2/7/2008      | NIST-2704 | Ti-LEAP              | 0.4635                    | 0.0101      | 4570                                    | 180               | 2                 |
| 2/7/2008      | NIST-2704 | Ti-LEAP              | 0.4607                    | 0.0099      | 4570                                    | 180               | 2                 |
| 2/7/2008      | NIST-2709 | Ti-LEAP              | 0.3104                    | 0.0085      | 3420                                    | 240               | 2                 |
| 2/7/2008      | NIST-2709 | Ti-LEAP              | 0.3021                    | 0.0084      | 3420                                    | 240               | 2                 |
| 2/7/2008      | NIST-2711 | Ti-LEAP              | 0.2611                    | 0.0078      | 3060                                    | 230               | 2                 |
| 2/7/2008      | NIST-2711 | Ti-LEAP              | 0.2516                    | 0.0075      | 3060                                    | 230               | 2                 |
| 2/7/2008      | SCO-1     | Ti-LEAP              | 0.3073                    | 0.0084      | 3776                                    | 360               | 2                 |
| 2/7/2008      | SCO-1     | Ti-LEAP              | 0.3037                    | 0.0084      | 3776                                    | 360               | 2                 |
| 2/7/2008      | BCSS-1    | Ti-LEAP              | 0.3957                    | 0.0085      | 4400                                    | 144               | 2                 |
| 2/7/2008      | MESS-1    | Ti-LEAP              | 0.4609                    | 0.0091      | 5425                                    | 168               | 2                 |
| 2/7/2008      | NIST-2710 | Ti-LEAP              | 0.2667                    | 0.0092      | 2830                                    | 100               | 2                 |
| 2/7/2008      | MAG-1     | Ti-LEAP              | 0.3927                    | 0.0100      | 4496                                    | 420               | 2                 |
| 2/7/2008      | SDO-1     | Ti-LEAP              | 0.4331                    | 0.0109      | 4256                                    | 186               | 2                 |
| 2/7/2008      | BCSS-1    | Ti                   | 0.0189                    | 0.0006      | 4400                                    | 144               | 2                 |
| 2/7/2008      | MESS-1    | Ti                   | 0.0256                    | 0.0007      | 5425                                    | 168               | 2                 |
| 2/7/2008      | NIST-2704 | Ti                   | 0.0247                    | 0.0008      | 4570                                    | 180               | 2                 |
| 2/7/2008      | NIST-2704 | Ti                   | 0.0269                    | 0.0008      | 4570                                    | 180               | 2                 |
| 2/7/2008      | NIST-2709 | Ti                   | 0.0170                    | 0.0006      | 3420                                    | 240               | 2                 |
| 2/7/2008      | NIST-2709 | Ti                   | 0.0163                    | 0.0006      | 3420                                    | 240               | 2                 |
| 2/7/2008      | BCSS-1    | Ti                   | 0.0223                    | 0.0007      | 4400                                    | 144               | 2                 |
| 2/7/2008      | MESS-1    | Ti                   | 0.0246                    | 0.0007      | 5425                                    | 168               | 2                 |
| 2/7/2008      | MAG-1     | Ti                   | 0.0231                    | 0.0008      | 4496                                    | 420               | 2                 |

| Analysis Date | SRM       | Element <sup>A</sup> | FP-XRF                    |             | Standard reference material information |                   |                   |
|---------------|-----------|----------------------|---------------------------|-------------|-----------------------------------------|-------------------|-------------------|
|               |           |                      | signal (cps) <sup>B</sup> | uncertainty | concentration (ppm)                     | uncertainty (ppm) | flag <sup>C</sup> |
| 2/7/2008      | SDO-1     | Ti                   | 0.0224                    | 0.0008      | 4256                                    | 186               | 2                 |
| 2/7/2008      | NIST-2711 | Ti                   | 0.0139                    | 0.0006      | 3060                                    | 230               | 2                 |
| 2/7/2008      | NIST-2711 | Ti                   | 0.0136                    | 0.0006      | 3060                                    | 230               | 2                 |
| 2/7/2008      | SCO-1     | Ti                   | 0.0162                    | 0.0006      | 3776                                    | 360               | 2                 |
| 2/7/2008      | SCO-1     | Ti                   | 0.0171                    | 0.0006      | 3776                                    | 360               | 2                 |
| 2/7/2008      | MAG-1     | Ti                   | 0.0221                    | 0.0008      | 4496                                    | 420               | 2                 |
| 2/7/2008      | SDO-1     | Ti                   | 0.0237                    | 0.0008      | 4256                                    | 186               | 2                 |
| 2/7/2008      | BCSS-1    | V                    | 0.0019                    | 0.0004      | 93.4                                    | 4.9               | 2                 |
| 2/7/2008      | MESS-1    | V                    | 0.0023                    | 0.0004      | 72.4                                    | 17                | 2                 |
| 2/7/2008      | NIST-2710 | V                    | 0.0016                    | 0.0005      | 76.6                                    | 2.3               | 2                 |
| 2/7/2008      | MAG-1     | V                    | 0.0021                    | 0.0005      | 140                                     | 6                 | 2                 |
| 2/7/2008      | SDO-1     | V                    | 0.0026                    | 0.0005      | 160                                     | 21                | 2                 |
| 2/7/2008      | NIST-2704 | V                    | 0.0026                    | 0.0005      | 95                                      | 4                 | 2                 |
| 2/7/2008      | NIST-2704 | V                    | 0.0018                    | 0.0004      | 95                                      | 4                 | 2                 |
| 2/7/2008      | NIST-2709 | V                    | 0.0020                    | 0.0004      | 112                                     | 5                 | 2                 |
| 2/7/2008      | NIST-2709 | V                    | 0.0025                    | 0.0004      | 112                                     | 5                 | 2                 |
| 2/7/2008      | NIST-2711 | V                    | 0.0018                    | 0.0004      | 81.6                                    | 2.9               | 2                 |
| 2/7/2008      | NIST-2711 | V                    | 0.0016                    | 0.0004      | 81.6                                    | 2.9               | 2                 |
| 2/7/2008      | SCO-1     | V                    | 0.0021                    | 0.0004      | 130                                     | 13                | 2                 |
| 2/7/2008      | SCO-1     | V                    | 0.0029                    | 0.0004      | 130                                     | 13                | 2                 |
| 2/7/2008      | BCSS-1    | V                    | 0.0023                    | 0.0004      | 93.4                                    | 4.9               | 2                 |
| 2/7/2008      | MESS-1    | V                    | 0.0023                    | 0.0004      | 72.4                                    | 17                | 2                 |
| 2/7/2008      | MAG-1     | V                    | 0.0037                    | 0.0005      | 140                                     | 6                 | 2                 |
| 2/7/2008      | SDO-1     | V                    | 0.0026                    | 0.0005      | 160                                     | 21                | 2                 |
| 2/7/2008      | BCSS-1    | Cr-LEAP              | 0.0397                    | 0.0028      | 123                                     | 14                | 2                 |
| 2/7/2008      | MESS-1    | Cr-LEAP              | 0.0274                    | 0.0025      | 71                                      | 11                | 2                 |
| 2/7/2008      | NIST-2704 | Cr-LEAP              | 0.0448                    | 0.0032      | 135                                     | 5                 | 2                 |
| 2/7/2008      | NIST-2704 | Cr-LEAP              | 0.0489                    | 0.0032      | 135                                     | 5                 | 2                 |
| 2/7/2008      | NIST-2709 | Cr-LEAP              | 0.0350                    | 0.0028      | 130                                     | 4                 | 2                 |
| 2/7/2008      | NIST-2709 | Cr-LEAP              | 0.0350                    | 0.0028      | 130                                     | 4                 | 2                 |
| 2/7/2008      | BCSS-1    | Cr-LEAP              | 0.0375                    | 0.0028      | 123                                     | 14                | 2                 |
| 2/7/2008      | MESS-1    | Cr-LEAP              | 0.0196                    | 0.0025      | 71                                      | 11                | 2                 |
| 2/7/2008      | MAG-1     | Cr-LEAP              | 0.0309                    | 0.0035      | 97                                      | 8                 | 2                 |
| 2/7/2008      | SDO-1     | Cr-LEAP              | 0.0218                    | 0.0038      | 66.4                                    | 7.6               | 2                 |
| 2/7/2008      | NIST-2711 | Cr-LEAP              | 0.0199                    | 0.0025      | 47                                      | 4.7               | 1                 |

| Analysis Date | SRM       | Element <sup>A</sup> | FP-XRF                    |             | Standard reference material information |                   |                   |
|---------------|-----------|----------------------|---------------------------|-------------|-----------------------------------------|-------------------|-------------------|
|               |           |                      | signal (cps) <sup>B</sup> | uncertainty | concentration (ppm)                     | uncertainty (ppm) | flag <sup>C</sup> |
| 2/7/2008      | NIST-2711 | Cr-LEAP              | 0.0205                    | 0.0025      | 47                                      | 4.7               | 1                 |
| 2/7/2008      | SCO-1     | Cr-LEAP              | 0.0199                    | 0.0028      | 68                                      | 5                 | 2                 |
| 2/7/2008      | SCO-1     | Cr-LEAP              | 0.0214                    | 0.0028      | 68                                      | 5                 | 2                 |
| 2/7/2008      | MAG-1     | Cr-LEAP              | 0.0271                    | 0.0035      | 97                                      | 8                 | 2                 |
| 2/7/2008      | SDO-1     | Cr-LEAP              | 0.0300                    | 0.0038      | 66.4                                    | 7.6               | 2                 |
| 2/7/2008      | BCSS-1    | Cr                   | 0.0019                    | 0.0004      | 123                                     | 14                | 2                 |
| 2/7/2008      | MESS-1    | Cr                   | 0.0011                    | 0.0004      | 71                                      | 11                | 2                 |
| 2/7/2008      | MAG-1     | Cr                   | 0.0019                    | 0.0005      | 97                                      | 8                 | 2                 |
| 2/7/2008      | NIST-2704 | Cr                   | 0.0023                    | 0.0004      | 135                                     | 5                 | 2                 |
| 2/7/2008      | NIST-2704 | Cr                   | 0.0027                    | 0.0004      | 135                                     | 5                 | 2                 |
| 2/7/2008      | NIST-2709 | Cr                   | 0.0019                    | 0.0004      | 130                                     | 4                 | 2                 |
| 2/7/2008      | NIST-2709 | Cr                   | 0.0015                    | 0.0004      | 130                                     | 4                 | 2                 |
| 2/7/2008      | SCO-1     | Cr                   | 0.0012                    | 0.0004      | 68                                      | 5                 | 2                 |
| 2/7/2008      | SCO-1     | Cr                   | 0.0014                    | 0.0004      | 68                                      | 5                 | 2                 |
| 2/7/2008      | BCSS-1    | Cr                   | 0.0024                    | 0.0004      | 123                                     | 14                | 2                 |
| 2/7/2008      | MESS-1    | Cr                   | 0.0018                    | 0.0004      | 71                                      | 11                | 2                 |
| 2/7/2008      | MAG-1     | Cr                   | 0.0019                    | 0.0005      | 97                                      | 8                 | 2                 |
| 2/7/2008      | BCSS-1    | Mn-LEAP              | 0.0447                    | 0.0042      | 229                                     | 15                | 2                 |
| 2/7/2008      | MESS-1    | Mn-LEAP              | 0.1409                    | 0.0046      | 513                                     | 25                | 2                 |
| 2/7/2008      | NIST-2704 | Mn-LEAP              | 0.1764                    | 0.0054      | 555                                     | 19                | 2                 |
| 2/7/2008      | NIST-2704 | Mn-LEAP              | 0.1914                    | 0.0054      | 555                                     | 19                | 2                 |
| 2/7/2008      | NIST-2709 | Mn-LEAP              | 0.1764                    | 0.0050      | 538                                     | 17                | 2                 |
| 2/7/2008      | NIST-2709 | Mn-LEAP              | 0.1705                    | 0.0050      | 538                                     | 17                | 2                 |
| 2/7/2008      | BCSS-1    | Mn-LEAP              | 0.0556                    | 0.0042      | 229                                     | 15                | 2                 |
| 2/7/2008      | MESS-1    | Mn-LEAP              | 0.1388                    | 0.0046      | 513                                     | 25                | 2                 |
| 2/7/2008      | MAG-1     | Mn-LEAP              | 0.2466                    | 0.0063      | 759                                     | 70                | 2                 |
| 2/7/2008      | SDO-1     | Mn-LEAP              | 0.0531                    | 0.0054      | 325                                     | 39                | 2                 |
| 2/7/2008      | NIST-2711 | Mn-LEAP              | 0.2086                    | 0.0050      | 638                                     | 28                | 2                 |
| 2/7/2008      | NIST-2711 | Mn-LEAP              | 0.1985                    | 0.0050      | 638                                     | 28                | 2                 |
| 2/7/2008      | SCO-1     | Mn-LEAP              | 0.1062                    | 0.0046      | 410                                     | 30                | 2                 |
| 2/7/2008      | SCO-1     | Mn-LEAP              | 0.0986                    | 0.0046      | 410                                     | 30                | 2                 |
| 2/7/2008      | MAG-1     | Mn-LEAP              | 0.2479                    | 0.0063      | 759                                     | 70                | 2                 |
| 2/7/2008      | SDO-1     | Mn-LEAP              | 0.0635                    | 0.0059      | 325                                     | 39                | 2                 |
| 2/7/2008      | BCSS-1    | Mn                   | 0.0031                    | 0.0005      | 229                                     | 15                | 2                 |
| 2/7/2008      | MESS-1    | Mn                   | 0.0082                    | 0.0006      | 513                                     | 25                | 2                 |

| Analysis Date | SRM       | Element <sup>A</sup> | FP-XRF                    |             | Standard reference material information |                   |                   |
|---------------|-----------|----------------------|---------------------------|-------------|-----------------------------------------|-------------------|-------------------|
|               |           |                      | signal (cps) <sup>B</sup> | uncertainty | concentration (ppm)                     | uncertainty (ppm) | flag <sup>C</sup> |
| 2/7/2008      | NIST-2704 | Mn                   | 0.0108                    | 0.0007      | 555                                     | 19                | 2                 |
| 2/7/2008      | NIST-2704 | Mn                   | 0.0111                    | 0.0007      | 555                                     | 19                | 2                 |
| 2/7/2008      | NIST-2709 | Mn                   | 0.0104                    | 0.0006      | 538                                     | 17                | 2                 |
| 2/7/2008      | NIST-2709 | Mn                   | 0.0108                    | 0.0006      | 538                                     | 17                | 2                 |
| 2/7/2008      | BCSS-1    | Mn                   | 0.0048                    | 0.0005      | 229                                     | 15                | 2                 |
| 2/7/2008      | MESS-1    | Mn                   | 0.0103                    | 0.0006      | 513                                     | 25                | 2                 |
| 2/7/2008      | MAG-1     | Mn                   | 0.0156                    | 0.0008      | 759                                     | 70                | 2                 |
| 2/7/2008      | SDO-1     | Mn                   | 0.0054                    | 0.0007      | 325                                     | 39                | 2                 |
| 2/7/2008      | NIST-2711 | Mn                   | 0.0112                    | 0.0006      | 638                                     | 28                | 2                 |
| 2/7/2008      | NIST-2711 | Mn                   | 0.0126                    | 0.0006      | 638                                     | 28                | 2                 |
| 2/7/2008      | SCO-1     | Mn                   | 0.0065                    | 0.0006      | 410                                     | 30                | 2                 |
| 2/7/2008      | SCO-1     | Mn                   | 0.0063                    | 0.0006      | 410                                     | 30                | 2                 |
| 2/7/2008      | MAG-1     | Mn                   | 0.0160                    | 0.0008      | 759                                     | 70                | 2                 |
| 2/7/2008      | SDO-1     | Mn                   | 0.0045                    | 0.0007      | 325                                     | 39                | 2                 |
| 2/7/2008      | BCSS-1    | Fe-LEAP              | 17.3342                   | 0.1331      | 32873                                   | 979               | 2                 |
| 2/7/2008      | MESS-1    | Fe-LEAP              | 15.4595                   | 0.1178      | 30495                                   | 1749              | 2                 |
| 2/7/2008      | NIST-2704 | Fe-LEAP              | 21.6277                   | 0.1732      | 41100                                   | 1000              | 2                 |
| 2/7/2008      | NIST-2704 | Fe-LEAP              | 21.3208                   | 0.1678      | 41100                                   | 1000              | 2                 |
| 2/7/2008      | NIST-2709 | Fe-LEAP              | 18.8130                   | 0.1461      | 35000                                   | 1100              | 2                 |
| 2/7/2008      | NIST-2709 | Fe-LEAP              | 18.4393                   | 0.1428      | 35000                                   | 1100              | 2                 |
| 2/7/2008      | BCSS-1    | Fe-LEAP              | 16.8123                   | 0.1271      | 32873                                   | 979               | 2                 |
| 2/7/2008      | MESS-1    | Fe-LEAP              | 15.3954                   | 0.1173      | 30495                                   | 1749              | 2                 |
| 2/7/2008      | MAG-1     | Fe-LEAP              | 26.1004                   | 0.2113      | 47561                                   | 4197              | 2                 |
| 2/7/2008      | SDO-1     | Fe-LEAP              | 34.0053                   | 0.2824      | 65327                                   | 1469              | 2                 |
| 2/7/2008      | NIST-2711 | Fe-LEAP              | 14.4641                   | 0.1140      | 28900                                   | 600               | 2                 |
| 2/7/2008      | NIST-2711 | Fe-LEAP              | 14.0247                   | 0.1092      | 28900                                   | 600               | 2                 |
| 2/7/2008      | SCO-1     | Fe-LEAP              | 18.4062                   | 0.1434      | 35881                                   | 1259              | 2                 |
| 2/7/2008      | SCO-1     | Fe-LEAP              | 18.3383                   | 0.1434      | 35881                                   | 1259              | 2                 |
| 2/7/2008      | MAG-1     | Fe-LEAP              | 26.0988                   | 0.2129      | 47561                                   | 4197              | 2                 |
| 2/7/2008      | SDO-1     | Fe-LEAP              | 34.3860                   | 0.2867      | 65327                                   | 1469              | 2                 |
| 2/7/2008      | BCSS-1    | Fe                   | 1.1198                    | 0.0057      | 32873                                   | 979               | 2                 |
| 2/7/2008      | MESS-1    | Fe                   | 1.0224                    | 0.0053      | 30495                                   | 1749              | 2                 |
| 2/7/2008      | NIST-2704 | Fe                   | 1.4461                    | 0.0073      | 41100                                   | 1000              | 2                 |
| 2/7/2008      | NIST-2704 | Fe                   | 1.4356                    | 0.0072      | 41100                                   | 1000              | 2                 |
| 2/7/2008      | NIST-2709 | Fe                   | 1.1773                    | 0.0059      | 35000                                   | 1100              | 2                 |

| Analysis Date | SRM       | Element <sup>A</sup> | FP-XRF                    |             | Standard reference material information |                   |                   |
|---------------|-----------|----------------------|---------------------------|-------------|-----------------------------------------|-------------------|-------------------|
|               |           |                      | signal (cps) <sup>B</sup> | uncertainty | concentration (ppm)                     | uncertainty (ppm) | flag <sup>C</sup> |
| 2/7/2008      | NIST-2709 | Fe                   | 1.1569                    | 0.0058      | 35000                                   | 1100              | 2                 |
| 2/7/2008      | BCSS-1    | Fe                   | 1.1040                    | 0.0056      | 32873                                   | 979               | 2                 |
| 2/7/2008      | MESS-1    | Fe                   | 1.0167                    | 0.0053      | 30495                                   | 1749              | 2                 |
| 2/7/2008      | MAG-1     | Fe                   | 1.7645                    | 0.0088      | 47561                                   | 4197              | 2                 |
| 2/7/2008      | SDO-1     | Fe                   | 2.3721                    | 0.0113      | 65327                                   | 1469              | 2                 |
| 2/7/2008      | NIST-2711 | Fe                   | 0.9457                    | 0.0051      | 28900                                   | 600               | 2                 |
| 2/7/2008      | NIST-2711 | Fe                   | 0.9280                    | 0.0051      | 28900                                   | 600               | 2                 |
| 2/7/2008      | SCO-1     | Fe                   | 1.1706                    | 0.0060      | 35881                                   | 1259              | 2                 |
| 2/7/2008      | SCO-1     | Fe                   | 1.1632                    | 0.0059      | 35881                                   | 1259              | 2                 |
| 2/7/2008      | MAG-1     | Fe                   | 1.7459                    | 0.0087      | 47561                                   | 4197              | 2                 |
| 2/7/2008      | SDO-1     | Fe                   | 2.3776                    | 0.0113      | 65327                                   | 1469              | 2                 |
| 2/7/2008      | BCSS-1    | Co                   | 0.0164                    | 0.0017      | 11.4                                    | 2.1               | 2                 |
| 2/7/2008      | MESS-1    | Co                   | 0.0146                    | 0.0016      | 10.8                                    | 1.9               | 2                 |
| 2/7/2008      | MAG-1     | Co                   | 0.0237                    | 0.0022      | 20                                      | 1.6               | 2                 |
| 2/7/2008      | SDO-1     | Co                   | 0.0364                    | 0.0026      | 46.8                                    | 6.3               | 2                 |
| 2/7/2008      | NIST-2704 | Co                   | 0.0161                    | 0.0019      | 14                                      | 0.6               | 2                 |
| 2/7/2008      | NIST-2704 | Co                   | 0.0179                    | 0.0019      | 14                                      | 0.6               | 2                 |
| 2/7/2008      | NIST-2709 | Co                   | 0.0153                    | 0.0017      | 13.4                                    | 0.7               | 2                 |
| 2/7/2008      | NIST-2709 | Co                   | 0.0178                    | 0.0017      | 13.4                                    | 0.7               | 2                 |
| 2/7/2008      | NIST-2711 | Co                   | 0.0128                    | 0.0016      | 10                                      | 1                 | 1                 |
| 2/7/2008      | NIST-2711 | Co                   | 0.0130                    | 0.0016      | 10                                      | 1                 | 1                 |
| 2/7/2008      | SCO-1     | Co                   | 0.0147                    | 0.0017      | 11                                      | 0.8               | 2                 |
| 2/7/2008      | SCO-1     | Co                   | 0.0188                    | 0.0017      | 11                                      | 0.8               | 2                 |
| 2/7/2008      | BCSS-1    | Co                   | 0.0120                    | 0.0017      | 11.4                                    | 2.1               | 2                 |
| 2/7/2008      | MESS-1    | Co                   | 0.0135                    | 0.0016      | 10.8                                    | 1.9               | 2                 |
| 2/7/2008      | MAG-1     | Co                   | 0.0252                    | 0.0022      | 20                                      | 1.6               | 2                 |
| 2/7/2008      | SDO-1     | Co                   | 0.0340                    | 0.0026      | 46.8                                    | 6.3               | 2                 |
| 2/7/2008      | BCSS-1    | Ni                   | 0.0025                    | 0.0006      | 55.3                                    | 3.6               | 2                 |
| 2/7/2008      | NIST-2709 | Ni                   | 0.0024                    | 0.0006      | 88                                      | 5                 | 2                 |
| 2/7/2008      | NIST-2709 | Ni                   | 0.0026                    | 0.0006      | 88                                      | 5                 | 2                 |
| 2/7/2008      | BCSS-1    | Ni                   | 0.0018                    | 0.0005      | 55.3                                    | 3.6               | 2                 |
| 2/7/2008      | BCSS-1    | Cu                   | 0.0016                    | 0.0004      | 18.5                                    | 2.7               | 2                 |
| 2/7/2008      | MESS-1    | Cu                   | 0.0023                    | 0.0004      | 25.1                                    | 3.8               | 2                 |
| 2/7/2008      | NIST-2704 | Cu                   | 0.0093                    | 0.0005      | 98.6                                    | 5                 | 2                 |
| 2/7/2008      | NIST-2704 | Cu                   | 0.0098                    | 0.0005      | 98.6                                    | 5                 | 2                 |



| Analysis Date | SRM       | Element <sup>A</sup> | FP-XRF                    |             | Standard reference material information |                   |                   |
|---------------|-----------|----------------------|---------------------------|-------------|-----------------------------------------|-------------------|-------------------|
|               |           |                      | signal (cps) <sup>B</sup> | uncertainty | concentration (ppm)                     | uncertainty (ppm) | flag <sup>C</sup> |
| 2/7/2008      | NIST-2709 | Cu                   | 0.0026                    | 0.0004      | 34.6                                    | 0.7               | 2                 |
| 2/7/2008      | NIST-2709 | Cu                   | 0.0025                    | 0.0004      | 34.6                                    | 0.7               | 2                 |
| 2/7/2008      | MESS-1    | Cu                   | 0.0025                    | 0.0004      | 25.1                                    | 3.8               | 2                 |
| 2/7/2008      | MAG-1     | Cu                   | 0.0021                    | 0.0004      | 30                                      | 3                 | 2                 |
| 2/7/2008      | SDO-1     | Cu                   | 0.0043                    | 0.0005      | 60.2                                    | 9.6               | 2                 |
| 2/7/2008      | NIST-2711 | Cu                   | 0.0109                    | 0.0005      | 114                                     | 2                 | 2                 |
| 2/7/2008      | NIST-2711 | Cu                   | 0.0104                    | 0.0005      | 114                                     | 2                 | 2                 |
| 2/7/2008      | SCO-1     | Cu                   | 0.0032                    | 0.0004      | 29                                      | 2                 | 2                 |
| 2/7/2008      | SCO-1     | Cu                   | 0.0020                    | 0.0004      | 29                                      | 2                 | 2                 |
| 2/7/2008      | MAG-1     | Cu                   | 0.0022                    | 0.0005      | 30                                      | 3                 | 2                 |
| 2/7/2008      | SDO-1     | Cu                   | 0.0042                    | 0.0005      | 60.2                                    | 9.6               | 2                 |
| 2/7/2008      | BCSS-1    | Zn                   | 0.0151                    | 0.0004      | 119                                     | 12                | 2                 |
| 2/7/2008      | MESS-1    | Zn                   | 0.0237                    | 0.0006      | 191                                     | 17                | 2                 |
| 2/7/2008      | NIST-2704 | Zn                   | 0.0586                    | 0.0010      | 438                                     | 12                | 2                 |
| 2/7/2008      | NIST-2704 | Zn                   | 0.0595                    | 0.0010      | 438                                     | 12                | 2                 |
| 2/7/2008      | NIST-2709 | Zn                   | 0.0130                    | 0.0004      | 106                                     | 3                 | 2                 |
| 2/7/2008      | NIST-2709 | Zn                   | 0.0127                    | 0.0004      | 106                                     | 3                 | 2                 |
| 2/7/2008      | BCSS-1    | Zn                   | 0.0138                    | 0.0004      | 119                                     | 12                | 2                 |
| 2/7/2008      | MESS-1    | Zn                   | 0.0235                    | 0.0006      | 191                                     | 17                | 2                 |
| 2/7/2008      | MAG-1     | Zn                   | 0.0181                    | 0.0006      | 130                                     | 6                 | 2                 |
| 2/7/2008      | SDO-1     | Zn                   | 0.0076                    | 0.0004      | 64.1                                    | 6.9               | 2                 |
| 2/7/2008      | NIST-2711 | Zn                   | 0.0466                    | 0.0009      | 350.4                                   | 4.8               | 2                 |
| 2/7/2008      | NIST-2711 | Zn                   | 0.0453                    | 0.0009      | 350.4                                   | 4.8               | 2                 |
| 2/7/2008      | SCO-1     | Zn                   | 0.0132                    | 0.0004      | 100                                     | 8                 | 2                 |
| 2/7/2008      | SCO-1     | Zn                   | 0.0130                    | 0.0004      | 100                                     | 8                 | 2                 |
| 2/7/2008      | MAG-1     | Zn                   | 0.0175                    | 0.0006      | 130                                     | 6                 | 2                 |
| 2/7/2008      | SDO-1     | Zn                   | 0.0063                    | 0.0004      | 64.1                                    | 6.9               | 2                 |
| 2/7/2008      | BCSS-1    | As                   | 0.0029                    | 0.0005      | 11.1                                    | 1.4               | 2                 |
| 2/7/2008      | MESS-1    | As                   | 0.0027                    | 0.0005      | 10.6                                    | 1.2               | 2                 |
| 2/7/2008      | NIST-2710 | As                   | 0.1381                    | 0.0059      | 626                                     | 38                | 2                 |
| 2/7/2008      | MAG-1     | As                   | 0.0027                    | 0.0005      | 9.2                                     | 0.92              | 1                 |
| 2/7/2008      | SDO-1     | As                   | 0.0177                    | 0.0008      | 68.5                                    | 8.6               | 2                 |
| 2/7/2008      | NIST-2704 | As                   | 0.0040                    | 0.0011      | 23.4                                    | 0.8               | 2                 |
| 2/7/2008      | NIST-2704 | As                   | 0.0043                    | 0.0011      | 23.4                                    | 0.8               | 2                 |
| 2/7/2008      | NIST-2709 | As                   | 0.0056                    | 0.0005      | 17.7                                    | 0.8               | 2                 |

| Analysis Date | SRM       | Element <sup>A</sup> | FP-XRF                    |             | Standard reference material information |                   |                   |
|---------------|-----------|----------------------|---------------------------|-------------|-----------------------------------------|-------------------|-------------------|
|               |           |                      | signal (cps) <sup>B</sup> | uncertainty | concentration (ppm)                     | uncertainty (ppm) | flag <sup>C</sup> |
| 2/7/2008      | NIST-2709 | As                   | 0.0048                    | 0.0005      | 17.7                                    | 0.8               | 2                 |
| 2/7/2008      | NIST-2711 | As                   | 0.0164                    | 0.0024      | 105                                     | 8                 | 2                 |
| 2/7/2008      | NIST-2711 | As                   | 0.0139                    | 0.0024      | 105                                     | 8                 | 2                 |
| 2/7/2008      | SCO-1     | As                   | 0.0032                    | 0.0005      | 12                                      | 1                 | 2                 |
| 2/7/2008      | SCO-1     | As                   | 0.0027                    | 0.0005      | 12                                      | 1                 | 2                 |
| 2/7/2008      | BCSS-1    | As                   | 0.0032                    | 0.0005      | 11.1                                    | 1.4               | 2                 |
| 2/7/2008      | MESS-1    | As                   | 0.0032                    | 0.0005      | 10.6                                    | 1.2               | 2                 |
| 2/7/2008      | NIST-2710 | As                   | 0.1383                    | 0.0059      | 626                                     | 38                | 2                 |
| 2/7/2008      | MAG-1     | As                   | 0.0027                    | 0.0005      | 9.2                                     | 0.92              | 1                 |
| 2/7/2008      | SDO-1     | As                   | 0.0182                    | 0.0008      | 68.5                                    | 8.6               | 2                 |
| 2/7/2008      | NIST-2710 | Br                   | 0.0048                    | 0.0013      | 6                                       | 0.6               | 1                 |
| 2/7/2008      | MAG-1     | Br                   | 0.1102                    | 0.0013      | 250                                     | 25                | 1                 |
| 2/7/2008      | NIST-2704 | Br                   | 0.0026                    | 0.0004      | 7                                       | 0.7               | 1                 |
| 2/7/2008      | NIST-2704 | Br                   | 0.0026                    | 0.0004      | 7                                       | 0.7               | 1                 |
| 2/7/2008      | NIST-2711 | Br                   | 0.0039                    | 0.0004      | 5                                       | 0.5               | 1                 |
| 2/7/2008      | NIST-2711 | Br                   | 0.0039                    | 0.0004      | 5                                       | 0.5               | 1                 |
| 2/7/2008      | NIST-2710 | Br                   | 0.0082                    | 0.0013      | 6                                       | 0.6               | 1                 |
| 2/7/2008      | MAG-1     | Br                   | 0.1085                    | 0.0013      | 250                                     | 25                | 1                 |
| 2/7/2008      | NIST-2710 | Rb                   | 0.0854                    | 0.0021      | 120                                     | 12                | 1                 |
| 2/7/2008      | MAG-1     | Rb                   | 0.0953                    | 0.0014      | 150                                     | 6                 | 2                 |
| 2/7/2008      | SDO-1     | Rb                   | 0.0770                    | 0.0014      | 126                                     | 3.9               | 2                 |
| 2/7/2008      | NIST-2704 | Rb                   | 0.0678                    | 0.0014      | 100                                     | 10                | 1                 |
| 2/7/2008      | NIST-2704 | Rb                   | 0.0657                    | 0.0014      | 100                                     | 10                | 1                 |
| 2/7/2008      | NIST-2709 | Rb                   | 0.0593                    | 0.0014      | 96                                      | 9.6               | 1                 |
| 2/7/2008      | NIST-2709 | Rb                   | 0.0558                    | 0.0014      | 96                                      | 9.6               | 1                 |
| 2/7/2008      | NIST-2711 | Rb                   | 0.0727                    | 0.0014      | 110                                     | 11                | 1                 |
| 2/7/2008      | NIST-2711 | Rb                   | 0.0741                    | 0.0014      | 110                                     | 11                | 1                 |
| 2/7/2008      | SCO-1     | Rb                   | 0.0713                    | 0.0014      | 110                                     | 4                 | 2                 |
| 2/7/2008      | SCO-1     | Rb                   | 0.0713                    | 0.0014      | 110                                     | 4                 | 2                 |
| 2/7/2008      | NIST-2710 | Rb                   | 0.0812                    | 0.0021      | 120                                     | 12                | 1                 |
| 2/7/2008      | MAG-1     | Rb                   | 0.0974                    | 0.0014      | 150                                     | 6                 | 2                 |
| 2/7/2008      | SDO-1     | Rb                   | 0.0770                    | 0.0014      | 126                                     | 3.9               | 2                 |
| 2/7/2008      | BCSS-1    | Sr                   | 0.0784                    | 0.0008      | 96                                      | 9.6               | 1                 |
| 2/7/2008      | MESS-1    | Sr                   | 0.0690                    | 0.0008      | 89                                      | 8.9               | 1                 |
| 2/7/2008      | NIST-2710 | Sr                   | 0.2515                    | 0.0024      | 330                                     | 33                | 1                 |

| Analysis Date | SRM       | Element <sup>A</sup> | FP-XRF                    |             | Standard reference material information |                   |                   |
|---------------|-----------|----------------------|---------------------------|-------------|-----------------------------------------|-------------------|-------------------|
|               |           |                      | signal (cps) <sup>B</sup> | uncertainty | concentration (ppm)                     | uncertainty (ppm) | flag <sup>C</sup> |
| 2/7/2008      | MAG-1     | Sr                   | 0.1089                    | 0.0016      | 150                                     | 15                | 2                 |
| 2/7/2008      | SDO-1     | Sr                   | 0.0564                    | 0.0008      | 75.1                                    | 11                | 2                 |
| 2/7/2008      | NIST-2704 | Sr                   | 0.1034                    | 0.0016      | 130                                     | 13                | 1                 |
| 2/7/2008      | NIST-2704 | Sr                   | 0.1003                    | 0.0016      | 130                                     | 13                | 1                 |
| 2/7/2008      | NIST-2709 | Sr                   | 0.1724                    | 0.0016      | 231                                     | 2                 | 2                 |
| 2/7/2008      | NIST-2709 | Sr                   | 0.1677                    | 0.0016      | 231                                     | 2                 | 2                 |
| 2/7/2008      | NIST-2711 | Sr                   | 0.1865                    | 0.0016      | 245.3                                   | 0.7               | 2                 |
| 2/7/2008      | NIST-2711 | Sr                   | 0.1834                    | 0.0016      | 245.3                                   | 0.7               | 2                 |
| 2/7/2008      | SCO-1     | Sr                   | 0.1277                    | 0.0016      | 170                                     | 16                | 2                 |
| 2/7/2008      | SCO-1     | Sr                   | 0.1246                    | 0.0016      | 170                                     | 16                | 2                 |
| 2/7/2008      | BCSS-1    | Sr                   | 0.0784                    | 0.0008      | 96                                      | 9.6               | 1                 |
| 2/7/2008      | MESS-1    | Sr                   | 0.0697                    | 0.0008      | 89                                      | 8.9               | 1                 |
| 2/7/2008      | NIST-2710 | Sr                   | 0.2539                    | 0.0024      | 330                                     | 33                | 1                 |
| 2/7/2008      | MAG-1     | Sr                   | 0.1042                    | 0.0016      | 150                                     | 15                | 2                 |
| 2/7/2008      | SDO-1     | Sr                   | 0.0556                    | 0.0008      | 75.1                                    | 11                | 2                 |
| 2/7/2008      | MAG-1     | Zr                   | 0.1309                    | 0.0023      | 130                                     | 13                | 2                 |
| 2/7/2008      | SDO-1     | Zr                   | 0.1601                    | 0.0023      | 165                                     | 24                | 2                 |
| 2/7/2008      | NIST-2704 | Zr                   | 0.2969                    | 0.0023      | 300                                     | 30                | 1                 |
| 2/7/2008      | NIST-2704 | Zr                   | 0.2946                    | 0.0023      | 300                                     | 30                | 1                 |
| 2/7/2008      | NIST-2709 | Zr                   | 0.1414                    | 0.0023      | 160                                     | 16                | 1                 |
| 2/7/2008      | NIST-2709 | Zr                   | 0.1426                    | 0.0023      | 160                                     | 16                | 1                 |
| 2/7/2008      | NIST-2711 | Zr                   | 0.2630                    | 0.0023      | 230                                     | 23                | 1                 |
| 2/7/2008      | NIST-2711 | Zr                   | 0.2572                    | 0.0023      | 230                                     | 23                | 1                 |
| 2/7/2008      | SCO-1     | Zr                   | 0.1718                    | 0.0023      | 160                                     | 30                | 2                 |
| 2/7/2008      | SCO-1     | Zr                   | 0.1753                    | 0.0023      | 160                                     | 30                | 2                 |
| 2/7/2008      | MAG-1     | Zr                   | 0.1297                    | 0.0023      | 130                                     | 13                | 2                 |
| 2/7/2008      | SDO-1     | Zr                   | 0.1613                    | 0.0023      | 165                                     | 24                | 2                 |
| 2/7/2008      | NIST-2710 | Mo                   | 0.0199                    | 0.0025      | 19                                      | 1.9               | 1                 |
| 2/7/2008      | SDO-1     | Mo                   | 0.1553                    | 0.0025      | 134                                     | 21                | 2                 |
| 2/7/2008      | NIST-2710 | Mo                   | 0.0149                    | 0.0025      | 19                                      | 1.9               | 1                 |
| 2/7/2008      | SDO-1     | Mo                   | 0.1578                    | 0.0025      | 134                                     | 21                | 2                 |
| 2/7/2008      | MESS-1    | Cd                   | 0.0150                    | 0.0036      | 0.59                                    | 0.10              | 2                 |
| 2/7/2008      | NIST-2710 | Cd                   | 0.0171                    | 0.0042      | 21.8                                    | 0.2               | 2                 |
| 2/7/2008      | NIST-2704 | Cd                   | 0.0150                    | 0.0039      | 3.45                                    | 0.22              | 2                 |
| 2/7/2008      | NIST-2711 | Cd                   | 0.0150                    | 0.0036      | 41.7                                    | 0.25              | 2                 |

| Analysis Date | SRM       | Element <sup>A</sup> | FP-XRF                    |             | Standard reference material information |                   |                   |
|---------------|-----------|----------------------|---------------------------|-------------|-----------------------------------------|-------------------|-------------------|
|               |           |                      | signal (cps) <sup>B</sup> | uncertainty | concentration (ppm)                     | uncertainty (ppm) | flag <sup>C</sup> |
| 2/7/2008      | NIST-2711 | Cd                   | 0.0156                    | 0.0036      | 41.7                                    | 0.25              | 2                 |
| 2/7/2008      | NIST-2710 | Cd                   | 0.0162                    | 0.0042      | 21.8                                    | 0.2               | 2                 |
| 2/7/2008      | NIST-2710 | Ba                   | 0.0756                    | 0.0050      | 707                                     | 51                | 2                 |
| 2/7/2008      | MAG-1     | Ba                   | 0.0931                    | 0.0052      | 480                                     | 41                | 2                 |
| 2/7/2008      | SDO-1     | Ba                   | 0.0852                    | 0.0056      | 397                                     | 38                | 2                 |
| 2/7/2008      | NIST-2704 | Ba                   | 0.0609                    | 0.0048      | 414                                     | 12                | 2                 |
| 2/7/2008      | NIST-2704 | Ba                   | 0.0668                    | 0.0048      | 414                                     | 12                | 2                 |
| 2/7/2008      | NIST-2709 | Ba                   | 0.0802                    | 0.0044      | 968                                     | 40                | 2                 |
| 2/7/2008      | NIST-2709 | Ba                   | 0.0812                    | 0.0044      | 968                                     | 40                | 2                 |
| 2/7/2008      | NIST-2711 | Ba                   | 0.0670                    | 0.0040      | 726                                     | 38                | 2                 |
| 2/7/2008      | NIST-2711 | Ba                   | 0.0607                    | 0.0038      | 726                                     | 38                | 2                 |
| 2/7/2008      | SCO-1     | Ba                   | 0.0764                    | 0.0044      | 570                                     | 30                | 2                 |
| 2/7/2008      | SCO-1     | Ba                   | 0.0741                    | 0.0044      | 570                                     | 30                | 2                 |
| 2/7/2008      | NIST-2710 | Ba                   | 0.0869                    | 0.0050      | 707                                     | 51                | 2                 |
| 2/7/2008      | MAG-1     | Ba                   | 0.0775                    | 0.0050      | 480                                     | 41                | 2                 |
| 2/7/2008      | SDO-1     | Ba                   | 0.0795                    | 0.0056      | 397                                     | 38                | 2                 |
| 2/7/2008      | NIST-2710 | Hg                   | 0.0110                    | 0.0008      | 32.6                                    | 1.8               | 2                 |
| 2/7/2008      | MAG-1     | Hg                   | 0.0011                    | 0.0003      | 0.02                                    | 0.002             | 1                 |
| 2/7/2008      | SDO-1     | Hg                   | 0.0011                    | 0.0003      | 0.19                                    | 0.08              | 2                 |
| 2/7/2008      | NIST-2704 | Hg                   | 0.0011                    | 0.0003      | 1.44                                    | 0.07              | 2                 |
| 2/7/2008      | NIST-2704 | Hg                   | 0.0009                    | 0.0003      | 1.44                                    | 0.07              | 2                 |
| 2/7/2008      | NIST-2709 | Hg                   | 0.0008                    | 0.0003      | 1.4                                     | 0.08              | 2                 |
| 2/7/2008      | NIST-2711 | Hg                   | 0.0013                    | 0.0003      | 6.25                                    | 0.19              | 2                 |
| 2/7/2008      | NIST-2711 | Hg                   | 0.0016                    | 0.0003      | 6.25                                    | 0.19              | 2                 |
| 2/7/2008      | NIST-2710 | Hg                   | 0.0102                    | 0.0008      | 32.6                                    | 1.8               | 2                 |
| 2/7/2008      | MAG-1     | Hg                   | 0.0008                    | 0.0003      | 0.02                                    | 0.002             | 1                 |
| 2/7/2008      | SDO-1     | Hg                   | 0.0009                    | 0.0003      | 0.19                                    | 0.08              | 2                 |
| 2/7/2008      | BCSS-1    | Pb                   | 0.0043                    | 0.0004      | 22.7                                    | 3.4               | 2                 |
| 2/7/2008      | MESS-1    | Pb                   | 0.0063                    | 0.0004      | 34                                      | 6.1               | 2                 |
| 2/7/2008      | NIST-2704 | Pb                   | 0.0324                    | 0.0009      | 161                                     | 17                | 2                 |
| 2/7/2008      | NIST-2704 | Pb                   | 0.0328                    | 0.0009      | 161                                     | 17                | 2                 |
| 2/7/2008      | NIST-2709 | Pb                   | 0.0024                    | 0.0004      | 18.9                                    | 0.5               | 2                 |
| 2/7/2008      | NIST-2709 | Pb                   | 0.0035                    | 0.0004      | 18.9                                    | 0.5               | 2                 |
| 2/7/2008      | BCSS-1    | Pb                   | 0.0037                    | 0.0004      | 22.7                                    | 3.4               | 2                 |
| 2/7/2008      | MESS-1    | Pb                   | 0.0058                    | 0.0004      | 34                                      | 6.1               | 2                 |

| Analysis Date | SRM       | Element <sup>A</sup> | FP-XRF                    |             | Standard reference material information |                   |                   |
|---------------|-----------|----------------------|---------------------------|-------------|-----------------------------------------|-------------------|-------------------|
|               |           |                      | signal (cps) <sup>B</sup> | uncertainty | concentration (ppm)                     | uncertainty (ppm) | flag <sup>C</sup> |
| 2/7/2008      | MAG-1     | Pb                   | 0.0045                    | 0.0004      | 24                                      | 3                 | 2                 |
| 2/7/2008      | SDO-1     | Pb                   | 0.0052                    | 0.0004      | 27.9                                    | 5.2               | 2                 |
| 2/7/2008      | NIST-2711 | Pb                   | 0.2396                    | 0.0022      | 1162                                    | 31                | 2                 |
| 2/7/2008      | NIST-2711 | Pb                   | 0.2371                    | 0.0022      | 1162                                    | 31                | 2                 |
| 2/7/2008      | SCO-1     | Pb                   | 0.0056                    | 0.0004      | 31                                      | 3                 | 2                 |
| 2/7/2008      | SCO-1     | Pb                   | 0.0063                    | 0.0004      | 31                                      | 3                 | 2                 |
| 2/7/2008      | MAG-1     | Pb                   | 0.0054                    | 0.0004      | 24                                      | 3                 | 2                 |
| 2/7/2008      | SDO-1     | Pb                   | 0.0054                    | 0.0004      | 27.9                                    | 5.2               | 2                 |
| 2/7/2008      | MAG-1     | Bi                   | 0.0040                    | 0.0006      | 0.34                                    | 0.034             | 1                 |
| 2/7/2008      | SCO-1     | Bi                   | 0.0034                    | 0.0003      | 0.37                                    | 0.037             | 1                 |
| 2/7/2008      | SCO-1     | Bi                   | 0.0028                    | 0.0003      | 0.37                                    | 0.037             | 1                 |
| 2/7/2008      | MAG-1     | Bi                   | 0.0040                    | 0.0006      | 0.34                                    | 0.034             | 1                 |
| 2/7/2008      | NIST-2710 | U                    | 0.0074                    | 0.0011      | 25                                      | 2.5               | 1                 |
| 2/7/2008      | MAG-1     | U                    | 0.0032                    | 0.0008      | 2.7                                     | 0.3               | 2                 |
| 2/7/2008      | SDO-1     | U                    | 0.0142                    | 0.0011      | 48.8                                    | 6.5               | 2                 |
| 2/7/2008      | NIST-2704 | U                    | 0.0026                    | 0.0008      | 3.13                                    | 0.13              | 2                 |
| 2/7/2008      | NIST-2704 | U                    | 0.0029                    | 0.0008      | 3.13                                    | 0.13              | 2                 |
| 2/7/2008      | NIST-2709 | U                    | 0.0034                    | 0.0008      | 3                                       | 0.3               | 1                 |
| 2/7/2008      | NIST-2711 | U                    | 0.0026                    | 0.0008      | 2.6                                     | 0.26              | 1                 |
| 2/7/2008      | NIST-2710 | U                    | 0.0102                    | 0.0011      | 25                                      | 2.5               | 1                 |
| 2/7/2008      | SDO-1     | U                    | 0.0147                    | 0.0011      | 48.8                                    | 6.5               | 2                 |
| 3/1/2008      | MESS-1    | S-LEAP               | 0.0056                    | 0.0015      | 7200                                    | 500               | 2                 |
| 3/1/2008      | NIST-2710 | S-LEAP               | 0.0113                    | 0.0020      | 2400                                    | 60                | 2                 |
| 3/1/2008      | SDO-1     | S-LEAP               | 0.0335                    | 0.0025      | 53500                                   | 4400              | 2                 |
| 3/1/2008      | BCSS-1    | Cl-LEAP              | 0.0405                    | 0.0025      | 11200                                   | 500               | 2                 |
| 3/1/2008      | MESS-1    | Cl-LEAP              | 0.0407                    | 0.0024      | 8200                                    | 700               | 2                 |
| 3/1/2008      | MAG-1     | Cl-LEAP              | 0.0964                    | 0.0035      | 31000                                   | 600               | 2                 |
| 3/1/2008      | BCSS-1    | K-LEAP               | 0.2865                    | 0.0047      | 18014                                   | 332               | 2                 |
| 3/1/2008      | MESS-1    | K-LEAP               | 0.2918                    | 0.0047      | 18595                                   | 332               | 2                 |
| 3/1/2008      | NIST-2710 | K-LEAP               | 0.3812                    | 0.0062      | 21100                                   | 1100              | 2                 |
| 3/1/2008      | MAG-1     | K-LEAP               | 0.5146                    | 0.0072      | 29470                                   | 1411              | 2                 |
| 3/1/2008      | NIST-2704 | K-LEAP               | 0.3702                    | 0.0058      | 20000                                   | 400               | 2                 |
| 3/1/2008      | NIST-2709 | K-LEAP               | 0.3235                    | 0.0052      | 20300                                   | 600               | 2                 |
| 3/1/2008      | NIST-2711 | K-LEAP               | 0.3992                    | 0.0059      | 24500                                   | 800               | 2                 |
| 3/1/2008      | SCO-1     | K-LEAP               | 0.3642                    | 0.0055      | 22995                                   | 664               | 2                 |

| Analysis Date | SRM       | Element <sup>A</sup> | FP-XRF                    |             | Standard reference material information |                   |                   |
|---------------|-----------|----------------------|---------------------------|-------------|-----------------------------------------|-------------------|-------------------|
|               |           |                      | signal (cps) <sup>B</sup> | uncertainty | concentration (ppm)                     | uncertainty (ppm) | flag <sup>C</sup> |
| 3/1/2008      | SDO-1     | K-LEAP               | 0.5059                    | 0.0073      | 27810                                   | 506               | 2                 |
| 3/1/2008      | BCSS-1    | Ca-LEAP              | 0.1950                    | 0.0045      | 5432                                    | 529               | 2                 |
| 3/1/2008      | MESS-1    | Ca-LEAP              | 0.1424                    | 0.0040      | 4817                                    | 457               | 2                 |
| 3/1/2008      | NIST-2710 | Ca-LEAP              | 0.4429                    | 0.0073      | 12500                                   | 300               | 2                 |
| 3/1/2008      | MAG-1     | Ca-LEAP              | 0.3478                    | 0.0065      | 9791                                    | 715               | 2                 |
| 3/1/2008      | NIST-2704 | Ca-LEAP              | 0.9912                    | 0.0112      | 26000                                   | 300               | 2                 |
| 3/1/2008      | NIST-2709 | Ca-LEAP              | 0.6672                    | 0.0084      | 18900                                   | 500               | 2                 |
| 3/1/2008      | NIST-2711 | Ca-LEAP              | 1.0153                    | 0.0112      | 28800                                   | 800               | 2                 |
| 3/1/2008      | SCO-1     | Ca-LEAP              | 0.6679                    | 0.0084      | 18725                                   | 1429              | 2                 |
| 3/1/2008      | SDO-1     | Ca-LEAP              | 0.2701                    | 0.0060      | 7504                                    | 336               | 2                 |
| 3/1/2008      | BCSS-1    | Ti-LEAP              | 0.3869                    | 0.0086      | 4400                                    | 144               | 2                 |
| 3/1/2008      | MESS-1    | Ti-LEAP              | 0.4295                    | 0.0088      | 5425                                    | 168               | 2                 |
| 3/1/2008      | NIST-2710 | Ti-LEAP              | 0.2753                    | 0.0092      | 2830                                    | 100               | 2                 |
| 3/1/2008      | MAG-1     | Ti-LEAP              | 0.3995                    | 0.0100      | 4496                                    | 420               | 2                 |
| 3/1/2008      | NIST-2704 | Ti-LEAP              | 0.4580                    | 0.0098      | 4570                                    | 180               | 2                 |
| 3/1/2008      | NIST-2709 | Ti-LEAP              | 0.3024                    | 0.0084      | 3420                                    | 240               | 2                 |
| 3/1/2008      | NIST-2711 | Ti-LEAP              | 0.2623                    | 0.0078      | 3060                                    | 230               | 2                 |
| 3/1/2008      | SCO-1     | Ti-LEAP              | 0.3138                    | 0.0083      | 3776                                    | 360               | 2                 |
| 3/1/2008      | SDO-1     | Ti-LEAP              | 0.3997                    | 0.0107      | 4256                                    | 186               | 2                 |
| 3/1/2008      | BCSS-1    | Ti                   | 0.0202                    | 0.0007      | 4400                                    | 144               | 2                 |
| 3/1/2008      | MESS-1    | Ti                   | 0.0261                    | 0.0007      | 5425                                    | 168               | 2                 |
| 3/1/2008      | NIST-2704 | Ti                   | 0.0246                    | 0.0008      | 4570                                    | 180               | 2                 |
| 3/1/2008      | NIST-2709 | Ti                   | 0.0168                    | 0.0006      | 3420                                    | 240               | 2                 |
| 3/1/2008      | MAG-1     | Ti                   | 0.0224                    | 0.0008      | 4496                                    | 420               | 2                 |
| 3/1/2008      | NIST-2711 | Ti                   | 0.0143                    | 0.0006      | 3060                                    | 230               | 2                 |
| 3/1/2008      | SCO-1     | Ti                   | 0.0168                    | 0.0006      | 3776                                    | 360               | 2                 |
| 3/1/2008      | SDO-1     | Ti                   | 0.0240                    | 0.0008      | 4256                                    | 186               | 2                 |
| 3/1/2008      | BCSS-1    | V                    | 0.0020                    | 0.0004      | 93.4                                    | 4.9               | 2                 |
| 3/1/2008      | MESS-1    | V                    | 0.0021                    | 0.0004      | 72.4                                    | 17                | 2                 |
| 3/1/2008      | NIST-2710 | V                    | 0.0022                    | 0.0005      | 76.6                                    | 2.3               | 2                 |
| 3/1/2008      | MAG-1     | V                    | 0.0031                    | 0.0005      | 140                                     | 6                 | 2                 |
| 3/1/2008      | NIST-2704 | V                    | 0.0020                    | 0.0004      | 95                                      | 4                 | 2                 |
| 3/1/2008      | NIST-2709 | V                    | 0.0021                    | 0.0004      | 112                                     | 5                 | 2                 |
| 3/1/2008      | NIST-2711 | V                    | 0.0017                    | 0.0004      | 81.6                                    | 2.9               | 2                 |
| 3/1/2008      | SCO-1     | V                    | 0.0022                    | 0.0004      | 130                                     | 13                | 2                 |

| Analysis Date | SRM       | Element <sup>A</sup> | FP-XRF                    |             | Standard reference material information |                   |                   |
|---------------|-----------|----------------------|---------------------------|-------------|-----------------------------------------|-------------------|-------------------|
|               |           |                      | signal (cps) <sup>B</sup> | uncertainty | concentration (ppm)                     | uncertainty (ppm) | flag <sup>C</sup> |
| 3/1/2008      | SDO-1     | V                    | 0.0026                    | 0.0005      | 160                                     | 21                | 2                 |
| 3/1/2008      | BCSS-1    | Cr-LEAP              | 0.0410                    | 0.0028      | 123                                     | 14                | 2                 |
| 3/1/2008      | MESS-1    | Cr-LEAP              | 0.0214                    | 0.0025      | 71                                      | 11                | 2                 |
| 3/1/2008      | NIST-2704 | Cr-LEAP              | 0.0397                    | 0.0032      | 135                                     | 5                 | 2                 |
| 3/1/2008      | NIST-2709 | Cr-LEAP              | 0.0397                    | 0.0028      | 130                                     | 4                 | 2                 |
| 3/1/2008      | MAG-1     | Cr-LEAP              | 0.0331                    | 0.0035      | 97                                      | 8                 | 2                 |
| 3/1/2008      | NIST-2711 | Cr-LEAP              | 0.0189                    | 0.0025      | 47                                      | 4.7               | 1                 |
| 3/1/2008      | SCO-1     | Cr-LEAP              | 0.0246                    | 0.0028      | 68                                      | 5                 | 2                 |
| 3/1/2008      | SDO-1     | Cr-LEAP              | 0.0240                    | 0.0038      | 66.4                                    | 7.6               | 2                 |
| 3/1/2008      | BCSS-1    | Cr                   | 0.0022                    | 0.0004      | 123                                     | 14                | 2                 |
| 3/1/2008      | MESS-1    | Cr                   | 0.0012                    | 0.0004      | 71                                      | 11                | 2                 |
| 3/1/2008      | MAG-1     | Cr                   | 0.0016                    | 0.0005      | 97                                      | 8                 | 2                 |
| 3/1/2008      | NIST-2704 | Cr                   | 0.0025                    | 0.0004      | 135                                     | 5                 | 2                 |
| 3/1/2008      | NIST-2709 | Cr                   | 0.0025                    | 0.0004      | 130                                     | 4                 | 2                 |
| 3/1/2008      | SCO-1     | Cr                   | 0.0015                    | 0.0004      | 68                                      | 5                 | 2                 |
| 3/1/2008      | BCSS-1    | Mn-LEAP              | 0.0468                    | 0.0042      | 229                                     | 15                | 2                 |
| 3/1/2008      | MESS-1    | Mn-LEAP              | 0.1450                    | 0.0046      | 513                                     | 25                | 2                 |
| 3/1/2008      | NIST-2704 | Mn-LEAP              | 0.1872                    | 0.0054      | 555                                     | 19                | 2                 |
| 3/1/2008      | NIST-2709 | Mn-LEAP              | 0.1760                    | 0.0050      | 538                                     | 17                | 2                 |
| 3/1/2008      | MAG-1     | Mn-LEAP              | 0.2516                    | 0.0063      | 759                                     | 70                | 2                 |
| 3/1/2008      | NIST-2711 | Mn-LEAP              | 0.2144                    | 0.0050      | 638                                     | 28                | 2                 |
| 3/1/2008      | SCO-1     | Mn-LEAP              | 0.1112                    | 0.0046      | 410                                     | 30                | 2                 |
| 3/1/2008      | SDO-1     | Mn-LEAP              | 0.0769                    | 0.0059      | 325                                     | 39                | 2                 |
| 3/1/2008      | BCSS-1    | Mn                   | 0.0028                    | 0.0005      | 229                                     | 15                | 2                 |
| 3/1/2008      | MESS-1    | Mn                   | 0.0090                    | 0.0006      | 513                                     | 25                | 2                 |
| 3/1/2008      | NIST-2704 | Mn                   | 0.0114                    | 0.0007      | 555                                     | 19                | 2                 |
| 3/1/2008      | NIST-2709 | Mn                   | 0.0094                    | 0.0006      | 538                                     | 17                | 2                 |
| 3/1/2008      | MAG-1     | Mn                   | 0.0177                    | 0.0008      | 759                                     | 70                | 2                 |
| 3/1/2008      | NIST-2711 | Mn                   | 0.0120                    | 0.0006      | 638                                     | 28                | 2                 |
| 3/1/2008      | SCO-1     | Mn                   | 0.0073                    | 0.0006      | 410                                     | 30                | 2                 |
| 3/1/2008      | SDO-1     | Mn                   | 0.0048                    | 0.0007      | 325                                     | 39                | 2                 |
| 3/1/2008      | BCSS-1    | Fe-LEAP              | 17.1088                   | 0.1309      | 32873                                   | 979               | 2                 |
| 3/1/2008      | MESS-1    | Fe-LEAP              | 15.2656                   | 0.1146      | 30495                                   | 1749              | 2                 |
| 3/1/2008      | NIST-2704 | Fe-LEAP              | 21.4957                   | 0.1694      | 41100                                   | 1000              | 2                 |
| 3/1/2008      | NIST-2709 | Fe-LEAP              | 18.6642                   | 0.1445      | 35000                                   | 1100              | 2                 |

| Analysis Date | SRM       | Element <sup>A</sup> | FP-XRF                    |             | Standard reference material information |                   |                   |
|---------------|-----------|----------------------|---------------------------|-------------|-----------------------------------------|-------------------|-------------------|
|               |           |                      | signal (cps) <sup>B</sup> | uncertainty | concentration (ppm)                     | uncertainty (ppm) | flag <sup>C</sup> |
| 3/1/2008      | MAG-1     | Fe-LEAP              | 26.2639                   | 0.2134      | 47561                                   | 4197              | 2                 |
| 3/1/2008      | NIST-2711 | Fe-LEAP              | 14.3370                   | 0.1130      | 28900                                   | 600               | 2                 |
| 3/1/2008      | SCO-1     | Fe-LEAP              | 18.2009                   | 0.1407      | 35881                                   | 1259              | 2                 |
| 3/1/2008      | SDO-1     | Fe-LEAP              | 33.8152                   | 0.2808      | 65327                                   | 1469              | 2                 |
| 3/1/2008      | BCSS-1    | Fe                   | 1.0869                    | 0.0056      | 32873                                   | 979               | 2                 |
| 3/1/2008      | MESS-1    | Fe                   | 1.0248                    | 0.0053      | 30495                                   | 1749              | 2                 |
| 3/1/2008      | NIST-2704 | Fe                   | 1.4500                    | 0.0073      | 41100                                   | 1000              | 2                 |
| 3/1/2008      | NIST-2709 | Fe                   | 1.1837                    | 0.0059      | 35000                                   | 1100              | 2                 |
| 3/1/2008      | MAG-1     | Fe                   | 1.7669                    | 0.0087      | 47561                                   | 4197              | 2                 |
| 3/1/2008      | NIST-2711 | Fe                   | 0.9387                    | 0.0051      | 28900                                   | 600               | 2                 |
| 3/1/2008      | SCO-1     | Fe                   | 1.1665                    | 0.0059      | 35881                                   | 1259              | 2                 |
| 3/1/2008      | SDO-1     | Fe                   | 2.3942                    | 0.0114      | 65327                                   | 1469              | 2                 |
| 3/1/2008      | BCSS-1    | Co                   | 0.0150                    | 0.0017      | 11.4                                    | 2.1               | 2                 |
| 3/1/2008      | MESS-1    | Co                   | 0.0128                    | 0.0016      | 10.8                                    | 1.9               | 2                 |
| 3/1/2008      | MAG-1     | Co                   | 0.0231                    | 0.0022      | 20                                      | 1.6               | 2                 |
| 3/1/2008      | NIST-2704 | Co                   | 0.0235                    | 0.0020      | 14                                      | 0.6               | 2                 |
| 3/1/2008      | NIST-2709 | Co                   | 0.0152                    | 0.0017      | 13.4                                    | 0.7               | 2                 |
| 3/1/2008      | NIST-2711 | Co                   | 0.0136                    | 0.0016      | 10                                      | 1                 | 1                 |
| 3/1/2008      | SCO-1     | Co                   | 0.0209                    | 0.0018      | 11                                      | 0.8               | 2                 |
| 3/1/2008      | SDO-1     | Co                   | 0.0358                    | 0.0026      | 46.8                                    | 6.3               | 2                 |
| 3/1/2008      | BCSS-1    | Ni                   | 0.0023                    | 0.0005      | 55.3                                    | 3.6               | 2                 |
| 3/1/2008      | NIST-2709 | Ni                   | 0.0025                    | 0.0006      | 88                                      | 5                 | 2                 |
| 3/1/2008      | SDO-1     | Ni                   | 0.0033                    | 0.0008      | 99.5                                    | 9.9               | 2                 |
| 3/1/2008      | MESS-1    | Cu                   | 0.0025                    | 0.0004      | 25.1                                    | 3.8               | 2                 |
| 3/1/2008      | NIST-2704 | Cu                   | 0.0107                    | 0.0005      | 98.6                                    | 5                 | 2                 |
| 3/1/2008      | NIST-2709 | Cu                   | 0.0037                    | 0.0004      | 34.6                                    | 0.7               | 2                 |
| 3/1/2008      | MAG-1     | Cu                   | 0.0036                    | 0.0005      | 30                                      | 3                 | 2                 |
| 3/1/2008      | NIST-2711 | Cu                   | 0.0109                    | 0.0005      | 114                                     | 2                 | 2                 |
| 3/1/2008      | SCO-1     | Cu                   | 0.0029                    | 0.0004      | 29                                      | 2                 | 2                 |
| 3/1/2008      | SDO-1     | Cu                   | 0.0046                    | 0.0005      | 60.2                                    | 9.6               | 2                 |
| 3/1/2008      | BCSS-1    | Zn                   | 0.0144                    | 0.0004      | 119                                     | 12                | 2                 |
| 3/1/2008      | MESS-1    | Zn                   | 0.0252                    | 0.0006      | 191                                     | 17                | 2                 |
| 3/1/2008      | NIST-2704 | Zn                   | 0.0567                    | 0.0009      | 438                                     | 12                | 2                 |
| 3/1/2008      | NIST-2709 | Zn                   | 0.0126                    | 0.0004      | 106                                     | 3                 | 2                 |
| 3/1/2008      | MAG-1     | Zn                   | 0.0168                    | 0.0006      | 130                                     | 6                 | 2                 |



| Analysis Date | SRM       | Element <sup>A</sup> | FP-XRF                    |             | Standard reference material information |                   |                   |
|---------------|-----------|----------------------|---------------------------|-------------|-----------------------------------------|-------------------|-------------------|
|               |           |                      | signal (cps) <sup>B</sup> | uncertainty | concentration (ppm)                     | uncertainty (ppm) | flag <sup>C</sup> |
| 3/1/2008      | NIST-2711 | Zn                   | 0.0457                    | 0.0009      | 350.4                                   | 4.8               | 2                 |
| 3/1/2008      | SCO-1     | Zn                   | 0.0126                    | 0.0004      | 100                                     | 8                 | 2                 |
| 3/1/2008      | SDO-1     | Zn                   | 0.0069                    | 0.0004      | 64.1                                    | 6.9               | 2                 |
| 3/1/2008      | BCSS-1    | As                   | 0.0038                    | 0.0005      | 11.1                                    | 1.4               | 2                 |
| 3/1/2008      | MESS-1    | As                   | 0.0032                    | 0.0005      | 10.6                                    | 1.2               | 2                 |
| 3/1/2008      | NIST-2710 | As                   | 0.1458                    | 0.0062      | 626                                     | 38                | 2                 |
| 3/1/2008      | MAG-1     | As                   | 0.0021                    | 0.0005      | 9.2                                     | 0.92              | 1                 |
| 3/1/2008      | NIST-2704 | As                   | 0.0056                    | 0.0011      | 23.4                                    | 0.8               | 2                 |
| 3/1/2008      | NIST-2709 | As                   | 0.0046                    | 0.0005      | 17.7                                    | 0.8               | 2                 |
| 3/1/2008      | NIST-2711 | As                   | 0.0121                    | 0.0024      | 105                                     | 8                 | 2                 |
| 3/1/2008      | SCO-1     | As                   | 0.0038                    | 0.0005      | 12                                      | 1                 | 2                 |
| 3/1/2008      | SDO-1     | As                   | 0.0193                    | 0.0008      | 68.5                                    | 8.6               | 2                 |
| 3/1/2008      | NIST-2710 | Br                   | 0.0073                    | 0.0013      | 6                                       | 0.6               | 1                 |
| 3/1/2008      | MAG-1     | Br                   | 0.1076                    | 0.0013      | 250                                     | 25                | 1                 |
| 3/1/2008      | NIST-2704 | Br                   | 0.0026                    | 0.0004      | 7                                       | 0.7               | 1                 |
| 3/1/2008      | NIST-2711 | Br                   | 0.0048                    | 0.0004      | 5                                       | 0.5               | 1                 |
| 3/1/2008      | NIST-2710 | Rb                   | 0.0798                    | 0.0021      | 120                                     | 12                | 1                 |
| 3/1/2008      | MAG-1     | Rb                   | 0.0953                    | 0.0014      | 150                                     | 6                 | 2                 |
| 3/1/2008      | NIST-2704 | Rb                   | 0.0671                    | 0.0014      | 100                                     | 10                | 1                 |
| 3/1/2008      | NIST-2709 | Rb                   | 0.0586                    | 0.0014      | 96                                      | 9.6               | 1                 |
| 3/1/2008      | NIST-2711 | Rb                   | 0.0741                    | 0.0014      | 110                                     | 11                | 1                 |
| 3/1/2008      | SCO-1     | Rb                   | 0.0720                    | 0.0014      | 110                                     | 4                 | 2                 |
| 3/1/2008      | SDO-1     | Rb                   | 0.0763                    | 0.0014      | 126                                     | 3.9               | 2                 |
| 3/1/2008      | BCSS-1    | Sr                   | 0.0768                    | 0.0008      | 96                                      | 9.6               | 1                 |
| 3/1/2008      | MESS-1    | Sr                   | 0.0682                    | 0.0008      | 89                                      | 8.9               | 1                 |
| 3/1/2008      | NIST-2710 | Sr                   | 0.2609                    | 0.0024      | 330                                     | 33                | 1                 |
| 3/1/2008      | MAG-1     | Sr                   | 0.1058                    | 0.0016      | 150                                     | 15                | 2                 |
| 3/1/2008      | NIST-2704 | Sr                   | 0.1050                    | 0.0016      | 130                                     | 13                | 1                 |
| 3/1/2008      | NIST-2709 | Sr                   | 0.1716                    | 0.0016      | 231                                     | 2                 | 2                 |
| 3/1/2008      | NIST-2711 | Sr                   | 0.1834                    | 0.0016      | 245.3                                   | 0.7               | 2                 |
| 3/1/2008      | SCO-1     | Sr                   | 0.1269                    | 0.0016      | 170                                     | 16                | 2                 |
| 3/1/2008      | SDO-1     | Sr                   | 0.0564                    | 0.0008      | 75.1                                    | 11                | 2                 |
| 3/1/2008      | MAG-1     | Zr                   | 0.1321                    | 0.0023      | 130                                     | 13                | 2                 |
| 3/1/2008      | NIST-2704 | Zr                   | 0.3437                    | 0.0023      | 300                                     | 30                | 1                 |
| 3/1/2008      | NIST-2709 | Zr                   | 0.1356                    | 0.0023      | 160                                     | 16                | 1                 |

| Analysis Date | SRM       | Element <sup>A</sup> | FP-XRF                    |             | Standard reference material information |                   |                   |
|---------------|-----------|----------------------|---------------------------|-------------|-----------------------------------------|-------------------|-------------------|
|               |           |                      | signal (cps) <sup>B</sup> | uncertainty | concentration (ppm)                     | uncertainty (ppm) | flag <sup>C</sup> |
| 3/1/2008      | NIST-2711 | Zr                   | 0.2688                    | 0.0023      | 230                                     | 23                | 1                 |
| 3/1/2008      | SCO-1     | Zr                   | 0.1765                    | 0.0023      | 160                                     | 30                | 2                 |
| 3/1/2008      | SDO-1     | Zr                   | 0.1625                    | 0.0023      | 165                                     | 24                | 2                 |
| 3/1/2008      | MESS-1    | Mo                   | 0.0075                    | 0.0012      | 2.2                                     | 0.22              | 1                 |
| 3/1/2008      | NIST-2710 | Mo                   | 0.0174                    | 0.0025      | 19                                      | 1.9               | 1                 |
| 3/1/2008      | NIST-2709 | Mo                   | 0.0062                    | 0.0012      | 2                                       | 0.2               | 1                 |
| 3/1/2008      | SDO-1     | Mo                   | 0.1565                    | 0.0025      | 134                                     | 21                | 2                 |
| 3/1/2008      | BCSS-1    | Cd                   | 0.0162                    | 0.0036      | 0.25                                    | 0.04              | 2                 |
| 3/1/2008      | MAG-1     | Cd                   | 0.0117                    | 0.0039      | 0.2                                     | 0.03              | 2                 |
| 3/1/2008      | NIST-2711 | Cd                   | 0.0144                    | 0.0036      | 41.7                                    | 0.25              | 2                 |
| 3/1/2008      | NIST-2710 | Ba                   | 0.0806                    | 0.0050      | 707                                     | 51                | 2                 |
| 3/1/2008      | MAG-1     | Ba                   | 0.0825                    | 0.0052      | 480                                     | 41                | 2                 |
| 3/1/2008      | NIST-2704 | Ba                   | 0.0580                    | 0.0046      | 414                                     | 12                | 2                 |
| 3/1/2008      | NIST-2709 | Ba                   | 0.0810                    | 0.0044      | 968                                     | 40                | 2                 |
| 3/1/2008      | NIST-2711 | Ba                   | 0.0615                    | 0.0040      | 726                                     | 38                | 2                 |
| 3/1/2008      | SCO-1     | Ba                   | 0.0668                    | 0.0042      | 570                                     | 30                | 2                 |
| 3/1/2008      | SDO-1     | Ba                   | 0.0917                    | 0.0056      | 397                                     | 38                | 2                 |
| 3/1/2008      | NIST-2710 | Hg                   | 0.0108                    | 0.0008      | 32.6                                    | 1.8               | 2                 |
| 3/1/2008      | MAG-1     | Hg                   | 0.0012                    | 0.0003      | 0.02                                    | 0.002             | 1                 |
| 3/1/2008      | NIST-2704 | Hg                   | 0.0009                    | 0.0003      | 1.44                                    | 0.07              | 2                 |
| 3/1/2008      | NIST-2709 | Hg                   | 0.0009                    | 0.0003      | 1.4                                     | 0.08              | 2                 |
| 3/1/2008      | NIST-2711 | Hg                   | 0.0013                    | 0.0003      | 6.25                                    | 0.19              | 2                 |
| 3/1/2008      | SDO-1     | Hg                   | 0.0008                    | 0.0003      | 0.19                                    | 0.08              | 2                 |
| 3/1/2008      | BCSS-1    | Pb                   | 0.0037                    | 0.0004      | 22.7                                    | 3.4               | 2                 |
| 3/1/2008      | MESS-1    | Pb                   | 0.0067                    | 0.0004      | 34                                      | 6.1               | 2                 |
| 3/1/2008      | NIST-2704 | Pb                   | 0.0313                    | 0.0009      | 161                                     | 17                | 2                 |
| 3/1/2008      | NIST-2709 | Pb                   | 0.0037                    | 0.0004      | 18.9                                    | 0.5               | 2                 |
| 3/1/2008      | MAG-1     | Pb                   | 0.0050                    | 0.0004      | 24                                      | 3                 | 2                 |
| 3/1/2008      | NIST-2711 | Pb                   | 0.2381                    | 0.0022      | 1162                                    | 31                | 2                 |
| 3/1/2008      | SCO-1     | Pb                   | 0.0050                    | 0.0004      | 31                                      | 3                 | 2                 |
| 3/1/2008      | SDO-1     | Pb                   | 0.0043                    | 0.0004      | 27.9                                    | 5.2               | 2                 |
| 3/1/2008      | NIST-2710 | U                    | 0.0110                    | 0.0011      | 25                                      | 2.5               | 1                 |
| 3/1/2008      | NIST-2711 | U                    | 0.0026                    | 0.0008      | 2.6                                     | 0.26              | 1                 |
| 3/1/2008      | SDO-1     | U                    | 0.0150                    | 0.0011      | 48.8                                    | 6.5               | 2                 |
| 4/9/2008      | MESS-1    | S-LEAP               | 0.0068                    | 0.0016      | 7200                                    | 500               | 2                 |

| Analysis Date | SRM       | Element <sup>A</sup> | FP-XRF                    |             | Standard reference material information |                   |                   |
|---------------|-----------|----------------------|---------------------------|-------------|-----------------------------------------|-------------------|-------------------|
|               |           |                      | signal (cps) <sup>B</sup> | uncertainty | concentration (ppm)                     | uncertainty (ppm) | flag <sup>C</sup> |
| 4/9/2008      | NIST-2710 | S-LEAP               | 0.0098                    | 0.0020      | 2400                                    | 60                | 2                 |
| 4/9/2008      | SDO-1     | S-LEAP               | 0.0464                    | 0.0027      | 53500                                   | 4400              | 2                 |
| 4/9/2008      | BCSS-1    | Cl-LEAP              | 0.0385                    | 0.0025      | 11200                                   | 500               | 2                 |
| 4/9/2008      | MESS-1    | Cl-LEAP              | 0.0375                    | 0.0024      | 8200                                    | 700               | 2                 |
| 4/9/2008      | MAG-1     | Cl-LEAP              | 0.0973                    | 0.0035      | 31000                                   | 600               | 2                 |
| 4/9/2008      | BCSS-1    | K-LEAP               | 0.2967                    | 0.0048      | 18014                                   | 332               | 2                 |
| 4/9/2008      | MESS-1    | K-LEAP               | 0.2963                    | 0.0048      | 18595                                   | 332               | 2                 |
| 4/9/2008      | NIST-2704 | K-LEAP               | 0.3874                    | 0.0060      | 20000                                   | 400               | 2                 |
| 4/9/2008      | NIST-2709 | K-LEAP               | 0.3220                    | 0.0052      | 20300                                   | 600               | 2                 |
| 4/9/2008      | NIST-2710 | K-LEAP               | 0.3913                    | 0.0064      | 21100                                   | 1100              | 2                 |
| 4/9/2008      | NIST-2711 | K-LEAP               | 0.3982                    | 0.0058      | 24500                                   | 800               | 2                 |
| 4/9/2008      | NIST-2586 | K-LEAP               | 0.1820                    | 0.0043      | 9760                                    | 195.2             | 1                 |
| 4/9/2008      | MAG-1     | K-LEAP               | 0.5137                    | 0.0072      | 29470                                   | 1411              | 2                 |
| 4/9/2008      | SCO-1     | K-LEAP               | 0.3682                    | 0.0056      | 22995                                   | 664               | 2                 |
| 4/9/2008      | SDO-1     | K-LEAP               | 0.5331                    | 0.0077      | 27810                                   | 506               | 2                 |
| 4/9/2008      | BCSS-1    | Ca-LEAP              | 0.1938                    | 0.0045      | 5432                                    | 529               | 2                 |
| 4/9/2008      | MESS-1    | Ca-LEAP              | 0.1525                    | 0.0041      | 4817                                    | 457               | 2                 |
| 4/9/2008      | NIST-2704 | Ca-LEAP              | 0.9999                    | 0.0114      | 26000                                   | 300               | 2                 |
| 4/9/2008      | NIST-2709 | Ca-LEAP              | 0.6793                    | 0.0086      | 18900                                   | 500               | 2                 |
| 4/9/2008      | NIST-2710 | Ca-LEAP              | 0.4413                    | 0.0074      | 12500                                   | 300               | 2                 |
| 4/9/2008      | NIST-2711 | Ca-LEAP              | 1.0230                    | 0.0112      | 28800                                   | 800               | 2                 |
| 4/9/2008      | NIST-2586 | Ca-LEAP              | 0.7524                    | 0.0096      | 22180                                   | 443.6             | 1                 |
| 4/9/2008      | MAG-1     | Ca-LEAP              | 0.3400                    | 0.0064      | 9791                                    | 715               | 2                 |
| 4/9/2008      | SCO-1     | Ca-LEAP              | 0.6947                    | 0.0087      | 18725                                   | 1429              | 2                 |
| 4/9/2008      | SDO-1     | Ca-LEAP              | 0.2757                    | 0.0062      | 7504                                    | 336               | 2                 |
| 4/9/2008      | BCSS-1    | Ti-LEAP              | 0.3862                    | 0.0086      | 4400                                    | 144               | 2                 |
| 4/9/2008      | MESS-1    | Ti-LEAP              | 0.4762                    | 0.0093      | 5425                                    | 168               | 2                 |
| 4/9/2008      | NIST-2704 | Ti-LEAP              | 0.4403                    | 0.0099      | 4570                                    | 180               | 2                 |
| 4/9/2008      | NIST-2709 | Ti-LEAP              | 0.3017                    | 0.0085      | 3420                                    | 240               | 2                 |
| 4/9/2008      | NIST-2710 | Ti-LEAP              | 0.2871                    | 0.0094      | 2830                                    | 100               | 2                 |
| 4/9/2008      | NIST-2711 | Ti-LEAP              | 0.2608                    | 0.0077      | 3060                                    | 230               | 2                 |
| 4/9/2008      | NIST-2586 | Ti-LEAP              | 0.6263                    | 0.0120      | 6050                                    | 665.5             | 1                 |
| 4/9/2008      | MAG-1     | Ti-LEAP              | 0.3925                    | 0.0100      | 4496                                    | 420               | 2                 |
| 4/9/2008      | SCO-1     | Ti-LEAP              | 0.3037                    | 0.0083      | 3776                                    | 360               | 2                 |
| 4/9/2008      | SDO-1     | Ti-LEAP              | 0.4261                    | 0.0111      | 4256                                    | 186               | 2                 |

| Analysis Date | SRM       | Element <sup>A</sup> | FP-XRF                    |             | Standard reference material information |                   |                   |
|---------------|-----------|----------------------|---------------------------|-------------|-----------------------------------------|-------------------|-------------------|
|               |           |                      | signal (cps) <sup>B</sup> | uncertainty | concentration (ppm)                     | uncertainty (ppm) | flag <sup>C</sup> |
| 4/9/2008      | BCSS-1    | Ti                   | 0.0202                    | 0.0007      | 4400                                    | 144               | 2                 |
| 4/9/2008      | MESS-1    | Ti                   | 0.0262                    | 0.0007      | 5425                                    | 168               | 2                 |
| 4/9/2008      | NIST-2704 | Ti                   | 0.0256                    | 0.0008      | 4570                                    | 180               | 2                 |
| 4/9/2008      | NIST-2709 | Ti                   | 0.0177                    | 0.0006      | 3420                                    | 240               | 2                 |
| 4/9/2008      | NIST-2711 | Ti                   | 0.0162                    | 0.0006      | 3060                                    | 230               | 2                 |
| 4/9/2008      | NIST-2586 | Ti                   | 0.0356                    | 0.0009      | 6050                                    | 665.5             | 1                 |
| 4/9/2008      | MAG-1     | Ti                   | 0.0229                    | 0.0008      | 4496                                    | 420               | 2                 |
| 4/9/2008      | SCO-1     | Ti                   | 0.0162                    | 0.0006      | 3776                                    | 360               | 2                 |
| 4/9/2008      | SDO-1     | Ti                   | 0.0228                    | 0.0008      | 4256                                    | 186               | 2                 |
| 4/9/2008      | BCSS-1    | V                    | 0.0016                    | 0.0004      | 93.4                                    | 4.9               | 2                 |
| 4/9/2008      | NIST-2704 | V                    | 0.0020                    | 0.0004      | 95                                      | 4                 | 2                 |
| 4/9/2008      | NIST-2709 | V                    | 0.0029                    | 0.0004      | 112                                     | 5                 | 2                 |
| 4/9/2008      | NIST-2710 | V                    | 0.0021                    | 0.0005      | 76.6                                    | 2.3               | 2                 |
| 4/9/2008      | NIST-2711 | V                    | 0.0018                    | 0.0004      | 81.6                                    | 2.9               | 2                 |
| 4/9/2008      | NIST-2586 | V                    | 0.0022                    | 0.0005      | 160                                     | 16                | 1                 |
| 4/9/2008      | MAG-1     | V                    | 0.0029                    | 0.0005      | 140                                     | 6                 | 2                 |
| 4/9/2008      | SCO-1     | V                    | 0.0019                    | 0.0004      | 130                                     | 13                | 2                 |
| 4/9/2008      | SDO-1     | V                    | 0.0033                    | 0.0005      | 160                                     | 21                | 2                 |
| 4/9/2008      | BCSS-1    | Cr-LEAP              | 0.0369                    | 0.0028      | 123                                     | 14                | 2                 |
| 4/9/2008      | MESS-1    | Cr-LEAP              | 0.0196                    | 0.0025      | 71                                      | 11                | 2                 |
| 4/9/2008      | NIST-2704 | Cr-LEAP              | 0.0461                    | 0.0032      | 135                                     | 5                 | 2                 |
| 4/9/2008      | NIST-2709 | Cr-LEAP              | 0.0379                    | 0.0032      | 130                                     | 4                 | 2                 |
| 4/9/2008      | NIST-2711 | Cr-LEAP              | 0.0186                    | 0.0025      | 47                                      | 4.7               | 1                 |
| 4/9/2008      | NIST-2586 | Cr-LEAP              | 0.0930                    | 0.0041      | 301                                     | 45.15             | 2                 |
| 4/9/2008      | MAG-1     | Cr-LEAP              | 0.0344                    | 0.0035      | 97                                      | 8                 | 2                 |
| 4/9/2008      | SCO-1     | Cr-LEAP              | 0.0249                    | 0.0028      | 68                                      | 5                 | 2                 |
| 4/9/2008      | SDO-1     | Cr-LEAP              | 0.0281                    | 0.0038      | 66.4                                    | 7.6               | 2                 |
| 4/9/2008      | BCSS-1    | Cr                   | 0.0023                    | 0.0004      | 123                                     | 14                | 2                 |
| 4/9/2008      | MESS-1    | Cr                   | 0.0015                    | 0.0004      | 71                                      | 11                | 2                 |
| 4/9/2008      | NIST-2704 | Cr                   | 0.0020                    | 0.0004      | 135                                     | 5                 | 2                 |
| 4/9/2008      | NIST-2709 | Cr                   | 0.0017                    | 0.0004      | 130                                     | 4                 | 2                 |
| 4/9/2008      | NIST-2586 | Cr                   | 0.0048                    | 0.0005      | 301                                     | 45.15             | 2                 |
| 4/9/2008      | MAG-1     | Cr                   | 0.0018                    | 0.0005      | 97                                      | 8                 | 2                 |
| 4/9/2008      | SCO-1     | Cr                   | 0.0012                    | 0.0004      | 68                                      | 5                 | 2                 |
| 4/9/2008      | BCSS-1    | Mn-LEAP              | 0.0531                    | 0.0042      | 229                                     | 15                | 2                 |

| Analysis Date | SRM       | Element <sup>A</sup> | FP-XRF                    |             | Standard reference material information |                   |                   |
|---------------|-----------|----------------------|---------------------------|-------------|-----------------------------------------|-------------------|-------------------|
|               |           |                      | signal (cps) <sup>B</sup> | uncertainty | concentration (ppm)                     | uncertainty (ppm) | flag <sup>C</sup> |
| 4/9/2008      | MESS-1    | Mn-LEAP              | 0.1471                    | 0.0046      | 513                                     | 25                | 2                 |
| 4/9/2008      | NIST-2704 | Mn-LEAP              | 0.1772                    | 0.0054      | 555                                     | 19                | 2                 |
| 4/9/2008      | NIST-2709 | Mn-LEAP              | 0.1764                    | 0.0050      | 538                                     | 17                | 2                 |
| 4/9/2008      | NIST-2711 | Mn-LEAP              | 0.2069                    | 0.0050      | 638                                     | 28                | 2                 |
| 4/9/2008      | NIST-2586 | Mn-LEAP              | 0.3427                    | 0.0071      | 1000                                    | 20                | 1                 |
| 4/9/2008      | MAG-1     | Mn-LEAP              | 0.2512                    | 0.0063      | 759                                     | 70                | 2                 |
| 4/9/2008      | SCO-1     | Mn-LEAP              | 0.1057                    | 0.0046      | 410                                     | 30                | 2                 |
| 4/9/2008      | SDO-1     | Mn-LEAP              | 0.0627                    | 0.0059      | 325                                     | 39                | 2                 |
| 4/9/2008      | BCSS-1    | Mn                   | 0.0037                    | 0.0005      | 229                                     | 15                | 2                 |
| 4/9/2008      | MESS-1    | Mn                   | 0.0112                    | 0.0006      | 513                                     | 25                | 2                 |
| 4/9/2008      | NIST-2704 | Mn                   | 0.0107                    | 0.0007      | 555                                     | 19                | 2                 |
| 4/9/2008      | NIST-2709 | Mn                   | 0.0095                    | 0.0006      | 538                                     | 17                | 2                 |
| 4/9/2008      | NIST-2711 | Mn                   | 0.0123                    | 0.0006      | 638                                     | 28                | 2                 |
| 4/9/2008      | NIST-2586 | Mn                   | 0.0201                    | 0.0008      | 1000                                    | 20                | 1                 |
| 4/9/2008      | MAG-1     | Mn                   | 0.0138                    | 0.0007      | 759                                     | 70                | 2                 |
| 4/9/2008      | SCO-1     | Mn                   | 0.0063                    | 0.0006      | 410                                     | 30                | 2                 |
| 4/9/2008      | SDO-1     | Mn                   | 0.0054                    | 0.0007      | 325                                     | 39                | 2                 |
| 4/9/2008      | BCSS-1    | Fe-LEAP              | 17.1854                   | 0.1309      | 32873                                   | 979               | 2                 |
| 4/9/2008      | MESS-1    | Fe-LEAP              | 15.5437                   | 0.1189      | 30495                                   | 1749              | 2                 |
| 4/9/2008      | NIST-2704 | Fe-LEAP              | 21.3361                   | 0.1700      | 41100                                   | 1000              | 2                 |
| 4/9/2008      | NIST-2709 | Fe-LEAP              | 18.8618                   | 0.1466      | 35000                                   | 1100              | 2                 |
| 4/9/2008      | NIST-2711 | Fe-LEAP              | 14.3060                   | 0.1113      | 28900                                   | 600               | 2                 |
| 4/9/2008      | NIST-2586 | Fe-LEAP              | 27.4358                   | 0.2232      | 51610                                   | 1032.2            | 1                 |
| 4/9/2008      | MAG-1     | Fe-LEAP              | 26.0064                   | 0.2113      | 47561                                   | 4197              | 2                 |
| 4/9/2008      | SCO-1     | Fe-LEAP              | 18.4133                   | 0.1439      | 35881                                   | 1259              | 2                 |
| 4/9/2008      | SDO-1     | Fe-LEAP              | 35.0529                   | 0.2965      | 65327                                   | 1469              | 2                 |
| 4/9/2008      | BCSS-1    | Fe                   | 1.1187                    | 0.0057      | 32873                                   | 979               | 2                 |
| 4/9/2008      | MESS-1    | Fe                   | 1.0198                    | 0.0053      | 30495                                   | 1749              | 2                 |
| 4/9/2008      | NIST-2704 | Fe                   | 1.4497                    | 0.0073      | 41100                                   | 1000              | 2                 |
| 4/9/2008      | NIST-2709 | Fe                   | 1.1856                    | 0.0060      | 35000                                   | 1100              | 2                 |
| 4/9/2008      | NIST-2711 | Fe                   | 0.9385                    | 0.0051      | 28900                                   | 600               | 2                 |
| 4/9/2008      | NIST-2586 | Fe                   | 1.8977                    | 0.0093      | 51610                                   | 1032.2            | 1                 |
| 4/9/2008      | MAG-1     | Fe                   | 1.7644                    | 0.0088      | 47561                                   | 4197              | 2                 |
| 4/9/2008      | SCO-1     | Fe                   | 1.1845                    | 0.0060      | 35881                                   | 1259              | 2                 |
| 4/9/2008      | SDO-1     | Fe                   | 2.3945                    | 0.0114      | 65327                                   | 1469              | 2                 |

| Analysis Date | SRM       | Element <sup>A</sup> | FP-XRF                    |             | Standard reference material information |                   |                   |
|---------------|-----------|----------------------|---------------------------|-------------|-----------------------------------------|-------------------|-------------------|
|               |           |                      | signal (cps) <sup>B</sup> | uncertainty | concentration (ppm)                     | uncertainty (ppm) | flag <sup>C</sup> |
| 4/9/2008      | BCSS-1    | Co                   | 0.0143                    | 0.0017      | 11.4                                    | 2.1               | 2                 |
| 4/9/2008      | MESS-1    | Co                   | 0.0140                    | 0.0016      | 10.8                                    | 1.9               | 2                 |
| 4/9/2008      | NIST-2704 | Co                   | 0.0170                    | 0.0020      | 14                                      | 0.6               | 2                 |
| 4/9/2008      | NIST-2709 | Co                   | 0.0165                    | 0.0017      | 13.4                                    | 0.7               | 2                 |
| 4/9/2008      | NIST-2711 | Co                   | 0.0140                    | 0.0016      | 10                                      | 1                 | 1                 |
| 4/9/2008      | NIST-2586 | Co                   | 0.0233                    | 0.0023      | 35                                      | 3.5               | 1                 |
| 4/9/2008      | MAG-1     | Co                   | 0.0237                    | 0.0022      | 20                                      | 1.6               | 2                 |
| 4/9/2008      | SCO-1     | Co                   | 0.0188                    | 0.0018      | 11                                      | 0.8               | 2                 |
| 4/9/2008      | SDO-1     | Co                   | 0.0317                    | 0.0026      | 46.8                                    | 6.3               | 2                 |
| 4/9/2008      | BCSS-1    | Ni                   | 0.0026                    | 0.0006      | 55.3                                    | 3.6               | 2                 |
| 4/9/2008      | NIST-2704 | Ni                   | 0.0029                    | 0.0006      | 44.1                                    | 3                 | 2                 |
| 4/9/2008      | NIST-2709 | Ni                   | 0.0046                    | 0.0006      | 88                                      | 5                 | 2                 |
| 4/9/2008      | NIST-2586 | Ni                   | 0.0042                    | 0.0007      | 75                                      | 7.5               | 1                 |
| 4/9/2008      | SDO-1     | Ni                   | 0.0025                    | 0.0008      | 99.5                                    | 9.9               | 2                 |
| 4/9/2008      | BCSS-1    | Cu                   | 0.0013                    | 0.0004      | 18.5                                    | 2.7               | 2                 |
| 4/9/2008      | MESS-1    | Cu                   | 0.0021                    | 0.0004      | 25.1                                    | 3.8               | 2                 |
| 4/9/2008      | NIST-2704 | Cu                   | 0.0096                    | 0.0005      | 98.6                                    | 5                 | 2                 |
| 4/9/2008      | NIST-2709 | Cu                   | 0.0036                    | 0.0004      | 34.6                                    | 0.7               | 2                 |
| 4/9/2008      | NIST-2711 | Cu                   | 0.0117                    | 0.0005      | 114                                     | 2                 | 2                 |
| 4/9/2008      | NIST-2586 | Cu                   | 0.0063                    | 0.0005      | 81                                      | 8.1               | 1                 |
| 4/9/2008      | MAG-1     | Cu                   | 0.0023                    | 0.0005      | 30                                      | 3                 | 2                 |
| 4/9/2008      | SCO-1     | Cu                   | 0.0029                    | 0.0004      | 29                                      | 2                 | 2                 |
| 4/9/2008      | SDO-1     | Cu                   | 0.0043                    | 0.0005      | 60.2                                    | 9.6               | 2                 |
| 4/9/2008      | BCSS-1    | Zn                   | 0.0142                    | 0.0004      | 119                                     | 12                | 2                 |
| 4/9/2008      | MESS-1    | Zn                   | 0.0229                    | 0.0006      | 191                                     | 17                | 2                 |
| 4/9/2008      | NIST-2704 | Zn                   | 0.0592                    | 0.0010      | 438                                     | 12                | 2                 |
| 4/9/2008      | NIST-2709 | Zn                   | 0.0126                    | 0.0004      | 106                                     | 3                 | 2                 |
| 4/9/2008      | NIST-2711 | Zn                   | 0.0459                    | 0.0009      | 350.4                                   | 4.8               | 2                 |
| 4/9/2008      | NIST-2586 | Zn                   | 0.0463                    | 0.0009      | 352                                     | 17.6              | 1                 |
| 4/9/2008      | MAG-1     | Zn                   | 0.0174                    | 0.0006      | 130                                     | 6                 | 2                 |
| 4/9/2008      | SCO-1     | Zn                   | 0.0129                    | 0.0004      | 100                                     | 8                 | 2                 |
| 4/9/2008      | SDO-1     | Zn                   | 0.0061                    | 0.0004      | 64.1                                    | 6.9               | 2                 |
| 4/9/2008      | BCSS-1    | As                   | 0.0027                    | 0.0005      | 11.1                                    | 1.4               | 2                 |
| 4/9/2008      | MESS-1    | As                   | 0.0021                    | 0.0005      | 10.6                                    | 1.2               | 2                 |
| 4/9/2008      | NIST-2704 | As                   | 0.0048                    | 0.0011      | 23.4                                    | 0.8               | 2                 |

| Analysis Date | SRM       | Element <sup>A</sup> | FP-XRF                    |             | Standard reference material information |                   |                   |
|---------------|-----------|----------------------|---------------------------|-------------|-----------------------------------------|-------------------|-------------------|
|               |           |                      | signal (cps) <sup>B</sup> | uncertainty | concentration (ppm)                     | uncertainty (ppm) | flag <sup>C</sup> |
| 4/9/2008      | NIST-2709 | As                   | 0.0046                    | 0.0005      | 17.7                                    | 0.8               | 2                 |
| 4/9/2008      | NIST-2710 | As                   | 0.1437                    | 0.0062      | 626                                     | 38                | 2                 |
| 4/9/2008      | NIST-2711 | As                   | 0.0153                    | 0.0024      | 105                                     | 8                 | 2                 |
| 4/9/2008      | MAG-1     | As                   | 0.0024                    | 0.0005      | 9.2                                     | 0.92              | 1                 |
| 4/9/2008      | SCO-1     | As                   | 0.0024                    | 0.0005      | 12                                      | 1                 | 2                 |
| 4/9/2008      | SDO-1     | As                   | 0.0198                    | 0.0008      | 68.5                                    | 8.6               | 2                 |
| 4/9/2008      | NIST-2704 | Br                   | 0.0030                    | 0.0004      | 7                                       | 0.7               | 1                 |
| 4/9/2008      | NIST-2710 | Br                   | 0.0078                    | 0.0013      | 6                                       | 0.6               | 1                 |
| 4/9/2008      | NIST-2711 | Br                   | 0.0035                    | 0.0004      | 5                                       | 0.5               | 1                 |
| 4/9/2008      | MAG-1     | Br                   | 0.1089                    | 0.0013      | 250                                     | 25                | 1                 |
| 4/9/2008      | NIST-2704 | Rb                   | 0.0685                    | 0.0014      | 100                                     | 10                | 1                 |
| 4/9/2008      | NIST-2709 | Rb                   | 0.0600                    | 0.0014      | 96                                      | 9.6               | 1                 |
| 4/9/2008      | NIST-2710 | Rb                   | 0.0812                    | 0.0021      | 120                                     | 12                | 1                 |
| 4/9/2008      | NIST-2711 | Rb                   | 0.0727                    | 0.0014      | 110                                     | 11                | 1                 |
| 4/9/2008      | MAG-1     | Rb                   | 0.0960                    | 0.0014      | 150                                     | 6                 | 2                 |
| 4/9/2008      | SCO-1     | Rb                   | 0.0727                    | 0.0014      | 110                                     | 4                 | 2                 |
| 4/9/2008      | SDO-1     | Rb                   | 0.0791                    | 0.0014      | 126                                     | 3.9               | 2                 |
| 4/9/2008      | BCSS-1    | Sr                   | 0.0791                    | 0.0016      | 96                                      | 9.6               | 1                 |
| 4/9/2008      | MESS-1    | Sr                   | 0.0682                    | 0.0008      | 89                                      | 8.9               | 1                 |
| 4/9/2008      | NIST-2704 | Sr                   | 0.1011                    | 0.0016      | 130                                     | 13                | 1                 |
| 4/9/2008      | NIST-2709 | Sr                   | 0.1693                    | 0.0016      | 231                                     | 2                 | 2                 |
| 4/9/2008      | NIST-2710 | Sr                   | 0.2594                    | 0.0024      | 330                                     | 33                | 1                 |
| 4/9/2008      | NIST-2711 | Sr                   | 0.1849                    | 0.0016      | 245.3                                   | 0.7               | 2                 |
| 4/9/2008      | NIST-2586 | Sr                   | 0.0619                    | 0.0008      | 84.1                                    | 8.41              | 1                 |
| 4/9/2008      | MAG-1     | Sr                   | 0.1081                    | 0.0016      | 150                                     | 15                | 2                 |
| 4/9/2008      | SCO-1     | Sr                   | 0.1277                    | 0.0016      | 170                                     | 16                | 2                 |
| 4/9/2008      | SDO-1     | Sr                   | 0.0564                    | 0.0008      | 75.1                                    | 11                | 2                 |
| 4/9/2008      | NIST-2704 | Zr                   | 0.2992                    | 0.0023      | 300                                     | 30                | 1                 |
| 4/9/2008      | NIST-2709 | Zr                   | 0.1531                    | 0.0023      | 160                                     | 16                | 1                 |
| 4/9/2008      | NIST-2711 | Zr                   | 0.2700                    | 0.0023      | 230                                     | 23                | 1                 |
| 4/9/2008      | MAG-1     | Zr                   | 0.1286                    | 0.0023      | 130                                     | 13                | 2                 |
| 4/9/2008      | SCO-1     | Zr                   | 0.1765                    | 0.0023      | 160                                     | 30                | 2                 |
| 4/9/2008      | SDO-1     | Zr                   | 0.1613                    | 0.0023      | 165                                     | 24                | 2                 |
| 4/9/2008      | NIST-2704 | Cd                   | 0.0117                    | 0.0039      | 3.45                                    | 0.22              | 2                 |
| 4/9/2008      | NIST-2710 | Cd                   | 0.0183                    | 0.0042      | 21.8                                    | 0.2               | 2                 |

| Analysis Date | SRM       | Element <sup>A</sup> | FP-XRF                    |             | Standard reference material information |                   |                   |
|---------------|-----------|----------------------|---------------------------|-------------|-----------------------------------------|-------------------|-------------------|
|               |           |                      | signal (cps) <sup>B</sup> | uncertainty | concentration (ppm)                     | uncertainty (ppm) | flag <sup>C</sup> |
| 4/9/2008      | NIST-2711 | Cd                   | 0.0258                    | 0.0036      | 41.7                                    | 0.25              | 2                 |
| 4/9/2008      | NIST-2586 | Cd                   | 0.0144                    | 0.0039      | 2.71                                    | 0.542             | 2                 |
| 4/9/2008      | NIST-2704 | Ba                   | 0.0647                    | 0.0048      | 414                                     | 12                | 2                 |
| 4/9/2008      | NIST-2709 | Ba                   | 0.0856                    | 0.0044      | 968                                     | 40                | 2                 |
| 4/9/2008      | NIST-2710 | Ba                   | 0.0766                    | 0.0050      | 707                                     | 51                | 2                 |
| 4/9/2008      | NIST-2711 | Ba                   | 0.0641                    | 0.0040      | 726                                     | 38                | 2                 |
| 4/9/2008      | NIST-2586 | Ba                   | 0.0806                    | 0.0056      | 413                                     | 16.52             | 1                 |
| 4/9/2008      | MAG-1     | Ba                   | 0.0829                    | 0.0052      | 480                                     | 41                | 2                 |
| 4/9/2008      | SCO-1     | Ba                   | 0.0693                    | 0.0042      | 570                                     | 30                | 2                 |
| 4/9/2008      | SDO-1     | Ba                   | 0.0904                    | 0.0057      | 397                                     | 38                | 2                 |
| 4/9/2008      | NIST-2704 | Hg                   | 0.0011                    | 0.0003      | 1.44                                    | 0.07              | 2                 |
| 4/9/2008      | NIST-2710 | Hg                   | 0.0100                    | 0.0008      | 32.6                                    | 1.8               | 2                 |
| 4/9/2008      | NIST-2711 | Hg                   | 0.0017                    | 0.0003      | 6.25                                    | 0.19              | 2                 |
| 4/9/2008      | MAG-1     | Hg                   | 0.0011                    | 0.0003      | 0.02                                    | 0.002             | 1                 |
| 4/9/2008      | BCSS-1    | Pb                   | 0.0047                    | 0.0004      | 22.7                                    | 3.4               | 2                 |
| 4/9/2008      | MESS-1    | Pb                   | 0.0071                    | 0.0004      | 34                                      | 6.1               | 2                 |
| 4/9/2008      | NIST-2704 | Pb                   | 0.0326                    | 0.0009      | 161                                     | 17                | 2                 |
| 4/9/2008      | NIST-2709 | Pb                   | 0.0032                    | 0.0004      | 18.9                                    | 0.5               | 2                 |
| 4/9/2008      | NIST-2711 | Pb                   | 0.2379                    | 0.0022      | 1162                                    | 31                | 2                 |
| 4/9/2008      | NIST-2586 | Pb                   | 0.0894                    | 0.0013      | 432                                     | 17.28             | 2                 |
| 4/9/2008      | MAG-1     | Pb                   | 0.0050                    | 0.0004      | 24                                      | 3                 | 2                 |
| 4/9/2008      | SCO-1     | Pb                   | 0.0063                    | 0.0004      | 31                                      | 3                 | 2                 |
| 4/9/2008      | SDO-1     | Pb                   | 0.0047                    | 0.0004      | 27.9                                    | 5.2               | 2                 |
| 6/10/2008     | BCSS-1    | S-LEAP               | 0.0058                    | 0.0016      | 3600                                    | 500               | 2                 |
| 6/10/2008     | MESS-1    | S-LEAP               | 0.0094                    | 0.0017      | 7200                                    | 500               | 2                 |
| 6/10/2008     | NIST-2710 | S-LEAP               | 0.0085                    | 0.0020      | 2400                                    | 60                | 2                 |
| 6/10/2008     | SDO-1     | S-LEAP               | 0.0414                    | 0.0027      | 53500                                   | 4400              | 2                 |
| 6/10/2008     | BCSS-1    | Cl-LEAP              | 0.0426                    | 0.0026      | 11200                                   | 500               | 2                 |
| 6/10/2008     | MESS-1    | Cl-LEAP              | 0.0434                    | 0.0025      | 8200                                    | 700               | 2                 |
| 6/10/2008     | MAG-1     | Cl-LEAP              | 0.0883                    | 0.0035      | 31000                                   | 600               | 2                 |
| 6/10/2008     | BCSS-1    | K-LEAP               | 0.2980                    | 0.0049      | 18014                                   | 332               | 2                 |
| 6/10/2008     | MESS-1    | K-LEAP               | 0.2960                    | 0.0048      | 18595                                   | 332               | 2                 |
| 6/10/2008     | NIST-2704 | K-LEAP               | 0.3844                    | 0.0061      | 20000                                   | 400               | 2                 |
| 6/10/2008     | NIST-2709 | K-LEAP               | 0.3030                    | 0.0050      | 20300                                   | 600               | 2                 |
| 6/10/2008     | NIST-2709 | K-LEAP               | 0.3334                    | 0.0053      | 20300                                   | 600               | 2                 |



| Analysis Date | SRM       | Element <sup>A</sup> | FP-XRF                    |             | Standard reference material information |                   |                   |
|---------------|-----------|----------------------|---------------------------|-------------|-----------------------------------------|-------------------|-------------------|
|               |           |                      | signal (cps) <sup>B</sup> | uncertainty | concentration (ppm)                     | uncertainty (ppm) | flag <sup>C</sup> |
| 6/10/2008     | NIST-2709 | K-LEAP               | 0.3300                    | 0.0052      | 20300                                   | 600               | 2                 |
| 6/10/2008     | NIST-2710 | K-LEAP               | 0.3893                    | 0.0064      | 21100                                   | 1100              | 2                 |
| 6/10/2008     | NIST-2586 | K-LEAP               | 0.1806                    | 0.0044      | 9760                                    | 195.2             | 1                 |
| 6/10/2008     | MAG-1     | K-LEAP               | 0.5256                    | 0.0074      | 29470                                   | 1411              | 2                 |
| 6/10/2008     | SDO-1     | K-LEAP               | 0.5165                    | 0.0075      | 27810                                   | 506               | 2                 |
| 6/10/2008     | BCSS-1    | Ca-LEAP              | 0.1851                    | 0.0045      | 5432                                    | 529               | 2                 |
| 6/10/2008     | MESS-1    | Ca-LEAP              | 0.1521                    | 0.0042      | 4817                                    | 457               | 2                 |
| 6/10/2008     | NIST-2704 | Ca-LEAP              | 1.0319                    | 0.0119      | 26000                                   | 300               | 2                 |
| 6/10/2008     | NIST-2709 | Ca-LEAP              | 0.6499                    | 0.0083      | 18900                                   | 500               | 2                 |
| 6/10/2008     | NIST-2709 | Ca-LEAP              | 0.6895                    | 0.0086      | 18900                                   | 500               | 2                 |
| 6/10/2008     | NIST-2709 | Ca-LEAP              | 0.6619                    | 0.0084      | 18900                                   | 500               | 2                 |
| 6/10/2008     | NIST-2710 | Ca-LEAP              | 0.4476                    | 0.0076      | 12500                                   | 300               | 2                 |
| 6/10/2008     | NIST-2586 | Ca-LEAP              | 0.7735                    | 0.0099      | 22180                                   | 443.6             | 1                 |
| 6/10/2008     | MAG-1     | Ca-LEAP              | 0.3379                    | 0.0065      | 9791                                    | 715               | 2                 |
| 6/10/2008     | SDO-1     | Ca-LEAP              | 0.2747                    | 0.0062      | 7504                                    | 336               | 2                 |
| 6/10/2008     | BCSS-1    | Ti-LEAP              | 0.3900                    | 0.0089      | 4400                                    | 144               | 2                 |
| 6/10/2008     | MESS-1    | Ti-LEAP              | 0.4618                    | 0.0093      | 5425                                    | 168               | 2                 |
| 6/10/2008     | NIST-2704 | Ti-LEAP              | 0.4398                    | 0.0102      | 4570                                    | 180               | 2                 |
| 6/10/2008     | NIST-2709 | Ti-LEAP              | 0.2895                    | 0.0083      | 3420                                    | 240               | 2                 |
| 6/10/2008     | NIST-2709 | Ti-LEAP              | 0.3088                    | 0.0085      | 3420                                    | 240               | 2                 |
| 6/10/2008     | NIST-2709 | Ti-LEAP              | 0.3100                    | 0.0085      | 3420                                    | 240               | 2                 |
| 6/10/2008     | NIST-2710 | Ti-LEAP              | 0.2771                    | 0.0094      | 2830                                    | 100               | 2                 |
| 6/10/2008     | NIST-2586 | Ti-LEAP              | 0.6106                    | 0.0123      | 6050                                    | 665.5             | 1                 |
| 6/10/2008     | MAG-1     | Ti-LEAP              | 0.3966                    | 0.0104      | 4496                                    | 420               | 2                 |
| 6/10/2008     | SDO-1     | Ti-LEAP              | 0.4089                    | 0.0109      | 4256                                    | 186               | 2                 |
| 6/10/2008     | BCSS-1    | Ti                   | 0.0206                    | 0.0007      | 4400                                    | 144               | 2                 |
| 6/10/2008     | MESS-1    | Ti                   | 0.0245                    | 0.0007      | 5425                                    | 168               | 2                 |
| 6/10/2008     | NIST-2704 | Ti                   | 0.0247                    | 0.0008      | 4570                                    | 180               | 2                 |
| 6/10/2008     | NIST-2709 | Ti                   | 0.0164                    | 0.0006      | 3420                                    | 240               | 2                 |
| 6/10/2008     | NIST-2709 | Ti                   | 0.0177                    | 0.0006      | 3420                                    | 240               | 2                 |
| 6/10/2008     | NIST-2709 | Ti                   | 0.0183                    | 0.0006      | 3420                                    | 240               | 2                 |
| 6/10/2008     | NIST-2586 | Ti                   | 0.0358                    | 0.0009      | 6050                                    | 665.5             | 1                 |
| 6/10/2008     | MAG-1     | Ti                   | 0.0221                    | 0.0008      | 4496                                    | 420               | 2                 |
| 6/10/2008     | SDO-1     | Ti                   | 0.0230                    | 0.0008      | 4256                                    | 186               | 2                 |
| 6/10/2008     | BCSS-1    | V                    | 0.0015                    | 0.0004      | 93.4                                    | 4.9               | 2                 |

| Analysis Date | SRM       | Element <sup>A</sup> | FP-XRF                    |             | Standard reference material information |                   |                   |
|---------------|-----------|----------------------|---------------------------|-------------|-----------------------------------------|-------------------|-------------------|
|               |           |                      | signal (cps) <sup>B</sup> | uncertainty | concentration (ppm)                     | uncertainty (ppm) | flag <sup>C</sup> |
| 6/10/2008     | MESS-1    | V                    | 0.0016                    | 0.0004      | 72.4                                    | 17                | 2                 |
| 6/10/2008     | NIST-2704 | V                    | 0.0021                    | 0.0005      | 95                                      | 4                 | 2                 |
| 6/10/2008     | NIST-2709 | V                    | 0.0029                    | 0.0004      | 112                                     | 5                 | 2                 |
| 6/10/2008     | NIST-2709 | V                    | 0.0026                    | 0.0004      | 112                                     | 5                 | 2                 |
| 6/10/2008     | NIST-2709 | V                    | 0.0024                    | 0.0004      | 112                                     | 5                 | 2                 |
| 6/10/2008     | NIST-2710 | V                    | 0.0025                    | 0.0005      | 76.6                                    | 2.3               | 2                 |
| 6/10/2008     | MAG-1     | V                    | 0.0029                    | 0.0005      | 140                                     | 6                 | 2                 |
| 6/10/2008     | SDO-1     | V                    | 0.0023                    | 0.0005      | 160                                     | 21                | 2                 |
| 6/10/2008     | BCSS-1    | Cr-LEAP              | 0.0457                    | 0.0028      | 123                                     | 14                | 2                 |
| 6/10/2008     | MESS-1    | Cr-LEAP              | 0.0192                    | 0.0025      | 71                                      | 11                | 2                 |
| 6/10/2008     | NIST-2704 | Cr-LEAP              | 0.0413                    | 0.0032      | 135                                     | 5                 | 2                 |
| 6/10/2008     | NIST-2709 | Cr-LEAP              | 0.0350                    | 0.0028      | 130                                     | 4                 | 2                 |
| 6/10/2008     | NIST-2709 | Cr-LEAP              | 0.0448                    | 0.0032      | 130                                     | 4                 | 2                 |
| 6/10/2008     | NIST-2709 | Cr-LEAP              | 0.0375                    | 0.0028      | 130                                     | 4                 | 2                 |
| 6/10/2008     | NIST-2586 | Cr-LEAP              | 0.0839                    | 0.0041      | 301                                     | 45.15             | 2                 |
| 6/10/2008     | MAG-1     | Cr-LEAP              | 0.0325                    | 0.0035      | 97                                      | 8                 | 2                 |
| 6/10/2008     | SDO-1     | Cr-LEAP              | 0.0240                    | 0.0038      | 66.4                                    | 7.6               | 2                 |
| 6/10/2008     | BCSS-1    | Cr                   | 0.0033                    | 0.0004      | 123                                     | 14                | 2                 |
| 6/10/2008     | MESS-1    | Cr                   | 0.0014                    | 0.0004      | 71                                      | 11                | 2                 |
| 6/10/2008     | NIST-2704 | Cr                   | 0.0027                    | 0.0005      | 135                                     | 5                 | 2                 |
| 6/10/2008     | NIST-2709 | Cr                   | 0.0024                    | 0.0004      | 130                                     | 4                 | 2                 |
| 6/10/2008     | NIST-2709 | Cr                   | 0.0020                    | 0.0004      | 130                                     | 4                 | 2                 |
| 6/10/2008     | NIST-2709 | Cr                   | 0.0021                    | 0.0004      | 130                                     | 4                 | 2                 |
| 6/10/2008     | NIST-2710 | Cr                   | 0.0019                    | 0.0006      | 39                                      | 3.9               | 1                 |
| 6/10/2008     | NIST-2586 | Cr                   | 0.0053                    | 0.0005      | 301                                     | 45.15             | 2                 |
| 6/10/2008     | MAG-1     | Cr                   | 0.0018                    | 0.0005      | 97                                      | 8                 | 2                 |
| 6/10/2008     | SDO-1     | Cr                   | 0.0020                    | 0.0005      | 66.4                                    | 7.6               | 2                 |
| 6/10/2008     | BCSS-1    | Mn-LEAP              | 0.0711                    | 0.0042      | 229                                     | 15                | 2                 |
| 6/10/2008     | MESS-1    | Mn-LEAP              | 0.1551                    | 0.0046      | 513                                     | 25                | 2                 |
| 6/10/2008     | NIST-2704 | Mn-LEAP              | 0.2136                    | 0.0059      | 555                                     | 19                | 2                 |
| 6/10/2008     | NIST-2709 | Mn-LEAP              | 0.1781                    | 0.0050      | 538                                     | 17                | 2                 |
| 6/10/2008     | NIST-2709 | Mn-LEAP              | 0.1935                    | 0.0054      | 538                                     | 17                | 2                 |
| 6/10/2008     | NIST-2709 | Mn-LEAP              | 0.1835                    | 0.0050      | 538                                     | 17                | 2                 |
| 6/10/2008     | NIST-2586 | Mn-LEAP              | 0.3678                    | 0.0075      | 1000                                    | 20                | 1                 |
| 6/10/2008     | MAG-1     | Mn-LEAP              | 0.2792                    | 0.0067      | 759                                     | 70                | 2                 |

| Analysis Date | SRM       | Element <sup>A</sup> | FP-XRF                    |             | Standard reference material information |                   |                   |
|---------------|-----------|----------------------|---------------------------|-------------|-----------------------------------------|-------------------|-------------------|
|               |           |                      | signal (cps) <sup>B</sup> | uncertainty | concentration (ppm)                     | uncertainty (ppm) | flag <sup>C</sup> |
| 6/10/2008     | SDO-1     | Mn-LEAP              | 0.0899                    | 0.0059      | 325                                     | 39                | 2                 |
| 6/10/2008     | BCSS-1    | Mn                   | 0.0059                    | 0.0006      | 229                                     | 15                | 2                 |
| 6/10/2008     | MESS-1    | Mn                   | 0.0095                    | 0.0006      | 513                                     | 25                | 2                 |
| 6/10/2008     | NIST-2704 | Mn                   | 0.0135                    | 0.0007      | 555                                     | 19                | 2                 |
| 6/10/2008     | NIST-2709 | Mn                   | 0.0101                    | 0.0006      | 538                                     | 17                | 2                 |
| 6/10/2008     | NIST-2709 | Mn                   | 0.0118                    | 0.0006      | 538                                     | 17                | 2                 |
| 6/10/2008     | NIST-2709 | Mn                   | 0.0107                    | 0.0006      | 538                                     | 17                | 2                 |
| 6/10/2008     | NIST-2586 | Mn                   | 0.0217                    | 0.0009      | 1000                                    | 20                | 1                 |
| 6/10/2008     | MAG-1     | Mn                   | 0.0166                    | 0.0008      | 759                                     | 70                | 2                 |
| 6/10/2008     | SDO-1     | Mn                   | 0.0070                    | 0.0008      | 325                                     | 39                | 2                 |
| 6/10/2008     | BCSS-1    | Fe-LEAP              | 17.3423                   | 0.1347      | 32873                                   | 979               | 2                 |
| 6/10/2008     | MESS-1    | Fe-LEAP              | 15.6572                   | 0.1211      | 30495                                   | 1749              | 2                 |
| 6/10/2008     | NIST-2704 | Fe-LEAP              | 21.9649                   | 0.1792      | 41100                                   | 1000              | 2                 |
| 6/10/2008     | NIST-2709 | Fe-LEAP              | 18.2797                   | 0.1417      | 35000                                   | 1100              | 2                 |
| 6/10/2008     | NIST-2709 | Fe-LEAP              | 18.9607                   | 0.1466      | 35000                                   | 1100              | 2                 |
| 6/10/2008     | NIST-2709 | Fe-LEAP              | 18.6430                   | 0.1450      | 35000                                   | 1100              | 2                 |
| 6/10/2008     | NIST-2586 | Fe-LEAP              | 27.5004                   | 0.2270      | 51610                                   | 1032.2            | 1                 |
| 6/10/2008     | MAG-1     | Fe-LEAP              | 26.3779                   | 0.2189      | 47561                                   | 4197              | 2                 |
| 6/10/2008     | SDO-1     | Fe-LEAP              | 34.3974                   | 0.2905      | 65327                                   | 1469              | 2                 |
| 6/10/2008     | BCSS-1    | Fe                   | 1.0977                    | 0.0056      | 32873                                   | 979               | 2                 |
| 6/10/2008     | MESS-1    | Fe                   | 1.0027                    | 0.0053      | 30495                                   | 1749              | 2                 |
| 6/10/2008     | NIST-2704 | Fe                   | 1.4499                    | 0.0074      | 41100                                   | 1000              | 2                 |
| 6/10/2008     | NIST-2709 | Fe                   | 1.1400                    | 0.0058      | 35000                                   | 1100              | 2                 |
| 6/10/2008     | NIST-2709 | Fe                   | 1.1867                    | 0.0059      | 35000                                   | 1100              | 2                 |
| 6/10/2008     | NIST-2709 | Fe                   | 1.1906                    | 0.0060      | 35000                                   | 1100              | 2                 |
| 6/10/2008     | NIST-2586 | Fe                   | 1.8602                    | 0.0092      | 51610                                   | 1032.2            | 1                 |
| 6/10/2008     | MAG-1     | Fe                   | 1.7334                    | 0.0087      | 47561                                   | 4197              | 2                 |
| 6/10/2008     | SDO-1     | Fe                   | 2.3622                    | 0.0114      | 65327                                   | 1469              | 2                 |
| 6/10/2008     | BCSS-1    | Co                   | 0.0148                    | 0.0017      | 11.4                                    | 2.1               | 2                 |
| 6/10/2008     | MESS-1    | Co                   | 0.0134                    | 0.0016      | 10.8                                    | 1.9               | 2                 |
| 6/10/2008     | NIST-2704 | Co                   | 0.0192                    | 0.0020      | 14                                      | 0.6               | 2                 |
| 6/10/2008     | NIST-2709 | Co                   | 0.0140                    | 0.0017      | 13.4                                    | 0.7               | 2                 |
| 6/10/2008     | NIST-2709 | Co                   | 0.0157                    | 0.0017      | 13.4                                    | 0.7               | 2                 |
| 6/10/2008     | NIST-2709 | Co                   | 0.0180                    | 0.0018      | 13.4                                    | 0.7               | 2                 |
| 6/10/2008     | NIST-2586 | Co                   | 0.0291                    | 0.0023      | 35                                      | 3.5               | 1                 |

| Analysis Date | SRM       | Element <sup>A</sup> | FP-XRF                    |             | Standard reference material information |                   |                   |
|---------------|-----------|----------------------|---------------------------|-------------|-----------------------------------------|-------------------|-------------------|
|               |           |                      | signal (cps) <sup>B</sup> | uncertainty | concentration (ppm)                     | uncertainty (ppm) | flag <sup>C</sup> |
| 6/10/2008     | MAG-1     | Co                   | 0.0235                    | 0.0022      | 20                                      | 1.6               | 2                 |
| 6/10/2008     | SDO-1     | Co                   | 0.0326                    | 0.0026      | 46.8                                    | 6.3               | 2                 |
| 6/10/2008     | BCSS-1    | Ni                   | 0.0026                    | 0.0006      | 55.3                                    | 3.6               | 2                 |
| 6/10/2008     | NIST-2704 | Ni                   | 0.0025                    | 0.0006      | 44.1                                    | 3                 | 2                 |
| 6/10/2008     | NIST-2709 | Ni                   | 0.0050                    | 0.0006      | 88                                      | 5                 | 2                 |
| 6/10/2008     | NIST-2709 | Ni                   | 0.0038                    | 0.0006      | 88                                      | 5                 | 2                 |
| 6/10/2008     | NIST-2709 | Ni                   | 0.0044                    | 0.0006      | 88                                      | 5                 | 2                 |
| 6/10/2008     | NIST-2586 | Ni                   | 0.0037                    | 0.0007      | 75                                      | 7.5               | 1                 |
| 6/10/2008     | MAG-1     | Ni                   | 0.0032                    | 0.0007      | 53                                      | 8                 | 2                 |
| 6/10/2008     | SDO-1     | Ni                   | 0.0048                    | 0.0008      | 99.5                                    | 9.9               | 2                 |
| 6/10/2008     | BCSS-1    | Cu                   | 0.0022                    | 0.0004      | 18.5                                    | 2.7               | 2                 |
| 6/10/2008     | MESS-1    | Cu                   | 0.0022                    | 0.0004      | 25.1                                    | 3.8               | 2                 |
| 6/10/2008     | NIST-2704 | Cu                   | 0.0096                    | 0.0005      | 98.6                                    | 5                 | 2                 |
| 6/10/2008     | NIST-2709 | Cu                   | 0.0022                    | 0.0004      | 34.6                                    | 0.7               | 2                 |
| 6/10/2008     | NIST-2709 | Cu                   | 0.0032                    | 0.0004      | 34.6                                    | 0.7               | 2                 |
| 6/10/2008     | NIST-2709 | Cu                   | 0.0029                    | 0.0004      | 34.6                                    | 0.7               | 2                 |
| 6/10/2008     | NIST-2586 | Cu                   | 0.0059                    | 0.0005      | 81                                      | 8.1               | 1                 |
| 6/10/2008     | MAG-1     | Cu                   | 0.0019                    | 0.0005      | 30                                      | 3                 | 2                 |
| 6/10/2008     | SDO-1     | Cu                   | 0.0035                    | 0.0005      | 60.2                                    | 9.6               | 2                 |
| 6/10/2008     | BCSS-1    | Zn                   | 0.0136                    | 0.0004      | 119                                     | 12                | 2                 |
| 6/10/2008     | MESS-1    | Zn                   | 0.0237                    | 0.0006      | 191                                     | 17                | 2                 |
| 6/10/2008     | NIST-2704 | Zn                   | 0.0573                    | 0.0010      | 438                                     | 12                | 2                 |
| 6/10/2008     | NIST-2709 | Zn                   | 0.0126                    | 0.0004      | 106                                     | 3                 | 2                 |
| 6/10/2008     | NIST-2709 | Zn                   | 0.0130                    | 0.0004      | 106                                     | 3                 | 2                 |
| 6/10/2008     | NIST-2709 | Zn                   | 0.0129                    | 0.0004      | 106                                     | 3                 | 2                 |
| 6/10/2008     | NIST-2586 | Zn                   | 0.0435                    | 0.0009      | 352                                     | 17.6              | 1                 |
| 6/10/2008     | MAG-1     | Zn                   | 0.0174                    | 0.0006      | 130                                     | 6                 | 2                 |
| 6/10/2008     | SDO-1     | Zn                   | 0.0069                    | 0.0004      | 64.1                                    | 6.9               | 2                 |
| 6/10/2008     | BCSS-1    | As                   | 0.0024                    | 0.0005      | 11.1                                    | 1.4               | 2                 |
| 6/10/2008     | MESS-1    | As                   | 0.0019                    | 0.0005      | 10.6                                    | 1.2               | 2                 |
| 6/10/2008     | NIST-2704 | As                   | 0.0040                    | 0.0011      | 23.4                                    | 0.8               | 2                 |
| 6/10/2008     | NIST-2709 | As                   | 0.0038                    | 0.0005      | 17.7                                    | 0.8               | 2                 |
| 6/10/2008     | NIST-2709 | As                   | 0.0048                    | 0.0005      | 17.7                                    | 0.8               | 2                 |
| 6/10/2008     | NIST-2709 | As                   | 0.0056                    | 0.0005      | 17.7                                    | 0.8               | 2                 |
| 6/10/2008     | SDO-1     | As                   | 0.0196                    | 0.0008      | 68.5                                    | 8.6               | 2                 |

| Analysis Date | SRM       | Element <sup>A</sup> | FP-XRF                    |             | Standard reference material information |                   |                   |
|---------------|-----------|----------------------|---------------------------|-------------|-----------------------------------------|-------------------|-------------------|
|               |           |                      | signal (cps) <sup>B</sup> | uncertainty | concentration (ppm)                     | uncertainty (ppm) | flag <sup>C</sup> |
| 6/10/2008     | NIST-2704 | Br                   | 0.0030                    | 0.0004      | 7                                       | 0.7               | 1                 |
| 6/10/2008     | NIST-2710 | Br                   | 0.0052                    | 0.0013      | 6                                       | 0.6               | 1                 |
| 6/10/2008     | MAG-1     | Br                   | 0.1068                    | 0.0013      | 250                                     | 25                | 1                 |
| 6/10/2008     | NIST-2704 | Rb                   | 0.0657                    | 0.0014      | 100                                     | 10                | 1                 |
| 6/10/2008     | NIST-2709 | Rb                   | 0.0572                    | 0.0014      | 96                                      | 9.6               | 1                 |
| 6/10/2008     | NIST-2709 | Rb                   | 0.0572                    | 0.0014      | 96                                      | 9.6               | 1                 |
| 6/10/2008     | NIST-2709 | Rb                   | 0.0579                    | 0.0014      | 96                                      | 9.6               | 1                 |
| 6/10/2008     | NIST-2710 | Rb                   | 0.0805                    | 0.0021      | 120                                     | 12                | 1                 |
| 6/10/2008     | MAG-1     | Rb                   | 0.0946                    | 0.0021      | 150                                     | 6                 | 2                 |
| 6/10/2008     | SDO-1     | Rb                   | 0.0777                    | 0.0014      | 126                                     | 3.9               | 2                 |
| 6/10/2008     | BCSS-1    | Sr                   | 0.0737                    | 0.0008      | 96                                      | 9.6               | 1                 |
| 6/10/2008     | MESS-1    | Sr                   | 0.0705                    | 0.0008      | 89                                      | 8.9               | 1                 |
| 6/10/2008     | NIST-2704 | Sr                   | 0.1027                    | 0.0016      | 130                                     | 13                | 1                 |
| 6/10/2008     | NIST-2709 | Sr                   | 0.1677                    | 0.0016      | 231                                     | 2                 | 2                 |
| 6/10/2008     | NIST-2709 | Sr                   | 0.1724                    | 0.0016      | 231                                     | 2                 | 2                 |
| 6/10/2008     | NIST-2709 | Sr                   | 0.1724                    | 0.0016      | 231                                     | 2                 | 2                 |
| 6/10/2008     | NIST-2710 | Sr                   | 0.2523                    | 0.0024      | 330                                     | 33                | 1                 |
| 6/10/2008     | NIST-2586 | Sr                   | 0.0611                    | 0.0008      | 84.1                                    | 8.41              | 1                 |
| 6/10/2008     | MAG-1     | Sr                   | 0.1058                    | 0.0016      | 150                                     | 15                | 2                 |
| 6/10/2008     | SDO-1     | Sr                   | 0.0572                    | 0.0008      | 75.1                                    | 11                | 2                 |
| 6/10/2008     | NIST-2704 | Zr                   | 0.3402                    | 0.0023      | 300                                     | 30                | 1                 |
| 6/10/2008     | NIST-2709 | Zr                   | 0.1496                    | 0.0023      | 160                                     | 16                | 1                 |
| 6/10/2008     | NIST-2709 | Zr                   | 0.1496                    | 0.0023      | 160                                     | 16                | 1                 |
| 6/10/2008     | NIST-2709 | Zr                   | 0.1543                    | 0.0023      | 160                                     | 16                | 1                 |
| 6/10/2008     | MAG-1     | Zr                   | 0.1274                    | 0.0023      | 130                                     | 13                | 2                 |
| 6/10/2008     | SDO-1     | Zr                   | 0.1613                    | 0.0023      | 165                                     | 24                | 2                 |
| 6/10/2008     | NIST-2704 | I-LEAP               | 0.0196                    | 0.0061      | 2                                       | 0.2               | 1                 |
| 6/10/2008     | NIST-2709 | I-LEAP               | 0.0167                    | 0.0049      | 5                                       | 0.5               | 1                 |
| 6/10/2008     | NIST-2709 | I-LEAP               | 0.0170                    | 0.0050      | 5                                       | 0.5               | 1                 |
| 6/10/2008     | MAG-1     | I-LEAP               | 0.0229                    | 0.0053      | 380                                     | 38                | 1                 |
| 6/10/2008     | NIST-2704 | Ba                   | 0.0728                    | 0.0050      | 414                                     | 12                | 2                 |
| 6/10/2008     | NIST-2709 | Ba                   | 0.0846                    | 0.0044      | 968                                     | 40                | 2                 |
| 6/10/2008     | NIST-2709 | Ba                   | 0.0804                    | 0.0044      | 968                                     | 40                | 2                 |
| 6/10/2008     | NIST-2709 | Ba                   | 0.0819                    | 0.0044      | 968                                     | 40                | 2                 |
| 6/10/2008     | NIST-2710 | Ba                   | 0.0774                    | 0.0050      | 707                                     | 51                | 2                 |

| Analysis Date | SRM       | Element <sup>A</sup> | FP-XRF                    |             | Standard reference material information |                   |                   |
|---------------|-----------|----------------------|---------------------------|-------------|-----------------------------------------|-------------------|-------------------|
|               |           |                      | signal (cps) <sup>B</sup> | uncertainty | concentration (ppm)                     | uncertainty (ppm) | flag <sup>C</sup> |
| 6/10/2008     | NIST-2586 | Ba                   | 0.0957                    | 0.0057      | 413                                     | 16.52             | 1                 |
| 6/10/2008     | MAG-1     | Ba                   | 0.0909                    | 0.0054      | 480                                     | 41                | 2                 |
| 6/10/2008     | SDO-1     | Ba                   | 0.0873                    | 0.0056      | 397                                     | 38                | 2                 |
| 6/10/2008     | NIST-2709 | Hg                   | 0.0009                    | 0.0003      | 1.4                                     | 0.08              | 2                 |
| 6/10/2008     | NIST-2709 | Hg                   | 0.0009                    | 0.0003      | 1.4                                     | 0.08              | 2                 |
| 6/10/2008     | NIST-2709 | Hg                   | 0.0013                    | 0.0003      | 1.4                                     | 0.08              | 2                 |
| 6/10/2008     | NIST-2710 | Hg                   | 0.0112                    | 0.0008      | 32.6                                    | 1.8               | 2                 |
| 6/10/2008     | MAG-1     | Hg                   | 0.0009                    | 0.0003      | 0.02                                    | 0.002             | 1                 |
| 6/10/2008     | SDO-1     | Hg                   | 0.0013                    | 0.0003      | 0.19                                    | 0.08              | 2                 |
| 6/10/2008     | BCSS-1    | Pb                   | 0.0045                    | 0.0004      | 22.7                                    | 3.4               | 2                 |
| 6/10/2008     | MESS-1    | Pb                   | 0.0065                    | 0.0004      | 34                                      | 6.1               | 2                 |
| 6/10/2008     | NIST-2704 | Pb                   | 0.0309                    | 0.0009      | 161                                     | 17                | 2                 |
| 6/10/2008     | NIST-2709 | Pb                   | 0.0035                    | 0.0004      | 18.9                                    | 0.5               | 2                 |
| 6/10/2008     | NIST-2709 | Pb                   | 0.0030                    | 0.0004      | 18.9                                    | 0.5               | 2                 |
| 6/10/2008     | NIST-2709 | Pb                   | 0.0024                    | 0.0004      | 18.9                                    | 0.5               | 2                 |
| 6/10/2008     | NIST-2586 | Pb                   | 0.0855                    | 0.0013      | 432                                     | 17.28             | 2                 |
| 6/10/2008     | MAG-1     | Pb                   | 0.0050                    | 0.0004      | 24                                      | 3                 | 2                 |
| 6/10/2008     | SDO-1     | Pb                   | 0.0047                    | 0.0004      | 27.9                                    | 5.2               | 2                 |
| 6/10/2008     | NIST-2704 | U                    | 0.0034                    | 0.0008      | 3.13                                    | 0.13              | 2                 |
| 6/10/2008     | NIST-2709 | U                    | 0.0029                    | 0.0008      | 3                                       | 0.3               | 1                 |
| 6/10/2008     | NIST-2709 | U                    | 0.0029                    | 0.0008      | 3                                       | 0.3               | 1                 |
| 6/10/2008     | NIST-2709 | U                    | 0.0032                    | 0.0008      | 3                                       | 0.3               | 1                 |
| 6/10/2008     | NIST-2710 | U                    | 0.0126                    | 0.0011      | 25                                      | 2.5               | 1                 |
| 6/10/2008     | MAG-1     | U                    | 0.0032                    | 0.0008      | 2.7                                     | 0.3               | 2                 |
| 6/10/2008     | SDO-1     | U                    | 0.0152                    | 0.0011      | 48.8                                    | 6.5               | 2                 |
| 6/11/2008     | BCSS-1    | S-LEAP               | 0.0054                    | 0.0016      | 3600                                    | 500               | 2                 |
| 6/11/2008     | MESS-1    | S-LEAP               | 0.0092                    | 0.0016      | 7200                                    | 500               | 2                 |
| 6/11/2008     | NIST-2710 | S-LEAP               | 0.0094                    | 0.0021      | 2400                                    | 60                | 2                 |
| 6/11/2008     | BCSS-1    | Cl-LEAP              | 0.0460                    | 0.0026      | 11200                                   | 500               | 2                 |
| 6/11/2008     | MESS-1    | Cl-LEAP              | 0.0415                    | 0.0025      | 8200                                    | 700               | 2                 |
| 6/11/2008     | MAG-1     | Cl-LEAP              | 0.0911                    | 0.0036      | 31000                                   | 600               | 2                 |
| 6/11/2008     | MAG-1     | Cl-LEAP              | 0.0984                    | 0.0036      | 31000                                   | 600               | 2                 |
| 6/11/2008     | BCSS-1    | K-LEAP               | 0.2981                    | 0.0049      | 18014                                   | 332               | 2                 |
| 6/11/2008     | MESS-1    | K-LEAP               | 0.2932                    | 0.0048      | 18595                                   | 332               | 2                 |
| 6/11/2008     | NIST-2704 | K-LEAP               | 0.3874                    | 0.0061      | 20000                                   | 400               | 2                 |

| Analysis Date | SRM       | Element <sup>A</sup> | FP-XRF                    |             | Standard reference material information |                   |                   |
|---------------|-----------|----------------------|---------------------------|-------------|-----------------------------------------|-------------------|-------------------|
|               |           |                      | signal (cps) <sup>B</sup> | uncertainty | concentration (ppm)                     | uncertainty (ppm) | flag <sup>C</sup> |
| 6/11/2008     | NIST-2704 | K-LEAP               | 0.3873                    | 0.0060      | 20000                                   | 400               | 2                 |
| 6/11/2008     | NIST-2709 | K-LEAP               | 0.3139                    | 0.0052      | 20300                                   | 600               | 2                 |
| 6/11/2008     | NIST-2709 | K-LEAP               | 0.3215                    | 0.0053      | 20300                                   | 600               | 2                 |
| 6/11/2008     | NIST-2710 | K-LEAP               | 0.3892                    | 0.0064      | 21100                                   | 1100              | 2                 |
| 6/11/2008     | NIST-2711 | K-LEAP               | 0.3982                    | 0.0058      | 24500                                   | 800               | 2                 |
| 6/11/2008     | NIST-2711 | K-LEAP               | 0.3970                    | 0.0058      | 24500                                   | 800               | 2                 |
| 6/11/2008     | NIST-2586 | K-LEAP               | 0.1836                    | 0.0044      | 9760                                    | 195.2             | 1                 |
| 6/11/2008     | MAG-1     | K-LEAP               | 0.5217                    | 0.0074      | 29470                                   | 1411              | 2                 |
| 6/11/2008     | MAG-1     | K-LEAP               | 0.5323                    | 0.0075      | 29470                                   | 1411              | 2                 |
| 6/11/2008     | SCO-1     | K-LEAP               | 0.3679                    | 0.0057      | 22995                                   | 664               | 2                 |
| 6/11/2008     | SCO-1     | K-LEAP               | 0.3616                    | 0.0056      | 22995                                   | 664               | 2                 |
| 6/11/2008     | BCSS-1    | Ca-LEAP              | 0.2005                    | 0.0046      | 5432                                    | 529               | 2                 |
| 6/11/2008     | MESS-1    | Ca-LEAP              | 0.1507                    | 0.0041      | 4817                                    | 457               | 2                 |
| 6/11/2008     | NIST-2704 | Ca-LEAP              | 1.0114                    | 0.0118      | 26000                                   | 300               | 2                 |
| 6/11/2008     | NIST-2704 | Ca-LEAP              | 1.0055                    | 0.0116      | 26000                                   | 300               | 2                 |
| 6/11/2008     | NIST-2709 | Ca-LEAP              | 0.6707                    | 0.0086      | 18900                                   | 500               | 2                 |
| 6/11/2008     | NIST-2709 | Ca-LEAP              | 0.6616                    | 0.0085      | 18900                                   | 500               | 2                 |
| 6/11/2008     | NIST-2710 | Ca-LEAP              | 0.4318                    | 0.0074      | 12500                                   | 300               | 2                 |
| 6/11/2008     | NIST-2711 | Ca-LEAP              | 1.0183                    | 0.0112      | 28800                                   | 800               | 2                 |
| 6/11/2008     | NIST-2711 | Ca-LEAP              | 1.0155                    | 0.0112      | 28800                                   | 800               | 2                 |
| 6/11/2008     | NIST-2586 | Ca-LEAP              | 0.7767                    | 0.0100      | 22180                                   | 443.6             | 1                 |
| 6/11/2008     | MAG-1     | Ca-LEAP              | 0.3382                    | 0.0065      | 9791                                    | 715               | 2                 |
| 6/11/2008     | MAG-1     | Ca-LEAP              | 0.3519                    | 0.0067      | 9791                                    | 715               | 2                 |
| 6/11/2008     | SCO-1     | Ca-LEAP              | 0.6949                    | 0.0088      | 18725                                   | 1429              | 2                 |
| 6/11/2008     | SCO-1     | Ca-LEAP              | 0.6860                    | 0.0087      | 18725                                   | 1429              | 2                 |
| 6/11/2008     | BCSS-1    | Ti-LEAP              | 0.3915                    | 0.0088      | 4400                                    | 144               | 2                 |
| 6/11/2008     | MESS-1    | Ti-LEAP              | 0.4446                    | 0.0092      | 5425                                    | 168               | 2                 |
| 6/11/2008     | NIST-2704 | Ti-LEAP              | 0.4330                    | 0.0101      | 4570                                    | 180               | 2                 |
| 6/11/2008     | NIST-2704 | Ti-LEAP              | 0.4425                    | 0.0101      | 4570                                    | 180               | 2                 |
| 6/11/2008     | NIST-2709 | Ti-LEAP              | 0.3015                    | 0.0086      | 3420                                    | 240               | 2                 |
| 6/11/2008     | NIST-2709 | Ti-LEAP              | 0.2979                    | 0.0086      | 3420                                    | 240               | 2                 |
| 6/11/2008     | NIST-2710 | Ti-LEAP              | 0.2786                    | 0.0094      | 2830                                    | 100               | 2                 |
| 6/11/2008     | NIST-2711 | Ti-LEAP              | 0.2424                    | 0.0076      | 3060                                    | 230               | 2                 |
| 6/11/2008     | NIST-2711 | Ti-LEAP              | 0.2468                    | 0.0077      | 3060                                    | 230               | 2                 |
| 6/11/2008     | NIST-2586 | Ti-LEAP              | 0.6132                    | 0.0122      | 6050                                    | 665.5             | 1                 |

| Analysis Date | SRM       | Element <sup>A</sup> | FP-XRF                    |             | Standard reference material information |                   |                   |
|---------------|-----------|----------------------|---------------------------|-------------|-----------------------------------------|-------------------|-------------------|
|               |           |                      | signal (cps) <sup>B</sup> | uncertainty | concentration (ppm)                     | uncertainty (ppm) | flag <sup>C</sup> |
| 6/11/2008     | MAG-1     | Ti-LEAP              | 0.3988                    | 0.0104      | 4496                                    | 420               | 2                 |
| 6/11/2008     | MAG-1     | Ti-LEAP              | 0.4040                    | 0.0104      | 4496                                    | 420               | 2                 |
| 6/11/2008     | SCO-1     | Ti-LEAP              | 0.3015                    | 0.0084      | 3776                                    | 360               | 2                 |
| 6/11/2008     | SCO-1     | Ti-LEAP              | 0.2936                    | 0.0084      | 3776                                    | 360               | 2                 |
| 6/11/2008     | BCSS-1    | Ti                   | 0.0204                    | 0.0007      | 4400                                    | 144               | 2                 |
| 6/11/2008     | MESS-1    | Ti                   | 0.0240                    | 0.0007      | 5425                                    | 168               | 2                 |
| 6/11/2008     | NIST-2704 | Ti                   | 0.0239                    | 0.0008      | 4570                                    | 180               | 2                 |
| 6/11/2008     | NIST-2704 | Ti                   | 0.0241                    | 0.0008      | 4570                                    | 180               | 2                 |
| 6/11/2008     | NIST-2709 | Ti                   | 0.0168                    | 0.0006      | 3420                                    | 240               | 2                 |
| 6/11/2008     | NIST-2709 | Ti                   | 0.0169                    | 0.0006      | 3420                                    | 240               | 2                 |
| 6/11/2008     | NIST-2711 | Ti                   | 0.0155                    | 0.0006      | 3060                                    | 230               | 2                 |
| 6/11/2008     | NIST-2711 | Ti                   | 0.0153                    | 0.0006      | 3060                                    | 230               | 2                 |
| 6/11/2008     | NIST-2586 | Ti                   | 0.0339                    | 0.0009      | 6050                                    | 665.5             | 1                 |
| 6/11/2008     | MAG-1     | Ti                   | 0.0243                    | 0.0008      | 4496                                    | 420               | 2                 |
| 6/11/2008     | MAG-1     | Ti                   | 0.0234                    | 0.0008      | 4496                                    | 420               | 2                 |
| 6/11/2008     | SCO-1     | Ti                   | 0.0161                    | 0.0006      | 3776                                    | 360               | 2                 |
| 6/11/2008     | SCO-1     | Ti                   | 0.0167                    | 0.0006      | 3776                                    | 360               | 2                 |
| 6/11/2008     | BCSS-1    | V                    | 0.0017                    | 0.0004      | 93.4                                    | 4.9               | 2                 |
| 6/11/2008     | MESS-1    | V                    | 0.0023                    | 0.0004      | 72.4                                    | 17                | 2                 |
| 6/11/2008     | NIST-2704 | V                    | 0.0018                    | 0.0004      | 95                                      | 4                 | 2                 |
| 6/11/2008     | NIST-2704 | V                    | 0.0021                    | 0.0004      | 95                                      | 4                 | 2                 |
| 6/11/2008     | NIST-2709 | V                    | 0.0024                    | 0.0004      | 112                                     | 5                 | 2                 |
| 6/11/2008     | NIST-2709 | V                    | 0.0027                    | 0.0004      | 112                                     | 5                 | 2                 |
| 6/11/2008     | NIST-2710 | V                    | 0.0025                    | 0.0005      | 76.6                                    | 2.3               | 2                 |
| 6/11/2008     | NIST-2711 | V                    | 0.0027                    | 0.0004      | 81.6                                    | 2.9               | 2                 |
| 6/11/2008     | NIST-2711 | V                    | 0.0021                    | 0.0004      | 81.6                                    | 2.9               | 2                 |
| 6/11/2008     | NIST-2586 | V                    | 0.0031                    | 0.0005      | 160                                     | 16                | 1                 |
| 6/11/2008     | MAG-1     | V                    | 0.0022                    | 0.0005      | 140                                     | 6                 | 2                 |
| 6/11/2008     | MAG-1     | V                    | 0.0028                    | 0.0005      | 140                                     | 6                 | 2                 |
| 6/11/2008     | SCO-1     | V                    | 0.0029                    | 0.0004      | 130                                     | 13                | 2                 |
| 6/11/2008     | SCO-1     | V                    | 0.0024                    | 0.0004      | 130                                     | 13                | 2                 |
| 6/11/2008     | BCSS-1    | Cr-LEAP              | 0.0429                    | 0.0028      | 123                                     | 14                | 2                 |
| 6/11/2008     | MESS-1    | Cr-LEAP              | 0.0199                    | 0.0025      | 71                                      | 11                | 2                 |
| 6/11/2008     | NIST-2704 | Cr-LEAP              | 0.0454                    | 0.0035      | 135                                     | 5                 | 2                 |
| 6/11/2008     | NIST-2704 | Cr-LEAP              | 0.0442                    | 0.0032      | 135                                     | 5                 | 2                 |



| Analysis Date | SRM       | Element <sup>A</sup> | FP-XRF                    |             | Standard reference material information |                   |                   |
|---------------|-----------|----------------------|---------------------------|-------------|-----------------------------------------|-------------------|-------------------|
|               |           |                      | signal (cps) <sup>B</sup> | uncertainty | concentration (ppm)                     | uncertainty (ppm) | flag <sup>C</sup> |
| 6/11/2008     | NIST-2709 | Cr-LEAP              | 0.0391                    | 0.0032      | 130                                     | 4                 | 2                 |
| 6/11/2008     | NIST-2709 | Cr-LEAP              | 0.0353                    | 0.0032      | 130                                     | 4                 | 2                 |
| 6/11/2008     | NIST-2711 | Cr-LEAP              | 0.0199                    | 0.0025      | 47                                      | 4.7               | 1                 |
| 6/11/2008     | NIST-2711 | Cr-LEAP              | 0.0155                    | 0.0025      | 47                                      | 4.7               | 1                 |
| 6/11/2008     | NIST-2586 | Cr-LEAP              | 0.0905                    | 0.0041      | 301                                     | 45.15             | 2                 |
| 6/11/2008     | MAG-1     | Cr-LEAP              | 0.0347                    | 0.0035      | 97                                      | 8                 | 2                 |
| 6/11/2008     | MAG-1     | Cr-LEAP              | 0.0379                    | 0.0035      | 97                                      | 8                 | 2                 |
| 6/11/2008     | SCO-1     | Cr-LEAP              | 0.0224                    | 0.0028      | 68                                      | 5                 | 2                 |
| 6/11/2008     | SCO-1     | Cr-LEAP              | 0.0227                    | 0.0028      | 68                                      | 5                 | 2                 |
| 6/11/2008     | BCSS-1    | Cr                   | 0.0017                    | 0.0004      | 123                                     | 14                | 2                 |
| 6/11/2008     | MESS-1    | Cr                   | 0.0016                    | 0.0004      | 71                                      | 11                | 2                 |
| 6/11/2008     | NIST-2704 | Cr                   | 0.0027                    | 0.0005      | 135                                     | 5                 | 2                 |
| 6/11/2008     | NIST-2704 | Cr                   | 0.0022                    | 0.0004      | 135                                     | 5                 | 2                 |
| 6/11/2008     | NIST-2709 | Cr                   | 0.0016                    | 0.0004      | 130                                     | 4                 | 2                 |
| 6/11/2008     | NIST-2709 | Cr                   | 0.0024                    | 0.0004      | 130                                     | 4                 | 2                 |
| 6/11/2008     | NIST-2711 | Cr                   | 0.0012                    | 0.0004      | 47                                      | 4.7               | 1                 |
| 6/11/2008     | NIST-2586 | Cr                   | 0.0051                    | 0.0005      | 301                                     | 45.15             | 2                 |
| 6/11/2008     | MAG-1     | Cr                   | 0.0028                    | 0.0005      | 97                                      | 8                 | 2                 |
| 6/11/2008     | SCO-1     | Cr                   | 0.0016                    | 0.0004      | 68                                      | 5                 | 2                 |
| 6/11/2008     | SCO-1     | Cr                   | 0.0015                    | 0.0004      | 68                                      | 5                 | 2                 |
| 6/11/2008     | BCSS-1    | Mn-LEAP              | 0.0627                    | 0.0042      | 229                                     | 15                | 2                 |
| 6/11/2008     | MESS-1    | Mn-LEAP              | 0.1538                    | 0.0046      | 513                                     | 25                | 2                 |
| 6/11/2008     | NIST-2704 | Mn-LEAP              | 0.2065                    | 0.0059      | 555                                     | 19                | 2                 |
| 6/11/2008     | NIST-2704 | Mn-LEAP              | 0.1969                    | 0.0059      | 555                                     | 19                | 2                 |
| 6/11/2008     | NIST-2709 | Mn-LEAP              | 0.1872                    | 0.0054      | 538                                     | 17                | 2                 |
| 6/11/2008     | NIST-2709 | Mn-LEAP              | 0.1918                    | 0.0054      | 538                                     | 17                | 2                 |
| 6/11/2008     | NIST-2711 | Mn-LEAP              | 0.2199                    | 0.0050      | 638                                     | 28                | 2                 |
| 6/11/2008     | NIST-2711 | Mn-LEAP              | 0.2153                    | 0.0050      | 638                                     | 28                | 2                 |
| 6/11/2008     | NIST-2586 | Mn-LEAP              | 0.3686                    | 0.0075      | 1000                                    | 20                | 1                 |
| 6/11/2008     | MAG-1     | Mn-LEAP              | 0.2809                    | 0.0067      | 759                                     | 70                | 2                 |
| 6/11/2008     | MAG-1     | Mn-LEAP              | 0.2763                    | 0.0067      | 759                                     | 70                | 2                 |
| 6/11/2008     | SCO-1     | Mn-LEAP              | 0.1254                    | 0.0046      | 410                                     | 30                | 2                 |
| 6/11/2008     | SCO-1     | Mn-LEAP              | 0.1241                    | 0.0046      | 410                                     | 30                | 2                 |
| 6/11/2008     | BCSS-1    | Mn                   | 0.0052                    | 0.0005      | 229                                     | 15                | 2                 |
| 6/11/2008     | MESS-1    | Mn                   | 0.0091                    | 0.0006      | 513                                     | 25                | 2                 |

| Analysis Date | SRM       | Element <sup>A</sup> | FP-XRF                    |             | Standard reference material information |                   |                   |
|---------------|-----------|----------------------|---------------------------|-------------|-----------------------------------------|-------------------|-------------------|
|               |           |                      | signal (cps) <sup>B</sup> | uncertainty | concentration (ppm)                     | uncertainty (ppm) | flag <sup>C</sup> |
| 6/11/2008     | NIST-2704 | Mn                   | 0.0126                    | 0.0007      | 555                                     | 19                | 2                 |
| 6/11/2008     | NIST-2704 | Mn                   | 0.0124                    | 0.0007      | 555                                     | 19                | 2                 |
| 6/11/2008     | NIST-2709 | Mn                   | 0.0109                    | 0.0006      | 538                                     | 17                | 2                 |
| 6/11/2008     | NIST-2709 | Mn                   | 0.0110                    | 0.0006      | 538                                     | 17                | 2                 |
| 6/11/2008     | NIST-2711 | Mn                   | 0.0136                    | 0.0006      | 638                                     | 28                | 2                 |
| 6/11/2008     | NIST-2711 | Mn                   | 0.0122                    | 0.0006      | 638                                     | 28                | 2                 |
| 6/11/2008     | NIST-2586 | Mn                   | 0.0206                    | 0.0009      | 1000                                    | 20                | 1                 |
| 6/11/2008     | MAG-1     | Mn                   | 0.0161                    | 0.0008      | 759                                     | 70                | 2                 |
| 6/11/2008     | MAG-1     | Mn                   | 0.0170                    | 0.0008      | 759                                     | 70                | 2                 |
| 6/11/2008     | SCO-1     | Mn                   | 0.0080                    | 0.0006      | 410                                     | 30                | 2                 |
| 6/11/2008     | SCO-1     | Mn                   | 0.0071                    | 0.0006      | 410                                     | 30                | 2                 |
| 6/11/2008     | BCSS-1    | Fe-LEAP              | 17.3510                   | 0.1347      | 32873                                   | 979               | 2                 |
| 6/11/2008     | MESS-1    | Fe-LEAP              | 15.5660                   | 0.1200      | 30495                                   | 1749              | 2                 |
| 6/11/2008     | NIST-2704 | Fe-LEAP              | 21.9193                   | 0.1787      | 41100                                   | 1000              | 2                 |
| 6/11/2008     | NIST-2704 | Fe-LEAP              | 21.7064                   | 0.1754      | 41100                                   | 1000              | 2                 |
| 6/11/2008     | NIST-2709 | Fe-LEAP              | 18.6006                   | 0.1461      | 35000                                   | 1100              | 2                 |
| 6/11/2008     | NIST-2709 | Fe-LEAP              | 18.7467                   | 0.1477      | 35000                                   | 1100              | 2                 |
| 6/11/2008     | NIST-2711 | Fe-LEAP              | 14.1904                   | 0.1108      | 28900                                   | 600               | 2                 |
| 6/11/2008     | NIST-2711 | Fe-LEAP              | 14.1301                   | 0.1108      | 28900                                   | 600               | 2                 |
| 6/11/2008     | NIST-2586 | Fe-LEAP              | 27.7817                   | 0.2303      | 51610                                   | 1032.2            | 1                 |
| 6/11/2008     | MAG-1     | Fe-LEAP              | 26.4773                   | 0.2205      | 47561                                   | 4197              | 2                 |
| 6/11/2008     | MAG-1     | Fe-LEAP              | 26.5175                   | 0.2205      | 47561                                   | 4197              | 2                 |
| 6/11/2008     | SCO-1     | Fe-LEAP              | 18.2856                   | 0.1445      | 35881                                   | 1259              | 2                 |
| 6/11/2008     | SCO-1     | Fe-LEAP              | 18.1792                   | 0.1428      | 35881                                   | 1259              | 2                 |
| 6/11/2008     | BCSS-1    | Fe                   | 1.0910                    | 0.0056      | 32873                                   | 979               | 2                 |
| 6/11/2008     | MESS-1    | Fe                   | 1.0122                    | 0.0053      | 30495                                   | 1749              | 2                 |
| 6/11/2008     | NIST-2704 | Fe                   | 1.4488                    | 0.0074      | 41100                                   | 1000              | 2                 |
| 6/11/2008     | NIST-2704 | Fe                   | 1.4492                    | 0.0074      | 41100                                   | 1000              | 2                 |
| 6/11/2008     | NIST-2709 | Fe                   | 1.1390                    | 0.0058      | 35000                                   | 1100              | 2                 |
| 6/11/2008     | NIST-2709 | Fe                   | 1.1490                    | 0.0059      | 35000                                   | 1100              | 2                 |
| 6/11/2008     | NIST-2711 | Fe                   | 0.9236                    | 0.0051      | 28900                                   | 600               | 2                 |
| 6/11/2008     | NIST-2711 | Fe                   | 0.9343                    | 0.0051      | 28900                                   | 600               | 2                 |
| 6/11/2008     | NIST-2586 | Fe                   | 1.8563                    | 0.0092      | 51610                                   | 1032.2            | 1                 |
| 6/11/2008     | MAG-1     | Fe                   | 1.7210                    | 0.0087      | 47561                                   | 4197              | 2                 |
| 6/11/2008     | MAG-1     | Fe                   | 1.7228                    | 0.0087      | 47561                                   | 4197              | 2                 |

| Analysis Date | SRM       | Element <sup>A</sup> | FP-XRF                    |             | Standard reference material information |                   |                   |
|---------------|-----------|----------------------|---------------------------|-------------|-----------------------------------------|-------------------|-------------------|
|               |           |                      | signal (cps) <sup>B</sup> | uncertainty | concentration (ppm)                     | uncertainty (ppm) | flag <sup>C</sup> |
| 6/11/2008     | SCO-1     | Fe                   | 1.1366                    | 0.0059      | 35881                                   | 1259              | 2                 |
| 6/11/2008     | SCO-1     | Fe                   | 1.1412                    | 0.0059      | 35881                                   | 1259              | 2                 |
| 6/11/2008     | BCSS-1    | Co                   | 0.0143                    | 0.0017      | 11.4                                    | 2.1               | 2                 |
| 6/11/2008     | MESS-1    | Co                   | 0.0113                    | 0.0016      | 10.8                                    | 1.9               | 2                 |
| 6/11/2008     | NIST-2704 | Co                   | 0.0193                    | 0.0020      | 14                                      | 0.6               | 2                 |
| 6/11/2008     | NIST-2704 | Co                   | 0.0171                    | 0.0020      | 14                                      | 0.6               | 2                 |
| 6/11/2008     | NIST-2709 | Co                   | 0.0150                    | 0.0017      | 13.4                                    | 0.7               | 2                 |
| 6/11/2008     | NIST-2709 | Co                   | 0.0150                    | 0.0017      | 13.4                                    | 0.7               | 2                 |
| 6/11/2008     | NIST-2711 | Co                   | 0.0149                    | 0.0016      | 10                                      | 1                 | 1                 |
| 6/11/2008     | NIST-2711 | Co                   | 0.0126                    | 0.0016      | 10                                      | 1                 | 1                 |
| 6/11/2008     | NIST-2586 | Co                   | 0.0233                    | 0.0023      | 35                                      | 3.5               | 1                 |
| 6/11/2008     | MAG-1     | Co                   | 0.0273                    | 0.0022      | 20                                      | 1.6               | 2                 |
| 6/11/2008     | MAG-1     | Co                   | 0.0211                    | 0.0022      | 20                                      | 1.6               | 2                 |
| 6/11/2008     | SCO-1     | Co                   | 0.0188                    | 0.0017      | 11                                      | 0.8               | 2                 |
| 6/11/2008     | SCO-1     | Co                   | 0.0166                    | 0.0017      | 11                                      | 0.8               | 2                 |
| 6/11/2008     | BCSS-1    | Ni                   | 0.0035                    | 0.0006      | 55.3                                    | 3.6               | 2                 |
| 6/11/2008     | NIST-2704 | Ni                   | 0.0023                    | 0.0006      | 44.1                                    | 3                 | 2                 |
| 6/11/2008     | NIST-2704 | Ni                   | 0.0032                    | 0.0006      | 44.1                                    | 3                 | 2                 |
| 6/11/2008     | NIST-2709 | Ni                   | 0.0049                    | 0.0006      | 88                                      | 5                 | 2                 |
| 6/11/2008     | NIST-2709 | Ni                   | 0.0046                    | 0.0006      | 88                                      | 5                 | 2                 |
| 6/11/2008     | NIST-2711 | Ni                   | 0.0017                    | 0.0006      | 20.6                                    | 1.1               | 2                 |
| 6/11/2008     | NIST-2711 | Ni                   | 0.0018                    | 0.0006      | 20.6                                    | 1.1               | 2                 |
| 6/11/2008     | NIST-2586 | Ni                   | 0.0042                    | 0.0007      | 75                                      | 7.5               | 1                 |
| 6/11/2008     | MAG-1     | Ni                   | 0.0026                    | 0.0006      | 53                                      | 8                 | 2                 |
| 6/11/2008     | SCO-1     | Ni                   | 0.0023                    | 0.0006      | 27                                      | 4                 | 2                 |
| 6/11/2008     | MESS-1    | Cu                   | 0.0018                    | 0.0004      | 25.1                                    | 3.8               | 2                 |
| 6/11/2008     | NIST-2704 | Cu                   | 0.0097                    | 0.0005      | 98.6                                    | 5                 | 2                 |
| 6/11/2008     | NIST-2704 | Cu                   | 0.0085                    | 0.0005      | 98.6                                    | 5                 | 2                 |
| 6/11/2008     | NIST-2709 | Cu                   | 0.0032                    | 0.0004      | 34.6                                    | 0.7               | 2                 |
| 6/11/2008     | NIST-2709 | Cu                   | 0.0027                    | 0.0004      | 34.6                                    | 0.7               | 2                 |
| 6/11/2008     | NIST-2711 | Cu                   | 0.0100                    | 0.0005      | 114                                     | 2                 | 2                 |
| 6/11/2008     | NIST-2711 | Cu                   | 0.0109                    | 0.0005      | 114                                     | 2                 | 2                 |
| 6/11/2008     | NIST-2586 | Cu                   | 0.0069                    | 0.0005      | 81                                      | 8.1               | 1                 |
| 6/11/2008     | MAG-1     | Cu                   | 0.0021                    | 0.0005      | 30                                      | 3                 | 2                 |
| 6/11/2008     | MAG-1     | Cu                   | 0.0026                    | 0.0005      | 30                                      | 3                 | 2                 |

| Analysis Date | SRM       | Element <sup>A</sup> | FP-XRF                    |             | Standard reference material information |                   |                   |
|---------------|-----------|----------------------|---------------------------|-------------|-----------------------------------------|-------------------|-------------------|
|               |           |                      | signal (cps) <sup>B</sup> | uncertainty | concentration (ppm)                     | uncertainty (ppm) | flag <sup>C</sup> |
| 6/11/2008     | SCO-1     | Cu                   | 0.0015                    | 0.0004      | 29                                      | 2                 | 2                 |
| 6/11/2008     | SCO-1     | Cu                   | 0.0021                    | 0.0004      | 29                                      | 2                 | 2                 |
| 6/11/2008     | BCSS-1    | Zn                   | 0.0135                    | 0.0004      | 119                                     | 12                | 2                 |
| 6/11/2008     | MESS-1    | Zn                   | 0.0228                    | 0.0006      | 191                                     | 17                | 2                 |
| 6/11/2008     | NIST-2704 | Zn                   | 0.0592                    | 0.0010      | 438                                     | 12                | 2                 |
| 6/11/2008     | NIST-2704 | Zn                   | 0.0564                    | 0.0010      | 438                                     | 12                | 2                 |
| 6/11/2008     | NIST-2709 | Zn                   | 0.0138                    | 0.0004      | 106                                     | 3                 | 2                 |
| 6/11/2008     | NIST-2709 | Zn                   | 0.0127                    | 0.0004      | 106                                     | 3                 | 2                 |
| 6/11/2008     | NIST-2711 | Zn                   | 0.0450                    | 0.0009      | 350.4                                   | 4.8               | 2                 |
| 6/11/2008     | NIST-2711 | Zn                   | 0.0451                    | 0.0009      | 350.4                                   | 4.8               | 2                 |
| 6/11/2008     | NIST-2586 | Zn                   | 0.0438                    | 0.0009      | 352                                     | 17.6              | 1                 |
| 6/11/2008     | MAG-1     | Zn                   | 0.0172                    | 0.0006      | 130                                     | 6                 | 2                 |
| 6/11/2008     | MAG-1     | Zn                   | 0.0177                    | 0.0006      | 130                                     | 6                 | 2                 |
| 6/11/2008     | SCO-1     | Zn                   | 0.0115                    | 0.0004      | 100                                     | 8                 | 2                 |
| 6/11/2008     | SCO-1     | Zn                   | 0.0135                    | 0.0004      | 100                                     | 8                 | 2                 |
| 6/11/2008     | BCSS-1    | As                   | 0.0027                    | 0.0005      | 11.1                                    | 1.4               | 2                 |
| 6/11/2008     | MESS-1    | As                   | 0.0027                    | 0.0005      | 10.6                                    | 1.2               | 2                 |
| 6/11/2008     | NIST-2704 | As                   | 0.0048                    | 0.0011      | 23.4                                    | 0.8               | 2                 |
| 6/11/2008     | NIST-2704 | As                   | 0.0040                    | 0.0011      | 23.4                                    | 0.8               | 2                 |
| 6/11/2008     | NIST-2709 | As                   | 0.0056                    | 0.0005      | 17.7                                    | 0.8               | 2                 |
| 6/11/2008     | NIST-2709 | As                   | 0.0043                    | 0.0005      | 17.7                                    | 0.8               | 2                 |
| 6/11/2008     | NIST-2710 | As                   | 0.1399                    | 0.0059      | 626                                     | 38                | 2                 |
| 6/11/2008     | NIST-2711 | As                   | 0.0097                    | 0.0024      | 105                                     | 8                 | 2                 |
| 6/11/2008     | NIST-2711 | As                   | 0.0123                    | 0.0024      | 105                                     | 8                 | 2                 |
| 6/11/2008     | MAG-1     | As                   | 0.0027                    | 0.0005      | 9.2                                     | 0.92              | 1                 |
| 6/11/2008     | MAG-1     | As                   | 0.0029                    | 0.0005      | 9.2                                     | 0.92              | 1                 |
| 6/11/2008     | SCO-1     | As                   | 0.0029                    | 0.0005      | 12                                      | 1                 | 2                 |
| 6/11/2008     | SCO-1     | As                   | 0.0024                    | 0.0005      | 12                                      | 1                 | 2                 |
| 6/11/2008     | NIST-2704 | Br                   | 0.0030                    | 0.0004      | 7                                       | 0.7               | 1                 |
| 6/11/2008     | NIST-2704 | Br                   | 0.0022                    | 0.0004      | 7                                       | 0.7               | 1                 |
| 6/11/2008     | NIST-2710 | Br                   | 0.0043                    | 0.0013      | 6                                       | 0.6               | 1                 |
| 6/11/2008     | NIST-2711 | Br                   | 0.0048                    | 0.0004      | 5                                       | 0.5               | 1                 |
| 6/11/2008     | NIST-2711 | Br                   | 0.0043                    | 0.0004      | 5                                       | 0.5               | 1                 |
| 6/11/2008     | MAG-1     | Br                   | 0.1063                    | 0.0013      | 250                                     | 25                | 1                 |
| 6/11/2008     | MAG-1     | Br                   | 0.1055                    | 0.0013      | 250                                     | 25                | 1                 |

| Analysis Date | SRM       | Element <sup>A</sup> | FP-XRF                    |             | Standard reference material information |                   |                   |
|---------------|-----------|----------------------|---------------------------|-------------|-----------------------------------------|-------------------|-------------------|
|               |           |                      | signal (cps) <sup>B</sup> | uncertainty | concentration (ppm)                     | uncertainty (ppm) | flag <sup>C</sup> |
| 6/11/2008     | NIST-2704 | Rb                   | 0.0635                    | 0.0014      | 100                                     | 10                | 1                 |
| 6/11/2008     | NIST-2704 | Rb                   | 0.0628                    | 0.0014      | 100                                     | 10                | 1                 |
| 6/11/2008     | NIST-2709 | Rb                   | 0.0586                    | 0.0014      | 96                                      | 9.6               | 1                 |
| 6/11/2008     | NIST-2709 | Rb                   | 0.0586                    | 0.0014      | 96                                      | 9.6               | 1                 |
| 6/11/2008     | NIST-2710 | Rb                   | 0.0791                    | 0.0021      | 120                                     | 12                | 1                 |
| 6/11/2008     | NIST-2711 | Rb                   | 0.0720                    | 0.0014      | 110                                     | 11                | 1                 |
| 6/11/2008     | NIST-2711 | Rb                   | 0.0706                    | 0.0014      | 110                                     | 11                | 1                 |
| 6/11/2008     | MAG-1     | Rb                   | 0.0932                    | 0.0014      | 150                                     | 6                 | 2                 |
| 6/11/2008     | MAG-1     | Rb                   | 0.0967                    | 0.0021      | 150                                     | 6                 | 2                 |
| 6/11/2008     | SCO-1     | Rb                   | 0.0671                    | 0.0014      | 110                                     | 4                 | 2                 |
| 6/11/2008     | SCO-1     | Rb                   | 0.0692                    | 0.0014      | 110                                     | 4                 | 2                 |
| 6/11/2008     | BCSS-1    | Sr                   | 0.0737                    | 0.0008      | 96                                      | 9.6               | 1                 |
| 6/11/2008     | MESS-1    | Sr                   | 0.0682                    | 0.0008      | 89                                      | 8.9               | 1                 |
| 6/11/2008     | NIST-2704 | Sr                   | 0.0995                    | 0.0016      | 130                                     | 13                | 1                 |
| 6/11/2008     | NIST-2704 | Sr                   | 0.1027                    | 0.0016      | 130                                     | 13                | 1                 |
| 6/11/2008     | NIST-2709 | Sr                   | 0.1661                    | 0.0016      | 231                                     | 2                 | 2                 |
| 6/11/2008     | NIST-2709 | Sr                   | 0.1685                    | 0.0016      | 231                                     | 2                 | 2                 |
| 6/11/2008     | NIST-2710 | Sr                   | 0.2547                    | 0.0024      | 330                                     | 33                | 1                 |
| 6/11/2008     | NIST-2711 | Sr                   | 0.1834                    | 0.0016      | 245.3                                   | 0.7               | 2                 |
| 6/11/2008     | NIST-2711 | Sr                   | 0.1826                    | 0.0016      | 245.3                                   | 0.7               | 2                 |
| 6/11/2008     | NIST-2586 | Sr                   | 0.0611                    | 0.0008      | 84.1                                    | 8.41              | 1                 |
| 6/11/2008     | MAG-1     | Sr                   | 0.1058                    | 0.0016      | 150                                     | 15                | 2                 |
| 6/11/2008     | MAG-1     | Sr                   | 0.1050                    | 0.0016      | 150                                     | 15                | 2                 |
| 6/11/2008     | SCO-1     | Sr                   | 0.1222                    | 0.0016      | 170                                     | 16                | 2                 |
| 6/11/2008     | SCO-1     | Sr                   | 0.1254                    | 0.0016      | 170                                     | 16                | 2                 |
| 6/11/2008     | NIST-2704 | Zr                   | 0.3425                    | 0.0023      | 300                                     | 30                | 1                 |
| 6/11/2008     | NIST-2704 | Zr                   | 0.3133                    | 0.0023      | 300                                     | 30                | 1                 |
| 6/11/2008     | NIST-2709 | Zr                   | 0.1555                    | 0.0023      | 160                                     | 16                | 1                 |
| 6/11/2008     | NIST-2709 | Zr                   | 0.1496                    | 0.0023      | 160                                     | 16                | 1                 |
| 6/11/2008     | NIST-2711 | Zr                   | 0.2724                    | 0.0023      | 230                                     | 23                | 1                 |
| 6/11/2008     | NIST-2711 | Zr                   | 0.2724                    | 0.0023      | 230                                     | 23                | 1                 |
| 6/11/2008     | MAG-1     | Zr                   | 0.1297                    | 0.0023      | 130                                     | 13                | 2                 |
| 6/11/2008     | MAG-1     | Zr                   | 0.1297                    | 0.0023      | 130                                     | 13                | 2                 |
| 6/11/2008     | SCO-1     | Zr                   | 0.1707                    | 0.0023      | 160                                     | 30                | 2                 |
| 6/11/2008     | SCO-1     | Zr                   | 0.1707                    | 0.0023      | 160                                     | 30                | 2                 |

| Analysis Date | SRM       | Element <sup>A</sup> | FP-XRF                    |             | Standard reference material information |                   |                   |
|---------------|-----------|----------------------|---------------------------|-------------|-----------------------------------------|-------------------|-------------------|
|               |           |                      | signal (cps) <sup>B</sup> | uncertainty | concentration (ppm)                     | uncertainty (ppm) | flag <sup>C</sup> |
| 6/11/2008     | NIST-2709 | Ag                   | 0.0127                    | 0.0036      | 0.41                                    | 0.03              | 2                 |
| 6/11/2008     | NIST-2711 | Ag                   | 0.0138                    | 0.0036      | 4.63                                    | 0.39              | 2                 |
| 6/11/2008     | NIST-2711 | Ag                   | 0.0145                    | 0.0036      | 4.63                                    | 0.39              | 2                 |
| 6/11/2008     | MAG-1     | Ag                   | 0.0120                    | 0.0040      | 0.08                                    | 0.008             | 1                 |
| 6/11/2008     | NIST-2704 | Cd                   | 0.0120                    | 0.0039      | 3.45                                    | 0.22              | 2                 |
| 6/11/2008     | NIST-2709 | Cd                   | 0.0126                    | 0.0036      | 0.38                                    | 0.01              | 2                 |
| 6/11/2008     | NIST-2710 | Cd                   | 0.0144                    | 0.0042      | 21.8                                    | 0.2               | 2                 |
| 6/11/2008     | NIST-2711 | Cd                   | 0.0138                    | 0.0039      | 41.7                                    | 0.25              | 2                 |
| 6/11/2008     | NIST-2711 | Cd                   | 0.0225                    | 0.0039      | 41.7                                    | 0.25              | 2                 |
| 6/11/2008     | MAG-1     | Cd                   | 0.0144                    | 0.0039      | 0.2                                     | 0.03              | 2                 |
| 6/11/2008     | NIST-2704 | I-LEAP               | 0.0307                    | 0.0061      | 2                                       | 0.2               | 1                 |
| 6/11/2008     | NIST-2704 | I-LEAP               | 0.0253                    | 0.0060      | 2                                       | 0.2               | 1                 |
| 6/11/2008     | NIST-2709 | I-LEAP               | 0.0281                    | 0.0051      | 5                                       | 0.5               | 1                 |
| 6/11/2008     | NIST-2711 | I-LEAP               | 0.0247                    | 0.0053      | 3                                       | 0.3               | 1                 |
| 6/11/2008     | NIST-2711 | I-LEAP               | 0.0285                    | 0.0053      | 3                                       | 0.3               | 1                 |
| 6/11/2008     | MAG-1     | I-LEAP               | 0.0214                    | 0.0053      | 380                                     | 38                | 1                 |
| 6/11/2008     | MAG-1     | I-LEAP               | 0.0276                    | 0.0054      | 380                                     | 38                | 1                 |
| 6/11/2008     | NIST-2704 | Ba                   | 0.0707                    | 0.0050      | 414                                     | 12                | 2                 |
| 6/11/2008     | NIST-2704 | Ba                   | 0.0701                    | 0.0048      | 414                                     | 12                | 2                 |
| 6/11/2008     | NIST-2709 | Ba                   | 0.0902                    | 0.0046      | 968                                     | 40                | 2                 |
| 6/11/2008     | NIST-2709 | Ba                   | 0.0835                    | 0.0044      | 968                                     | 40                | 2                 |
| 6/11/2008     | NIST-2710 | Ba                   | 0.0777                    | 0.0050      | 707                                     | 51                | 2                 |
| 6/11/2008     | NIST-2711 | Ba                   | 0.0678                    | 0.0040      | 726                                     | 38                | 2                 |
| 6/11/2008     | NIST-2711 | Ba                   | 0.0693                    | 0.0040      | 726                                     | 38                | 2                 |
| 6/11/2008     | NIST-2586 | Ba                   | 0.0844                    | 0.0057      | 413                                     | 16.52             | 1                 |
| 6/11/2008     | MAG-1     | Ba                   | 0.0919                    | 0.0054      | 480                                     | 41                | 2                 |
| 6/11/2008     | MAG-1     | Ba                   | 0.0831                    | 0.0052      | 480                                     | 41                | 2                 |
| 6/11/2008     | SCO-1     | Ba                   | 0.0712                    | 0.0044      | 570                                     | 30                | 2                 |
| 6/11/2008     | SCO-1     | Ba                   | 0.0804                    | 0.0044      | 570                                     | 30                | 2                 |
| 6/11/2008     | NIST-2704 | Hg                   | 0.0012                    | 0.0003      | 1.44                                    | 0.07              | 2                 |
| 6/11/2008     | NIST-2704 | Hg                   | 0.0012                    | 0.0003      | 1.44                                    | 0.07              | 2                 |
| 6/11/2008     | NIST-2709 | Hg                   | 0.0007                    | 0.0003      | 1.4                                     | 0.08              | 2                 |
| 6/11/2008     | NIST-2710 | Hg                   | 0.0131                    | 0.0008      | 32.6                                    | 1.8               | 2                 |
| 6/11/2008     | NIST-2711 | Hg                   | 0.0020                    | 0.0003      | 6.25                                    | 0.19              | 2                 |
| 6/11/2008     | NIST-2711 | Hg                   | 0.0016                    | 0.0003      | 6.25                                    | 0.19              | 2                 |

| Analysis Date | SRM       | Element <sup>A</sup> | FP-XRF                    |             | Standard reference material information |                   |                   |
|---------------|-----------|----------------------|---------------------------|-------------|-----------------------------------------|-------------------|-------------------|
|               |           |                      | signal (cps) <sup>B</sup> | uncertainty | concentration (ppm)                     | uncertainty (ppm) | flag <sup>C</sup> |
| 6/11/2008     | NIST-2586 | Hg                   | 0.0009                    | 0.0003      | 0.37                                    | 0.04              | 1                 |
| 6/11/2008     | MAG-1     | Hg                   | 0.0011                    | 0.0003      | 0.02                                    | 0.002             | 1                 |
| 6/11/2008     | MAG-1     | Hg                   | 0.0009                    | 0.0003      | 0.02                                    | 0.002             | 1                 |
| 6/11/2008     | BCSS-1    | Pb                   | 0.0047                    | 0.0004      | 22.7                                    | 3.4               | 2                 |
| 6/11/2008     | MESS-1    | Pb                   | 0.0058                    | 0.0004      | 34                                      | 6.1               | 2                 |
| 6/11/2008     | NIST-2704 | Pb                   | 0.0309                    | 0.0009      | 161                                     | 17                | 2                 |
| 6/11/2008     | NIST-2704 | Pb                   | 0.0313                    | 0.0009      | 161                                     | 17                | 2                 |
| 6/11/2008     | NIST-2709 | Pb                   | 0.0022                    | 0.0004      | 18.9                                    | 0.5               | 2                 |
| 6/11/2008     | NIST-2709 | Pb                   | 0.0037                    | 0.0004      | 18.9                                    | 0.5               | 2                 |
| 6/11/2008     | NIST-2711 | Pb                   | 0.2368                    | 0.0022      | 1162                                    | 31                | 2                 |
| 6/11/2008     | NIST-2711 | Pb                   | 0.2362                    | 0.0022      | 1162                                    | 31                | 2                 |
| 6/11/2008     | NIST-2586 | Pb                   | 0.0864                    | 0.0013      | 432                                     | 17.28             | 2                 |
| 6/11/2008     | MAG-1     | Pb                   | 0.0047                    | 0.0004      | 24                                      | 3                 | 2                 |
| 6/11/2008     | MAG-1     | Pb                   | 0.0041                    | 0.0004      | 24                                      | 3                 | 2                 |
| 6/11/2008     | SCO-1     | Pb                   | 0.0058                    | 0.0004      | 31                                      | 3                 | 2                 |
| 6/11/2008     | SCO-1     | Pb                   | 0.0058                    | 0.0004      | 31                                      | 3                 | 2                 |
| 6/11/2008     | NIST-2704 | U                    | 0.0037                    | 0.0008      | 3.13                                    | 0.13              | 2                 |
| 6/11/2008     | NIST-2704 | U                    | 0.0042                    | 0.0008      | 3.13                                    | 0.13              | 2                 |
| 6/11/2008     | NIST-2709 | U                    | 0.0032                    | 0.0008      | 3                                       | 0.3               | 1                 |
| 6/11/2008     | NIST-2709 | U                    | 0.0029                    | 0.0008      | 3                                       | 0.3               | 1                 |
| 6/11/2008     | NIST-2710 | U                    | 0.0139                    | 0.0011      | 25                                      | 2.5               | 1                 |
| 6/11/2008     | NIST-2711 | U                    | 0.0053                    | 0.0008      | 2.6                                     | 0.26              | 1                 |
| 6/11/2008     | NIST-2711 | U                    | 0.0055                    | 0.0008      | 2.6                                     | 0.26              | 1                 |
| 6/11/2008     | MAG-1     | U                    | 0.0039                    | 0.0008      | 2.7                                     | 0.3               | 2                 |
| 6/11/2008     | MAG-1     | U                    | 0.0037                    | 0.0008      | 2.7                                     | 0.3               | 2                 |
| 6/12/2008     | BCSS-1    | K-LEAP               | 0.2911                    | 0.0048      | 18014                                   | 332               | 2                 |
| 6/12/2008     | NIST-2704 | K-LEAP               | 0.3844                    | 0.0060      | 20000                                   | 400               | 2                 |
| 6/12/2008     | NIST-2709 | K-LEAP               | 0.3178                    | 0.0051      | 20300                                   | 600               | 2                 |
| 6/12/2008     | NIST-2709 | K-LEAP               | 0.3207                    | 0.0052      | 20300                                   | 600               | 2                 |
| 6/12/2008     | NIST-2710 | K-LEAP               | 0.3730                    | 0.0062      | 21100                                   | 1100              | 2                 |
| 6/12/2008     | NIST-2711 | K-LEAP               | 0.3965                    | 0.0058      | 24500                                   | 800               | 2                 |
| 6/12/2008     | MAG-1     | K-LEAP               | 0.5110                    | 0.0073      | 29470                                   | 1411              | 2                 |
| 6/12/2008     | SCO-1     | K-LEAP               | 0.3519                    | 0.0055      | 22995                                   | 664               | 2                 |
| 6/12/2008     | BCSS-1    | Ca-LEAP              | 0.1929                    | 0.0045      | 5432                                    | 529               | 2                 |
| 6/12/2008     | NIST-2704 | Ca-LEAP              | 0.9976                    | 0.0115      | 26000                                   | 300               | 2                 |

| Analysis Date | SRM       | Element <sup>A</sup> | FP-XRF                    |             | Standard reference material information |                   |                   |
|---------------|-----------|----------------------|---------------------------|-------------|-----------------------------------------|-------------------|-------------------|
|               |           |                      | signal (cps) <sup>B</sup> | uncertainty | concentration (ppm)                     | uncertainty (ppm) | flag <sup>C</sup> |
| 6/12/2008     | NIST-2709 | Ca-LEAP              | 0.6613                    | 0.0084      | 18900                                   | 500               | 2                 |
| 6/12/2008     | NIST-2709 | Ca-LEAP              | 0.6652                    | 0.0084      | 18900                                   | 500               | 2                 |
| 6/12/2008     | NIST-2710 | Ca-LEAP              | 0.4501                    | 0.0075      | 12500                                   | 300               | 2                 |
| 6/12/2008     | NIST-2711 | Ca-LEAP              | 1.0155                    | 0.0111      | 28800                                   | 800               | 2                 |
| 6/12/2008     | MAG-1     | Ca-LEAP              | 0.3562                    | 0.0067      | 9791                                    | 715               | 2                 |
| 6/12/2008     | SCO-1     | Ca-LEAP              | 0.6741                    | 0.0086      | 18725                                   | 1429              | 2                 |
| 6/12/2008     | BCSS-1    | Ti-LEAP              | 0.3952                    | 0.0088      | 4400                                    | 144               | 2                 |
| 6/12/2008     | NIST-2704 | Ti-LEAP              | 0.4375                    | 0.0101      | 4570                                    | 180               | 2                 |
| 6/12/2008     | NIST-2709 | Ti-LEAP              | 0.3144                    | 0.0085      | 3420                                    | 240               | 2                 |
| 6/12/2008     | NIST-2709 | Ti-LEAP              | 0.2934                    | 0.0084      | 3420                                    | 240               | 2                 |
| 6/12/2008     | NIST-2710 | Ti-LEAP              | 0.2816                    | 0.0094      | 2830                                    | 100               | 2                 |
| 6/12/2008     | NIST-2711 | Ti-LEAP              | 0.2568                    | 0.0077      | 3060                                    | 230               | 2                 |
| 6/12/2008     | MAG-1     | Ti-LEAP              | 0.3973                    | 0.0104      | 4496                                    | 420               | 2                 |
| 6/12/2008     | SCO-1     | Ti-LEAP              | 0.3059                    | 0.0084      | 3776                                    | 360               | 2                 |
| 6/12/2008     | BCSS-1    | Ti                   | 0.0204                    | 0.0007      | 4400                                    | 144               | 2                 |
| 6/12/2008     | NIST-2704 | Ti                   | 0.0250                    | 0.0008      | 4570                                    | 180               | 2                 |
| 6/12/2008     | NIST-2709 | Ti                   | 0.0158                    | 0.0006      | 3420                                    | 240               | 2                 |
| 6/12/2008     | NIST-2709 | Ti                   | 0.0176                    | 0.0006      | 3420                                    | 240               | 2                 |
| 6/12/2008     | NIST-2711 | Ti                   | 0.0154                    | 0.0006      | 3060                                    | 230               | 2                 |
| 6/12/2008     | MAG-1     | Ti                   | 0.0217                    | 0.0008      | 4496                                    | 420               | 2                 |
| 6/12/2008     | SCO-1     | Ti                   | 0.0164                    | 0.0006      | 3776                                    | 360               | 2                 |
| 6/12/2008     | BCSS-1    | V                    | 0.0019                    | 0.0004      | 93.4                                    | 4.9               | 2                 |
| 6/12/2008     | NIST-2704 | V                    | 0.0015                    | 0.0004      | 95                                      | 4                 | 2                 |
| 6/12/2008     | NIST-2709 | V                    | 0.0029                    | 0.0004      | 112                                     | 5                 | 2                 |
| 6/12/2008     | NIST-2709 | V                    | 0.0027                    | 0.0004      | 112                                     | 5                 | 2                 |
| 6/12/2008     | NIST-2710 | V                    | 0.0028                    | 0.0006      | 76.6                                    | 2.3               | 2                 |
| 6/12/2008     | NIST-2711 | V                    | 0.0021                    | 0.0004      | 81.6                                    | 2.9               | 2                 |
| 6/12/2008     | MAG-1     | V                    | 0.0024                    | 0.0005      | 140                                     | 6                 | 2                 |
| 6/12/2008     | SCO-1     | V                    | 0.0028                    | 0.0004      | 130                                     | 13                | 2                 |
| 6/12/2008     | BCSS-1    | Cr-LEAP              | 0.0432                    | 0.0028      | 123                                     | 14                | 2                 |
| 6/12/2008     | NIST-2704 | Cr-LEAP              | 0.0467                    | 0.0032      | 135                                     | 5                 | 2                 |
| 6/12/2008     | NIST-2709 | Cr-LEAP              | 0.0442                    | 0.0032      | 130                                     | 4                 | 2                 |
| 6/12/2008     | NIST-2709 | Cr-LEAP              | 0.0375                    | 0.0028      | 130                                     | 4                 | 2                 |
| 6/12/2008     | NIST-2711 | Cr-LEAP              | 0.0123                    | 0.0025      | 47                                      | 4.7               | 1                 |
| 6/12/2008     | MAG-1     | Cr-LEAP              | 0.0350                    | 0.0035      | 97                                      | 8                 | 2                 |



| Analysis Date | SRM       | Element <sup>A</sup> | FP-XRF                    |             | Standard reference material information |                   |                   |
|---------------|-----------|----------------------|---------------------------|-------------|-----------------------------------------|-------------------|-------------------|
|               |           |                      | signal (cps) <sup>B</sup> | uncertainty | concentration (ppm)                     | uncertainty (ppm) | flag <sup>C</sup> |
| 6/12/2008     | SCO-1     | Cr-LEAP              | 0.0227                    | 0.0028      | 68                                      | 5                 | 2                 |
| 6/12/2008     | BCSS-1    | Cr                   | 0.0028                    | 0.0004      | 123                                     | 14                | 2                 |
| 6/12/2008     | NIST-2704 | Cr                   | 0.0030                    | 0.0004      | 135                                     | 5                 | 2                 |
| 6/12/2008     | NIST-2709 | Cr                   | 0.0019                    | 0.0004      | 130                                     | 4                 | 2                 |
| 6/12/2008     | NIST-2709 | Cr                   | 0.0020                    | 0.0004      | 130                                     | 4                 | 2                 |
| 6/12/2008     | NIST-2711 | Cr                   | 0.0015                    | 0.0004      | 47                                      | 4.7               | 1                 |
| 6/12/2008     | MAG-1     | Cr                   | 0.0018                    | 0.0005      | 97                                      | 8                 | 2                 |
| 6/12/2008     | SCO-1     | Cr                   | 0.0016                    | 0.0004      | 68                                      | 5                 | 2                 |
| 6/12/2008     | BCSS-1    | Mn-LEAP              | 0.0627                    | 0.0042      | 229                                     | 15                | 2                 |
| 6/12/2008     | NIST-2704 | Mn-LEAP              | 0.2019                    | 0.0059      | 555                                     | 19                | 2                 |
| 6/12/2008     | NIST-2709 | Mn-LEAP              | 0.1827                    | 0.0050      | 538                                     | 17                | 2                 |
| 6/12/2008     | NIST-2709 | Mn-LEAP              | 0.1835                    | 0.0050      | 538                                     | 17                | 2                 |
| 6/12/2008     | NIST-2711 | Mn-LEAP              | 0.2253                    | 0.0050      | 638                                     | 28                | 2                 |
| 6/12/2008     | MAG-1     | Mn-LEAP              | 0.2775                    | 0.0067      | 759                                     | 70                | 2                 |
| 6/12/2008     | SCO-1     | Mn-LEAP              | 0.1162                    | 0.0046      | 410                                     | 30                | 2                 |
| 6/12/2008     | BCSS-1    | Mn                   | 0.0042                    | 0.0005      | 229                                     | 15                | 2                 |
| 6/12/2008     | NIST-2704 | Mn                   | 0.0132                    | 0.0007      | 555                                     | 19                | 2                 |
| 6/12/2008     | NIST-2709 | Mn                   | 0.0124                    | 0.0006      | 538                                     | 17                | 2                 |
| 6/12/2008     | NIST-2709 | Mn                   | 0.0103                    | 0.0006      | 538                                     | 17                | 2                 |
| 6/12/2008     | NIST-2711 | Mn                   | 0.0126                    | 0.0006      | 638                                     | 28                | 2                 |
| 6/12/2008     | MAG-1     | Mn                   | 0.0171                    | 0.0008      | 759                                     | 70                | 2                 |
| 6/12/2008     | SCO-1     | Mn                   | 0.0069                    | 0.0006      | 410                                     | 30                | 2                 |
| 6/12/2008     | BCSS-1    | Fe-LEAP              | 17.2098                   | 0.1331      | 32873                                   | 979               | 2                 |
| 6/12/2008     | NIST-2704 | Fe-LEAP              | 21.5783                   | 0.1743      | 41100                                   | 1000              | 2                 |
| 6/12/2008     | NIST-2709 | Fe-LEAP              | 18.4605                   | 0.1428      | 35000                                   | 1100              | 2                 |
| 6/12/2008     | NIST-2709 | Fe-LEAP              | 18.7500                   | 0.1455      | 35000                                   | 1100              | 2                 |
| 6/12/2008     | NIST-2711 | Fe-LEAP              | 14.1969                   | 0.1102      | 28900                                   | 600               | 2                 |
| 6/12/2008     | MAG-1     | Fe-LEAP              | 26.4957                   | 0.2205      | 47561                                   | 4197              | 2                 |
| 6/12/2008     | SCO-1     | Fe-LEAP              | 18.0798                   | 0.1412      | 35881                                   | 1259              | 2                 |
| 6/12/2008     | BCSS-1    | Fe                   | 1.1017                    | 0.0057      | 32873                                   | 979               | 2                 |
| 6/12/2008     | NIST-2704 | Fe                   | 1.4316                    | 0.0073      | 41100                                   | 1000              | 2                 |
| 6/12/2008     | NIST-2709 | Fe                   | 1.1372                    | 0.0058      | 35000                                   | 1100              | 2                 |
| 6/12/2008     | NIST-2709 | Fe                   | 1.1643                    | 0.0059      | 35000                                   | 1100              | 2                 |
| 6/12/2008     | NIST-2711 | Fe                   | 0.9415                    | 0.0051      | 28900                                   | 600               | 2                 |
| 6/12/2008     | MAG-1     | Fe                   | 1.7227                    | 0.0086      | 47561                                   | 4197              | 2                 |

| Analysis Date | SRM       | Element <sup>A</sup> | FP-XRF                    |             | Standard reference material information |                   |                   |
|---------------|-----------|----------------------|---------------------------|-------------|-----------------------------------------|-------------------|-------------------|
|               |           |                      | signal (cps) <sup>B</sup> | uncertainty | concentration (ppm)                     | uncertainty (ppm) | flag <sup>C</sup> |
| 6/12/2008     | SCO-1     | Fe                   | 1.1522                    | 0.0059      | 35881                                   | 1259              | 2                 |
| 6/12/2008     | BCSS-1    | Co                   | 0.0127                    | 0.0017      | 11.4                                    | 2.1               | 2                 |
| 6/12/2008     | NIST-2704 | Co                   | 0.0167                    | 0.0020      | 14                                      | 0.6               | 2                 |
| 6/12/2008     | NIST-2709 | Co                   | 0.0175                    | 0.0017      | 13.4                                    | 0.7               | 2                 |
| 6/12/2008     | NIST-2709 | Co                   | 0.0129                    | 0.0017      | 13.4                                    | 0.7               | 2                 |
| 6/12/2008     | NIST-2711 | Co                   | 0.0141                    | 0.0016      | 10                                      | 1                 | 1                 |
| 6/12/2008     | MAG-1     | Co                   | 0.0222                    | 0.0022      | 20                                      | 1.6               | 2                 |
| 6/12/2008     | SCO-1     | Co                   | 0.0146                    | 0.0017      | 11                                      | 0.8               | 2                 |
| 6/12/2008     | BCSS-1    | Ni                   | 0.0041                    | 0.0006      | 55.3                                    | 3.6               | 2                 |
| 6/12/2008     | NIST-2704 | Ni                   | 0.0032                    | 0.0006      | 44.1                                    | 3                 | 2                 |
| 6/12/2008     | NIST-2709 | Ni                   | 0.0046                    | 0.0006      | 88                                      | 5                 | 2                 |
| 6/12/2008     | NIST-2709 | Ni                   | 0.0046                    | 0.0006      | 88                                      | 5                 | 2                 |
| 6/12/2008     | SCO-1     | Ni                   | 0.0020                    | 0.0006      | 27                                      | 4                 | 2                 |
| 6/12/2008     | NIST-2704 | Cu                   | 0.0082                    | 0.0005      | 98.6                                    | 5                 | 2                 |
| 6/12/2008     | NIST-2709 | Cu                   | 0.0036                    | 0.0004      | 34.6                                    | 0.7               | 2                 |
| 6/12/2008     | NIST-2709 | Cu                   | 0.0031                    | 0.0004      | 34.6                                    | 0.7               | 2                 |
| 6/12/2008     | NIST-2711 | Cu                   | 0.0102                    | 0.0005      | 114                                     | 2                 | 2                 |
| 6/12/2008     | MAG-1     | Cu                   | 0.0018                    | 0.0004      | 30                                      | 3                 | 2                 |
| 6/12/2008     | SCO-1     | Cu                   | 0.0023                    | 0.0004      | 29                                      | 2                 | 2                 |
| 6/12/2008     | BCSS-1    | Zn                   | 0.0135                    | 0.0004      | 119                                     | 12                | 2                 |
| 6/12/2008     | NIST-2704 | Zn                   | 0.0565                    | 0.0010      | 438                                     | 12                | 2                 |
| 6/12/2008     | NIST-2709 | Zn                   | 0.0127                    | 0.0004      | 106                                     | 3                 | 2                 |
| 6/12/2008     | NIST-2709 | Zn                   | 0.0124                    | 0.0004      | 106                                     | 3                 | 2                 |
| 6/12/2008     | NIST-2711 | Zn                   | 0.0457                    | 0.0009      | 350.4                                   | 4.8               | 2                 |
| 6/12/2008     | MAG-1     | Zn                   | 0.0168                    | 0.0006      | 130                                     | 6                 | 2                 |
| 6/12/2008     | SCO-1     | Zn                   | 0.0126                    | 0.0004      | 100                                     | 8                 | 2                 |
| 6/12/2008     | BCSS-1    | As                   | 0.0029                    | 0.0005      | 11.1                                    | 1.4               | 2                 |
| 6/12/2008     | NIST-2704 | As                   | 0.0051                    | 0.0011      | 23.4                                    | 0.8               | 2                 |
| 6/12/2008     | NIST-2709 | As                   | 0.0048                    | 0.0005      | 17.7                                    | 0.8               | 2                 |
| 6/12/2008     | NIST-2709 | As                   | 0.0051                    | 0.0005      | 17.7                                    | 0.8               | 2                 |
| 6/12/2008     | NIST-2710 | As                   | 0.1362                    | 0.0062      | 626                                     | 38                | 2                 |
| 6/12/2008     | NIST-2711 | As                   | 0.0147                    | 0.0024      | 105                                     | 8                 | 2                 |
| 6/12/2008     | MAG-1     | As                   | 0.0024                    | 0.0005      | 9.2                                     | 0.92              | 1                 |
| 6/12/2008     | SCO-1     | As                   | 0.0038                    | 0.0005      | 12                                      | 1                 | 2                 |
| 6/12/2008     | NIST-2704 | Br                   | 0.0030                    | 0.0004      | 7                                       | 0.7               | 1                 |

| Analysis Date | SRM       | Element <sup>A</sup> | FP-XRF                    |             | Standard reference material information |                   |                   |
|---------------|-----------|----------------------|---------------------------|-------------|-----------------------------------------|-------------------|-------------------|
|               |           |                      | signal (cps) <sup>B</sup> | uncertainty | concentration (ppm)                     | uncertainty (ppm) | flag <sup>C</sup> |
| 6/12/2008     | NIST-2710 | Br                   | 0.0069                    | 0.0013      | 6                                       | 0.6               | 1                 |
| 6/12/2008     | NIST-2711 | Br                   | 0.0026                    | 0.0004      | 5                                       | 0.5               | 1                 |
| 6/12/2008     | MAG-1     | Br                   | 0.1063                    | 0.0013      | 250                                     | 25                | 1                 |
| 6/12/2008     | NIST-2704 | Rb                   | 0.0664                    | 0.0014      | 100                                     | 10                | 1                 |
| 6/12/2008     | NIST-2709 | Rb                   | 0.0558                    | 0.0014      | 96                                      | 9.6               | 1                 |
| 6/12/2008     | NIST-2709 | Rb                   | 0.0600                    | 0.0014      | 96                                      | 9.6               | 1                 |
| 6/12/2008     | NIST-2710 | Rb                   | 0.0805                    | 0.0021      | 120                                     | 12                | 1                 |
| 6/12/2008     | NIST-2711 | Rb                   | 0.0727                    | 0.0014      | 110                                     | 11                | 1                 |
| 6/12/2008     | MAG-1     | Rb                   | 0.0918                    | 0.0014      | 150                                     | 6                 | 2                 |
| 6/12/2008     | SCO-1     | Rb                   | 0.0720                    | 0.0014      | 110                                     | 4                 | 2                 |
| 6/12/2008     | BCSS-1    | Sr                   | 0.0768                    | 0.0008      | 96                                      | 9.6               | 1                 |
| 6/12/2008     | NIST-2704 | Sr                   | 0.1003                    | 0.0016      | 130                                     | 13                | 1                 |
| 6/12/2008     | NIST-2709 | Sr                   | 0.1638                    | 0.0016      | 231                                     | 2                 | 2                 |
| 6/12/2008     | NIST-2709 | Sr                   | 0.1716                    | 0.0016      | 231                                     | 2                 | 2                 |
| 6/12/2008     | NIST-2710 | Sr                   | 0.2507                    | 0.0024      | 330                                     | 33                | 1                 |
| 6/12/2008     | NIST-2711 | Sr                   | 0.1857                    | 0.0016      | 245.3                                   | 0.7               | 2                 |
| 6/12/2008     | MAG-1     | Sr                   | 0.1027                    | 0.0016      | 150                                     | 15                | 2                 |
| 6/12/2008     | SCO-1     | Sr                   | 0.1246                    | 0.0016      | 170                                     | 16                | 2                 |
| 6/12/2008     | NIST-2704 | Zr                   | 0.3168                    | 0.0023      | 300                                     | 30                | 1                 |
| 6/12/2008     | NIST-2709 | Zr                   | 0.1555                    | 0.0023      | 160                                     | 16                | 1                 |
| 6/12/2008     | NIST-2709 | Zr                   | 0.1391                    | 0.0023      | 160                                     | 16                | 1                 |
| 6/12/2008     | NIST-2711 | Zr                   | 0.2735                    | 0.0023      | 230                                     | 23                | 1                 |
| 6/12/2008     | MAG-1     | Zr                   | 0.1274                    | 0.0023      | 130                                     | 13                | 2                 |
| 6/12/2008     | SCO-1     | Zr                   | 0.1730                    | 0.0023      | 160                                     | 30                | 2                 |
| 6/12/2008     | NIST-2709 | Cd                   | 0.0156                    | 0.0036      | 0.38                                    | 0.01              | 2                 |
| 6/12/2008     | NIST-2710 | Cd                   | 0.0138                    | 0.0042      | 21.8                                    | 0.2               | 2                 |
| 6/12/2008     | NIST-2711 | Cd                   | 0.0258                    | 0.0036      | 41.7                                    | 0.25              | 2                 |
| 6/12/2008     | NIST-2704 | I-LEAP               | 0.0379                    | 0.0061      | 2                                       | 0.2               | 1                 |
| 6/12/2008     | NIST-2709 | I-LEAP               | 0.0173                    | 0.0050      | 5                                       | 0.5               | 1                 |
| 6/12/2008     | NIST-2711 | I-LEAP               | 0.0260                    | 0.0053      | 3                                       | 0.3               | 1                 |
| 6/12/2008     | NIST-2704 | Ba                   | 0.0733                    | 0.0050      | 414                                     | 12                | 2                 |
| 6/12/2008     | NIST-2709 | Ba                   | 0.0787                    | 0.0044      | 968                                     | 40                | 2                 |
| 6/12/2008     | NIST-2709 | Ba                   | 0.0858                    | 0.0044      | 968                                     | 40                | 2                 |
| 6/12/2008     | NIST-2710 | Ba                   | 0.0789                    | 0.0050      | 707                                     | 51                | 2                 |
| 6/12/2008     | NIST-2711 | Ba                   | 0.0661                    | 0.0040      | 726                                     | 38                | 2                 |

| Analysis Date | SRM       | Element <sup>A</sup> | FP-XRF                    |             | Standard reference material information |                   |                   |
|---------------|-----------|----------------------|---------------------------|-------------|-----------------------------------------|-------------------|-------------------|
|               |           |                      | signal (cps) <sup>B</sup> | uncertainty | concentration (ppm)                     | uncertainty (ppm) | flag <sup>C</sup> |
| 6/12/2008     | MAG-1     | Ba                   | 0.0940                    | 0.0054      | 480                                     | 41                | 2                 |
| 6/12/2008     | SCO-1     | Ba                   | 0.0741                    | 0.0044      | 570                                     | 30                | 2                 |
| 6/12/2008     | NIST-2704 | Hg                   | 0.0009                    | 0.0003      | 1.44                                    | 0.07              | 2                 |
| 6/12/2008     | NIST-2709 | Hg                   | 0.0009                    | 0.0003      | 1.4                                     | 0.08              | 2                 |
| 6/12/2008     | NIST-2710 | Hg                   | 0.0123                    | 0.0008      | 32.6                                    | 1.8               | 2                 |
| 6/12/2008     | NIST-2711 | Hg                   | 0.0022                    | 0.0003      | 6.25                                    | 0.19              | 2                 |
| 6/12/2008     | BCSS-1    | Pb                   | 0.0045                    | 0.0004      | 22.7                                    | 3.4               | 2                 |
| 6/12/2008     | NIST-2704 | Pb                   | 0.0302                    | 0.0009      | 161                                     | 17                | 2                 |
| 6/12/2008     | NIST-2709 | Pb                   | 0.0032                    | 0.0004      | 18.9                                    | 0.5               | 2                 |
| 6/12/2008     | NIST-2709 | Pb                   | 0.0032                    | 0.0004      | 18.9                                    | 0.5               | 2                 |
| 6/12/2008     | NIST-2711 | Pb                   | 0.2364                    | 0.0022      | 1162                                    | 31                | 2                 |
| 6/12/2008     | MAG-1     | Pb                   | 0.0054                    | 0.0004      | 24                                      | 3                 | 2                 |
| 6/12/2008     | SCO-1     | Pb                   | 0.0052                    | 0.0004      | 31                                      | 3                 | 2                 |
| 6/12/2008     | NIST-2704 | U                    | 0.0029                    | 0.0008      | 3.13                                    | 0.13              | 2                 |
| 6/12/2008     | NIST-2709 | U                    | 0.0037                    | 0.0008      | 3                                       | 0.3               | 1                 |
| 6/12/2008     | NIST-2709 | U                    | 0.0026                    | 0.0008      | 3                                       | 0.3               | 1                 |
| 6/12/2008     | NIST-2710 | U                    | 0.0105                    | 0.0011      | 25                                      | 2.5               | 1                 |
| 6/12/2008     | NIST-2711 | U                    | 0.0060                    | 0.0008      | 2.6                                     | 0.26              | 1                 |
| 6/12/2008     | MAG-1     | U                    | 0.0037                    | 0.0008      | 2.7                                     | 0.3               | 2                 |
| 6/16/2008     | BCSS-1    | S-LEAP               | 0.0066                    | 0.0016      | 3600                                    | 500               | 2                 |
| 6/16/2008     | MESS-1    | S-LEAP               | 0.0083                    | 0.0016      | 7200                                    | 500               | 2                 |
| 6/16/2008     | MESS-1    | S-LEAP               | 0.0082                    | 0.0016      | 7200                                    | 500               | 2                 |
| 6/16/2008     | NIST-2710 | S-LEAP               | 0.0079                    | 0.0020      | 2400                                    | 60                | 2                 |
| 6/16/2008     | SDO-1     | S-LEAP               | 0.0406                    | 0.0026      | 53500                                   | 4400              | 2                 |
| 6/16/2008     | SDO-1     | S-LEAP               | 0.0365                    | 0.0026      | 53500                                   | 4400              | 2                 |
| 6/16/2008     | MAG-1     | Cl-LEAP              | 0.0997                    | 0.0034      | 31000                                   | 600               | 2                 |
| 6/16/2008     | BCSS-1    | Cl-LEAP              | 0.0392                    | 0.0025      | 11200                                   | 500               | 2                 |
| 6/16/2008     | MESS-1    | Cl-LEAP              | 0.0441                    | 0.0025      | 8200                                    | 700               | 2                 |
| 6/16/2008     | MESS-1    | Cl-LEAP              | 0.0359                    | 0.0024      | 8200                                    | 700               | 2                 |
| 6/16/2008     | MAG-1     | Cl-LEAP              | 0.0947                    | 0.0036      | 31000                                   | 600               | 2                 |
| 6/16/2008     | NIST-2704 | K-LEAP               | 0.3783                    | 0.0059      | 20000                                   | 400               | 2                 |
| 6/16/2008     | MAG-1     | K-LEAP               | 0.5116                    | 0.0070      | 29470                                   | 1411              | 2                 |
| 6/16/2008     | BCSS-1    | K-LEAP               | 0.2864                    | 0.0048      | 18014                                   | 332               | 2                 |
| 6/16/2008     | MESS-1    | K-LEAP               | 0.2909                    | 0.0047      | 18595                                   | 332               | 2                 |
| 6/16/2008     | MESS-1    | K-LEAP               | 0.2851                    | 0.0047      | 18595                                   | 332               | 2                 |

| Analysis Date | SRM       | Element <sup>A</sup> | FP-XRF                    |             | Standard reference material information |                   |                   |
|---------------|-----------|----------------------|---------------------------|-------------|-----------------------------------------|-------------------|-------------------|
|               |           |                      | signal (cps) <sup>B</sup> | uncertainty | concentration (ppm)                     | uncertainty (ppm) | flag <sup>C</sup> |
| 6/16/2008     | NIST-2704 | K-LEAP               | 0.3816                    | 0.0060      | 20000                                   | 400               | 2                 |
| 6/16/2008     | NIST-2709 | K-LEAP               | 0.3178                    | 0.0052      | 20300                                   | 600               | 2                 |
| 6/16/2008     | NIST-2710 | K-LEAP               | 0.3604                    | 0.0060      | 21100                                   | 1100              | 2                 |
| 6/16/2008     | NIST-2710 | K-LEAP               | 0.3915                    | 0.0064      | 21100                                   | 1100              | 2                 |
| 6/16/2008     | NIST-2711 | K-LEAP               | 0.3975                    | 0.0057      | 24500                                   | 800               | 2                 |
| 6/16/2008     | NIST-2711 | K-LEAP               | 0.3948                    | 0.0058      | 24500                                   | 800               | 2                 |
| 6/16/2008     | NIST-2586 | K-LEAP               | 0.1897                    | 0.0044      | 9760                                    | 195.2             | 1                 |
| 6/16/2008     | MAG-1     | K-LEAP               | 0.5178                    | 0.0074      | 29470                                   | 1411              | 2                 |
| 6/16/2008     | SCO-1     | K-LEAP               | 0.3635                    | 0.0056      | 22995                                   | 664               | 2                 |
| 6/16/2008     | SCO-1     | K-LEAP               | 0.3703                    | 0.0056      | 22995                                   | 664               | 2                 |
| 6/16/2008     | SDO-1     | K-LEAP               | 0.5150                    | 0.0075      | 27810                                   | 506               | 2                 |
| 6/16/2008     | SDO-1     | K-LEAP               | 0.5219                    | 0.0076      | 27810                                   | 506               | 2                 |
| 6/16/2008     | NIST-2704 | Ca-LEAP              | 0.9768                    | 0.0112      | 26000                                   | 300               | 2                 |
| 6/16/2008     | MAG-1     | Ca-LEAP              | 0.3316                    | 0.0063      | 9791                                    | 715               | 2                 |
| 6/16/2008     | BCSS-1    | Ca-LEAP              | 0.1838                    | 0.0045      | 5432                                    | 529               | 2                 |
| 6/16/2008     | MESS-1    | Ca-LEAP              | 0.1516                    | 0.0041      | 4817                                    | 457               | 2                 |
| 6/16/2008     | MESS-1    | Ca-LEAP              | 0.1503                    | 0.0041      | 4817                                    | 457               | 2                 |
| 6/16/2008     | NIST-2704 | Ca-LEAP              | 0.9960                    | 0.0115      | 26000                                   | 300               | 2                 |
| 6/16/2008     | NIST-2709 | Ca-LEAP              | 0.6438                    | 0.0083      | 18900                                   | 500               | 2                 |
| 6/16/2008     | NIST-2710 | Ca-LEAP              | 0.4231                    | 0.0072      | 12500                                   | 300               | 2                 |
| 6/16/2008     | NIST-2710 | Ca-LEAP              | 0.4491                    | 0.0075      | 12500                                   | 300               | 2                 |
| 6/16/2008     | NIST-2711 | Ca-LEAP              | 0.9961                    | 0.0109      | 28800                                   | 800               | 2                 |
| 6/16/2008     | NIST-2711 | Ca-LEAP              | 1.0089                    | 0.0110      | 28800                                   | 800               | 2                 |
| 6/16/2008     | NIST-2586 | Ca-LEAP              | 0.7694                    | 0.0099      | 22180                                   | 443.6             | 1                 |
| 6/16/2008     | MAG-1     | Ca-LEAP              | 0.3348                    | 0.0065      | 9791                                    | 715               | 2                 |
| 6/16/2008     | SCO-1     | Ca-LEAP              | 0.6900                    | 0.0087      | 18725                                   | 1429              | 2                 |
| 6/16/2008     | SCO-1     | Ca-LEAP              | 0.6774                    | 0.0086      | 18725                                   | 1429              | 2                 |
| 6/16/2008     | SDO-1     | Ca-LEAP              | 0.2730                    | 0.0062      | 7504                                    | 336               | 2                 |
| 6/16/2008     | SDO-1     | Ca-LEAP              | 0.2716                    | 0.0062      | 7504                                    | 336               | 2                 |
| 6/16/2008     | NIST-2704 | Ti-LEAP              | 0.4323                    | 0.0099      | 4570                                    | 180               | 2                 |
| 6/16/2008     | MAG-1     | Ti-LEAP              | 0.3751                    | 0.0099      | 4496                                    | 420               | 2                 |
| 6/16/2008     | BCSS-1    | Ti-LEAP              | 0.3713                    | 0.0087      | 4400                                    | 144               | 2                 |
| 6/16/2008     | MESS-1    | Ti-LEAP              | 0.4287                    | 0.0090      | 5425                                    | 168               | 2                 |
| 6/16/2008     | MESS-1    | Ti-LEAP              | 0.4393                    | 0.0091      | 5425                                    | 168               | 2                 |
| 6/16/2008     | NIST-2704 | Ti-LEAP              | 0.4248                    | 0.0100      | 4570                                    | 180               | 2                 |

| Analysis Date | SRM       | Element <sup>A</sup> | FP-XRF                    |             | Standard reference material information |                   |                   |
|---------------|-----------|----------------------|---------------------------|-------------|-----------------------------------------|-------------------|-------------------|
|               |           |                      | signal (cps) <sup>B</sup> | uncertainty | concentration (ppm)                     | uncertainty (ppm) | flag <sup>C</sup> |
| 6/16/2008     | NIST-2709 | Ti-LEAP              | 0.2965                    | 0.0084      | 3420                                    | 240               | 2                 |
| 6/16/2008     | NIST-2710 | Ti-LEAP              | 0.2667                    | 0.0091      | 2830                                    | 100               | 2                 |
| 6/16/2008     | NIST-2710 | Ti-LEAP              | 0.2714                    | 0.0094      | 2830                                    | 100               | 2                 |
| 6/16/2008     | NIST-2711 | Ti-LEAP              | 0.2459                    | 0.0076      | 3060                                    | 230               | 2                 |
| 6/16/2008     | NIST-2711 | Ti-LEAP              | 0.2501                    | 0.0076      | 3060                                    | 230               | 2                 |
| 6/16/2008     | NIST-2586 | Ti-LEAP              | 0.6168                    | 0.0123      | 6050                                    | 665.5             | 1                 |
| 6/16/2008     | MAG-1     | Ti-LEAP              | 0.3977                    | 0.0104      | 4496                                    | 420               | 2                 |
| 6/16/2008     | SCO-1     | Ti-LEAP              | 0.3016                    | 0.0085      | 3776                                    | 360               | 2                 |
| 6/16/2008     | SCO-1     | Ti-LEAP              | 0.2788                    | 0.0083      | 3776                                    | 360               | 2                 |
| 6/16/2008     | SDO-1     | Ti-LEAP              | 0.3998                    | 0.0108      | 4256                                    | 186               | 2                 |
| 6/16/2008     | SDO-1     | Ti-LEAP              | 0.4183                    | 0.0112      | 4256                                    | 186               | 2                 |
| 6/16/2008     | NIST-2704 | Ti                   | 0.0241                    | 0.0008      | 4570                                    | 180               | 2                 |
| 6/16/2008     | BCSS-1    | Ti                   | 0.0199                    | 0.0006      | 4400                                    | 144               | 2                 |
| 6/16/2008     | MESS-1    | Ti                   | 0.0232                    | 0.0007      | 5425                                    | 168               | 2                 |
| 6/16/2008     | MESS-1    | Ti                   | 0.0248                    | 0.0007      | 5425                                    | 168               | 2                 |
| 6/16/2008     | NIST-2704 | Ti                   | 0.0243                    | 0.0008      | 4570                                    | 180               | 2                 |
| 6/16/2008     | NIST-2709 | Ti                   | 0.0159                    | 0.0006      | 3420                                    | 240               | 2                 |
| 6/16/2008     | MAG-1     | Ti                   | 0.0227                    | 0.0008      | 4496                                    | 420               | 2                 |
| 6/16/2008     | NIST-2711 | Ti                   | 0.0156                    | 0.0006      | 3060                                    | 230               | 2                 |
| 6/16/2008     | NIST-2711 | Ti                   | 0.0156                    | 0.0006      | 3060                                    | 230               | 2                 |
| 6/16/2008     | NIST-2586 | Ti                   | 0.0339                    | 0.0009      | 6050                                    | 665.5             | 1                 |
| 6/16/2008     | MAG-1     | Ti                   | 0.0214                    | 0.0008      | 4496                                    | 420               | 2                 |
| 6/16/2008     | SCO-1     | Ti                   | 0.0170                    | 0.0006      | 3776                                    | 360               | 2                 |
| 6/16/2008     | SCO-1     | Ti                   | 0.0170                    | 0.0006      | 3776                                    | 360               | 2                 |
| 6/16/2008     | SDO-1     | Ti                   | 0.0226                    | 0.0008      | 4256                                    | 186               | 2                 |
| 6/16/2008     | SDO-1     | Ti                   | 0.0231                    | 0.0008      | 4256                                    | 186               | 2                 |
| 6/16/2008     | NIST-2704 | V                    | 0.0023                    | 0.0004      | 95                                      | 4                 | 2                 |
| 6/16/2008     | MAG-1     | V                    | 0.0025                    | 0.0005      | 140                                     | 6                 | 2                 |
| 6/16/2008     | MESS-1    | V                    | 0.0021                    | 0.0004      | 72.4                                    | 17                | 2                 |
| 6/16/2008     | NIST-2704 | V                    | 0.0023                    | 0.0005      | 95                                      | 4                 | 2                 |
| 6/16/2008     | NIST-2709 | V                    | 0.0036                    | 0.0004      | 112                                     | 5                 | 2                 |
| 6/16/2008     | NIST-2710 | V                    | 0.0033                    | 0.0006      | 76.6                                    | 2.3               | 2                 |
| 6/16/2008     | NIST-2711 | V                    | 0.0018                    | 0.0004      | 81.6                                    | 2.9               | 2                 |
| 6/16/2008     | NIST-2586 | V                    | 0.0024                    | 0.0005      | 160                                     | 16                | 1                 |
| 6/16/2008     | MAG-1     | V                    | 0.0034                    | 0.0005      | 140                                     | 6                 | 2                 |

| Analysis Date | SRM       | Element <sup>A</sup> | FP-XRF                    |             | Standard reference material information |                   |                   |
|---------------|-----------|----------------------|---------------------------|-------------|-----------------------------------------|-------------------|-------------------|
|               |           |                      | signal (cps) <sup>B</sup> | uncertainty | concentration (ppm)                     | uncertainty (ppm) | flag <sup>C</sup> |
| 6/16/2008     | SCO-1     | V                    | 0.0020                    | 0.0004      | 130                                     | 13                | 2                 |
| 6/16/2008     | SCO-1     | V                    | 0.0022                    | 0.0004      | 130                                     | 13                | 2                 |
| 6/16/2008     | SDO-1     | V                    | 0.0035                    | 0.0005      | 160                                     | 21                | 2                 |
| 6/16/2008     | SDO-1     | V                    | 0.0026                    | 0.0005      | 160                                     | 21                | 2                 |
| 6/16/2008     | NIST-2704 | Cr-LEAP              | 0.0476                    | 0.0032      | 135                                     | 5                 | 2                 |
| 6/16/2008     | BCSS-1    | Cr-LEAP              | 0.0442                    | 0.0028      | 123                                     | 14                | 2                 |
| 6/16/2008     | MESS-1    | Cr-LEAP              | 0.0186                    | 0.0025      | 71                                      | 11                | 2                 |
| 6/16/2008     | MESS-1    | Cr-LEAP              | 0.0173                    | 0.0025      | 71                                      | 11                | 2                 |
| 6/16/2008     | NIST-2704 | Cr-LEAP              | 0.0473                    | 0.0035      | 135                                     | 5                 | 2                 |
| 6/16/2008     | NIST-2709 | Cr-LEAP              | 0.0356                    | 0.0028      | 130                                     | 4                 | 2                 |
| 6/16/2008     | MAG-1     | Cr-LEAP              | 0.0315                    | 0.0035      | 97                                      | 8                 | 2                 |
| 6/16/2008     | NIST-2711 | Cr-LEAP              | 0.0208                    | 0.0025      | 47                                      | 4.7               | 1                 |
| 6/16/2008     | NIST-2711 | Cr-LEAP              | 0.0189                    | 0.0025      | 47                                      | 4.7               | 1                 |
| 6/16/2008     | NIST-2586 | Cr-LEAP              | 0.0902                    | 0.0041      | 301                                     | 45.15             | 2                 |
| 6/16/2008     | MAG-1     | Cr-LEAP              | 0.0315                    | 0.0035      | 97                                      | 8                 | 2                 |
| 6/16/2008     | SCO-1     | Cr-LEAP              | 0.0233                    | 0.0028      | 68                                      | 5                 | 2                 |
| 6/16/2008     | SCO-1     | Cr-LEAP              | 0.0158                    | 0.0028      | 68                                      | 5                 | 2                 |
| 6/16/2008     | SDO-1     | Cr-LEAP              | 0.0262                    | 0.0038      | 66.4                                    | 7.6               | 2                 |
| 6/16/2008     | SDO-1     | Cr-LEAP              | 0.0243                    | 0.0038      | 66.4                                    | 7.6               | 2                 |
| 6/16/2008     | NIST-2704 | Cr                   | 0.0018                    | 0.0004      | 135                                     | 5                 | 2                 |
| 6/16/2008     | MAG-1     | Cr                   | 0.0020                    | 0.0005      | 97                                      | 8                 | 2                 |
| 6/16/2008     | BCSS-1    | Cr                   | 0.0024                    | 0.0004      | 123                                     | 14                | 2                 |
| 6/16/2008     | MESS-1    | Cr                   | 0.0015                    | 0.0004      | 71                                      | 11                | 2                 |
| 6/16/2008     | MESS-1    | Cr                   | 0.0014                    | 0.0004      | 71                                      | 11                | 2                 |
| 6/16/2008     | NIST-2704 | Cr                   | 0.0024                    | 0.0004      | 135                                     | 5                 | 2                 |
| 6/16/2008     | NIST-2709 | Cr                   | 0.0021                    | 0.0004      | 130                                     | 4                 | 2                 |
| 6/16/2008     | NIST-2711 | Cr                   | 0.0012                    | 0.0004      | 47                                      | 4.7               | 1                 |
| 6/16/2008     | NIST-2586 | Cr                   | 0.0049                    | 0.0005      | 301                                     | 45.15             | 2                 |
| 6/16/2008     | SCO-1     | Cr                   | 0.0013                    | 0.0004      | 68                                      | 5                 | 2                 |
| 6/16/2008     | SCO-1     | Cr                   | 0.0018                    | 0.0004      | 68                                      | 5                 | 2                 |
| 6/16/2008     | NIST-2704 | Mn-LEAP              | 0.2102                    | 0.0059      | 555                                     | 19                | 2                 |
| 6/16/2008     | BCSS-1    | Mn-LEAP              | 0.0765                    | 0.0042      | 229                                     | 15                | 2                 |
| 6/16/2008     | MESS-1    | Mn-LEAP              | 0.1542                    | 0.0046      | 513                                     | 25                | 2                 |
| 6/16/2008     | MESS-1    | Mn-LEAP              | 0.1572                    | 0.0046      | 513                                     | 25                | 2                 |
| 6/16/2008     | NIST-2704 | Mn-LEAP              | 0.2140                    | 0.0059      | 555                                     | 19                | 2                 |

| Analysis Date | SRM       | Element <sup>A</sup> | FP-XRF                    |             | Standard reference material information |                   |                   |
|---------------|-----------|----------------------|---------------------------|-------------|-----------------------------------------|-------------------|-------------------|
|               |           |                      | signal (cps) <sup>B</sup> | uncertainty | concentration (ppm)                     | uncertainty (ppm) | flag <sup>C</sup> |
| 6/16/2008     | NIST-2709 | Mn-LEAP              | 0.1994                    | 0.0054      | 538                                     | 17                | 2                 |
| 6/16/2008     | MAG-1     | Mn-LEAP              | 0.2713                    | 0.0063      | 759                                     | 70                | 2                 |
| 6/16/2008     | NIST-2711 | Mn-LEAP              | 0.2219                    | 0.0050      | 638                                     | 28                | 2                 |
| 6/16/2008     | NIST-2711 | Mn-LEAP              | 0.2332                    | 0.0054      | 638                                     | 28                | 2                 |
| 6/16/2008     | NIST-2586 | Mn-LEAP              | 0.3862                    | 0.0075      | 1000                                    | 20                | 1                 |
| 6/16/2008     | MAG-1     | Mn-LEAP              | 0.2905                    | 0.0067      | 759                                     | 70                | 2                 |
| 6/16/2008     | SCO-1     | Mn-LEAP              | 0.1275                    | 0.0046      | 410                                     | 30                | 2                 |
| 6/16/2008     | SCO-1     | Mn-LEAP              | 0.1367                    | 0.0050      | 410                                     | 30                | 2                 |
| 6/16/2008     | SDO-1     | Mn-LEAP              | 0.1116                    | 0.0059      | 325                                     | 39                | 2                 |
| 6/16/2008     | SDO-1     | Mn-LEAP              | 0.1133                    | 0.0063      | 325                                     | 39                | 2                 |
| 6/16/2008     | NIST-2704 | Mn                   | 0.0126                    | 0.0007      | 555                                     | 19                | 2                 |
| 6/16/2008     | BCSS-1    | Mn                   | 0.0052                    | 0.0005      | 229                                     | 15                | 2                 |
| 6/16/2008     | MESS-1    | Mn                   | 0.0091                    | 0.0006      | 513                                     | 25                | 2                 |
| 6/16/2008     | MESS-1    | Mn                   | 0.0109                    | 0.0006      | 513                                     | 25                | 2                 |
| 6/16/2008     | NIST-2704 | Mn                   | 0.0133                    | 0.0007      | 555                                     | 19                | 2                 |
| 6/16/2008     | NIST-2709 | Mn                   | 0.0113                    | 0.0006      | 538                                     | 17                | 2                 |
| 6/16/2008     | MAG-1     | Mn                   | 0.0169                    | 0.0008      | 759                                     | 70                | 2                 |
| 6/16/2008     | NIST-2711 | Mn                   | 0.0138                    | 0.0006      | 638                                     | 28                | 2                 |
| 6/16/2008     | NIST-2711 | Mn                   | 0.0128                    | 0.0006      | 638                                     | 28                | 2                 |
| 6/16/2008     | NIST-2586 | Mn                   | 0.0248                    | 0.0009      | 1000                                    | 20                | 1                 |
| 6/16/2008     | MAG-1     | Mn                   | 0.0179                    | 0.0008      | 759                                     | 70                | 2                 |
| 6/16/2008     | SCO-1     | Mn                   | 0.0085                    | 0.0006      | 410                                     | 30                | 2                 |
| 6/16/2008     | SCO-1     | Mn                   | 0.0087                    | 0.0006      | 410                                     | 30                | 2                 |
| 6/16/2008     | SDO-1     | Mn                   | 0.0082                    | 0.0008      | 325                                     | 39                | 2                 |
| 6/16/2008     | SDO-1     | Mn                   | 0.0085                    | 0.0008      | 325                                     | 39                | 2                 |
| 6/16/2008     | NIST-2704 | Fe-LEAP              | 21.3523                   | 0.1694      | 41100                                   | 1000              | 2                 |
| 6/16/2008     | BCSS-1    | Fe-LEAP              | 17.2234                   | 0.1336      | 32873                                   | 979               | 2                 |
| 6/16/2008     | MESS-1    | Fe-LEAP              | 15.6148                   | 0.1195      | 30495                                   | 1749              | 2                 |
| 6/16/2008     | MESS-1    | Fe-LEAP              | 15.3281                   | 0.1178      | 30495                                   | 1749              | 2                 |
| 6/16/2008     | NIST-2704 | Fe-LEAP              | 21.5011                   | 0.1738      | 41100                                   | 1000              | 2                 |
| 6/16/2008     | NIST-2709 | Fe-LEAP              | 18.3123                   | 0.1428      | 35000                                   | 1100              | 2                 |
| 6/16/2008     | MAG-1     | Fe-LEAP              | 25.4031                   | 0.2026      | 47561                                   | 4197              | 2                 |
| 6/16/2008     | NIST-2711 | Fe-LEAP              | 14.0796                   | 0.1086      | 28900                                   | 600               | 2                 |
| 6/16/2008     | NIST-2711 | Fe-LEAP              | 14.0611                   | 0.1097      | 28900                                   | 600               | 2                 |
| 6/16/2008     | NIST-2586 | Fe-LEAP              | 27.5450                   | 0.2270      | 51610                                   | 1032.2            | 1                 |



| Analysis Date | SRM       | Element <sup>A</sup> | FP-XRF                    |             | Standard reference material information |                   |                   |
|---------------|-----------|----------------------|---------------------------|-------------|-----------------------------------------|-------------------|-------------------|
|               |           |                      | signal (cps) <sup>B</sup> | uncertainty | concentration (ppm)                     | uncertainty (ppm) | flag <sup>C</sup> |
| 6/16/2008     | MAG-1     | Fe-LEAP              | 26.3888                   | 0.2194      | 47561                                   | 4197              | 2                 |
| 6/16/2008     | SCO-1     | Fe-LEAP              | 18.2998                   | 0.1434      | 35881                                   | 1259              | 2                 |
| 6/16/2008     | SCO-1     | Fe-LEAP              | 18.0271                   | 0.1412      | 35881                                   | 1259              | 2                 |
| 6/16/2008     | SDO-1     | Fe-LEAP              | 33.9732                   | 0.2851      | 65327                                   | 1469              | 2                 |
| 6/16/2008     | SDO-1     | Fe-LEAP              | 34.4566                   | 0.2916      | 65327                                   | 1469              | 2                 |
| 6/16/2008     | NIST-2704 | Fe                   | 1.4363                    | 0.0072      | 41100                                   | 1000              | 2                 |
| 6/16/2008     | BCSS-1    | Fe                   | 1.0832                    | 0.0056      | 32873                                   | 979               | 2                 |
| 6/16/2008     | MESS-1    | Fe                   | 1.0089                    | 0.0052      | 30495                                   | 1749              | 2                 |
| 6/16/2008     | MESS-1    | Fe                   | 0.9989                    | 0.0052      | 30495                                   | 1749              | 2                 |
| 6/16/2008     | NIST-2704 | Fe                   | 1.4431                    | 0.0073      | 41100                                   | 1000              | 2                 |
| 6/16/2008     | NIST-2709 | Fe                   | 1.1429                    | 0.0058      | 35000                                   | 1100              | 2                 |
| 6/16/2008     | MAG-1     | Fe                   | 1.7306                    | 0.0086      | 47561                                   | 4197              | 2                 |
| 6/16/2008     | NIST-2711 | Fe                   | 0.9328                    | 0.0051      | 28900                                   | 600               | 2                 |
| 6/16/2008     | NIST-2711 | Fe                   | 0.9313                    | 0.0051      | 28900                                   | 600               | 2                 |
| 6/16/2008     | NIST-2586 | Fe                   | 1.8411                    | 0.0090      | 51610                                   | 1032.2            | 1                 |
| 6/16/2008     | MAG-1     | Fe                   | 1.7120                    | 0.0086      | 47561                                   | 4197              | 2                 |
| 6/16/2008     | SCO-1     | Fe                   | 1.1443                    | 0.0059      | 35881                                   | 1259              | 2                 |
| 6/16/2008     | SCO-1     | Fe                   | 1.1435                    | 0.0059      | 35881                                   | 1259              | 2                 |
| 6/16/2008     | SDO-1     | Fe                   | 2.3172                    | 0.0111      | 65327                                   | 1469              | 2                 |
| 6/16/2008     | SDO-1     | Fe                   | 2.3583                    | 0.0114      | 65327                                   | 1469              | 2                 |
| 6/16/2008     | NIST-2704 | Co                   | 0.0197                    | 0.0020      | 14                                      | 0.6               | 2                 |
| 6/16/2008     | MAG-1     | Co                   | 0.0207                    | 0.0022      | 20                                      | 1.6               | 2                 |
| 6/16/2008     | BCSS-1    | Co                   | 0.0129                    | 0.0016      | 11.4                                    | 2.1               | 2                 |
| 6/16/2008     | MESS-1    | Co                   | 0.0119                    | 0.0016      | 10.8                                    | 1.9               | 2                 |
| 6/16/2008     | MESS-1    | Co                   | 0.0110                    | 0.0016      | 10.8                                    | 1.9               | 2                 |
| 6/16/2008     | NIST-2704 | Co                   | 0.0146                    | 0.0020      | 14                                      | 0.6               | 2                 |
| 6/16/2008     | NIST-2709 | Co                   | 0.0174                    | 0.0017      | 13.4                                    | 0.7               | 2                 |
| 6/16/2008     | NIST-2711 | Co                   | 0.0155                    | 0.0016      | 10                                      | 1                 | 1                 |
| 6/16/2008     | NIST-2711 | Co                   | 0.0126                    | 0.0016      | 10                                      | 1                 | 1                 |
| 6/16/2008     | NIST-2586 | Co                   | 0.0214                    | 0.0023      | 35                                      | 3.5               | 1                 |
| 6/16/2008     | MAG-1     | Co                   | 0.0197                    | 0.0022      | 20                                      | 1.6               | 2                 |
| 6/16/2008     | SCO-1     | Co                   | 0.0179                    | 0.0017      | 11                                      | 0.8               | 2                 |
| 6/16/2008     | SCO-1     | Co                   | 0.0197                    | 0.0017      | 11                                      | 0.8               | 2                 |
| 6/16/2008     | SDO-1     | Co                   | 0.0290                    | 0.0026      | 46.8                                    | 6.3               | 2                 |
| 6/16/2008     | SDO-1     | Co                   | 0.0348                    | 0.0026      | 46.8                                    | 6.3               | 2                 |

| Analysis Date | SRM       | Element <sup>A</sup> | FP-XRF                    |             | Standard reference material information |                   |                   |
|---------------|-----------|----------------------|---------------------------|-------------|-----------------------------------------|-------------------|-------------------|
|               |           |                      | signal (cps) <sup>B</sup> | uncertainty | concentration (ppm)                     | uncertainty (ppm) | flag <sup>C</sup> |
| 6/16/2008     | NIST-2704 | Ni                   | 0.0026                    | 0.0006      | 44.1                                    | 3                 | 2                 |
| 6/16/2008     | MAG-1     | Ni                   | 0.0029                    | 0.0006      | 53                                      | 8                 | 2                 |
| 6/16/2008     | BCSS-1    | Ni                   | 0.0039                    | 0.0006      | 55.3                                    | 3.6               | 2                 |
| 6/16/2008     | MESS-1    | Ni                   | 0.0021                    | 0.0005      | 29.5                                    | 2.7               | 2                 |
| 6/16/2008     | MESS-1    | Ni                   | 0.0026                    | 0.0005      | 29.5                                    | 2.7               | 2                 |
| 6/16/2008     | NIST-2704 | Ni                   | 0.0021                    | 0.0006      | 44.1                                    | 3                 | 2                 |
| 6/16/2008     | NIST-2709 | Ni                   | 0.0044                    | 0.0006      | 88                                      | 5                 | 2                 |
| 6/16/2008     | NIST-2711 | Ni                   | 0.0021                    | 0.0006      | 20.6                                    | 1.1               | 2                 |
| 6/16/2008     | NIST-2586 | Ni                   | 0.0051                    | 0.0007      | 75                                      | 7.5               | 1                 |
| 6/16/2008     | MAG-1     | Ni                   | 0.0044                    | 0.0007      | 53                                      | 8                 | 2                 |
| 6/16/2008     | SCO-1     | Ni                   | 0.0023                    | 0.0006      | 27                                      | 4                 | 2                 |
| 6/16/2008     | SDO-1     | Ni                   | 0.0063                    | 0.0008      | 99.5                                    | 9.9               | 2                 |
| 6/16/2008     | SDO-1     | Ni                   | 0.0058                    | 0.0008      | 99.5                                    | 9.9               | 2                 |
| 6/16/2008     | NIST-2704 | Cu                   | 0.0093                    | 0.0005      | 98.6                                    | 5                 | 2                 |
| 6/16/2008     | MESS-1    | Cu                   | 0.0025                    | 0.0004      | 25.1                                    | 3.8               | 2                 |
| 6/16/2008     | MESS-1    | Cu                   | 0.0024                    | 0.0004      | 25.1                                    | 3.8               | 2                 |
| 6/16/2008     | NIST-2704 | Cu                   | 0.0097                    | 0.0005      | 98.6                                    | 5                 | 2                 |
| 6/16/2008     | NIST-2709 | Cu                   | 0.0027                    | 0.0004      | 34.6                                    | 0.7               | 2                 |
| 6/16/2008     | MAG-1     | Cu                   | 0.0035                    | 0.0005      | 30                                      | 3                 | 2                 |
| 6/16/2008     | NIST-2711 | Cu                   | 0.0103                    | 0.0005      | 114                                     | 2                 | 2                 |
| 6/16/2008     | NIST-2711 | Cu                   | 0.0109                    | 0.0005      | 114                                     | 2                 | 2                 |
| 6/16/2008     | NIST-2586 | Cu                   | 0.0047                    | 0.0005      | 81                                      | 8.1               | 1                 |
| 6/16/2008     | SCO-1     | Cu                   | 0.0013                    | 0.0004      | 29                                      | 2                 | 2                 |
| 6/16/2008     | SCO-1     | Cu                   | 0.0021                    | 0.0004      | 29                                      | 2                 | 2                 |
| 6/16/2008     | SDO-1     | Cu                   | 0.0037                    | 0.0005      | 60.2                                    | 9.6               | 2                 |
| 6/16/2008     | SDO-1     | Cu                   | 0.0042                    | 0.0005      | 60.2                                    | 9.6               | 2                 |
| 6/16/2008     | NIST-2704 | Zn                   | 0.0541                    | 0.0009      | 438                                     | 12                | 2                 |
| 6/16/2008     | BCSS-1    | Zn                   | 0.0141                    | 0.0004      | 119                                     | 12                | 2                 |
| 6/16/2008     | MESS-1    | Zn                   | 0.0238                    | 0.0006      | 191                                     | 17                | 2                 |
| 6/16/2008     | MESS-1    | Zn                   | 0.0237                    | 0.0006      | 191                                     | 17                | 2                 |
| 6/16/2008     | NIST-2704 | Zn                   | 0.0580                    | 0.0010      | 438                                     | 12                | 2                 |
| 6/16/2008     | NIST-2709 | Zn                   | 0.0121                    | 0.0004      | 106                                     | 3                 | 2                 |
| 6/16/2008     | MAG-1     | Zn                   | 0.0162                    | 0.0006      | 130                                     | 6                 | 2                 |
| 6/16/2008     | NIST-2711 | Zn                   | 0.0439                    | 0.0009      | 350.4                                   | 4.8               | 2                 |
| 6/16/2008     | NIST-2711 | Zn                   | 0.0466                    | 0.0009      | 350.4                                   | 4.8               | 2                 |

| Analysis Date | SRM       | Element <sup>A</sup> | FP-XRF                    |             | Standard reference material information |                   |                   |
|---------------|-----------|----------------------|---------------------------|-------------|-----------------------------------------|-------------------|-------------------|
|               |           |                      | signal (cps) <sup>B</sup> | uncertainty | concentration (ppm)                     | uncertainty (ppm) | flag <sup>C</sup> |
| 6/16/2008     | NIST-2586 | Zn                   | 0.0445                    | 0.0009      | 352                                     | 17.6              | 1                 |
| 6/16/2008     | MAG-1     | Zn                   | 0.0166                    | 0.0006      | 130                                     | 6                 | 2                 |
| 6/16/2008     | SCO-1     | Zn                   | 0.0117                    | 0.0004      | 100                                     | 8                 | 2                 |
| 6/16/2008     | SCO-1     | Zn                   | 0.0123                    | 0.0004      | 100                                     | 8                 | 2                 |
| 6/16/2008     | SDO-1     | Zn                   | 0.0070                    | 0.0004      | 64.1                                    | 6.9               | 2                 |
| 6/16/2008     | SDO-1     | Zn                   | 0.0073                    | 0.0004      | 64.1                                    | 6.9               | 2                 |
| 6/16/2008     | NIST-2704 | As                   | 0.0038                    | 0.0011      | 23.4                                    | 0.8               | 2                 |
| 6/16/2008     | MAG-1     | As                   | 0.0029                    | 0.0005      | 9.2                                     | 0.92              | 1                 |
| 6/16/2008     | BCSS-1    | As                   | 0.0032                    | 0.0005      | 11.1                                    | 1.4               | 2                 |
| 6/16/2008     | MESS-1    | As                   | 0.0021                    | 0.0005      | 10.6                                    | 1.2               | 2                 |
| 6/16/2008     | MESS-1    | As                   | 0.0027                    | 0.0005      | 10.6                                    | 1.2               | 2                 |
| 6/16/2008     | NIST-2704 | As                   | 0.0048                    | 0.0011      | 23.4                                    | 0.8               | 2                 |
| 6/16/2008     | NIST-2709 | As                   | 0.0035                    | 0.0005      | 17.7                                    | 0.8               | 2                 |
| 6/16/2008     | NIST-2710 | As                   | 0.1458                    | 0.0062      | 626                                     | 38                | 2                 |
| 6/16/2008     | NIST-2710 | As                   | 0.1359                    | 0.0059      | 626                                     | 38                | 2                 |
| 6/16/2008     | NIST-2711 | As                   | 0.0190                    | 0.0024      | 105                                     | 8                 | 2                 |
| 6/16/2008     | NIST-2711 | As                   | 0.0121                    | 0.0024      | 105                                     | 8                 | 2                 |
| 6/16/2008     | MAG-1     | As                   | 0.0029                    | 0.0005      | 9.2                                     | 0.92              | 1                 |
| 6/16/2008     | SCO-1     | As                   | 0.0024                    | 0.0005      | 12                                      | 1                 | 2                 |
| 6/16/2008     | SCO-1     | As                   | 0.0032                    | 0.0005      | 12                                      | 1                 | 2                 |
| 6/16/2008     | SDO-1     | As                   | 0.0185                    | 0.0008      | 68.5                                    | 8.6               | 2                 |
| 6/16/2008     | SDO-1     | As                   | 0.0196                    | 0.0008      | 68.5                                    | 8.6               | 2                 |
| 6/16/2008     | NIST-2704 | Br                   | 0.0030                    | 0.0004      | 7                                       | 0.7               | 1                 |
| 6/16/2008     | MAG-1     | Br                   | 0.1055                    | 0.0013      | 250                                     | 25                | 1                 |
| 6/16/2008     | NIST-2704 | Br                   | 0.0030                    | 0.0004      | 7                                       | 0.7               | 1                 |
| 6/16/2008     | NIST-2710 | Br                   | 0.0043                    | 0.0013      | 6                                       | 0.6               | 1                 |
| 6/16/2008     | NIST-2710 | Br                   | 0.0052                    | 0.0013      | 6                                       | 0.6               | 1                 |
| 6/16/2008     | NIST-2711 | Br                   | 0.0030                    | 0.0004      | 5                                       | 0.5               | 1                 |
| 6/16/2008     | NIST-2711 | Br                   | 0.0035                    | 0.0004      | 5                                       | 0.5               | 1                 |
| 6/16/2008     | MAG-1     | Br                   | 0.1068                    | 0.0013      | 250                                     | 25                | 1                 |
| 6/16/2008     | NIST-2704 | Rb                   | 0.0643                    | 0.0014      | 100                                     | 10                | 1                 |
| 6/16/2008     | MAG-1     | Rb                   | 0.0953                    | 0.0014      | 150                                     | 6                 | 2                 |
| 6/16/2008     | NIST-2704 | Rb                   | 0.0650                    | 0.0014      | 100                                     | 10                | 1                 |
| 6/16/2008     | NIST-2709 | Rb                   | 0.0565                    | 0.0014      | 96                                      | 9.6               | 1                 |
| 6/16/2008     | NIST-2710 | Rb                   | 0.0826                    | 0.0021      | 120                                     | 12                | 1                 |

| Analysis Date | SRM       | Element <sup>A</sup> | FP-XRF                    |             | Standard reference material information |                   |                   |
|---------------|-----------|----------------------|---------------------------|-------------|-----------------------------------------|-------------------|-------------------|
|               |           |                      | signal (cps) <sup>B</sup> | uncertainty | concentration (ppm)                     | uncertainty (ppm) | flag <sup>C</sup> |
| 6/16/2008     | NIST-2710 | Rb                   | 0.0770                    | 0.0021      | 120                                     | 12                | 1                 |
| 6/16/2008     | NIST-2711 | Rb                   | 0.0713                    | 0.0014      | 110                                     | 11                | 1                 |
| 6/16/2008     | NIST-2711 | Rb                   | 0.0713                    | 0.0014      | 110                                     | 11                | 1                 |
| 6/16/2008     | MAG-1     | Rb                   | 0.0904                    | 0.0014      | 150                                     | 6                 | 2                 |
| 6/16/2008     | SCO-1     | Rb                   | 0.0685                    | 0.0014      | 110                                     | 4                 | 2                 |
| 6/16/2008     | SCO-1     | Rb                   | 0.0678                    | 0.0014      | 110                                     | 4                 | 2                 |
| 6/16/2008     | SDO-1     | Rb                   | 0.0755                    | 0.0014      | 126                                     | 3.9               | 2                 |
| 6/16/2008     | SDO-1     | Rb                   | 0.0777                    | 0.0014      | 126                                     | 3.9               | 2                 |
| 6/16/2008     | NIST-2704 | Sr                   | 0.0987                    | 0.0016      | 130                                     | 13                | 1                 |
| 6/16/2008     | MAG-1     | Sr                   | 0.1050                    | 0.0016      | 150                                     | 15                | 2                 |
| 6/16/2008     | BCSS-1    | Sr                   | 0.0744                    | 0.0008      | 96                                      | 9.6               | 1                 |
| 6/16/2008     | MESS-1    | Sr                   | 0.0682                    | 0.0008      | 89                                      | 8.9               | 1                 |
| 6/16/2008     | MESS-1    | Sr                   | 0.0674                    | 0.0008      | 89                                      | 8.9               | 1                 |
| 6/16/2008     | NIST-2704 | Sr                   | 0.1003                    | 0.0016      | 130                                     | 13                | 1                 |
| 6/16/2008     | NIST-2709 | Sr                   | 0.1685                    | 0.0016      | 231                                     | 2                 | 2                 |
| 6/16/2008     | NIST-2710 | Sr                   | 0.2500                    | 0.0024      | 330                                     | 33                | 1                 |
| 6/16/2008     | NIST-2710 | Sr                   | 0.2523                    | 0.0024      | 330                                     | 33                | 1                 |
| 6/16/2008     | NIST-2711 | Sr                   | 0.1849                    | 0.0016      | 245.3                                   | 0.7               | 2                 |
| 6/16/2008     | NIST-2711 | Sr                   | 0.1818                    | 0.0016      | 245.3                                   | 0.7               | 2                 |
| 6/16/2008     | NIST-2586 | Sr                   | 0.0603                    | 0.0008      | 84.1                                    | 8.41              | 1                 |
| 6/16/2008     | MAG-1     | Sr                   | 0.1050                    | 0.0016      | 150                                     | 15                | 2                 |
| 6/16/2008     | SCO-1     | Sr                   | 0.1222                    | 0.0016      | 170                                     | 16                | 2                 |
| 6/16/2008     | SCO-1     | Sr                   | 0.1262                    | 0.0016      | 170                                     | 16                | 2                 |
| 6/16/2008     | SDO-1     | Sr                   | 0.0541                    | 0.0008      | 75.1                                    | 11                | 2                 |
| 6/16/2008     | SDO-1     | Sr                   | 0.0556                    | 0.0008      | 75.1                                    | 11                | 2                 |
| 6/16/2008     | NIST-2704 | Zr                   | 0.3261                    | 0.0023      | 300                                     | 30                | 1                 |
| 6/16/2008     | MAG-1     | Zr                   | 0.1274                    | 0.0023      | 130                                     | 13                | 2                 |
| 6/16/2008     | NIST-2704 | Zr                   | 0.3121                    | 0.0023      | 300                                     | 30                | 1                 |
| 6/16/2008     | NIST-2709 | Zr                   | 0.1461                    | 0.0023      | 160                                     | 16                | 1                 |
| 6/16/2008     | NIST-2711 | Zr                   | 0.2759                    | 0.0023      | 230                                     | 23                | 1                 |
| 6/16/2008     | NIST-2711 | Zr                   | 0.2724                    | 0.0023      | 230                                     | 23                | 1                 |
| 6/16/2008     | MAG-1     | Zr                   | 0.1297                    | 0.0023      | 130                                     | 13                | 2                 |
| 6/16/2008     | SCO-1     | Zr                   | 0.1800                    | 0.0023      | 160                                     | 30                | 2                 |
| 6/16/2008     | SCO-1     | Zr                   | 0.1718                    | 0.0023      | 160                                     | 30                | 2                 |
| 6/16/2008     | SDO-1     | Zr                   | 0.1601                    | 0.0023      | 165                                     | 24                | 2                 |

| Analysis Date | SRM       | Element <sup>A</sup> | FP-XRF                    |             | Standard reference material information |                   |                   |
|---------------|-----------|----------------------|---------------------------|-------------|-----------------------------------------|-------------------|-------------------|
|               |           |                      | signal (cps) <sup>B</sup> | uncertainty | concentration (ppm)                     | uncertainty (ppm) | flag <sup>C</sup> |
| 6/16/2008     | SDO-1     | Zr                   | 0.1566                    | 0.0023      | 165                                     | 24                | 2                 |
| 6/16/2008     | NIST-2704 | I-LEAP               | 0.0357                    | 0.0060      | 2                                       | 0.2               | 1                 |
| 6/16/2008     | MAG-1     | I-LEAP               | 0.0343                    | 0.0052      | 380                                     | 38                | 1                 |
| 6/16/2008     | NIST-2704 | I-LEAP               | 0.0363                    | 0.0061      | 2                                       | 0.2               | 1                 |
| 6/16/2008     | NIST-2709 | I-LEAP               | 0.0204                    | 0.0050      | 5                                       | 0.5               | 1                 |
| 6/16/2008     | NIST-2711 | I-LEAP               | 0.0311                    | 0.0053      | 3                                       | 0.3               | 1                 |
| 6/16/2008     | NIST-2711 | I-LEAP               | 0.0331                    | 0.0053      | 3                                       | 0.3               | 1                 |
| 6/16/2008     | MAG-1     | I-LEAP               | 0.0415                    | 0.0054      | 380                                     | 38                | 1                 |
| 6/16/2008     | NIST-2704 | Ba                   | 0.0743                    | 0.0048      | 414                                     | 12                | 2                 |
| 6/16/2008     | MAG-1     | Ba                   | 0.0900                    | 0.0052      | 480                                     | 41                | 2                 |
| 6/16/2008     | NIST-2704 | Ba                   | 0.0760                    | 0.0050      | 414                                     | 12                | 2                 |
| 6/16/2008     | NIST-2709 | Ba                   | 0.0841                    | 0.0044      | 968                                     | 40                | 2                 |
| 6/16/2008     | NIST-2710 | Ba                   | 0.0812                    | 0.0050      | 707                                     | 51                | 2                 |
| 6/16/2008     | NIST-2710 | Ba                   | 0.0856                    | 0.0050      | 707                                     | 51                | 2                 |
| 6/16/2008     | NIST-2711 | Ba                   | 0.0689                    | 0.0040      | 726                                     | 38                | 2                 |
| 6/16/2008     | NIST-2711 | Ba                   | 0.0609                    | 0.0038      | 726                                     | 38                | 2                 |
| 6/16/2008     | NIST-2586 | Ba                   | 0.0908                    | 0.0057      | 413                                     | 16.52             | 1                 |
| 6/16/2008     | MAG-1     | Ba                   | 0.0867                    | 0.0052      | 480                                     | 41                | 2                 |
| 6/16/2008     | SCO-1     | Ba                   | 0.0812                    | 0.0044      | 570                                     | 30                | 2                 |
| 6/16/2008     | SCO-1     | Ba                   | 0.0865                    | 0.0044      | 570                                     | 30                | 2                 |
| 6/16/2008     | SDO-1     | Ba                   | 0.0869                    | 0.0056      | 397                                     | 38                | 2                 |
| 6/16/2008     | SDO-1     | Ba                   | 0.0988                    | 0.0057      | 397                                     | 38                | 2                 |
| 6/16/2008     | NIST-2704 | Hg                   | 0.0012                    | 0.0003      | 1.44                                    | 0.07              | 2                 |
| 6/16/2008     | MAG-1     | Hg                   | 0.0008                    | 0.0003      | 0.02                                    | 0.002             | 1                 |
| 6/16/2008     | NIST-2704 | Hg                   | 0.0013                    | 0.0003      | 1.44                                    | 0.07              | 2                 |
| 6/16/2008     | NIST-2710 | Hg                   | 0.0130                    | 0.0008      | 32.6                                    | 1.8               | 2                 |
| 6/16/2008     | NIST-2710 | Hg                   | 0.0133                    | 0.0008      | 32.6                                    | 1.8               | 2                 |
| 6/16/2008     | NIST-2711 | Hg                   | 0.0030                    | 0.0004      | 6.25                                    | 0.19              | 2                 |
| 6/16/2008     | NIST-2711 | Hg                   | 0.0024                    | 0.0004      | 6.25                                    | 0.19              | 2                 |
| 6/16/2008     | NIST-2586 | Hg                   | 0.0013                    | 0.0003      | 0.37                                    | 0.04              | 1                 |
| 6/16/2008     | MAG-1     | Hg                   | 0.0008                    | 0.0003      | 0.02                                    | 0.002             | 1                 |
| 6/16/2008     | SDO-1     | Hg                   | 0.0009                    | 0.0003      | 0.19                                    | 0.08              | 2                 |
| 6/16/2008     | SDO-1     | Hg                   | 0.0009                    | 0.0003      | 0.19                                    | 0.08              | 2                 |
| 6/16/2008     | NIST-2704 | Pb                   | 0.0311                    | 0.0009      | 161                                     | 17                | 2                 |
| 6/16/2008     | BCSS-1    | Pb                   | 0.0037                    | 0.0004      | 22.7                                    | 3.4               | 2                 |

| Analysis Date | SRM       | Element <sup>A</sup> | FP-XRF                    |             | Standard reference material information |                   |                   |
|---------------|-----------|----------------------|---------------------------|-------------|-----------------------------------------|-------------------|-------------------|
|               |           |                      | signal (cps) <sup>B</sup> | uncertainty | concentration (ppm)                     | uncertainty (ppm) | flag <sup>C</sup> |
| 6/16/2008     | MESS-1    | Pb                   | 0.0060                    | 0.0004      | 34                                      | 6.1               | 2                 |
| 6/16/2008     | MESS-1    | Pb                   | 0.0060                    | 0.0004      | 34                                      | 6.1               | 2                 |
| 6/16/2008     | NIST-2704 | Pb                   | 0.0302                    | 0.0009      | 161                                     | 17                | 2                 |
| 6/16/2008     | NIST-2709 | Pb                   | 0.0037                    | 0.0004      | 18.9                                    | 0.5               | 2                 |
| 6/16/2008     | MAG-1     | Pb                   | 0.0043                    | 0.0004      | 24                                      | 3                 | 2                 |
| 6/16/2008     | NIST-2711 | Pb                   | 0.2317                    | 0.0019      | 1162                                    | 31                | 2                 |
| 6/16/2008     | NIST-2711 | Pb                   | 0.2368                    | 0.0022      | 1162                                    | 31                | 2                 |
| 6/16/2008     | NIST-2586 | Pb                   | 0.0848                    | 0.0013      | 432                                     | 17.28             | 2                 |
| 6/16/2008     | MAG-1     | Pb                   | 0.0039                    | 0.0004      | 24                                      | 3                 | 2                 |
| 6/16/2008     | SCO-1     | Pb                   | 0.0058                    | 0.0004      | 31                                      | 3                 | 2                 |
| 6/16/2008     | SCO-1     | Pb                   | 0.0047                    | 0.0004      | 31                                      | 3                 | 2                 |
| 6/16/2008     | SDO-1     | Pb                   | 0.0050                    | 0.0004      | 27.9                                    | 5.2               | 2                 |
| 6/16/2008     | SDO-1     | Pb                   | 0.0047                    | 0.0004      | 27.9                                    | 5.2               | 2                 |
| 6/16/2008     | NIST-2704 | U                    | 0.0045                    | 0.0008      | 3.13                                    | 0.13              | 2                 |
| 6/16/2008     | MAG-1     | U                    | 0.0045                    | 0.0008      | 2.7                                     | 0.3               | 2                 |
| 6/16/2008     | NIST-2704 | U                    | 0.0042                    | 0.0008      | 3.13                                    | 0.13              | 2                 |
| 6/16/2008     | NIST-2709 | U                    | 0.0047                    | 0.0008      | 3                                       | 0.3               | 1                 |
| 6/16/2008     | NIST-2710 | U                    | 0.0129                    | 0.0011      | 25                                      | 2.5               | 1                 |
| 6/16/2008     | NIST-2710 | U                    | 0.0142                    | 0.0011      | 25                                      | 2.5               | 1                 |
| 6/16/2008     | NIST-2711 | U                    | 0.0058                    | 0.0008      | 2.6                                     | 0.26              | 1                 |
| 6/16/2008     | NIST-2711 | U                    | 0.0055                    | 0.0008      | 2.6                                     | 0.26              | 1                 |
| 6/16/2008     | MAG-1     | U                    | 0.0053                    | 0.0008      | 2.7                                     | 0.3               | 2                 |
| 6/16/2008     | SDO-1     | U                    | 0.0150                    | 0.0011      | 48.8                                    | 6.5               | 2                 |
| 6/16/2008     | SDO-1     | U                    | 0.0166                    | 0.0011      | 48.8                                    | 6.5               | 2                 |
| 6/18/2008     | MESS-1    | S-LEAP               | 0.0071                    | 0.0016      | 7200                                    | 500               | 2                 |
| 6/18/2008     | NIST-2710 | S-LEAP               | 0.0084                    | 0.0020      | 2400                                    | 60                | 2                 |
| 6/18/2008     | BCSS-1    | S-LEAP               | 0.0052                    | 0.0016      | 3600                                    | 500               | 2                 |
| 6/18/2008     | SDO-1     | S-LEAP               | 0.0379                    | 0.0026      | 53500                                   | 4400              | 2                 |
| 6/18/2008     | MESS-1    | CI-LEAP              | 0.0416                    | 0.0025      | 8200                                    | 700               | 2                 |
| 6/18/2008     | MAG-1     | CI-LEAP              | 0.1011                    | 0.0036      | 31000                                   | 600               | 2                 |
| 6/18/2008     | BCSS-1    | CI-LEAP              | 0.0441                    | 0.0025      | 11200                                   | 500               | 2                 |
| 6/18/2008     | BCSS-1    | CI-LEAP              | 0.0421                    | 0.0025      | 11200                                   | 500               | 2                 |
| 6/18/2008     | MESS-1    | K-LEAP               | 0.2954                    | 0.0048      | 18595                                   | 332               | 2                 |
| 6/18/2008     | NIST-2704 | K-LEAP               | 0.3723                    | 0.0058      | 20000                                   | 400               | 2                 |
| 6/18/2008     | NIST-2710 | K-LEAP               | 0.3658                    | 0.0061      | 21100                                   | 1100              | 2                 |

| Analysis Date | SRM       | Element <sup>A</sup> | FP-XRF                    |             | Standard reference material information |                   |                   |
|---------------|-----------|----------------------|---------------------------|-------------|-----------------------------------------|-------------------|-------------------|
|               |           |                      | signal (cps) <sup>B</sup> | uncertainty | concentration (ppm)                     | uncertainty (ppm) | flag <sup>C</sup> |
| 6/18/2008     | MAG-1     | K-LEAP               | 0.4911                    | 0.0070      | 29470                                   | 1411              | 2                 |
| 6/18/2008     | BCSS-1    | K-LEAP               | 0.2832                    | 0.0047      | 18014                                   | 332               | 2                 |
| 6/18/2008     | BCSS-1    | K-LEAP               | 0.2880                    | 0.0047      | 18014                                   | 332               | 2                 |
| 6/18/2008     | NIST-2709 | K-LEAP               | 0.3046                    | 0.0047      | 20300                                   | 600               | 2                 |
| 6/18/2008     | NIST-2709 | K-LEAP               | 0.3115                    | 0.0051      | 20300                                   | 600               | 2                 |
| 6/18/2008     | NIST-2711 | K-LEAP               | 0.3923                    | 0.0056      | 24500                                   | 800               | 2                 |
| 6/18/2008     | NIST-2711 | K-LEAP               | 0.3894                    | 0.0057      | 24500                                   | 800               | 2                 |
| 6/18/2008     | NIST-2586 | K-LEAP               | 0.1826                    | 0.0043      | 9760                                    | 195.2             | 1                 |
| 6/18/2008     | NIST-2586 | K-LEAP               | 0.1756                    | 0.0043      | 9760                                    | 195.2             | 1                 |
| 6/18/2008     | SCO-1     | K-LEAP               | 0.3522                    | 0.0054      | 22995                                   | 664               | 2                 |
| 6/18/2008     | SCO-1     | K-LEAP               | 0.3555                    | 0.0055      | 22995                                   | 664               | 2                 |
| 6/18/2008     | SDO-1     | K-LEAP               | 0.5129                    | 0.0074      | 27810                                   | 506               | 2                 |
| 6/18/2008     | MESS-1    | Ca-LEAP              | 0.1426                    | 0.0041      | 4817                                    | 457               | 2                 |
| 6/18/2008     | NIST-2704 | Ca-LEAP              | 0.9493                    | 0.0110      | 26000                                   | 300               | 2                 |
| 6/18/2008     | NIST-2710 | Ca-LEAP              | 0.4321                    | 0.0073      | 12500                                   | 300               | 2                 |
| 6/18/2008     | MAG-1     | Ca-LEAP              | 0.3202                    | 0.0062      | 9791                                    | 715               | 2                 |
| 6/18/2008     | BCSS-1    | Ca-LEAP              | 0.1857                    | 0.0044      | 5432                                    | 529               | 2                 |
| 6/18/2008     | BCSS-1    | Ca-LEAP              | 0.1927                    | 0.0045      | 5432                                    | 529               | 2                 |
| 6/18/2008     | NIST-2709 | Ca-LEAP              | 0.6324                    | 0.0078      | 18900                                   | 500               | 2                 |
| 6/18/2008     | NIST-2709 | Ca-LEAP              | 0.6360                    | 0.0082      | 18900                                   | 500               | 2                 |
| 6/18/2008     | NIST-2711 | Ca-LEAP              | 0.9793                    | 0.0107      | 28800                                   | 800               | 2                 |
| 6/18/2008     | NIST-2711 | Ca-LEAP              | 0.9764                    | 0.0108      | 28800                                   | 800               | 2                 |
| 6/18/2008     | NIST-2586 | Ca-LEAP              | 0.7260                    | 0.0094      | 22180                                   | 443.6             | 1                 |
| 6/18/2008     | NIST-2586 | Ca-LEAP              | 0.7523                    | 0.0098      | 22180                                   | 443.6             | 1                 |
| 6/18/2008     | SCO-1     | Ca-LEAP              | 0.6633                    | 0.0084      | 18725                                   | 1429              | 2                 |
| 6/18/2008     | SCO-1     | Ca-LEAP              | 0.6698                    | 0.0085      | 18725                                   | 1429              | 2                 |
| 6/18/2008     | SDO-1     | Ca-LEAP              | 0.2694                    | 0.0061      | 7504                                    | 336               | 2                 |
| 6/18/2008     | MESS-1    | Ti-LEAP              | 0.4339                    | 0.0092      | 5425                                    | 168               | 2                 |
| 6/18/2008     | NIST-2704 | Ti-LEAP              | 0.4035                    | 0.0097      | 4570                                    | 180               | 2                 |
| 6/18/2008     | NIST-2710 | Ti-LEAP              | 0.2594                    | 0.0092      | 2830                                    | 100               | 2                 |
| 6/18/2008     | MAG-1     | Ti-LEAP              | 0.3618                    | 0.0099      | 4496                                    | 420               | 2                 |
| 6/18/2008     | BCSS-1    | Ti-LEAP              | 0.3759                    | 0.0086      | 4400                                    | 144               | 2                 |
| 6/18/2008     | BCSS-1    | Ti-LEAP              | 0.3601                    | 0.0085      | 4400                                    | 144               | 2                 |
| 6/18/2008     | NIST-2709 | Ti-LEAP              | 0.2703                    | 0.0081      | 3420                                    | 240               | 2                 |
| 6/18/2008     | NIST-2709 | Ti-LEAP              | 0.2650                    | 0.0083      | 3420                                    | 240               | 2                 |

| Analysis Date | SRM       | Element <sup>A</sup> | FP-XRF                    |             | Standard reference material information |                   |                   |
|---------------|-----------|----------------------|---------------------------|-------------|-----------------------------------------|-------------------|-------------------|
|               |           |                      | signal (cps) <sup>B</sup> | uncertainty | concentration (ppm)                     | uncertainty (ppm) | flag <sup>C</sup> |
| 6/18/2008     | NIST-2711 | Ti-LEAP              | 0.2262                    | 0.0074      | 3060                                    | 230               | 2                 |
| 6/18/2008     | NIST-2711 | Ti-LEAP              | 0.2544                    | 0.0076      | 3060                                    | 230               | 2                 |
| 6/18/2008     | NIST-2586 | Ti-LEAP              | 0.5815                    | 0.0118      | 6050                                    | 665.5             | 1                 |
| 6/18/2008     | NIST-2586 | Ti-LEAP              | 0.5979                    | 0.0123      | 6050                                    | 665.5             | 1                 |
| 6/18/2008     | SCO-1     | Ti-LEAP              | 0.2774                    | 0.0083      | 3776                                    | 360               | 2                 |
| 6/18/2008     | SCO-1     | Ti-LEAP              | 0.2800                    | 0.0083      | 3776                                    | 360               | 2                 |
| 6/18/2008     | SDO-1     | Ti-LEAP              | 0.3995                    | 0.0109      | 4256                                    | 186               | 2                 |
| 6/18/2008     | MESS-1    | Ti                   | 0.0252                    | 0.0007      | 5425                                    | 168               | 2                 |
| 6/18/2008     | NIST-2704 | Ti                   | 0.0239                    | 0.0007      | 4570                                    | 180               | 2                 |
| 6/18/2008     | BCSS-1    | Ti                   | 0.0196                    | 0.0006      | 4400                                    | 144               | 2                 |
| 6/18/2008     | BCSS-1    | Ti                   | 0.0216                    | 0.0007      | 4400                                    | 144               | 2                 |
| 6/18/2008     | NIST-2709 | Ti                   | 0.0169                    | 0.0006      | 3420                                    | 240               | 2                 |
| 6/18/2008     | NIST-2709 | Ti                   | 0.0171                    | 0.0006      | 3420                                    | 240               | 2                 |
| 6/18/2008     | MAG-1     | Ti                   | 0.0240                    | 0.0008      | 4496                                    | 420               | 2                 |
| 6/18/2008     | NIST-2711 | Ti                   | 0.0151                    | 0.0006      | 3060                                    | 230               | 2                 |
| 6/18/2008     | NIST-2711 | Ti                   | 0.0155                    | 0.0006      | 3060                                    | 230               | 2                 |
| 6/18/2008     | NIST-2586 | Ti                   | 0.0357                    | 0.0009      | 6050                                    | 665.5             | 1                 |
| 6/18/2008     | NIST-2586 | Ti                   | 0.0343                    | 0.0009      | 6050                                    | 665.5             | 1                 |
| 6/18/2008     | SCO-1     | Ti                   | 0.0173                    | 0.0006      | 3776                                    | 360               | 2                 |
| 6/18/2008     | SCO-1     | Ti                   | 0.0163                    | 0.0006      | 3776                                    | 360               | 2                 |
| 6/18/2008     | SDO-1     | Ti                   | 0.0223                    | 0.0008      | 4256                                    | 186               | 2                 |
| 6/18/2008     | MESS-1    | V                    | 0.0024                    | 0.0004      | 72.4                                    | 17                | 2                 |
| 6/18/2008     | NIST-2704 | V                    | 0.0014                    | 0.0004      | 95                                      | 4                 | 2                 |
| 6/18/2008     | NIST-2710 | V                    | 0.0031                    | 0.0005      | 76.6                                    | 2.3               | 2                 |
| 6/18/2008     | MAG-1     | V                    | 0.0031                    | 0.0005      | 140                                     | 6                 | 2                 |
| 6/18/2008     | BCSS-1    | V                    | 0.0018                    | 0.0004      | 93.4                                    | 4.9               | 2                 |
| 6/18/2008     | BCSS-1    | V                    | 0.0017                    | 0.0004      | 93.4                                    | 4.9               | 2                 |
| 6/18/2008     | NIST-2709 | V                    | 0.0024                    | 0.0004      | 112                                     | 5                 | 2                 |
| 6/18/2008     | NIST-2709 | V                    | 0.0025                    | 0.0004      | 112                                     | 5                 | 2                 |
| 6/18/2008     | NIST-2711 | V                    | 0.0027                    | 0.0004      | 81.6                                    | 2.9               | 2                 |
| 6/18/2008     | NIST-2711 | V                    | 0.0020                    | 0.0004      | 81.6                                    | 2.9               | 2                 |
| 6/18/2008     | NIST-2586 | V                    | 0.0020                    | 0.0005      | 160                                     | 16                | 1                 |
| 6/18/2008     | NIST-2586 | V                    | 0.0033                    | 0.0005      | 160                                     | 16                | 1                 |
| 6/18/2008     | SCO-1     | V                    | 0.0019                    | 0.0004      | 130                                     | 13                | 2                 |
| 6/18/2008     | SCO-1     | V                    | 0.0024                    | 0.0004      | 130                                     | 13                | 2                 |



| Analysis Date | SRM       | Element <sup>A</sup> | FP-XRF                    |             | Standard reference material information |                   |                   |
|---------------|-----------|----------------------|---------------------------|-------------|-----------------------------------------|-------------------|-------------------|
|               |           |                      | signal (cps) <sup>B</sup> | uncertainty | concentration (ppm)                     | uncertainty (ppm) | flag <sup>C</sup> |
| 6/18/2008     | SDO-1     | V                    | 0.0033                    | 0.0005      | 160                                     | 21                | 2                 |
| 6/18/2008     | MESS-1    | Cr-LEAP              | 0.0246                    | 0.0028      | 71                                      | 11                | 2                 |
| 6/18/2008     | NIST-2704 | Cr-LEAP              | 0.0397                    | 0.0032      | 135                                     | 5                 | 2                 |
| 6/18/2008     | BCSS-1    | Cr-LEAP              | 0.0331                    | 0.0028      | 123                                     | 14                | 2                 |
| 6/18/2008     | BCSS-1    | Cr-LEAP              | 0.0404                    | 0.0028      | 123                                     | 14                | 2                 |
| 6/18/2008     | NIST-2709 | Cr-LEAP              | 0.0385                    | 0.0028      | 130                                     | 4                 | 2                 |
| 6/18/2008     | NIST-2709 | Cr-LEAP              | 0.0356                    | 0.0028      | 130                                     | 4                 | 2                 |
| 6/18/2008     | MAG-1     | Cr-LEAP              | 0.0369                    | 0.0035      | 97                                      | 8                 | 2                 |
| 6/18/2008     | NIST-2711 | Cr-LEAP              | 0.0186                    | 0.0025      | 47                                      | 4.7               | 1                 |
| 6/18/2008     | NIST-2711 | Cr-LEAP              | 0.0173                    | 0.0025      | 47                                      | 4.7               | 1                 |
| 6/18/2008     | NIST-2586 | Cr-LEAP              | 0.0896                    | 0.0041      | 301                                     | 45.15             | 2                 |
| 6/18/2008     | NIST-2586 | Cr-LEAP              | 0.0886                    | 0.0041      | 301                                     | 45.15             | 2                 |
| 6/18/2008     | SCO-1     | Cr-LEAP              | 0.0230                    | 0.0028      | 68                                      | 5                 | 2                 |
| 6/18/2008     | SCO-1     | Cr-LEAP              | 0.0221                    | 0.0028      | 68                                      | 5                 | 2                 |
| 6/18/2008     | SDO-1     | Cr-LEAP              | 0.0211                    | 0.0038      | 66.4                                    | 7.6               | 2                 |
| 6/18/2008     | MESS-1    | Cr                   | 0.0012                    | 0.0004      | 71                                      | 11                | 2                 |
| 6/18/2008     | NIST-2704 | Cr                   | 0.0027                    | 0.0004      | 135                                     | 5                 | 2                 |
| 6/18/2008     | MAG-1     | Cr                   | 0.0019                    | 0.0005      | 97                                      | 8                 | 2                 |
| 6/18/2008     | BCSS-1    | Cr                   | 0.0022                    | 0.0004      | 123                                     | 14                | 2                 |
| 6/18/2008     | BCSS-1    | Cr                   | 0.0032                    | 0.0004      | 123                                     | 14                | 2                 |
| 6/18/2008     | NIST-2709 | Cr                   | 0.0020                    | 0.0004      | 130                                     | 4                 | 2                 |
| 6/18/2008     | NIST-2709 | Cr                   | 0.0019                    | 0.0004      | 130                                     | 4                 | 2                 |
| 6/18/2008     | NIST-2711 | Cr                   | 0.0017                    | 0.0004      | 47                                      | 4.7               | 1                 |
| 6/18/2008     | NIST-2586 | Cr                   | 0.0054                    | 0.0005      | 301                                     | 45.15             | 2                 |
| 6/18/2008     | NIST-2586 | Cr                   | 0.0047                    | 0.0005      | 301                                     | 45.15             | 2                 |
| 6/18/2008     | SCO-1     | Cr                   | 0.0013                    | 0.0004      | 68                                      | 5                 | 2                 |
| 6/18/2008     | MESS-1    | Mn-LEAP              | 0.1835                    | 0.0050      | 513                                     | 25                | 2                 |
| 6/18/2008     | NIST-2704 | Mn-LEAP              | 0.2382                    | 0.0059      | 555                                     | 19                | 2                 |
| 6/18/2008     | BCSS-1    | Mn-LEAP              | 0.1032                    | 0.0046      | 229                                     | 15                | 2                 |
| 6/18/2008     | BCSS-1    | Mn-LEAP              | 0.0844                    | 0.0042      | 229                                     | 15                | 2                 |
| 6/18/2008     | NIST-2709 | Mn-LEAP              | 0.2169                    | 0.0050      | 538                                     | 17                | 2                 |
| 6/18/2008     | NIST-2709 | Mn-LEAP              | 0.2232                    | 0.0054      | 538                                     | 17                | 2                 |
| 6/18/2008     | MAG-1     | Mn-LEAP              | 0.3210                    | 0.0067      | 759                                     | 70                | 2                 |
| 6/18/2008     | NIST-2711 | Mn-LEAP              | 0.2324                    | 0.0050      | 638                                     | 28                | 2                 |
| 6/18/2008     | NIST-2711 | Mn-LEAP              | 0.2420                    | 0.0054      | 638                                     | 28                | 2                 |

| Analysis Date | SRM       | Element <sup>A</sup> | FP-XRF                    |             | Standard reference material information |                   |                   |
|---------------|-----------|----------------------|---------------------------|-------------|-----------------------------------------|-------------------|-------------------|
|               |           |                      | signal (cps) <sup>B</sup> | uncertainty | concentration (ppm)                     | uncertainty (ppm) | flag <sup>C</sup> |
| 6/18/2008     | NIST-2586 | Mn-LEAP              | 0.4389                    | 0.0079      | 1000                                    | 20                | 1                 |
| 6/18/2008     | NIST-2586 | Mn-LEAP              | 0.4092                    | 0.0075      | 1000                                    | 20                | 1                 |
| 6/18/2008     | SCO-1     | Mn-LEAP              | 0.1555                    | 0.0050      | 410                                     | 30                | 2                 |
| 6/18/2008     | SCO-1     | Mn-LEAP              | 0.1492                    | 0.0050      | 410                                     | 30                | 2                 |
| 6/18/2008     | SDO-1     | Mn-LEAP              | 0.1513                    | 0.0063      | 325                                     | 39                | 2                 |
| 6/18/2008     | MESS-1    | Mn                   | 0.0113                    | 0.0006      | 513                                     | 25                | 2                 |
| 6/18/2008     | NIST-2704 | Mn                   | 0.0154                    | 0.0007      | 555                                     | 19                | 2                 |
| 6/18/2008     | BCSS-1    | Mn                   | 0.0076                    | 0.0006      | 229                                     | 15                | 2                 |
| 6/18/2008     | BCSS-1    | Mn                   | 0.0063                    | 0.0006      | 229                                     | 15                | 2                 |
| 6/18/2008     | NIST-2709 | Mn                   | 0.0147                    | 0.0006      | 538                                     | 17                | 2                 |
| 6/18/2008     | NIST-2709 | Mn                   | 0.0138                    | 0.0006      | 538                                     | 17                | 2                 |
| 6/18/2008     | MAG-1     | Mn                   | 0.0210                    | 0.0008      | 759                                     | 70                | 2                 |
| 6/18/2008     | NIST-2711 | Mn                   | 0.0147                    | 0.0006      | 638                                     | 28                | 2                 |
| 6/18/2008     | NIST-2711 | Mn                   | 0.0146                    | 0.0006      | 638                                     | 28                | 2                 |
| 6/18/2008     | NIST-2586 | Mn                   | 0.0274                    | 0.0009      | 1000                                    | 20                | 1                 |
| 6/18/2008     | NIST-2586 | Mn                   | 0.0248                    | 0.0009      | 1000                                    | 20                | 1                 |
| 6/18/2008     | SCO-1     | Mn                   | 0.0105                    | 0.0006      | 410                                     | 30                | 2                 |
| 6/18/2008     | SCO-1     | Mn                   | 0.0096                    | 0.0006      | 410                                     | 30                | 2                 |
| 6/18/2008     | SDO-1     | Mn                   | 0.0117                    | 0.0008      | 325                                     | 39                | 2                 |
| 6/18/2008     | MESS-1    | Fe-LEAP              | 15.5084                   | 0.1200      | 30495                                   | 1749              | 2                 |
| 6/18/2008     | NIST-2704 | Fe-LEAP              | 20.8408                   | 0.1656      | 41100                                   | 1000              | 2                 |
| 6/18/2008     | BCSS-1    | Fe-LEAP              | 16.6054                   | 0.1271      | 32873                                   | 979               | 2                 |
| 6/18/2008     | BCSS-1    | Fe-LEAP              | 16.6765                   | 0.1276      | 32873                                   | 979               | 2                 |
| 6/18/2008     | NIST-2709 | Fe-LEAP              | 17.5666                   | 0.1287      | 35000                                   | 1100              | 2                 |
| 6/18/2008     | NIST-2709 | Fe-LEAP              | 17.9326                   | 0.1390      | 35000                                   | 1100              | 2                 |
| 6/18/2008     | MAG-1     | Fe-LEAP              | 25.3363                   | 0.2064      | 47561                                   | 4197              | 2                 |
| 6/18/2008     | NIST-2711 | Fe-LEAP              | 13.7852                   | 0.1054      | 28900                                   | 600               | 2                 |
| 6/18/2008     | NIST-2711 | Fe-LEAP              | 13.8868                   | 0.1075      | 28900                                   | 600               | 2                 |
| 6/18/2008     | NIST-2586 | Fe-LEAP              | 26.7678                   | 0.2172      | 51610                                   | 1032.2            | 1                 |
| 6/18/2008     | NIST-2586 | Fe-LEAP              | 27.2305                   | 0.2248      | 51610                                   | 1032.2            | 1                 |
| 6/18/2008     | SCO-1     | Fe-LEAP              | 17.6622                   | 0.1363      | 35881                                   | 1259              | 2                 |
| 6/18/2008     | SCO-1     | Fe-LEAP              | 17.7485                   | 0.1379      | 35881                                   | 1259              | 2                 |
| 6/18/2008     | SDO-1     | Fe-LEAP              | 33.7196                   | 0.2829      | 65327                                   | 1469              | 2                 |
| 6/18/2008     | MESS-1    | Fe                   | 0.9901                    | 0.0052      | 30495                                   | 1749              | 2                 |
| 6/18/2008     | NIST-2704 | Fe                   | 1.4063                    | 0.0071      | 41100                                   | 1000              | 2                 |

| Analysis Date | SRM       | Element <sup>A</sup> | FP-XRF                    |             | Standard reference material information |                   |                   |
|---------------|-----------|----------------------|---------------------------|-------------|-----------------------------------------|-------------------|-------------------|
|               |           |                      | signal (cps) <sup>B</sup> | uncertainty | concentration (ppm)                     | uncertainty (ppm) | flag <sup>C</sup> |
| 6/18/2008     | BCSS-1    | Fe                   | 1.0650                    | 0.0055      | 32873                                   | 979               | 2                 |
| 6/18/2008     | BCSS-1    | Fe                   | 1.0820                    | 0.0056      | 32873                                   | 979               | 2                 |
| 6/18/2008     | NIST-2709 | Fe                   | 1.1372                    | 0.0057      | 35000                                   | 1100              | 2                 |
| 6/18/2008     | NIST-2709 | Fe                   | 1.1256                    | 0.0057      | 35000                                   | 1100              | 2                 |
| 6/18/2008     | MAG-1     | Fe                   | 1.6746                    | 0.0083      | 47561                                   | 4197              | 2                 |
| 6/18/2008     | NIST-2711 | Fe                   | 0.9238                    | 0.0051      | 28900                                   | 600               | 2                 |
| 6/18/2008     | NIST-2711 | Fe                   | 0.9159                    | 0.0050      | 28900                                   | 600               | 2                 |
| 6/18/2008     | NIST-2586 | Fe                   | 1.8194                    | 0.0090      | 51610                                   | 1032.2            | 1                 |
| 6/18/2008     | NIST-2586 | Fe                   | 1.8219                    | 0.0090      | 51610                                   | 1032.2            | 1                 |
| 6/18/2008     | SCO-1     | Fe                   | 1.1312                    | 0.0058      | 35881                                   | 1259              | 2                 |
| 6/18/2008     | SCO-1     | Fe                   | 1.1270                    | 0.0058      | 35881                                   | 1259              | 2                 |
| 6/18/2008     | SDO-1     | Fe                   | 2.3366                    | 0.0113      | 65327                                   | 1469              | 2                 |
| 6/18/2008     | MESS-1    | Co                   | 0.0112                    | 0.0016      | 10.8                                    | 1.9               | 2                 |
| 6/18/2008     | NIST-2704 | Co                   | 0.0164                    | 0.0019      | 14                                      | 0.6               | 2                 |
| 6/18/2008     | MAG-1     | Co                   | 0.0215                    | 0.0022      | 20                                      | 1.6               | 2                 |
| 6/18/2008     | BCSS-1    | Co                   | 0.0145                    | 0.0016      | 11.4                                    | 2.1               | 2                 |
| 6/18/2008     | BCSS-1    | Co                   | 0.0144                    | 0.0017      | 11.4                                    | 2.1               | 2                 |
| 6/18/2008     | NIST-2709 | Co                   | 0.0165                    | 0.0017      | 13.4                                    | 0.7               | 2                 |
| 6/18/2008     | NIST-2709 | Co                   | 0.0159                    | 0.0017      | 13.4                                    | 0.7               | 2                 |
| 6/18/2008     | NIST-2711 | Co                   | 0.0158                    | 0.0016      | 10                                      | 1                 | 1                 |
| 6/18/2008     | NIST-2711 | Co                   | 0.0149                    | 0.0016      | 10                                      | 1                 | 1                 |
| 6/18/2008     | NIST-2586 | Co                   | 0.0297                    | 0.0023      | 35                                      | 3.5               | 1                 |
| 6/18/2008     | NIST-2586 | Co                   | 0.0242                    | 0.0023      | 35                                      | 3.5               | 1                 |
| 6/18/2008     | SCO-1     | Co                   | 0.0153                    | 0.0017      | 11                                      | 0.8               | 2                 |
| 6/18/2008     | SCO-1     | Co                   | 0.0129                    | 0.0017      | 11                                      | 0.8               | 2                 |
| 6/18/2008     | SDO-1     | Co                   | 0.0407                    | 0.0026      | 46.8                                    | 6.3               | 2                 |
| 6/18/2008     | MESS-1    | Ni                   | 0.0034                    | 0.0005      | 29.5                                    | 2.7               | 2                 |
| 6/18/2008     | NIST-2704 | Ni                   | 0.0046                    | 0.0006      | 44.1                                    | 3                 | 2                 |
| 6/18/2008     | MAG-1     | Ni                   | 0.0047                    | 0.0007      | 53                                      | 8                 | 2                 |
| 6/18/2008     | BCSS-1    | Ni                   | 0.0044                    | 0.0006      | 55.3                                    | 3.6               | 2                 |
| 6/18/2008     | BCSS-1    | Ni                   | 0.0051                    | 0.0006      | 55.3                                    | 3.6               | 2                 |
| 6/18/2008     | NIST-2709 | Ni                   | 0.0064                    | 0.0006      | 88                                      | 5                 | 2                 |
| 6/18/2008     | NIST-2709 | Ni                   | 0.0061                    | 0.0006      | 88                                      | 5                 | 2                 |
| 6/18/2008     | NIST-2711 | Ni                   | 0.0019                    | 0.0006      | 20.6                                    | 1.1               | 2                 |
| 6/18/2008     | NIST-2711 | Ni                   | 0.0026                    | 0.0006      | 20.6                                    | 1.1               | 2                 |

| Analysis Date | SRM       | Element <sup>A</sup> | FP-XRF                    |             | Standard reference material information |                   |                   |
|---------------|-----------|----------------------|---------------------------|-------------|-----------------------------------------|-------------------|-------------------|
|               |           |                      | signal (cps) <sup>B</sup> | uncertainty | concentration (ppm)                     | uncertainty (ppm) | flag <sup>C</sup> |
| 6/18/2008     | NIST-2586 | Ni                   | 0.0054                    | 0.0007      | 75                                      | 7.5               | 1                 |
| 6/18/2008     | NIST-2586 | Ni                   | 0.0067                    | 0.0007      | 75                                      | 7.5               | 1                 |
| 6/18/2008     | SCO-1     | Ni                   | 0.0038                    | 0.0006      | 27                                      | 4                 | 2                 |
| 6/18/2008     | SCO-1     | Ni                   | 0.0039                    | 0.0006      | 27                                      | 4                 | 2                 |
| 6/18/2008     | SDO-1     | Ni                   | 0.0054                    | 0.0008      | 99.5                                    | 9.9               | 2                 |
| 6/18/2008     | NIST-2704 | Cu                   | 0.0097                    | 0.0005      | 98.6                                    | 5                 | 2                 |
| 6/18/2008     | BCSS-1    | Cu                   | 0.0020                    | 0.0004      | 18.5                                    | 2.7               | 2                 |
| 6/18/2008     | NIST-2709 | Cu                   | 0.0025                    | 0.0004      | 34.6                                    | 0.7               | 2                 |
| 6/18/2008     | NIST-2709 | Cu                   | 0.0030                    | 0.0004      | 34.6                                    | 0.7               | 2                 |
| 6/18/2008     | MAG-1     | Cu                   | 0.0020                    | 0.0004      | 30                                      | 3                 | 2                 |
| 6/18/2008     | NIST-2711 | Cu                   | 0.0098                    | 0.0005      | 114                                     | 2                 | 2                 |
| 6/18/2008     | NIST-2711 | Cu                   | 0.0099                    | 0.0005      | 114                                     | 2                 | 2                 |
| 6/18/2008     | NIST-2586 | Cu                   | 0.0065                    | 0.0005      | 81                                      | 8.1               | 1                 |
| 6/18/2008     | NIST-2586 | Cu                   | 0.0063                    | 0.0005      | 81                                      | 8.1               | 1                 |
| 6/18/2008     | SCO-1     | Cu                   | 0.0021                    | 0.0004      | 29                                      | 2                 | 2                 |
| 6/18/2008     | SCO-1     | Cu                   | 0.0023                    | 0.0004      | 29                                      | 2                 | 2                 |
| 6/18/2008     | SDO-1     | Cu                   | 0.0038                    | 0.0005      | 60.2                                    | 9.6               | 2                 |
| 6/18/2008     | MESS-1    | Zn                   | 0.0246                    | 0.0006      | 191                                     | 17                | 2                 |
| 6/18/2008     | NIST-2704 | Zn                   | 0.0564                    | 0.0009      | 438                                     | 12                | 2                 |
| 6/18/2008     | BCSS-1    | Zn                   | 0.0129                    | 0.0004      | 119                                     | 12                | 2                 |
| 6/18/2008     | BCSS-1    | Zn                   | 0.0124                    | 0.0004      | 119                                     | 12                | 2                 |
| 6/18/2008     | NIST-2709 | Zn                   | 0.0138                    | 0.0004      | 106                                     | 3                 | 2                 |
| 6/18/2008     | NIST-2709 | Zn                   | 0.0130                    | 0.0004      | 106                                     | 3                 | 2                 |
| 6/18/2008     | MAG-1     | Zn                   | 0.0163                    | 0.0006      | 130                                     | 6                 | 2                 |
| 6/18/2008     | NIST-2711 | Zn                   | 0.0441                    | 0.0009      | 350.4                                   | 4.8               | 2                 |
| 6/18/2008     | NIST-2711 | Zn                   | 0.0436                    | 0.0009      | 350.4                                   | 4.8               | 2                 |
| 6/18/2008     | NIST-2586 | Zn                   | 0.0433                    | 0.0009      | 352                                     | 17.6              | 1                 |
| 6/18/2008     | NIST-2586 | Zn                   | 0.0433                    | 0.0009      | 352                                     | 17.6              | 1                 |
| 6/18/2008     | SCO-1     | Zn                   | 0.0130                    | 0.0004      | 100                                     | 8                 | 2                 |
| 6/18/2008     | SCO-1     | Zn                   | 0.0123                    | 0.0004      | 100                                     | 8                 | 2                 |
| 6/18/2008     | SDO-1     | Zn                   | 0.0070                    | 0.0004      | 64.1                                    | 6.9               | 2                 |
| 6/18/2008     | MESS-1    | As                   | 0.0019                    | 0.0005      | 10.6                                    | 1.2               | 2                 |
| 6/18/2008     | NIST-2704 | As                   | 0.0038                    | 0.0011      | 23.4                                    | 0.8               | 2                 |
| 6/18/2008     | NIST-2710 | As                   | 0.1268                    | 0.0059      | 626                                     | 38                | 2                 |
| 6/18/2008     | BCSS-1    | As                   | 0.0027                    | 0.0005      | 11.1                                    | 1.4               | 2                 |

| Analysis Date | SRM       | Element <sup>A</sup> | FP-XRF                    |             | Standard reference material information |                   |                   |
|---------------|-----------|----------------------|---------------------------|-------------|-----------------------------------------|-------------------|-------------------|
|               |           |                      | signal (cps) <sup>B</sup> | uncertainty | concentration (ppm)                     | uncertainty (ppm) | flag <sup>C</sup> |
| 6/18/2008     | BCSS-1    | As                   | 0.0024                    | 0.0005      | 11.1                                    | 1.4               | 2                 |
| 6/18/2008     | NIST-2709 | As                   | 0.0040                    | 0.0005      | 17.7                                    | 0.8               | 2                 |
| 6/18/2008     | NIST-2709 | As                   | 0.0043                    | 0.0005      | 17.7                                    | 0.8               | 2                 |
| 6/18/2008     | NIST-2711 | As                   | 0.0145                    | 0.0024      | 105                                     | 8                 | 2                 |
| 6/18/2008     | NIST-2711 | As                   | 0.0131                    | 0.0024      | 105                                     | 8                 | 2                 |
| 6/18/2008     | SCO-1     | As                   | 0.0029                    | 0.0005      | 12                                      | 1                 | 2                 |
| 6/18/2008     | SCO-1     | As                   | 0.0029                    | 0.0005      | 12                                      | 1                 | 2                 |
| 6/18/2008     | SDO-1     | As                   | 0.0177                    | 0.0008      | 68.5                                    | 8.6               | 2                 |
| 6/18/2008     | NIST-2704 | Br                   | 0.0030                    | 0.0004      | 7                                       | 0.7               | 1                 |
| 6/18/2008     | MAG-1     | Br                   | 0.1046                    | 0.0013      | 250                                     | 25                | 1                 |
| 6/18/2008     | NIST-2711 | Br                   | 0.0039                    | 0.0004      | 5                                       | 0.5               | 1                 |
| 6/18/2008     | NIST-2711 | Br                   | 0.0039                    | 0.0004      | 5                                       | 0.5               | 1                 |
| 6/18/2008     | NIST-2704 | Rb                   | 0.0607                    | 0.0014      | 100                                     | 10                | 1                 |
| 6/18/2008     | NIST-2710 | Rb                   | 0.0763                    | 0.0021      | 120                                     | 12                | 1                 |
| 6/18/2008     | MAG-1     | Rb                   | 0.0876                    | 0.0014      | 150                                     | 6                 | 2                 |
| 6/18/2008     | NIST-2709 | Rb                   | 0.0544                    | 0.0014      | 96                                      | 9.6               | 1                 |
| 6/18/2008     | NIST-2709 | Rb                   | 0.0530                    | 0.0014      | 96                                      | 9.6               | 1                 |
| 6/18/2008     | NIST-2711 | Rb                   | 0.0699                    | 0.0014      | 110                                     | 11                | 1                 |
| 6/18/2008     | NIST-2711 | Rb                   | 0.0671                    | 0.0014      | 110                                     | 11                | 1                 |
| 6/18/2008     | SCO-1     | Rb                   | 0.0671                    | 0.0014      | 110                                     | 4                 | 2                 |
| 6/18/2008     | SCO-1     | Rb                   | 0.0671                    | 0.0014      | 110                                     | 4                 | 2                 |
| 6/18/2008     | SDO-1     | Rb                   | 0.0734                    | 0.0014      | 126                                     | 3.9               | 2                 |
| 6/18/2008     | MESS-1    | Sr                   | 0.0682                    | 0.0008      | 89                                      | 8.9               | 1                 |
| 6/18/2008     | NIST-2704 | Sr                   | 0.0987                    | 0.0016      | 130                                     | 13                | 1                 |
| 6/18/2008     | NIST-2710 | Sr                   | 0.2453                    | 0.0024      | 330                                     | 33                | 1                 |
| 6/18/2008     | MAG-1     | Sr                   | 0.0987                    | 0.0016      | 150                                     | 15                | 2                 |
| 6/18/2008     | BCSS-1    | Sr                   | 0.0752                    | 0.0008      | 96                                      | 9.6               | 1                 |
| 6/18/2008     | BCSS-1    | Sr                   | 0.0760                    | 0.0008      | 96                                      | 9.6               | 1                 |
| 6/18/2008     | NIST-2709 | Sr                   | 0.1661                    | 0.0016      | 231                                     | 2                 | 2                 |
| 6/18/2008     | NIST-2709 | Sr                   | 0.1661                    | 0.0016      | 231                                     | 2                 | 2                 |
| 6/18/2008     | NIST-2711 | Sr                   | 0.1841                    | 0.0016      | 245.3                                   | 0.7               | 2                 |
| 6/18/2008     | NIST-2711 | Sr                   | 0.1810                    | 0.0016      | 245.3                                   | 0.7               | 2                 |
| 6/18/2008     | NIST-2586 | Sr                   | 0.0596                    | 0.0008      | 84.1                                    | 8.41              | 1                 |
| 6/18/2008     | NIST-2586 | Sr                   | 0.0596                    | 0.0008      | 84.1                                    | 8.41              | 1                 |
| 6/18/2008     | SCO-1     | Sr                   | 0.1199                    | 0.0016      | 170                                     | 16                | 2                 |

| Analysis Date | SRM       | Element <sup>A</sup> | FP-XRF                    |             | Standard reference material information |                   |                   |
|---------------|-----------|----------------------|---------------------------|-------------|-----------------------------------------|-------------------|-------------------|
|               |           |                      | signal (cps) <sup>B</sup> | uncertainty | concentration (ppm)                     | uncertainty (ppm) | flag <sup>C</sup> |
| 6/18/2008     | SCO-1     | Sr                   | 0.1175                    | 0.0016      | 170                                     | 16                | 2                 |
| 6/18/2008     | SDO-1     | Sr                   | 0.0549                    | 0.0008      | 75.1                                    | 11                | 2                 |
| 6/18/2008     | NIST-2704 | Zr                   | 0.3308                    | 0.0023      | 300                                     | 30                | 1                 |
| 6/18/2008     | MAG-1     | Zr                   | 0.1227                    | 0.0023      | 130                                     | 13                | 2                 |
| 6/18/2008     | NIST-2709 | Zr                   | 0.1438                    | 0.0023      | 160                                     | 16                | 1                 |
| 6/18/2008     | NIST-2709 | Zr                   | 0.1485                    | 0.0023      | 160                                     | 16                | 1                 |
| 6/18/2008     | NIST-2711 | Zr                   | 0.2712                    | 0.0023      | 230                                     | 23                | 1                 |
| 6/18/2008     | NIST-2711 | Zr                   | 0.2724                    | 0.0023      | 230                                     | 23                | 1                 |
| 6/18/2008     | SCO-1     | Zr                   | 0.1742                    | 0.0023      | 160                                     | 30                | 2                 |
| 6/18/2008     | SCO-1     | Zr                   | 0.1695                    | 0.0023      | 160                                     | 30                | 2                 |
| 6/18/2008     | SDO-1     | Zr                   | 0.1625                    | 0.0023      | 165                                     | 24                | 2                 |
| 6/18/2008     | NIST-2704 | I-LEAP               | 0.0525                    | 0.0060      | 2                                       | 0.2               | 1                 |
| 6/18/2008     | MAG-1     | I-LEAP               | 0.0421                    | 0.0052      | 380                                     | 38                | 1                 |
| 6/18/2008     | NIST-2709 | I-LEAP               | 0.0398                    | 0.0049      | 5                                       | 0.5               | 1                 |
| 6/18/2008     | NIST-2709 | I-LEAP               | 0.0303                    | 0.0050      | 5                                       | 0.5               | 1                 |
| 6/18/2008     | NIST-2711 | I-LEAP               | 0.0391                    | 0.0052      | 3                                       | 0.3               | 1                 |
| 6/18/2008     | NIST-2711 | I-LEAP               | 0.0370                    | 0.0053      | 3                                       | 0.3               | 1                 |
| 6/18/2008     | NIST-2704 | Ba                   | 0.0804                    | 0.0048      | 414                                     | 12                | 2                 |
| 6/18/2008     | NIST-2710 | Ba                   | 0.0879                    | 0.0050      | 707                                     | 51                | 2                 |
| 6/18/2008     | MAG-1     | Ba                   | 0.0906                    | 0.0052      | 480                                     | 41                | 2                 |
| 6/18/2008     | NIST-2709 | Ba                   | 0.0890                    | 0.0042      | 968                                     | 40                | 2                 |
| 6/18/2008     | NIST-2709 | Ba                   | 0.0915                    | 0.0044      | 968                                     | 40                | 2                 |
| 6/18/2008     | NIST-2711 | Ba                   | 0.0726                    | 0.0038      | 726                                     | 38                | 2                 |
| 6/18/2008     | NIST-2711 | Ba                   | 0.0613                    | 0.0038      | 726                                     | 38                | 2                 |
| 6/18/2008     | NIST-2586 | Ba                   | 0.0957                    | 0.0056      | 413                                     | 16.52             | 1                 |
| 6/18/2008     | NIST-2586 | Ba                   | 0.1043                    | 0.0057      | 413                                     | 16.52             | 1                 |
| 6/18/2008     | SCO-1     | Ba                   | 0.0854                    | 0.0044      | 570                                     | 30                | 2                 |
| 6/18/2008     | SCO-1     | Ba                   | 0.0818                    | 0.0044      | 570                                     | 30                | 2                 |
| 6/18/2008     | SDO-1     | Ba                   | 0.0969                    | 0.0057      | 397                                     | 38                | 2                 |
| 6/18/2008     | NIST-2704 | Hg                   | 0.0009                    | 0.0003      | 1.44                                    | 0.07              | 2                 |
| 6/18/2008     | NIST-2710 | Hg                   | 0.0147                    | 0.0008      | 32.6                                    | 1.8               | 2                 |
| 6/18/2008     | MAG-1     | Hg                   | 0.0009                    | 0.0003      | 0.02                                    | 0.002             | 1                 |
| 6/18/2008     | NIST-2709 | Hg                   | 0.0008                    | 0.0003      | 1.4                                     | 0.08              | 2                 |
| 6/18/2008     | NIST-2709 | Hg                   | 0.0007                    | 0.0003      | 1.4                                     | 0.08              | 2                 |
| 6/18/2008     | NIST-2711 | Hg                   | 0.0024                    | 0.0004      | 6.25                                    | 0.19              | 2                 |

| Analysis Date | SRM       | Element <sup>A</sup> | FP-XRF                    |             | Standard reference material information |                   |                   |
|---------------|-----------|----------------------|---------------------------|-------------|-----------------------------------------|-------------------|-------------------|
|               |           |                      | signal (cps) <sup>B</sup> | uncertainty | concentration (ppm)                     | uncertainty (ppm) | flag <sup>C</sup> |
| 6/18/2008     | NIST-2711 | Hg                   | 0.0020                    | 0.0003      | 6.25                                    | 0.19              | 2                 |
| 6/18/2008     | NIST-2586 | Hg                   | 0.0011                    | 0.0003      | 0.37                                    | 0.04              | 1                 |
| 6/18/2008     | NIST-2586 | Hg                   | 0.0009                    | 0.0003      | 0.37                                    | 0.04              | 1                 |
| 6/18/2008     | SDO-1     | Hg                   | 0.0008                    | 0.0003      | 0.19                                    | 0.08              | 2                 |
| 6/18/2008     | MESS-1    | Pb                   | 0.0067                    | 0.0004      | 34                                      | 6.1               | 2                 |
| 6/18/2008     | NIST-2704 | Pb                   | 0.0304                    | 0.0009      | 161                                     | 17                | 2                 |
| 6/18/2008     | BCSS-1    | Pb                   | 0.0041                    | 0.0004      | 22.7                                    | 3.4               | 2                 |
| 6/18/2008     | BCSS-1    | Pb                   | 0.0041                    | 0.0004      | 22.7                                    | 3.4               | 2                 |
| 6/18/2008     | NIST-2709 | Pb                   | 0.0032                    | 0.0004      | 18.9                                    | 0.5               | 2                 |
| 6/18/2008     | NIST-2709 | Pb                   | 0.0030                    | 0.0004      | 18.9                                    | 0.5               | 2                 |
| 6/18/2008     | MAG-1     | Pb                   | 0.0047                    | 0.0004      | 24                                      | 3                 | 2                 |
| 6/18/2008     | NIST-2711 | Pb                   | 0.2353                    | 0.0022      | 1162                                    | 31                | 2                 |
| 6/18/2008     | NIST-2711 | Pb                   | 0.2306                    | 0.0019      | 1162                                    | 31                | 2                 |
| 6/18/2008     | NIST-2586 | Pb                   | 0.0842                    | 0.0013      | 432                                     | 17.28             | 2                 |
| 6/18/2008     | NIST-2586 | Pb                   | 0.0818                    | 0.0013      | 432                                     | 17.28             | 2                 |
| 6/18/2008     | SCO-1     | Pb                   | 0.0052                    | 0.0004      | 31                                      | 3                 | 2                 |
| 6/18/2008     | SCO-1     | Pb                   | 0.0054                    | 0.0004      | 31                                      | 3                 | 2                 |
| 6/18/2008     | SDO-1     | Pb                   | 0.0054                    | 0.0004      | 27.9                                    | 5.2               | 2                 |
| 6/18/2008     | NIST-2704 | U                    | 0.0063                    | 0.0008      | 3.13                                    | 0.13              | 2                 |
| 6/18/2008     | NIST-2710 | U                    | 0.0137                    | 0.0011      | 25                                      | 2.5               | 1                 |
| 6/18/2008     | MAG-1     | U                    | 0.0066                    | 0.0008      | 2.7                                     | 0.3               | 2                 |
| 6/18/2008     | NIST-2709 | U                    | 0.0060                    | 0.0008      | 3                                       | 0.3               | 1                 |
| 6/18/2008     | NIST-2709 | U                    | 0.0076                    | 0.0008      | 3                                       | 0.3               | 1                 |
| 6/18/2008     | NIST-2711 | U                    | 0.0066                    | 0.0008      | 2.6                                     | 0.26              | 1                 |
| 6/18/2008     | NIST-2711 | U                    | 0.0074                    | 0.0008      | 2.6                                     | 0.26              | 1                 |
| 6/18/2008     | SDO-1     | U                    | 0.0163                    | 0.0011      | 48.8                                    | 6.5               | 2                 |
| 11/14/2008    | MESS-1    | S-LEAP               | 0.0064                    | 0.0015      | 7200                                    | 500               | 2                 |
| 11/14/2008    | NIST-2710 | S-LEAP               | 0.0085                    | 0.0019      | 2400                                    | 60                | 2                 |
| 11/14/2008    | SDO-1     | S-LEAP               | 0.0165                    | 0.0019      | 53500                                   | 4400              | 2                 |
| 11/14/2008    | BCSS-1    | CI-LEAP              | 0.0351                    | 0.0023      | 11200                                   | 500               | 2                 |
| 11/14/2008    | MESS-1    | CI-LEAP              | 0.0422                    | 0.0023      | 8200                                    | 700               | 2                 |
| 11/14/2008    | MAG-1     | CI-LEAP              | 0.0875                    | 0.0033      | 31000                                   | 600               | 2                 |
| 11/14/2008    | BCSS-1    | K-LEAP               | 0.2784                    | 0.0045      | 18014                                   | 332               | 2                 |
| 11/14/2008    | MESS-1    | K-LEAP               | 0.2667                    | 0.0044      | 18595                                   | 332               | 2                 |
| 11/14/2008    | NIST-2704 | K-LEAP               | 0.3525                    | 0.0054      | 20000                                   | 400               | 2                 |

| Analysis Date | SRM       | Element <sup>A</sup> | FP-XRF                    |             | Standard reference material information |                   |                   |
|---------------|-----------|----------------------|---------------------------|-------------|-----------------------------------------|-------------------|-------------------|
|               |           |                      | signal (cps) <sup>B</sup> | uncertainty | concentration (ppm)                     | uncertainty (ppm) | flag <sup>C</sup> |
| 11/14/2008    | NIST-2709 | K-LEAP               | 0.2801                    | 0.0046      | 20300                                   | 600               | 2                 |
| 11/14/2008    | NIST-2710 | K-LEAP               | 0.3475                    | 0.0058      | 21100                                   | 1100              | 2                 |
| 11/14/2008    | NIST-2711 | K-LEAP               | 0.3640                    | 0.0052      | 24500                                   | 800               | 2                 |
| 11/14/2008    | NIST-2586 | K-LEAP               | 0.1718                    | 0.0040      | 9760                                    | 195.2             | 1                 |
| 11/14/2008    | MAG-1     | K-LEAP               | 0.4686                    | 0.0065      | 29470                                   | 1411              | 2                 |
| 11/14/2008    | SCO-1     | K-LEAP               | 0.3300                    | 0.0050      | 22995                                   | 664               | 2                 |
| 11/14/2008    | BCSS-1    | Ca-LEAP              | 0.1746                    | 0.0041      | 5432                                    | 529               | 2                 |
| 11/14/2008    | MESS-1    | Ca-LEAP              | 0.1309                    | 0.0037      | 4817                                    | 457               | 2                 |
| 11/14/2008    | NIST-2704 | Ca-LEAP              | 0.8931                    | 0.0101      | 26000                                   | 300               | 2                 |
| 11/14/2008    | NIST-2709 | Ca-LEAP              | 0.5821                    | 0.0074      | 18900                                   | 500               | 2                 |
| 11/14/2008    | NIST-2710 | Ca-LEAP              | 0.4106                    | 0.0069      | 12500                                   | 300               | 2                 |
| 11/14/2008    | NIST-2711 | Ca-LEAP              | 0.9286                    | 0.0099      | 28800                                   | 800               | 2                 |
| 11/14/2008    | NIST-2586 | Ca-LEAP              | 0.6760                    | 0.0087      | 22180                                   | 443.6             | 1                 |
| 11/14/2008    | MAG-1     | Ca-LEAP              | 0.3030                    | 0.0058      | 9791                                    | 715               | 2                 |
| 11/14/2008    | SCO-1     | Ca-LEAP              | 0.6088                    | 0.0076      | 18725                                   | 1429              | 2                 |
| 11/14/2008    | BCSS-1    | Ti-LEAP              | 0.3625                    | 0.0081      | 4400                                    | 144               | 2                 |
| 11/14/2008    | MESS-1    | Ti-LEAP              | 0.3796                    | 0.0083      | 5425                                    | 168               | 2                 |
| 11/14/2008    | NIST-2704 | Ti-LEAP              | 0.3956                    | 0.0091      | 4570                                    | 180               | 2                 |
| 11/14/2008    | NIST-2709 | Ti-LEAP              | 0.2476                    | 0.0078      | 3420                                    | 240               | 2                 |
| 11/14/2008    | NIST-2710 | Ti-LEAP              | 0.2391                    | 0.0087      | 2830                                    | 100               | 2                 |
| 11/14/2008    | NIST-2711 | Ti-LEAP              | 0.2120                    | 0.0071      | 3060                                    | 230               | 2                 |
| 11/14/2008    | NIST-2586 | Ti-LEAP              | 0.5354                    | 0.0111      | 6050                                    | 665.5             | 1                 |
| 11/14/2008    | MAG-1     | Ti-LEAP              | 0.3385                    | 0.0094      | 4496                                    | 420               | 2                 |
| 11/14/2008    | SCO-1     | Ti-LEAP              | 0.2606                    | 0.0076      | 3776                                    | 360               | 2                 |
| 11/14/2008    | SDO-1     | Ti-LEAP              | 0.3545                    | 0.0092      | 4256                                    | 186               | 2                 |
| 11/14/2008    | BCSS-1    | Ti                   | 0.0220                    | 0.0007      | 4400                                    | 144               | 2                 |
| 11/14/2008    | MESS-1    | Ti                   | 0.0244                    | 0.0007      | 5425                                    | 168               | 2                 |
| 11/14/2008    | NIST-2704 | Ti                   | 0.0234                    | 0.0007      | 4570                                    | 180               | 2                 |
| 11/14/2008    | NIST-2709 | Ti                   | 0.0124                    | 0.0019      | 3420                                    | 240               | 2                 |
| 11/14/2008    | NIST-2711 | Ti                   | 0.0154                    | 0.0006      | 3060                                    | 230               | 2                 |
| 11/14/2008    | NIST-2586 | Ti                   | 0.0342                    | 0.0009      | 6050                                    | 665.5             | 1                 |
| 11/14/2008    | MAG-1     | Ti                   | 0.0226                    | 0.0008      | 4496                                    | 420               | 2                 |
| 11/14/2008    | SCO-1     | Ti                   | 0.0169                    | 0.0006      | 3776                                    | 360               | 2                 |
| 11/14/2008    | SDO-1     | Ti                   | 0.0251                    | 0.0008      | 4256                                    | 186               | 2                 |
| 11/14/2008    | BCSS-1    | V                    | 0.0019                    | 0.0004      | 93.4                                    | 4.9               | 2                 |



| Analysis Date | SRM       | Element <sup>A</sup> | FP-XRF                    |             | Standard reference material information |                   |                   |
|---------------|-----------|----------------------|---------------------------|-------------|-----------------------------------------|-------------------|-------------------|
|               |           |                      | signal (cps) <sup>B</sup> | uncertainty | concentration (ppm)                     | uncertainty (ppm) | flag <sup>C</sup> |
| 11/14/2008    | MESS-1    | V                    | 0.0017                    | 0.0004      | 72.4                                    | 17                | 2                 |
| 11/14/2008    | NIST-2704 | V                    | 0.0025                    | 0.0004      | 95                                      | 4                 | 2                 |
| 11/14/2008    | NIST-2710 | V                    | 0.0019                    | 0.0005      | 76.6                                    | 2.3               | 2                 |
| 11/14/2008    | NIST-2711 | V                    | 0.0023                    | 0.0004      | 81.6                                    | 2.9               | 2                 |
| 11/14/2008    | NIST-2586 | V                    | 0.0041                    | 0.0005      | 160                                     | 16                | 1                 |
| 11/14/2008    | MAG-1     | V                    | 0.0037                    | 0.0005      | 140                                     | 6                 | 2                 |
| 11/14/2008    | SCO-1     | V                    | 0.0029                    | 0.0004      | 130                                     | 13                | 2                 |
| 11/14/2008    | BCSS-1    | Cr-LEAP              | 0.0410                    | 0.0028      | 123                                     | 14                | 2                 |
| 11/14/2008    | MESS-1    | Cr-LEAP              | 0.0158                    | 0.0025      | 71                                      | 11                | 2                 |
| 11/14/2008    | NIST-2704 | Cr-LEAP              | 0.0375                    | 0.0028      | 135                                     | 5                 | 2                 |
| 11/14/2008    | NIST-2709 | Cr-LEAP              | 0.0375                    | 0.0028      | 130                                     | 4                 | 2                 |
| 11/14/2008    | NIST-2711 | Cr-LEAP              | 0.0120                    | 0.0022      | 47                                      | 4.7               | 1                 |
| 11/14/2008    | NIST-2586 | Cr-LEAP              | 0.0826                    | 0.0038      | 301                                     | 45.15             | 2                 |
| 11/14/2008    | MAG-1     | Cr-LEAP              | 0.0350                    | 0.0032      | 97                                      | 8                 | 2                 |
| 11/14/2008    | SCO-1     | Cr-LEAP              | 0.0227                    | 0.0025      | 68                                      | 5                 | 2                 |
| 11/14/2008    | BCSS-1    | Cr                   | 0.0024                    | 0.0004      | 123                                     | 14                | 2                 |
| 11/14/2008    | MESS-1    | Cr                   | 0.0015                    | 0.0004      | 71                                      | 11                | 2                 |
| 11/14/2008    | NIST-2704 | Cr                   | 0.0030                    | 0.0004      | 135                                     | 5                 | 2                 |
| 11/14/2008    | NIST-2586 | Cr                   | 0.0051                    | 0.0005      | 301                                     | 45.15             | 2                 |
| 11/14/2008    | MAG-1     | Cr                   | 0.0024                    | 0.0005      | 97                                      | 8                 | 2                 |
| 11/14/2008    | SCO-1     | Cr                   | 0.0012                    | 0.0004      | 68                                      | 5                 | 2                 |
| 11/14/2008    | BCSS-1    | Mn-LEAP              | 0.0786                    | 0.0042      | 229                                     | 15                | 2                 |
| 11/14/2008    | MESS-1    | Mn-LEAP              | 0.1810                    | 0.0046      | 513                                     | 25                | 2                 |
| 11/14/2008    | NIST-2704 | Mn-LEAP              | 0.2378                    | 0.0054      | 555                                     | 19                | 2                 |
| 11/14/2008    | NIST-2709 | Mn-LEAP              | 0.2320                    | 0.0050      | 538                                     | 17                | 2                 |
| 11/14/2008    | NIST-2711 | Mn-LEAP              | 0.2441                    | 0.0050      | 638                                     | 28                | 2                 |
| 11/14/2008    | NIST-2586 | Mn-LEAP              | 0.4054                    | 0.0071      | 1000                                    | 20                | 1                 |
| 11/14/2008    | MAG-1     | Mn-LEAP              | 0.3185                    | 0.0067      | 759                                     | 70                | 2                 |
| 11/14/2008    | SCO-1     | Mn-LEAP              | 0.1689                    | 0.0046      | 410                                     | 30                | 2                 |
| 11/14/2008    | BCSS-1    | Mn                   | 0.0073                    | 0.0006      | 229                                     | 15                | 2                 |
| 11/14/2008    | MESS-1    | Mn                   | 0.0147                    | 0.0006      | 513                                     | 25                | 2                 |
| 11/14/2008    | NIST-2704 | Mn                   | 0.0148                    | 0.0007      | 555                                     | 19                | 2                 |
| 11/14/2008    | NIST-2709 | Mn                   | 0.0174                    | 0.0022      | 538                                     | 17                | 2                 |
| 11/14/2008    | NIST-2711 | Mn                   | 0.0152                    | 0.0006      | 638                                     | 28                | 2                 |
| 11/14/2008    | NIST-2586 | Mn                   | 0.0284                    | 0.0009      | 1000                                    | 20                | 1                 |

| Analysis Date | SRM       | Element <sup>A</sup> | FP-XRF                    |             | Standard reference material information |                   |                   |
|---------------|-----------|----------------------|---------------------------|-------------|-----------------------------------------|-------------------|-------------------|
|               |           |                      | signal (cps) <sup>B</sup> | uncertainty | concentration (ppm)                     | uncertainty (ppm) | flag <sup>C</sup> |
| 11/14/2008    | MAG-1     | Mn                   | 0.0233                    | 0.0009      | 759                                     | 70                | 2                 |
| 11/14/2008    | SCO-1     | Mn                   | 0.0116                    | 0.0006      | 410                                     | 30                | 2                 |
| 11/14/2008    | BCSS-1    | Fe-LEAP              | 16.0205                   | 0.1178      | 32873                                   | 979               | 2                 |
| 11/14/2008    | MESS-1    | Fe-LEAP              | 14.3527                   | 0.1059      | 30495                                   | 1749              | 2                 |
| 11/14/2008    | NIST-2704 | Fe-LEAP              | 19.9235                   | 0.1515      | 41100                                   | 1000              | 2                 |
| 11/14/2008    | NIST-2709 | Fe-LEAP              | 16.7922                   | 0.1244      | 35000                                   | 1100              | 2                 |
| 11/14/2008    | NIST-2711 | Fe-LEAP              | 13.0456                   | 0.0967      | 28900                                   | 600               | 2                 |
| 11/14/2008    | NIST-2586 | Fe-LEAP              | 25.3401                   | 0.1988      | 51610                                   | 1032.2            | 1                 |
| 11/14/2008    | MAG-1     | Fe-LEAP              | 24.1318                   | 0.1895      | 47561                                   | 4197              | 2                 |
| 11/14/2008    | SCO-1     | Fe-LEAP              | 16.3697                   | 0.1211      | 35881                                   | 1259              | 2                 |
| 11/14/2008    | BCSS-1    | Fe                   | 1.0980                    | 0.0056      | 32873                                   | 979               | 2                 |
| 11/14/2008    | MESS-1    | Fe                   | 0.9912                    | 0.0052      | 30495                                   | 1749              | 2                 |
| 11/14/2008    | NIST-2704 | Fe                   | 1.4064                    | 0.0071      | 41100                                   | 1000              | 2                 |
| 11/14/2008    | NIST-2709 | Fe                   | 1.0960                    | 0.0184      | 35000                                   | 1100              | 2                 |
| 11/14/2008    | NIST-2711 | Fe                   | 0.9341                    | 0.0051      | 28900                                   | 600               | 2                 |
| 11/14/2008    | NIST-2586 | Fe                   | 1.8155                    | 0.0089      | 51610                                   | 1032.2            | 1                 |
| 11/14/2008    | MAG-1     | Fe                   | 1.7158                    | 0.0086      | 47561                                   | 4197              | 2                 |
| 11/14/2008    | SCO-1     | Fe                   | 1.1368                    | 0.0058      | 35881                                   | 1259              | 2                 |
| 11/14/2008    | BCSS-1    | Co                   | 0.0134                    | 0.0016      | 11.4                                    | 2.1               | 2                 |
| 11/14/2008    | MESS-1    | Co                   | 0.0135                    | 0.0016      | 10.8                                    | 1.9               | 2                 |
| 11/14/2008    | NIST-2704 | Co                   | 0.0211                    | 0.0019      | 14                                      | 0.6               | 2                 |
| 11/14/2008    | NIST-2709 | Co                   | 0.0246                    | 0.0056      | 13.4                                    | 0.7               | 2                 |
| 11/14/2008    | NIST-2710 | Co                   | 0.0073                    | 0.0021      | 10                                      | 1                 | 1                 |
| 11/14/2008    | NIST-2711 | Co                   | 0.0121                    | 0.0016      | 10                                      | 1                 | 1                 |
| 11/14/2008    | NIST-2586 | Co                   | 0.0267                    | 0.0023      | 35                                      | 3.5               | 1                 |
| 11/14/2008    | MAG-1     | Co                   | 0.0172                    | 0.0022      | 20                                      | 1.6               | 2                 |
| 11/14/2008    | SCO-1     | Co                   | 0.0181                    | 0.0017      | 11                                      | 0.8               | 2                 |
| 11/14/2008    | BCSS-1    | Ni                   | 0.0053                    | 0.0006      | 55.3                                    | 3.6               | 2                 |
| 11/14/2008    | MESS-1    | Ni                   | 0.0037                    | 0.0006      | 29.5                                    | 2.7               | 2                 |
| 11/14/2008    | NIST-2704 | Ni                   | 0.0039                    | 0.0006      | 44.1                                    | 3                 | 2                 |
| 11/14/2008    | NIST-2709 | Ni                   | 0.0078                    | 0.0021      | 88                                      | 5                 | 2                 |
| 11/14/2008    | NIST-2710 | Ni                   | 0.0033                    | 0.0008      | 14.3                                    | 1                 | 2                 |
| 11/14/2008    | NIST-2711 | Ni                   | 0.0029                    | 0.0006      | 20.6                                    | 1.1               | 2                 |
| 11/14/2008    | NIST-2586 | Ni                   | 0.0078                    | 0.0008      | 75                                      | 7.5               | 1                 |
| 11/14/2008    | MAG-1     | Ni                   | 0.0064                    | 0.0007      | 53                                      | 8                 | 2                 |

| Analysis Date | SRM       | Element <sup>A</sup> | FP-XRF                    |             | Standard reference material information |                   |                   |
|---------------|-----------|----------------------|---------------------------|-------------|-----------------------------------------|-------------------|-------------------|
|               |           |                      | signal (cps) <sup>B</sup> | uncertainty | concentration (ppm)                     | uncertainty (ppm) | flag <sup>C</sup> |
| 11/14/2008    | SCO-1     | Ni                   | 0.0036                    | 0.0006      | 27                                      | 4                 | 2                 |
| 11/14/2008    | BCSS-1    | Cu                   | 0.0020                    | 0.0004      | 18.5                                    | 2.7               | 2                 |
| 11/14/2008    | MESS-1    | Cu                   | 0.0021                    | 0.0004      | 25.1                                    | 3.8               | 2                 |
| 11/14/2008    | NIST-2704 | Cu                   | 0.0095                    | 0.0005      | 98.6                                    | 5                 | 2                 |
| 11/14/2008    | NIST-2711 | Cu                   | 0.0093                    | 0.0005      | 114                                     | 2                 | 2                 |
| 11/14/2008    | NIST-2586 | Cu                   | 0.0066                    | 0.0005      | 81                                      | 8.1               | 1                 |
| 11/14/2008    | MAG-1     | Cu                   | 0.0027                    | 0.0005      | 30                                      | 3                 | 2                 |
| 11/14/2008    | SCO-1     | Cu                   | 0.0019                    | 0.0004      | 29                                      | 2                 | 2                 |
| 11/14/2008    | BCSS-1    | Zn                   | 0.0132                    | 0.0004      | 119                                     | 12                | 2                 |
| 11/14/2008    | MESS-1    | Zn                   | 0.0229                    | 0.0006      | 191                                     | 17                | 2                 |
| 11/14/2008    | NIST-2704 | Zn                   | 0.0553                    | 0.0009      | 438                                     | 12                | 2                 |
| 11/14/2008    | NIST-2709 | Zn                   | 0.0106                    | 0.0015      | 106                                     | 3                 | 2                 |
| 11/14/2008    | NIST-2711 | Zn                   | 0.0462                    | 0.0009      | 350.4                                   | 4.8               | 2                 |
| 11/14/2008    | NIST-2586 | Zn                   | 0.0426                    | 0.0009      | 352                                     | 17.6              | 1                 |
| 11/14/2008    | MAG-1     | Zn                   | 0.0172                    | 0.0006      | 130                                     | 6                 | 2                 |
| 11/14/2008    | SCO-1     | Zn                   | 0.0129                    | 0.0004      | 100                                     | 8                 | 2                 |
| 11/14/2008    | BCSS-1    | As                   | 0.0032                    | 0.0005      | 11.1                                    | 1.4               | 2                 |
| 11/14/2008    | MESS-1    | As                   | 0.0019                    | 0.0005      | 10.6                                    | 1.2               | 2                 |
| 11/14/2008    | NIST-2704 | As                   | 0.0054                    | 0.0011      | 23.4                                    | 0.8               | 2                 |
| 11/14/2008    | NIST-2709 | As                   | 0.0064                    | 0.0016      | 17.7                                    | 0.8               | 2                 |
| 11/14/2008    | NIST-2710 | As                   | 0.1351                    | 0.0059      | 626                                     | 38                | 2                 |
| 11/14/2008    | NIST-2711 | As                   | 0.0145                    | 0.0024      | 105                                     | 8                 | 2                 |
| 11/14/2008    | MAG-1     | As                   | 0.0027                    | 0.0005      | 9.2                                     | 0.92              | 1                 |
| 11/14/2008    | SCO-1     | As                   | 0.0021                    | 0.0005      | 12                                      | 1                 | 2                 |
| 11/14/2008    | NIST-2704 | Br                   | 0.0035                    | 0.0004      | 7                                       | 0.7               | 1                 |
| 11/14/2008    | NIST-2711 | Br                   | 0.0035                    | 0.0004      | 5                                       | 0.5               | 1                 |
| 11/14/2008    | MAG-1     | Br                   | 0.1042                    | 0.0013      | 250                                     | 25                | 1                 |
| 11/14/2008    | NIST-2704 | Rb                   | 0.0621                    | 0.0014      | 100                                     | 10                | 1                 |
| 11/14/2008    | NIST-2709 | Rb                   | 0.0459                    | 0.0042      | 96                                      | 9.6               | 1                 |
| 11/14/2008    | NIST-2710 | Rb                   | 0.0748                    | 0.0021      | 120                                     | 12                | 1                 |
| 11/14/2008    | NIST-2711 | Rb                   | 0.0699                    | 0.0014      | 110                                     | 11                | 1                 |
| 11/14/2008    | MAG-1     | Rb                   | 0.0890                    | 0.0014      | 150                                     | 6                 | 2                 |
| 11/14/2008    | SCO-1     | Rb                   | 0.0643                    | 0.0014      | 110                                     | 4                 | 2                 |
| 11/14/2008    | BCSS-1    | Sr                   | 0.0760                    | 0.0008      | 96                                      | 9.6               | 1                 |
| 11/14/2008    | MESS-1    | Sr                   | 0.0674                    | 0.0008      | 89                                      | 8.9               | 1                 |

| Analysis Date | SRM       | Element <sup>A</sup> | FP-XRF                    |             | Standard reference material information |                   |                   |
|---------------|-----------|----------------------|---------------------------|-------------|-----------------------------------------|-------------------|-------------------|
|               |           |                      | signal (cps) <sup>B</sup> | uncertainty | concentration (ppm)                     | uncertainty (ppm) | flag <sup>C</sup> |
| 11/14/2008    | NIST-2704 | Sr                   | 0.0979                    | 0.0016      | 130                                     | 13                | 1                 |
| 11/14/2008    | NIST-2709 | Sr                   | 0.1583                    | 0.0055      | 231                                     | 2                 | 2                 |
| 11/14/2008    | NIST-2710 | Sr                   | 0.2468                    | 0.0024      | 330                                     | 33                | 1                 |
| 11/14/2008    | NIST-2711 | Sr                   | 0.1818                    | 0.0016      | 245.3                                   | 0.7               | 2                 |
| 11/14/2008    | NIST-2586 | Sr                   | 0.0596                    | 0.0008      | 84.1                                    | 8.41              | 1                 |
| 11/14/2008    | MAG-1     | Sr                   | 0.1050                    | 0.0016      | 150                                     | 15                | 2                 |
| 11/14/2008    | SCO-1     | Sr                   | 0.1230                    | 0.0016      | 170                                     | 16                | 2                 |
| 11/14/2008    | NIST-2704 | Zr                   | 0.3261                    | 0.0023      | 300                                     | 30                | 1                 |
| 11/14/2008    | NIST-2709 | Zr                   | 0.1403                    | 0.0058      | 160                                     | 16                | 1                 |
| 11/14/2008    | NIST-2711 | Zr                   | 0.2700                    | 0.0023      | 230                                     | 23                | 1                 |
| 11/14/2008    | MAG-1     | Zr                   | 0.1321                    | 0.0023      | 130                                     | 13                | 2                 |
| 11/14/2008    | SCO-1     | Zr                   | 0.1753                    | 0.0023      | 160                                     | 30                | 2                 |
| 11/14/2008    | MESS-1    | Sn                   | 0.0120                    | 0.0030      | 3.98                                    | 0.44              | 2                 |
| 11/14/2008    | MAG-1     | Sn                   | 0.0148                    | 0.0034      | 3.6                                     | 0.36              | 1                 |
| 11/14/2008    | SDO-1     | Sn                   | 0.0105                    | 0.0032      | 3.7                                     | 1.2               | 2                 |
| 11/14/2008    | NIST-2704 | I-LEAP               | 0.0459                    | 0.0056      | 2                                       | 0.2               | 1                 |
| 11/14/2008    | NIST-2709 | I-LEAP               | 0.0474                    | 0.0048      | 5                                       | 0.5               | 1                 |
| 11/14/2008    | NIST-2711 | I-LEAP               | 0.0535                    | 0.0050      | 3                                       | 0.3               | 1                 |
| 11/14/2008    | MAG-1     | I-LEAP               | 0.0464                    | 0.0050      | 380                                     | 38                | 1                 |
| 11/14/2008    | NIST-2704 | Ba                   | 0.0687                    | 0.0044      | 414                                     | 12                | 2                 |
| 11/14/2008    | NIST-2709 | Ba                   | 0.0919                    | 0.0042      | 968                                     | 40                | 2                 |
| 11/14/2008    | NIST-2710 | Ba                   | 0.0886                    | 0.0048      | 707                                     | 51                | 2                 |
| 11/14/2008    | NIST-2711 | Ba                   | 0.0728                    | 0.0038      | 726                                     | 38                | 2                 |
| 11/14/2008    | NIST-2586 | Ba                   | 0.1017                    | 0.0054      | 413                                     | 16.52             | 1                 |
| 11/14/2008    | MAG-1     | Ba                   | 0.0925                    | 0.0048      | 480                                     | 41                | 2                 |
| 11/14/2008    | SCO-1     | Ba                   | 0.0726                    | 0.0040      | 570                                     | 30                | 2                 |
| 11/14/2008    | SDO-1     | Ba                   | 0.0955                    | 0.0048      | 397                                     | 38                | 2                 |
| 11/14/2008    | NIST-2710 | Hg                   | 0.0177                    | 0.0008      | 32.6                                    | 1.8               | 2                 |
| 11/14/2008    | NIST-2711 | Hg                   | 0.0022                    | 0.0003      | 6.25                                    | 0.19              | 2                 |
| 11/14/2008    | NIST-2586 | Hg                   | 0.0013                    | 0.0003      | 0.37                                    | 0.04              | 1                 |
| 11/14/2008    | BCSS-1    | Pb                   | 0.0039                    | 0.0004      | 22.7                                    | 3.4               | 2                 |
| 11/14/2008    | MESS-1    | Pb                   | 0.0054                    | 0.0004      | 34                                      | 6.1               | 2                 |
| 11/14/2008    | NIST-2704 | Pb                   | 0.0298                    | 0.0009      | 161                                     | 17                | 2                 |
| 11/14/2008    | NIST-2711 | Pb                   | 0.2355                    | 0.0022      | 1162                                    | 31                | 2                 |
| 11/14/2008    | NIST-2586 | Pb                   | 0.0842                    | 0.0013      | 432                                     | 17.28             | 2                 |

| Analysis Date | SRM       | Element <sup>A</sup> | FP-XRF                    |             | Standard reference material information |                   |                   |
|---------------|-----------|----------------------|---------------------------|-------------|-----------------------------------------|-------------------|-------------------|
|               |           |                      | signal (cps) <sup>B</sup> | uncertainty | concentration (ppm)                     | uncertainty (ppm) | flag <sup>C</sup> |
| 11/14/2008    | MAG-1     | Pb                   | 0.0039                    | 0.0004      | 24                                      | 3                 | 2                 |
| 11/14/2008    | SCO-1     | Pb                   | 0.0056                    | 0.0004      | 31                                      | 3                 | 2                 |
| 11/14/2008    | NIST-2704 | U                    | 0.0055                    | 0.0008      | 3.13                                    | 0.13              | 2                 |
| 11/14/2008    | NIST-2709 | U                    | 0.0097                    | 0.0026      | 3                                       | 0.3               | 1                 |
| 11/14/2008    | NIST-2710 | U                    | 0.0173                    | 0.0013      | 25                                      | 2.5               | 1                 |
| 11/14/2008    | NIST-2711 | U                    | 0.0087                    | 0.0008      | 2.6                                     | 0.26              | 1                 |
| 11/14/2008    | MAG-1     | U                    | 0.0087                    | 0.0011      | 2.7                                     | 0.3               | 2                 |

<sup>A</sup>LEAP after an element symbol indicates measurement using the Light Element Analysis Protocol

<sup>B</sup>Interference corrected Compton normalized count rates

<sup>C</sup>2=SRM concentration is certified and published uncertainty (usually the 95% confidence interval) is used;

<sup>C</sup>1= SRM concentration is recommended or informational and an uncertainty value of 10% is used.
