# Supplementary material for: Evaluation and calibration of a Field Portable X-Ray Fluorescence spectrometer for quantitative analysis of siliciclastic soils and sediments
Source: Royal Society of Chemistry journal article supplement (doi:10.1039/c0ja00133c), 2010-11-24
Supplement: c0ja00133c-ii.pdf [file c0ja00133c-ii.pdf]

**Appendix II. The FP-XRF response (adjusted cps) for SRM NIST-2709  
between 28 January 2008 and 14 November 2008**

| Analysis Date | Element <sup>A</sup> | Signal (cps) <sup>B</sup> | Uncertainty |
|---------------|----------------------|---------------------------|-------------|
| 6/19/2008     | Cl-LEAP              | 0.0130                    | 0.0020      |
| 7/10/2008     | Cl-LEAP              | 0.0064                    | 0.0021      |
| 1/28/2008     | K-LEAP               | 0.3186                    | 0.0052      |
| 2/1/2008      | K-LEAP               | 0.3214                    | 0.0052      |
| 2/1/2008      | K-LEAP               | 0.3179                    | 0.0052      |
| 2/1/2008      | K-LEAP               | 0.3191                    | 0.0052      |
| 2/1/2008      | K-LEAP               | 0.3247                    | 0.0053      |
| 2/1/2008      | K-LEAP               | 0.3240                    | 0.0052      |
| 2/8/2008      | K-LEAP               | 0.3269                    | 0.0052      |
| 2/8/2008      | K-LEAP               | 0.3119                    | 0.0051      |
| 2/13/2008     | K-LEAP               | 0.3104                    | 0.0050      |
| 2/15/2008     | K-LEAP               | 0.3177                    | 0.0051      |
| 3/2/2008      | K-LEAP               | 0.3235                    | 0.0052      |
| 4/9/2008      | K-LEAP               | 0.3220                    | 0.0052      |
| 4/18/2008     | K-LEAP               | 0.3123                    | 0.0049      |
| 4/18/2008     | K-LEAP               | 0.3172                    | 0.0051      |
| 6/9/2008      | K-LEAP               | 0.3119                    | 0.0049      |
| 6/9/2008      | K-LEAP               | 0.3357                    | 0.0054      |
| 6/10/2008     | K-LEAP               | 0.3030                    | 0.0050      |
| 6/10/2008     | K-LEAP               | 0.3334                    | 0.0053      |
| 6/10/2008     | K-LEAP               | 0.3300                    | 0.0052      |
| 6/11/2008     | K-LEAP               | 0.3139                    | 0.0052      |
| 6/11/2008     | K-LEAP               | 0.3215                    | 0.0053      |
| 6/12/2008     | K-LEAP               | 0.3178                    | 0.0051      |
| 6/12/2008     | K-LEAP               | 0.3207                    | 0.0052      |
| 6/13/2008     | K-LEAP               | 0.3182                    | 0.0050      |
| 6/13/2008     | K-LEAP               | 0.3144                    | 0.0051      |
| 6/17/2008     | K-LEAP               | 0.3178                    | 0.0052      |
| 6/19/2008     | K-LEAP               | 0.3046                    | 0.0047      |
| 6/19/2008     | K-LEAP               | 0.3115                    | 0.0051      |
| 6/20/2008     | K-LEAP               | 0.3068                    | 0.0050      |
| 7/7/2008      | K-LEAP               | 0.3105                    | 0.0050      |
| 7/7/2008      | K-LEAP               | 0.3018                    | 0.0048      |
| 7/7/2008      | K-LEAP               | 0.2775                    | 0.0047      |
| 7/8/2008      | K-LEAP               | 0.3096                    | 0.0049      |
| 7/10/2008     | K-LEAP               | 0.3059                    | 0.0050      |
| 7/10/2008     | K-LEAP               | 0.2939                    | 0.0047      |
| 7/10/2008     | K-LEAP               | 0.3057                    | 0.0050      |
| 7/11/2008     | K-LEAP               | 0.3097                    | 0.0050      |
| 7/13/2008     | K-LEAP               | 0.3072                    | 0.0049      |
| 7/15/2008     | K-LEAP               | 0.3143                    | 0.0050      |
| 7/15/2008     | K-LEAP               | 0.3196                    | 0.0051      |
| 7/30/2008     | K-LEAP               | 0.2852                    | 0.0046      |
| 10/1/2008     | K-LEAP               | 0.3018                    | 0.0048      |
| 10/1/2008     | K-LEAP               | 0.2924                    | 0.0048      |
| 11/14/2008    | K-LEAP               | 0.2801                    | 0.0046      |
| 1/28/2008     | Ca-LEAP              | 0.6721                    | 0.0086      |
| 2/1/2008      | Ca-LEAP              | 0.6510                    | 0.0083      |

| Analysis Date | Element <sup>A</sup> | Signal (cps) <sup>B</sup> | Uncertainty |
|---------------|----------------------|---------------------------|-------------|
| 2/1/2008      | Ca-LEAP              | 0.6633                    | 0.0085      |
| 2/1/2008      | Ca-LEAP              | 0.6788                    | 0.0086      |
| 2/1/2008      | Ca-LEAP              | 0.6684                    | 0.0085      |
| 2/1/2008      | Ca-LEAP              | 0.6690                    | 0.0085      |
| 2/8/2008      | Ca-LEAP              | 0.6773                    | 0.0086      |
| 2/8/2008      | Ca-LEAP              | 0.6537                    | 0.0083      |
| 2/13/2008     | Ca-LEAP              | 0.6610                    | 0.0083      |
| 2/15/2008     | Ca-LEAP              | 0.6661                    | 0.0083      |
| 3/2/2008      | Ca-LEAP              | 0.6672                    | 0.0084      |
| 4/9/2008      | Ca-LEAP              | 0.6793                    | 0.0086      |
| 4/18/2008     | Ca-LEAP              | 0.6695                    | 0.0082      |
| 4/18/2008     | Ca-LEAP              | 0.6711                    | 0.0083      |
| 6/9/2008      | Ca-LEAP              | 0.6767                    | 0.0082      |
| 6/9/2008      | Ca-LEAP              | 0.6966                    | 0.0087      |
| 6/10/2008     | Ca-LEAP              | 0.6499                    | 0.0083      |
| 6/10/2008     | Ca-LEAP              | 0.6895                    | 0.0086      |
| 6/10/2008     | Ca-LEAP              | 0.6619                    | 0.0084      |
| 6/11/2008     | Ca-LEAP              | 0.6707                    | 0.0086      |
| 6/11/2008     | Ca-LEAP              | 0.6616                    | 0.0085      |
| 6/12/2008     | Ca-LEAP              | 0.6613                    | 0.0084      |
| 6/12/2008     | Ca-LEAP              | 0.6652                    | 0.0084      |
| 6/13/2008     | Ca-LEAP              | 0.6570                    | 0.0082      |
| 6/13/2008     | Ca-LEAP              | 0.6456                    | 0.0082      |
| 6/17/2008     | Ca-LEAP              | 0.6438                    | 0.0083      |
| 6/19/2008     | Ca-LEAP              | 0.6324                    | 0.0078      |
| 6/19/2008     | Ca-LEAP              | 0.6360                    | 0.0082      |
| 6/20/2008     | Ca-LEAP              | 0.6289                    | 0.0081      |
| 7/7/2008      | Ca-LEAP              | 0.6448                    | 0.0082      |
| 7/7/2008      | Ca-LEAP              | 0.6129                    | 0.0077      |
| 7/7/2008      | Ca-LEAP              | 0.6104                    | 0.0078      |
| 7/8/2008      | Ca-LEAP              | 0.6242                    | 0.0079      |
| 7/10/2008     | Ca-LEAP              | 0.6444                    | 0.0081      |
| 7/10/2008     | Ca-LEAP              | 0.6147                    | 0.0077      |
| 7/10/2008     | Ca-LEAP              | 0.6278                    | 0.0081      |
| 7/11/2008     | Ca-LEAP              | 0.6237                    | 0.0079      |
| 7/13/2008     | Ca-LEAP              | 0.6327                    | 0.0079      |
| 7/15/2008     | Ca-LEAP              | 0.6295                    | 0.0080      |
| 7/15/2008     | Ca-LEAP              | 0.6437                    | 0.0081      |
| 7/30/2008     | Ca-LEAP              | 0.6003                    | 0.0075      |
| 10/1/2008     | Ca-LEAP              | 0.6152                    | 0.0077      |
| 10/1/2008     | Ca-LEAP              | 0.6132                    | 0.0078      |
| 11/14/2008    | Ca-LEAP              | 0.5821                    | 0.0074      |
| 1/28/2008     | Ti-LEAP              | 0.3051                    | 0.0086      |
| 2/1/2008      | Ti-LEAP              | 0.2932                    | 0.0083      |
| 2/1/2008      | Ti-LEAP              | 0.3034                    | 0.0085      |
| 2/1/2008      | Ti-LEAP              | 0.3107                    | 0.0086      |
| 2/1/2008      | Ti-LEAP              | 0.3054                    | 0.0085      |
| 2/1/2008      | Ti-LEAP              | 0.2951                    | 0.0085      |
| 2/8/2008      | Ti-LEAP              | 0.3104                    | 0.0085      |
| 2/8/2008      | Ti-LEAP              | 0.3021                    | 0.0084      |

| Analysis Date | Element <sup>A</sup> | Signal (cps) <sup>B</sup> | Uncertainty |
|---------------|----------------------|---------------------------|-------------|
| 2/13/2008     | Ti-LEAP              | 0.2933                    | 0.0083      |
| 2/15/2008     | Ti-LEAP              | 0.2956                    | 0.0083      |
| 3/2/2008      | Ti-LEAP              | 0.3024                    | 0.0084      |
| 4/9/2008      | Ti-LEAP              | 0.3017                    | 0.0085      |
| 4/18/2008     | Ti-LEAP              | 0.3074                    | 0.0083      |
| 4/18/2008     | Ti-LEAP              | 0.2974                    | 0.0084      |
| 6/9/2008      | Ti-LEAP              | 0.3007                    | 0.0082      |
| 6/9/2008      | Ti-LEAP              | 0.3253                    | 0.0088      |
| 6/10/2008     | Ti-LEAP              | 0.2895                    | 0.0083      |
| 6/10/2008     | Ti-LEAP              | 0.3088                    | 0.0085      |
| 6/10/2008     | Ti-LEAP              | 0.3100                    | 0.0085      |
| 6/11/2008     | Ti-LEAP              | 0.3015                    | 0.0086      |
| 6/11/2008     | Ti-LEAP              | 0.2979                    | 0.0086      |
| 6/12/2008     | Ti-LEAP              | 0.3144                    | 0.0085      |
| 6/12/2008     | Ti-LEAP              | 0.2934                    | 0.0084      |
| 6/13/2008     | Ti-LEAP              | 0.3100                    | 0.0083      |
| 6/13/2008     | Ti-LEAP              | 0.2997                    | 0.0083      |
| 6/17/2008     | Ti-LEAP              | 0.2965                    | 0.0084      |
| 6/19/2008     | Ti-LEAP              | 0.2703                    | 0.0081      |
| 6/19/2008     | Ti-LEAP              | 0.2650                    | 0.0083      |
| 6/20/2008     | Ti-LEAP              | 0.2736                    | 0.0082      |
| 7/7/2008      | Ti-LEAP              | 0.2755                    | 0.0083      |
| 7/7/2008      | Ti-LEAP              | 0.2575                    | 0.0079      |
| 7/7/2008      | Ti-LEAP              | 0.2721                    | 0.0081      |
| 7/8/2008      | Ti-LEAP              | 0.2782                    | 0.0082      |
| 7/10/2008     | Ti-LEAP              | 0.2786                    | 0.0083      |
| 7/10/2008     | Ti-LEAP              | 0.2644                    | 0.0079      |
| 7/10/2008     | Ti-LEAP              | 0.2841                    | 0.0083      |
| 7/11/2008     | Ti-LEAP              | 0.2708                    | 0.0082      |
| 7/13/2008     | Ti-LEAP              | 0.2774                    | 0.0082      |
| 7/15/2008     | Ti-LEAP              | 0.2778                    | 0.0083      |
| 7/15/2008     | Ti-LEAP              | 0.2746                    | 0.0083      |
| 7/30/2008     | Ti-LEAP              | 0.2663                    | 0.0077      |
| 10/1/2008     | Ti-LEAP              | 0.2670                    | 0.0078      |
| 10/1/2008     | Ti-LEAP              | 0.2736                    | 0.0080      |
| 11/14/2008    | Ti-LEAP              | 0.2476                    | 0.0078      |
| 1/28/2008     | Ti                   | 0.0166                    | 0.0006      |
| 2/1/2008      | Ti                   | 0.0160                    | 0.0006      |
| 2/1/2008      | Ti                   | 0.0157                    | 0.0006      |
| 2/1/2008      | Ti                   | 0.0167                    | 0.0006      |
| 2/1/2008      | Ti                   | 0.0172                    | 0.0006      |
| 2/1/2008      | Ti                   | 0.0155                    | 0.0006      |
| 2/8/2008      | Ti                   | 0.0170                    | 0.0006      |
| 2/8/2008      | Ti                   | 0.0163                    | 0.0006      |
| 2/13/2008     | Ti                   | 0.0165                    | 0.0006      |
| 2/15/2008     | Ti                   | 0.0169                    | 0.0006      |
| 3/2/2008      | Ti                   | 0.0168                    | 0.0006      |
| 4/9/2008      | Ti                   | 0.0177                    | 0.0006      |
| 4/18/2008     | Ti                   | 0.0172                    | 0.0006      |
| 4/18/2008     | Ti                   | 0.0170                    | 0.0006      |

| Analysis Date | Element <sup>A</sup> | Signal (cps) <sup>B</sup> | Uncertainty |
|---------------|----------------------|---------------------------|-------------|
| 6/9/2008      | Ti                   | 0.0177                    | 0.0006      |
| 6/9/2008      | Ti                   | 0.0177                    | 0.0006      |
| 6/10/2008     | Ti                   | 0.0164                    | 0.0006      |
| 6/10/2008     | Ti                   | 0.0177                    | 0.0006      |
| 6/10/2008     | Ti                   | 0.0183                    | 0.0006      |
| 6/11/2008     | Ti                   | 0.0168                    | 0.0006      |
| 6/11/2008     | Ti                   | 0.0169                    | 0.0006      |
| 6/12/2008     | Ti                   | 0.0158                    | 0.0006      |
| 6/12/2008     | Ti                   | 0.0176                    | 0.0006      |
| 6/13/2008     | Ti                   | 0.0161                    | 0.0006      |
| 6/13/2008     | Ti                   | 0.0168                    | 0.0006      |
| 6/17/2008     | Ti                   | 0.0159                    | 0.0006      |
| 6/19/2008     | Ti                   | 0.0169                    | 0.0006      |
| 6/19/2008     | Ti                   | 0.0171                    | 0.0006      |
| 6/20/2008     | Ti                   | 0.0158                    | 0.0006      |
| 7/7/2008      | Ti                   | 0.0171                    | 0.0006      |
| 7/7/2008      | Ti                   | 0.0165                    | 0.0006      |
| 7/7/2008      | Ti                   | 0.0170                    | 0.0006      |
| 7/8/2008      | Ti                   | 0.0182                    | 0.0006      |
| 7/10/2008     | Ti                   | 0.0161                    | 0.0006      |
| 7/10/2008     | Ti                   | 0.0170                    | 0.0006      |
| 7/10/2008     | Ti                   | 0.0164                    | 0.0006      |
| 7/11/2008     | Ti                   | 0.0167                    | 0.0006      |
| 7/13/2008     | Ti                   | 0.0171                    | 0.0006      |
| 7/15/2008     | Ti                   | 0.0166                    | 0.0006      |
| 7/15/2008     | Ti                   | 0.0166                    | 0.0006      |
| 7/30/2008     | Ti                   | 0.0170                    | 0.0006      |
| 10/1/2008     | Ti                   | 0.0168                    | 0.0006      |
| 10/1/2008     | Ti                   | 0.0168                    | 0.0006      |
| 11/14/2008    | Ti                   | 0.0124                    | 0.0019      |
| 1/28/2008     | V                    | 0.0023                    | 0.0004      |
| 2/1/2008      | V                    | 0.0018                    | 0.0004      |
| 2/1/2008      | V                    | 0.0022                    | 0.0004      |
| 2/1/2008      | V                    | 0.0021                    | 0.0004      |
| 2/1/2008      | V                    | 0.0020                    | 0.0004      |
| 2/1/2008      | V                    | 0.0025                    | 0.0004      |
| 2/8/2008      | V                    | 0.0020                    | 0.0004      |
| 2/8/2008      | V                    | 0.0025                    | 0.0004      |
| 2/13/2008     | V                    | 0.0022                    | 0.0004      |
| 2/15/2008     | V                    | 0.0031                    | 0.0004      |
| 3/2/2008      | V                    | 0.0021                    | 0.0004      |
| 4/9/2008      | V                    | 0.0029                    | 0.0004      |
| 4/18/2008     | V                    | 0.0027                    | 0.0004      |
| 4/18/2008     | V                    | 0.0029                    | 0.0004      |
| 6/9/2008      | V                    | 0.0027                    | 0.0004      |
| 6/9/2008      | V                    | 0.0027                    | 0.0004      |
| 6/10/2008     | V                    | 0.0029                    | 0.0004      |
| 6/10/2008     | V                    | 0.0026                    | 0.0004      |
| 6/10/2008     | V                    | 0.0024                    | 0.0004      |
| 6/11/2008     | V                    | 0.0024                    | 0.0004      |

| Analysis Date | Element <sup>A</sup> | Signal (cps) <sup>B</sup> | Uncertainty |
|---------------|----------------------|---------------------------|-------------|
| 6/11/2008     | V                    | 0.0027                    | 0.0004      |
| 6/12/2008     | V                    | 0.0029                    | 0.0004      |
| 6/12/2008     | V                    | 0.0027                    | 0.0004      |
| 6/13/2008     | V                    | 0.0028                    | 0.0004      |
| 6/13/2008     | V                    | 0.0027                    | 0.0004      |
| 6/17/2008     | V                    | 0.0036                    | 0.0004      |
| 6/19/2008     | V                    | 0.0024                    | 0.0004      |
| 6/19/2008     | V                    | 0.0025                    | 0.0004      |
| 6/20/2008     | V                    | 0.0026                    | 0.0004      |
| 7/7/2008      | V                    | 0.0033                    | 0.0004      |
| 7/7/2008      | V                    | 0.0034                    | 0.0004      |
| 7/7/2008      | V                    | 0.0030                    | 0.0004      |
| 7/8/2008      | V                    | 0.0027                    | 0.0004      |
| 7/10/2008     | V                    | 0.0027                    | 0.0004      |
| 7/10/2008     | V                    | 0.0031                    | 0.0004      |
| 7/10/2008     | V                    | 0.0031                    | 0.0004      |
| 7/11/2008     | V                    | 0.0028                    | 0.0004      |
| 7/13/2008     | V                    | 0.0027                    | 0.0004      |
| 7/15/2008     | V                    | 0.0030                    | 0.0004      |
| 7/15/2008     | V                    | 0.0029                    | 0.0004      |
| 7/30/2008     | V                    | 0.0027                    | 0.0004      |
| 10/1/2008     | V                    | 0.0026                    | 0.0004      |
| 10/1/2008     | V                    | 0.0029                    | 0.0004      |
| 1/28/2008     | Cr-LEAP              | 0.0451                    | 0.0032      |
| 2/1/2008      | Cr-LEAP              | 0.0372                    | 0.0028      |
| 2/1/2008      | Cr-LEAP              | 0.0407                    | 0.0032      |
| 2/1/2008      | Cr-LEAP              | 0.0407                    | 0.0032      |
| 2/1/2008      | Cr-LEAP              | 0.0385                    | 0.0032      |
| 2/1/2008      | Cr-LEAP              | 0.0356                    | 0.0032      |
| 2/8/2008      | Cr-LEAP              | 0.0350                    | 0.0028      |
| 2/8/2008      | Cr-LEAP              | 0.0350                    | 0.0028      |
| 2/13/2008     | Cr-LEAP              | 0.0413                    | 0.0028      |
| 2/15/2008     | Cr-LEAP              | 0.0350                    | 0.0028      |
| 3/2/2008      | Cr-LEAP              | 0.0397                    | 0.0028      |
| 4/9/2008      | Cr-LEAP              | 0.0379                    | 0.0032      |
| 4/18/2008     | Cr-LEAP              | 0.0394                    | 0.0028      |
| 4/18/2008     | Cr-LEAP              | 0.0337                    | 0.0028      |
| 6/9/2008      | Cr-LEAP              | 0.0353                    | 0.0028      |
| 6/9/2008      | Cr-LEAP              | 0.0404                    | 0.0032      |
| 6/10/2008     | Cr-LEAP              | 0.0350                    | 0.0028      |
| 6/10/2008     | Cr-LEAP              | 0.0448                    | 0.0032      |
| 6/10/2008     | Cr-LEAP              | 0.0375                    | 0.0028      |
| 6/11/2008     | Cr-LEAP              | 0.0391                    | 0.0032      |
| 6/11/2008     | Cr-LEAP              | 0.0353                    | 0.0032      |
| 6/12/2008     | Cr-LEAP              | 0.0442                    | 0.0032      |
| 6/12/2008     | Cr-LEAP              | 0.0375                    | 0.0028      |
| 6/13/2008     | Cr-LEAP              | 0.0385                    | 0.0028      |
| 6/13/2008     | Cr-LEAP              | 0.0372                    | 0.0028      |
| 6/17/2008     | Cr-LEAP              | 0.0356                    | 0.0028      |
| 6/19/2008     | Cr-LEAP              | 0.0385                    | 0.0028      |

| Analysis Date | Element <sup>A</sup> | Signal (cps) <sup>B</sup> | Uncertainty |
|---------------|----------------------|---------------------------|-------------|
| 6/19/2008     | Cr-LEAP              | 0.0356                    | 0.0028      |
| 6/20/2008     | Cr-LEAP              | 0.0344                    | 0.0028      |
| 7/7/2008      | Cr-LEAP              | 0.0356                    | 0.0028      |
| 7/7/2008      | Cr-LEAP              | 0.0407                    | 0.0028      |
| 7/7/2008      | Cr-LEAP              | 0.0397                    | 0.0028      |
| 7/8/2008      | Cr-LEAP              | 0.0397                    | 0.0028      |
| 7/10/2008     | Cr-LEAP              | 0.0356                    | 0.0028      |
| 7/10/2008     | Cr-LEAP              | 0.0375                    | 0.0028      |
| 7/10/2008     | Cr-LEAP              | 0.0391                    | 0.0028      |
| 7/11/2008     | Cr-LEAP              | 0.0407                    | 0.0028      |
| 7/13/2008     | Cr-LEAP              | 0.0391                    | 0.0028      |
| 7/15/2008     | Cr-LEAP              | 0.0379                    | 0.0028      |
| 7/15/2008     | Cr-LEAP              | 0.0413                    | 0.0028      |
| 7/30/2008     | Cr-LEAP              | 0.0353                    | 0.0028      |
| 10/1/2008     | Cr-LEAP              | 0.0366                    | 0.0028      |
| 10/1/2008     | Cr-LEAP              | 0.0347                    | 0.0028      |
| 11/14/2008    | Cr-LEAP              | 0.0375                    | 0.0028      |
| 1/28/2008     | Cr                   | 0.0019                    | 0.0004      |
| 2/1/2008      | Cr                   | 0.0024                    | 0.0004      |
| 2/1/2008      | Cr                   | 0.0024                    | 0.0004      |
| 2/1/2008      | Cr                   | 0.0020                    | 0.0004      |
| 2/1/2008      | Cr                   | 0.0016                    | 0.0004      |
| 2/1/2008      | Cr                   | 0.0016                    | 0.0004      |
| 2/8/2008      | Cr                   | 0.0019                    | 0.0004      |
| 2/8/2008      | Cr                   | 0.0015                    | 0.0004      |
| 2/13/2008     | Cr                   | 0.0022                    | 0.0004      |
| 2/15/2008     | Cr                   | 0.0021                    | 0.0004      |
| 3/2/2008      | Cr                   | 0.0025                    | 0.0004      |
| 4/9/2008      | Cr                   | 0.0017                    | 0.0004      |
| 4/18/2008     | Cr                   | 0.0026                    | 0.0004      |
| 4/18/2008     | Cr                   | 0.0021                    | 0.0004      |
| 6/9/2008      | Cr                   | 0.0021                    | 0.0004      |
| 6/9/2008      | Cr                   | 0.0029                    | 0.0004      |
| 6/10/2008     | Cr                   | 0.0024                    | 0.0004      |
| 6/10/2008     | Cr                   | 0.0020                    | 0.0004      |
| 6/10/2008     | Cr                   | 0.0021                    | 0.0004      |
| 6/11/2008     | Cr                   | 0.0016                    | 0.0004      |
| 6/11/2008     | Cr                   | 0.0024                    | 0.0004      |
| 6/12/2008     | Cr                   | 0.0019                    | 0.0004      |
| 6/12/2008     | Cr                   | 0.0020                    | 0.0004      |
| 6/13/2008     | Cr                   | 0.0025                    | 0.0004      |
| 6/13/2008     | Cr                   | 0.0022                    | 0.0004      |
| 6/17/2008     | Cr                   | 0.0021                    | 0.0004      |
| 6/19/2008     | Cr                   | 0.0020                    | 0.0004      |
| 6/19/2008     | Cr                   | 0.0019                    | 0.0004      |
| 6/20/2008     | Cr                   | 0.0019                    | 0.0004      |
| 7/7/2008      | Cr                   | 0.0019                    | 0.0004      |
| 7/7/2008      | Cr                   | 0.0022                    | 0.0004      |
| 7/7/2008      | Cr                   | 0.0017                    | 0.0004      |
| 7/8/2008      | Cr                   | 0.0027                    | 0.0004      |

| Analysis Date | Element <sup>A</sup> | Signal (cps) <sup>B</sup> | Uncertainty |
|---------------|----------------------|---------------------------|-------------|
| 2/1/2008      | Cr                   | 0.0017                    | 0.0004      |
| 7/10/2008     | Cr                   | 0.0024                    | 0.0004      |
| 7/10/2008     | Cr                   | 0.0022                    | 0.0004      |
| 7/11/2008     | Cr                   | 0.0027                    | 0.0004      |
| 7/13/2008     | Cr                   | 0.0023                    | 0.0004      |
| 7/15/2008     | Cr                   | 0.0021                    | 0.0004      |
| 7/15/2008     | Cr                   | 0.0025                    | 0.0004      |
| 7/30/2008     | Cr                   | 0.0029                    | 0.0004      |
| 10/1/2008     | Cr                   | 0.0025                    | 0.0004      |
| 10/1/2008     | Cr                   | 0.0023                    | 0.0004      |
| 1/28/2008     | Mn-LEAP              | 0.1697                    | 0.0050      |
| 2/1/2008      | Mn-LEAP              | 0.1701                    | 0.0050      |
| 2/1/2008      | Mn-LEAP              | 0.1739                    | 0.0050      |
| 2/1/2008      | Mn-LEAP              | 0.1755                    | 0.0050      |
| 2/1/2008      | Mn-LEAP              | 0.1684                    | 0.0050      |
| 2/1/2008      | Mn-LEAP              | 0.1751                    | 0.0050      |
| 2/8/2008      | Mn-LEAP              | 0.1764                    | 0.0050      |
| 2/8/2008      | Mn-LEAP              | 0.1705                    | 0.0050      |
| 2/13/2008     | Mn-LEAP              | 0.1634                    | 0.0050      |
| 2/15/2008     | Mn-LEAP              | 0.1601                    | 0.0050      |
| 3/2/2008      | Mn-LEAP              | 0.1760                    | 0.0050      |
| 4/9/2008      | Mn-LEAP              | 0.1764                    | 0.0050      |
| 4/18/2008     | Mn-LEAP              | 0.1592                    | 0.0050      |
| 4/18/2008     | Mn-LEAP              | 0.1697                    | 0.0050      |
| 6/9/2008      | Mn-LEAP              | 0.1718                    | 0.0050      |
| 6/9/2008      | Mn-LEAP              | 0.1889                    | 0.0054      |
| 6/10/2008     | Mn-LEAP              | 0.1781                    | 0.0050      |
| 6/10/2008     | Mn-LEAP              | 0.1935                    | 0.0054      |
| 6/10/2008     | Mn-LEAP              | 0.1835                    | 0.0050      |
| 6/11/2008     | Mn-LEAP              | 0.1872                    | 0.0054      |
| 6/11/2008     | Mn-LEAP              | 0.1918                    | 0.0054      |
| 6/12/2008     | Mn-LEAP              | 0.1827                    | 0.0050      |
| 6/12/2008     | Mn-LEAP              | 0.1835                    | 0.0050      |
| 6/13/2008     | Mn-LEAP              | 0.1872                    | 0.0050      |
| 6/13/2008     | Mn-LEAP              | 0.1831                    | 0.0050      |
| 6/17/2008     | Mn-LEAP              | 0.1994                    | 0.0054      |
| 6/19/2008     | Mn-LEAP              | 0.2169                    | 0.0050      |
| 6/19/2008     | Mn-LEAP              | 0.2232                    | 0.0054      |
| 6/20/2008     | Mn-LEAP              | 0.2081                    | 0.0054      |
| 7/7/2008      | Mn-LEAP              | 0.2040                    | 0.0050      |
| 7/7/2008      | Mn-LEAP              | 0.2186                    | 0.0050      |
| 7/7/2008      | Mn-LEAP              | 0.1998                    | 0.0050      |
| 7/8/2008      | Mn-LEAP              | 0.2290                    | 0.0054      |
| 7/10/2008     | Mn-LEAP              | 0.2010                    | 0.0050      |
| 7/10/2008     | Mn-LEAP              | 0.2299                    | 0.0054      |
| 7/10/2008     | Mn-LEAP              | 0.2048                    | 0.0054      |
| 7/11/2008     | Mn-LEAP              | 0.2270                    | 0.0054      |
| 7/13/2008     | Mn-LEAP              | 0.1973                    | 0.0050      |
| 7/15/2008     | Mn-LEAP              | 0.2178                    | 0.0054      |
| 7/15/2008     | Mn-LEAP              | 0.1956                    | 0.0050      |

| Analysis Date | Element <sup>A</sup> | Signal (cps) <sup>B</sup> | Uncertainty |
|---------------|----------------------|---------------------------|-------------|
| 7/30/2008     | Mn-LEAP              | 0.2199                    | 0.0050      |
| 10/1/2008     | Mn-LEAP              | 0.2098                    | 0.0050      |
| 10/1/2008     | Mn-LEAP              | 0.1918                    | 0.0050      |
| 11/14/2008    | Mn-LEAP              | 0.2320                    | 0.0050      |
| 1/28/2008     | Mn                   | 0.0104                    | 0.0006      |
| 2/1/2008      | Mn                   | 0.0099                    | 0.0006      |
| 2/1/2008      | Mn                   | 0.0106                    | 0.0006      |
| 2/1/2008      | Mn                   | 0.0089                    | 0.0006      |
| 2/1/2008      | Mn                   | 0.0095                    | 0.0006      |
| 2/1/2008      | Mn                   | 0.0102                    | 0.0006      |
| 2/8/2008      | Mn                   | 0.0104                    | 0.0006      |
| 2/8/2008      | Mn                   | 0.0108                    | 0.0006      |
| 2/13/2008     | Mn                   | 0.0095                    | 0.0006      |
| 2/15/2008     | Mn                   | 0.0092                    | 0.0006      |
| 3/2/2008      | Mn                   | 0.0094                    | 0.0006      |
| 4/9/2008      | Mn                   | 0.0095                    | 0.0006      |
| 4/18/2008     | Mn                   | 0.0104                    | 0.0006      |
| 4/18/2008     | Mn                   | 0.0101                    | 0.0006      |
| 6/9/2008      | Mn                   | 0.0106                    | 0.0006      |
| 6/9/2008      | Mn                   | 0.0095                    | 0.0006      |
| 6/10/2008     | Mn                   | 0.0101                    | 0.0006      |
| 6/10/2008     | Mn                   | 0.0118                    | 0.0006      |
| 6/10/2008     | Mn                   | 0.0107                    | 0.0006      |
| 6/11/2008     | Mn                   | 0.0109                    | 0.0006      |
| 6/11/2008     | Mn                   | 0.0110                    | 0.0006      |
| 6/12/2008     | Mn                   | 0.0124                    | 0.0006      |
| 6/12/2008     | Mn                   | 0.0103                    | 0.0006      |
| 6/13/2008     | Mn                   | 0.0111                    | 0.0006      |
| 6/13/2008     | Mn                   | 0.0095                    | 0.0006      |
| 6/17/2008     | Mn                   | 0.0113                    | 0.0006      |
| 6/19/2008     | Mn                   | 0.0147                    | 0.0006      |
| 6/19/2008     | Mn                   | 0.0138                    | 0.0006      |
| 6/20/2008     | Mn                   | 0.0129                    | 0.0006      |
| 7/7/2008      | Mn                   | 0.0126                    | 0.0006      |
| 7/7/2008      | Mn                   | 0.0153                    | 0.0007      |
| 7/7/2008      | Mn                   | 0.0132                    | 0.0006      |
| 7/8/2008      | Mn                   | 0.0156                    | 0.0007      |
| 7/10/2008     | Mn                   | 0.0132                    | 0.0006      |
| 7/10/2008     | Mn                   | 0.0156                    | 0.0007      |
| 7/10/2008     | Mn                   | 0.0136                    | 0.0006      |
| 7/11/2008     | Mn                   | 0.0143                    | 0.0007      |
| 7/13/2008     | Mn                   | 0.0136                    | 0.0006      |
| 7/15/2008     | Mn                   | 0.0151                    | 0.0007      |
| 7/15/2008     | Mn                   | 0.0133                    | 0.0006      |
| 7/30/2008     | Mn                   | 0.0159                    | 0.0007      |
| 10/1/2008     | Mn                   | 0.0115                    | 0.0006      |
| 10/1/2008     | Mn                   | 0.0122                    | 0.0006      |
| 11/14/2008    | Mn                   | 0.0174                    | 0.0022      |
| 1/28/2008     | Fe-LEAP              | 18.9015                   | 0.1477      |
| 2/1/2008      | Fe-LEAP              | 18.3747                   | 0.1428      |



| Analysis Date | Element <sup>A</sup> | Signal (cps) <sup>B</sup> | Uncertainty |
|---------------|----------------------|---------------------------|-------------|
| 2/1/2008      | Fe-LEAP              | 18.6310                   | 0.1455      |
| 2/1/2008      | Fe-LEAP              | 18.7728                   | 0.1472      |
| 2/1/2008      | Fe-LEAP              | 18.7353                   | 0.1466      |
| 2/1/2008      | Fe-LEAP              | 18.7380                   | 0.1466      |
| 2/8/2008      | Fe-LEAP              | 18.8130                   | 0.1461      |
| 2/8/2008      | Fe-LEAP              | 18.4393                   | 0.1428      |
| 2/13/2008     | Fe-LEAP              | 18.5360                   | 0.1423      |
| 2/15/2008     | Fe-LEAP              | 18.4676                   | 0.1417      |
| 3/2/2008      | Fe-LEAP              | 18.6642                   | 0.1445      |
| 4/9/2008      | Fe-LEAP              | 18.8618                   | 0.1466      |
| 4/18/2008     | Fe-LEAP              | 18.4942                   | 0.1390      |
| 4/18/2008     | Fe-LEAP              | 18.6082                   | 0.1423      |
| 6/9/2008      | Fe-LEAP              | 18.3986                   | 0.1379      |
| 6/9/2008      | Fe-LEAP              | 19.1127                   | 0.1493      |
| 6/10/2008     | Fe-LEAP              | 18.2797                   | 0.1417      |
| 6/10/2008     | Fe-LEAP              | 18.9607                   | 0.1466      |
| 6/10/2008     | Fe-LEAP              | 18.6430                   | 0.1450      |
| 6/11/2008     | Fe-LEAP              | 18.6006                   | 0.1461      |
| 6/11/2008     | Fe-LEAP              | 18.7467                   | 0.1477      |
| 6/12/2008     | Fe-LEAP              | 18.4605                   | 0.1428      |
| 6/12/2008     | Fe-LEAP              | 18.7500                   | 0.1455      |
| 6/13/2008     | Fe-LEAP              | 18.2748                   | 0.1385      |
| 6/13/2008     | Fe-LEAP              | 18.3085                   | 0.1407      |
| 6/17/2008     | Fe-LEAP              | 18.3123                   | 0.1428      |
| 6/19/2008     | Fe-LEAP              | 17.5666                   | 0.1287      |
| 6/19/2008     | Fe-LEAP              | 17.9326                   | 0.1390      |
| 6/20/2008     | Fe-LEAP              | 17.9788                   | 0.1379      |
| 7/7/2008      | Fe-LEAP              | 18.1792                   | 0.1390      |
| 7/7/2008      | Fe-LEAP              | 17.5400                   | 0.1309      |
| 7/7/2008      | Fe-LEAP              | 17.8626                   | 0.1363      |
| 7/8/2008      | Fe-LEAP              | 17.7616                   | 0.1341      |
| 7/10/2008     | Fe-LEAP              | 18.0831                   | 0.1385      |
| 7/10/2008     | Fe-LEAP              | 17.4509                   | 0.1303      |
| 7/10/2008     | Fe-LEAP              | 17.9386                   | 0.1390      |
| 7/11/2008     | Fe-LEAP              | 17.5530                   | 0.1336      |
| 7/13/2008     | Fe-LEAP              | 18.0185                   | 0.1363      |
| 7/15/2008     | Fe-LEAP              | 17.8034                   | 0.1363      |
| 7/15/2008     | Fe-LEAP              | 18.2748                   | 0.1396      |
| 7/30/2008     | Fe-LEAP              | 17.0436                   | 0.1254      |
| 10/1/2008     | Fe-LEAP              | 17.3771                   | 0.1293      |
| 10/1/2008     | Fe-LEAP              | 17.4113                   | 0.1309      |
| 11/14/2008    | Fe-LEAP              | 16.7922                   | 0.1244      |
| 1/28/2008     | Fe                   | 1.1716                    | 0.0059      |
| 2/1/2008      | Fe                   | 1.1650                    | 0.0059      |
| 2/1/2008      | Fe                   | 1.1595                    | 0.0059      |
| 2/1/2008      | Fe                   | 1.1559                    | 0.0059      |
| 2/1/2008      | Fe                   | 1.1613                    | 0.0059      |
| 2/1/2008      | Fe                   | 1.1649                    | 0.0059      |
| 2/8/2008      | Fe                   | 1.1773                    | 0.0059      |
| 2/8/2008      | Fe                   | 1.1569                    | 0.0058      |

| Analysis Date | Element <sup>A</sup> | Signal (cps) <sup>B</sup> | Uncertainty |
|---------------|----------------------|---------------------------|-------------|
| 2/13/2008     | Fe                   | 1.1445                    | 0.0057      |
| 2/15/2008     | Fe                   | 1.1379                    | 0.0057      |
| 3/2/2008      | Fe                   | 1.1837                    | 0.0059      |
| 4/9/2008      | Fe                   | 1.1856                    | 0.0060      |
| 4/18/2008     | Fe                   | 1.2183                    | 0.0060      |
| 4/18/2008     | Fe                   | 1.1853                    | 0.0059      |
| 6/9/2008      | Fe                   | 1.1697                    | 0.0058      |
| 6/9/2008      | Fe                   | 1.2063                    | 0.0060      |
| 6/10/2008     | Fe                   | 1.1400                    | 0.0058      |
| 6/10/2008     | Fe                   | 1.1867                    | 0.0059      |
| 6/10/2008     | Fe                   | 1.1906                    | 0.0060      |
| 6/11/2008     | Fe                   | 1.1390                    | 0.0058      |
| 6/11/2008     | Fe                   | 1.1490                    | 0.0059      |
| 6/12/2008     | Fe                   | 1.1372                    | 0.0058      |
| 6/12/2008     | Fe                   | 1.1643                    | 0.0059      |
| 6/13/2008     | Fe                   | 1.1729                    | 0.0059      |
| 6/13/2008     | Fe                   | 1.1617                    | 0.0059      |
| 6/17/2008     | Fe                   | 1.1429                    | 0.0058      |
| 6/19/2008     | Fe                   | 1.1372                    | 0.0057      |
| 6/19/2008     | Fe                   | 1.1256                    | 0.0057      |
| 6/20/2008     | Fe                   | 1.1369                    | 0.0057      |
| 7/7/2008      | Fe                   | 1.1540                    | 0.0058      |
| 7/7/2008      | Fe                   | 1.1555                    | 0.0058      |
| 7/7/2008      | Fe                   | 1.1315                    | 0.0057      |
| 7/8/2008      | Fe                   | 1.1614                    | 0.0058      |
| 7/10/2008     | Fe                   | 1.1513                    | 0.0058      |
| 7/10/2008     | Fe                   | 1.1409                    | 0.0057      |
| 7/10/2008     | Fe                   | 1.1656                    | 0.0060      |
| 7/11/2008     | Fe                   | 1.1667                    | 0.0059      |
| 7/13/2008     | Fe                   | 1.1533                    | 0.0058      |
| 7/15/2008     | Fe                   | 1.1767                    | 0.0059      |
| 7/15/2008     | Fe                   | 1.1536                    | 0.0058      |
| 7/30/2008     | Fe                   | 1.1274                    | 0.0057      |
| 10/1/2008     | Fe                   | 1.1382                    | 0.0057      |
| 10/1/2008     | Fe                   | 1.1315                    | 0.0057      |
| 11/14/2008    | Fe                   | 1.0960                    | 0.0184      |
| 1/28/2008     | Co                   | 0.0122                    | 0.0017      |
| 2/1/2008      | Co                   | 0.0170                    | 0.0017      |
| 2/1/2008      | Co                   | 0.0181                    | 0.0017      |
| 2/1/2008      | Co                   | 0.0164                    | 0.0017      |
| 2/1/2008      | Co                   | 0.0150                    | 0.0017      |
| 2/1/2008      | Co                   | 0.0165                    | 0.0017      |
| 2/8/2008      | Co                   | 0.0153                    | 0.0017      |
| 2/8/2008      | Co                   | 0.0178                    | 0.0017      |
| 2/13/2008     | Co                   | 0.0171                    | 0.0017      |
| 2/15/2008     | Co                   | 0.0134                    | 0.0017      |
| 3/2/2008      | Co                   | 0.0152                    | 0.0017      |
| 4/9/2008      | Co                   | 0.0165                    | 0.0017      |
| 4/18/2008     | Co                   | 0.0162                    | 0.0018      |
| 4/18/2008     | Co                   | 0.0203                    | 0.0017      |

| Analysis Date | Element <sup>A</sup> | Signal (cps) <sup>B</sup> | Uncertainty |
|---------------|----------------------|---------------------------|-------------|
| 6/9/2008      | Co                   | 0.0186                    | 0.0017      |
| 6/9/2008      | Co                   | 0.0122                    | 0.0017      |
| 6/10/2008     | Co                   | 0.0140                    | 0.0017      |
| 6/10/2008     | Co                   | 0.0157                    | 0.0017      |
| 6/10/2008     | Co                   | 0.0180                    | 0.0018      |
| 6/11/2008     | Co                   | 0.0150                    | 0.0017      |
| 6/11/2008     | Co                   | 0.0150                    | 0.0017      |
| 6/12/2008     | Co                   | 0.0175                    | 0.0017      |
| 6/12/2008     | Co                   | 0.0129                    | 0.0017      |
| 6/13/2008     | Co                   | 0.0161                    | 0.0017      |
| 6/13/2008     | Co                   | 0.0184                    | 0.0017      |
| 6/17/2008     | Co                   | 0.0174                    | 0.0017      |
| 6/19/2008     | Co                   | 0.0165                    | 0.0017      |
| 6/19/2008     | Co                   | 0.0159                    | 0.0017      |
| 6/20/2008     | Co                   | 0.0146                    | 0.0017      |
| 7/7/2008      | Co                   | 0.0150                    | 0.0017      |
| 7/7/2008      | Co                   | 0.0148                    | 0.0017      |
| 7/7/2008      | Co                   | 0.0166                    | 0.0017      |
| 7/8/2008      | Co                   | 0.0168                    | 0.0017      |
| 7/10/2008     | Co                   | 0.0163                    | 0.0017      |
| 7/10/2008     | Co                   | 0.0192                    | 0.0017      |
| 7/10/2008     | Co                   | 0.0167                    | 0.0018      |
| 7/11/2008     | Co                   | 0.0164                    | 0.0017      |
| 7/13/2008     | Co                   | 0.0157                    | 0.0017      |
| 7/15/2008     | Co                   | 0.0178                    | 0.0017      |
| 7/15/2008     | Co                   | 0.0124                    | 0.0017      |
| 7/30/2008     | Co                   | 0.0198                    | 0.0017      |
| 10/1/2008     | Co                   | 0.0159                    | 0.0017      |
| 10/1/2008     | Co                   | 0.0137                    | 0.0017      |
| 11/14/2008    | Co                   | 0.0246                    | 0.0056      |
| 1/28/2008     | Ni                   | 0.0028                    | 0.0006      |
| 2/1/2008      | Ni                   | 0.0024                    | 0.0006      |
| 2/1/2008      | Ni                   | 0.0033                    | 0.0006      |
| 2/1/2008      | Ni                   | 0.0033                    | 0.0006      |
| 2/1/2008      | Ni                   | 0.0036                    | 0.0006      |
| 2/1/2008      | Ni                   | 0.0029                    | 0.0006      |
| 2/8/2008      | Ni                   | 0.0024                    | 0.0006      |
| 2/8/2008      | Ni                   | 0.0026                    | 0.0006      |
| 2/13/2008     | Ni                   | 0.0023                    | 0.0005      |
| 2/15/2008     | Ni                   | 0.0029                    | 0.0005      |
| 3/2/2008      | Ni                   | 0.0025                    | 0.0006      |
| 4/9/2008      | Ni                   | 0.0046                    | 0.0006      |
| 4/18/2008     | Ni                   | 0.0038                    | 0.0006      |
| 4/18/2008     | Ni                   | 0.0040                    | 0.0006      |
| 6/9/2008      | Ni                   | 0.0036                    | 0.0006      |
| 6/9/2008      | Ni                   | 0.0054                    | 0.0006      |
| 6/10/2008     | Ni                   | 0.0050                    | 0.0006      |
| 6/10/2008     | Ni                   | 0.0038                    | 0.0006      |
| 6/10/2008     | Ni                   | 0.0044                    | 0.0006      |
| 6/11/2008     | Ni                   | 0.0049                    | 0.0006      |

| Analysis Date | Element <sup>A</sup> | Signal (cps) <sup>B</sup> | Uncertainty |
|---------------|----------------------|---------------------------|-------------|
| 6/11/2008     | Ni                   | 0.0046                    | 0.0006      |
| 6/12/2008     | Ni                   | 0.0046                    | 0.0006      |
| 6/12/2008     | Ni                   | 0.0046                    | 0.0006      |
| 6/13/2008     | Ni                   | 0.0047                    | 0.0006      |
| 6/13/2008     | Ni                   | 0.0042                    | 0.0006      |
| 6/17/2008     | Ni                   | 0.0044                    | 0.0006      |
| 6/19/2008     | Ni                   | 0.0064                    | 0.0006      |
| 6/19/2008     | Ni                   | 0.0061                    | 0.0006      |
| 6/20/2008     | Ni                   | 0.0051                    | 0.0006      |
| 7/7/2008      | Ni                   | 0.0068                    | 0.0006      |
| 7/7/2008      | Ni                   | 0.0061                    | 0.0006      |
| 7/7/2008      | Ni                   | 0.0063                    | 0.0006      |
| 7/8/2008      | Ni                   | 0.0071                    | 0.0006      |
| 7/10/2008     | Ni                   | 0.0056                    | 0.0006      |
| 7/10/2008     | Ni                   | 0.0067                    | 0.0006      |
| 7/10/2008     | Ni                   | 0.0055                    | 0.0006      |
| 7/11/2008     | Ni                   | 0.0061                    | 0.0006      |
| 7/13/2008     | Ni                   | 0.0053                    | 0.0006      |
| 7/15/2008     | Ni                   | 0.0061                    | 0.0006      |
| 7/15/2008     | Ni                   | 0.0053                    | 0.0006      |
| 7/30/2008     | Ni                   | 0.0056                    | 0.0006      |
| 10/1/2008     | Ni                   | 0.0057                    | 0.0006      |
| 10/1/2008     | Ni                   | 0.0057                    | 0.0006      |
| 11/14/2008    | Ni                   | 0.0078                    | 0.0021      |
| 1/28/2008     | Cu                   | 0.0027                    | 0.0004      |
| 2/1/2008      | Cu                   | 0.0027                    | 0.0004      |
| 2/1/2008      | Cu                   | 0.0027                    | 0.0004      |
| 2/1/2008      | Cu                   | 0.0027                    | 0.0004      |
| 2/1/2008      | Cu                   | 0.0030                    | 0.0004      |
| 2/1/2008      | Cu                   | 0.0022                    | 0.0004      |
| 2/8/2008      | Cu                   | 0.0026                    | 0.0004      |
| 2/8/2008      | Cu                   | 0.0025                    | 0.0004      |
| 2/13/2008     | Cu                   | 0.0027                    | 0.0004      |
| 2/15/2008     | Cu                   | 0.0029                    | 0.0004      |
| 3/2/2008      | Cu                   | 0.0037                    | 0.0004      |
| 4/9/2008      | Cu                   | 0.0036                    | 0.0004      |
| 4/18/2008     | Cu                   | 0.0038                    | 0.0004      |
| 4/18/2008     | Cu                   | 0.0031                    | 0.0004      |
| 6/9/2008      | Cu                   | 0.0035                    | 0.0004      |
| 6/9/2008      | Cu                   | 0.0022                    | 0.0004      |
| 6/10/2008     | Cu                   | 0.0022                    | 0.0004      |
| 6/10/2008     | Cu                   | 0.0032                    | 0.0004      |
| 6/10/2008     | Cu                   | 0.0029                    | 0.0004      |
| 6/11/2008     | Cu                   | 0.0032                    | 0.0004      |
| 6/11/2008     | Cu                   | 0.0027                    | 0.0004      |
| 6/12/2008     | Cu                   | 0.0036                    | 0.0004      |
| 6/12/2008     | Cu                   | 0.0031                    | 0.0004      |
| 6/13/2008     | Cu                   | 0.0030                    | 0.0004      |
| 6/13/2008     | Cu                   | 0.0025                    | 0.0004      |
| 6/17/2008     | Cu                   | 0.0027                    | 0.0004      |

| Analysis Date | Element <sup>A</sup> | Signal (cps) <sup>B</sup> | Uncertainty |
|---------------|----------------------|---------------------------|-------------|
| 6/19/2008     | Cu                   | 0.0025                    | 0.0004      |
| 6/19/2008     | Cu                   | 0.0030                    | 0.0004      |
| 6/20/2008     | Cu                   | 0.0035                    | 0.0004      |
| 7/7/2008      | Cu                   | 0.0032                    | 0.0004      |
| 7/7/2008      | Cu                   | 0.0034                    | 0.0004      |
| 7/7/2008      | Cu                   | 0.0030                    | 0.0004      |
| 7/8/2008      | Cu                   | 0.0025                    | 0.0004      |
| 7/10/2008     | Cu                   | 0.0027                    | 0.0004      |
| 7/10/2008     | Cu                   | 0.0020                    | 0.0004      |
| 7/10/2008     | Cu                   | 0.0022                    | 0.0004      |
| 7/11/2008     | Cu                   | 0.0020                    | 0.0004      |
| 7/13/2008     | Cu                   | 0.0025                    | 0.0004      |
| 7/15/2008     | Cu                   | 0.0013                    | 0.0004      |
| 7/15/2008     | Cu                   | 0.0036                    | 0.0004      |
| 7/30/2008     | Cu                   | 0.0029                    | 0.0004      |
| 10/1/2008     | Cu                   | 0.0022                    | 0.0004      |
| 10/1/2008     | Cu                   | 0.0029                    | 0.0004      |
| 1/28/2008     | Zn                   | 0.0126                    | 0.0004      |
| 2/1/2008      | Zn                   | 0.0133                    | 0.0004      |
| 2/1/2008      | Zn                   | 0.0123                    | 0.0004      |
| 2/1/2008      | Zn                   | 0.0132                    | 0.0004      |
| 2/1/2008      | Zn                   | 0.0129                    | 0.0004      |
| 2/1/2008      | Zn                   | 0.0126                    | 0.0004      |
| 2/8/2008      | Zn                   | 0.0130                    | 0.0004      |
| 2/8/2008      | Zn                   | 0.0127                    | 0.0004      |
| 2/13/2008     | Zn                   | 0.0124                    | 0.0004      |
| 2/15/2008     | Zn                   | 0.0127                    | 0.0004      |
| 3/2/2008      | Zn                   | 0.0126                    | 0.0004      |
| 4/9/2008      | Zn                   | 0.0126                    | 0.0004      |
| 4/18/2008     | Zn                   | 0.0136                    | 0.0004      |
| 4/18/2008     | Zn                   | 0.0136                    | 0.0004      |
| 6/9/2008      | Zn                   | 0.0138                    | 0.0004      |
| 6/9/2008      | Zn                   | 0.0135                    | 0.0004      |
| 6/10/2008     | Zn                   | 0.0126                    | 0.0004      |
| 6/10/2008     | Zn                   | 0.0130                    | 0.0004      |
| 6/10/2008     | Zn                   | 0.0129                    | 0.0004      |
| 6/11/2008     | Zn                   | 0.0138                    | 0.0004      |
| 6/11/2008     | Zn                   | 0.0127                    | 0.0004      |
| 6/12/2008     | Zn                   | 0.0127                    | 0.0004      |
| 6/12/2008     | Zn                   | 0.0124                    | 0.0004      |
| 6/13/2008     | Zn                   | 0.0123                    | 0.0004      |
| 6/13/2008     | Zn                   | 0.0126                    | 0.0004      |
| 6/17/2008     | Zn                   | 0.0121                    | 0.0004      |
| 6/19/2008     | Zn                   | 0.0138                    | 0.0004      |
| 6/19/2008     | Zn                   | 0.0130                    | 0.0004      |
| 6/20/2008     | Zn                   | 0.0120                    | 0.0004      |
| 7/7/2008      | Zn                   | 0.0129                    | 0.0004      |
| 7/7/2008      | Zn                   | 0.0133                    | 0.0004      |
| 7/7/2008      | Zn                   | 0.0121                    | 0.0004      |
| 7/8/2008      | Zn                   | 0.0126                    | 0.0004      |

| Analysis Date | Element <sup>A</sup> | Signal (cps) <sup>B</sup> | Uncertainty |
|---------------|----------------------|---------------------------|-------------|
| 7/10/2008     | Zn                   | 0.0127                    | 0.0004      |
| 7/10/2008     | Zn                   | 0.0129                    | 0.0004      |
| 7/10/2008     | Zn                   | 0.0123                    | 0.0004      |
| 7/11/2008     | Zn                   | 0.0130                    | 0.0004      |
| 7/13/2008     | Zn                   | 0.0126                    | 0.0004      |
| 7/15/2008     | Zn                   | 0.0130                    | 0.0004      |
| 7/15/2008     | Zn                   | 0.0130                    | 0.0004      |
| 7/30/2008     | Zn                   | 0.0127                    | 0.0004      |
| 10/1/2008     | Zn                   | 0.0130                    | 0.0004      |
| 10/1/2008     | Zn                   | 0.0130                    | 0.0004      |
| 11/14/2008    | Zn                   | 0.0106                    | 0.0015      |
| 1/28/2008     | As                   | 0.0048                    | 0.0005      |
| 2/1/2008      | As                   | 0.0046                    | 0.0005      |
| 2/1/2008      | As                   | 0.0054                    | 0.0005      |
| 2/1/2008      | As                   | 0.0046                    | 0.0005      |
| 2/1/2008      | As                   | 0.0051                    | 0.0005      |
| 2/1/2008      | As                   | 0.0046                    | 0.0005      |
| 2/8/2008      | As                   | 0.0056                    | 0.0005      |
| 2/8/2008      | As                   | 0.0048                    | 0.0005      |
| 2/13/2008     | As                   | 0.0048                    | 0.0005      |
| 2/15/2008     | As                   | 0.0054                    | 0.0005      |
| 3/2/2008      | As                   | 0.0046                    | 0.0005      |
| 4/9/2008      | As                   | 0.0046                    | 0.0005      |
| 4/18/2008     | As                   | 0.0056                    | 0.0005      |
| 4/18/2008     | As                   | 0.0048                    | 0.0005      |
| 6/9/2008      | As                   | 0.0054                    | 0.0005      |
| 6/9/2008      | As                   | 0.0048                    | 0.0005      |
| 6/10/2008     | As                   | 0.0038                    | 0.0005      |
| 6/10/2008     | As                   | 0.0048                    | 0.0005      |
| 6/10/2008     | As                   | 0.0056                    | 0.0005      |
| 6/11/2008     | As                   | 0.0056                    | 0.0005      |
| 6/11/2008     | As                   | 0.0043                    | 0.0005      |
| 6/12/2008     | As                   | 0.0048                    | 0.0005      |
| 6/12/2008     | As                   | 0.0051                    | 0.0005      |
| 6/13/2008     | As                   | 0.0046                    | 0.0005      |
| 6/13/2008     | As                   | 0.0054                    | 0.0005      |
| 6/17/2008     | As                   | 0.0035                    | 0.0005      |
| 6/19/2008     | As                   | 0.0040                    | 0.0005      |
| 6/19/2008     | As                   | 0.0043                    | 0.0005      |
| 6/20/2008     | As                   | 0.0048                    | 0.0005      |
| 7/7/2008      | As                   | 0.0048                    | 0.0005      |
| 7/7/2008      | As                   | 0.0048                    | 0.0005      |
| 7/7/2008      | As                   | 0.0043                    | 0.0005      |
| 7/8/2008      | As                   | 0.0054                    | 0.0005      |
| 7/10/2008     | As                   | 0.0046                    | 0.0005      |
| 7/10/2008     | As                   | 0.0048                    | 0.0005      |
| 7/10/2008     | As                   | 0.0043                    | 0.0005      |
| 7/11/2008     | As                   | 0.0035                    | 0.0005      |
| 7/13/2008     | As                   | 0.0046                    | 0.0005      |
| 7/15/2008     | As                   | 0.0043                    | 0.0005      |

| Analysis Date | Element <sup>A</sup> | Signal (cps) <sup>B</sup> | Uncertainty |
|---------------|----------------------|---------------------------|-------------|
| 7/15/2008     | As                   | 0.0051                    | 0.0005      |
| 7/30/2008     | As                   | 0.0040                    | 0.0005      |
| 10/1/2008     | As                   | 0.0040                    | 0.0005      |
| 10/1/2008     | As                   | 0.0059                    | 0.0005      |
| 11/14/2008    | As                   | 0.0064                    | 0.0016      |
| 2/13/2008     | Se                   | 0.0007                    | 0.0004      |
| 4/18/2008     | Se                   | 0.0007                    | 0.0004      |
| 4/18/2008     | Se                   | 0.0007                    | 0.0004      |
| 6/9/2008      | Se                   | 0.0011                    | 0.0004      |
| 6/20/2008     | Se                   | 0.0007                    | 0.0004      |
| 7/8/2008      | Se                   | 0.0007                    | 0.0004      |
| 7/11/2008     | Se                   | 0.0007                    | 0.0004      |
| 1/28/2008     | Br                   | 0.0022                    | 0.0004      |
| 2/1/2008      | Br                   | 0.0022                    | 0.0004      |
| 2/1/2008      | Br                   | 0.0022                    | 0.0004      |
| 2/1/2008      | Br                   | 0.0030                    | 0.0004      |
| 2/1/2008      | Br                   | 0.0030                    | 0.0004      |
| 2/1/2008      | Br                   | 0.0026                    | 0.0004      |
| 2/8/2008      | Br                   | 0.0039                    | 0.0004      |
| 2/8/2008      | Br                   | 0.0030                    | 0.0004      |
| 2/13/2008     | Br                   | 0.0022                    | 0.0004      |
| 2/15/2008     | Br                   | 0.0026                    | 0.0004      |
| 3/2/2008      | Br                   | 0.0026                    | 0.0004      |
| 4/9/2008      | Br                   | 0.0035                    | 0.0004      |
| 4/18/2008     | Br                   | 0.0022                    | 0.0004      |
| 4/18/2008     | Br                   | 0.0030                    | 0.0004      |
| 6/9/2008      | Br                   | 0.0026                    | 0.0004      |
| 6/9/2008      | Br                   | 0.0026                    | 0.0004      |
| 6/10/2008     | Br                   | 0.0030                    | 0.0004      |
| 6/10/2008     | Br                   | 0.0022                    | 0.0004      |
| 6/10/2008     | Br                   | 0.0022                    | 0.0004      |
| 6/11/2008     | Br                   | 0.0026                    | 0.0004      |
| 6/11/2008     | Br                   | 0.0035                    | 0.0004      |
| 6/12/2008     | Br                   | 0.0026                    | 0.0004      |
| 6/12/2008     | Br                   | 0.0026                    | 0.0004      |
| 6/13/2008     | Br                   | 0.0030                    | 0.0004      |
| 6/13/2008     | Br                   | 0.0026                    | 0.0004      |
| 6/17/2008     | Br                   | 0.0035                    | 0.0004      |
| 6/19/2008     | Br                   | 0.0030                    | 0.0004      |
| 6/19/2008     | Br                   | 0.0030                    | 0.0004      |
| 6/20/2008     | Br                   | 0.0022                    | 0.0004      |
| 7/7/2008      | Br                   | 0.0026                    | 0.0004      |
| 7/7/2008      | Br                   | 0.0026                    | 0.0004      |
| 7/7/2008      | Br                   | 0.0026                    | 0.0004      |
| 7/8/2008      | Br                   | 0.0022                    | 0.0004      |
| 7/10/2008     | Br                   | 0.0026                    | 0.0004      |
| 7/10/2008     | Br                   | 0.0026                    | 0.0004      |
| 7/10/2008     | Br                   | 0.0035                    | 0.0004      |
| 7/11/2008     | Br                   | 0.0022                    | 0.0004      |
| 7/13/2008     | Br                   | 0.0030                    | 0.0004      |

| Analysis Date | Element <sup>A</sup> | Signal (cps) <sup>B</sup> | Uncertainty |
|---------------|----------------------|---------------------------|-------------|
| 7/15/2008     | Br                   | 0.0026                    | 0.0004      |
| 7/15/2008     | Br                   | 0.0022                    | 0.0004      |
| 7/30/2008     | Br                   | 0.0017                    | 0.0004      |
| 10/1/2008     | Br                   | 0.0026                    | 0.0004      |
| 10/1/2008     | Br                   | 0.0022                    | 0.0004      |
| 1/28/2008     | Rb                   | 0.0600                    | 0.0014      |
| 2/1/2008      | Rb                   | 0.0607                    | 0.0014      |
| 2/1/2008      | Rb                   | 0.0600                    | 0.0014      |
| 2/1/2008      | Rb                   | 0.0593                    | 0.0014      |
| 2/1/2008      | Rb                   | 0.0586                    | 0.0014      |
| 2/1/2008      | Rb                   | 0.0593                    | 0.0014      |
| 2/8/2008      | Rb                   | 0.0593                    | 0.0014      |
| 2/8/2008      | Rb                   | 0.0558                    | 0.0014      |
| 2/13/2008     | Rb                   | 0.0586                    | 0.0014      |
| 2/15/2008     | Rb                   | 0.0565                    | 0.0014      |
| 3/2/2008      | Rb                   | 0.0586                    | 0.0014      |
| 4/9/2008      | Rb                   | 0.0600                    | 0.0014      |
| 4/18/2008     | Rb                   | 0.0643                    | 0.0014      |
| 4/18/2008     | Rb                   | 0.0593                    | 0.0014      |
| 6/9/2008      | Rb                   | 0.0593                    | 0.0014      |
| 6/9/2008      | Rb                   | 0.0614                    | 0.0014      |
| 6/10/2008     | Rb                   | 0.0572                    | 0.0014      |
| 6/10/2008     | Rb                   | 0.0572                    | 0.0014      |
| 6/10/2008     | Rb                   | 0.0579                    | 0.0014      |
| 6/11/2008     | Rb                   | 0.0586                    | 0.0014      |
| 6/11/2008     | Rb                   | 0.0586                    | 0.0014      |
| 6/12/2008     | Rb                   | 0.0558                    | 0.0014      |
| 6/12/2008     | Rb                   | 0.0600                    | 0.0014      |
| 6/13/2008     | Rb                   | 0.0586                    | 0.0014      |
| 6/13/2008     | Rb                   | 0.0586                    | 0.0014      |
| 6/17/2008     | Rb                   | 0.0565                    | 0.0014      |
| 6/19/2008     | Rb                   | 0.0544                    | 0.0014      |
| 6/19/2008     | Rb                   | 0.0530                    | 0.0014      |
| 6/20/2008     | Rb                   | 0.0544                    | 0.0014      |
| 7/7/2008      | Rb                   | 0.0551                    | 0.0014      |
| 7/7/2008      | Rb                   | 0.0551                    | 0.0014      |
| 7/7/2008      | Rb                   | 0.0579                    | 0.0014      |
| 7/8/2008      | Rb                   | 0.0551                    | 0.0014      |
| 7/10/2008     | Rb                   | 0.0572                    | 0.0014      |
| 7/10/2008     | Rb                   | 0.0522                    | 0.0014      |
| 7/10/2008     | Rb                   | 0.0551                    | 0.0014      |
| 7/11/2008     | Rb                   | 0.0515                    | 0.0014      |
| 7/13/2008     | Rb                   | 0.0572                    | 0.0014      |
| 7/15/2008     | Rb                   | 0.0544                    | 0.0014      |
| 7/15/2008     | Rb                   | 0.0565                    | 0.0014      |
| 7/30/2008     | Rb                   | 0.0530                    | 0.0014      |
| 10/1/2008     | Rb                   | 0.0565                    | 0.0014      |
| 10/1/2008     | Rb                   | 0.0537                    | 0.0014      |
| 11/14/2008    | Rb                   | 0.0459                    | 0.0042      |
| 1/28/2008     | Sr                   | 0.1716                    | 0.0016      |



| Analysis Date | Element <sup>A</sup> | Signal (cps) <sup>B</sup> | Uncertainty |
|---------------|----------------------|---------------------------|-------------|
| 2/1/2008      | Sr                   | 0.1685                    | 0.0016      |
| 2/1/2008      | Sr                   | 0.1693                    | 0.0016      |
| 2/1/2008      | Sr                   | 0.1685                    | 0.0016      |
| 2/1/2008      | Sr                   | 0.1716                    | 0.0016      |
| 2/1/2008      | Sr                   | 0.1693                    | 0.0016      |
| 2/8/2008      | Sr                   | 0.1724                    | 0.0016      |
| 2/8/2008      | Sr                   | 0.1677                    | 0.0016      |
| 2/13/2008     | Sr                   | 0.1614                    | 0.0016      |
| 2/15/2008     | Sr                   | 0.1606                    | 0.0016      |
| 3/2/2008      | Sr                   | 0.1716                    | 0.0016      |
| 4/9/2008      | Sr                   | 0.1693                    | 0.0016      |
| 4/18/2008     | Sr                   | 0.1724                    | 0.0016      |
| 4/18/2008     | Sr                   | 0.1724                    | 0.0016      |
| 6/9/2008      | Sr                   | 0.1708                    | 0.0016      |
| 6/9/2008      | Sr                   | 0.1716                    | 0.0016      |
| 6/10/2008     | Sr                   | 0.1677                    | 0.0016      |
| 6/10/2008     | Sr                   | 0.1724                    | 0.0016      |
| 6/10/2008     | Sr                   | 0.1724                    | 0.0016      |
| 6/11/2008     | Sr                   | 0.1661                    | 0.0016      |
| 6/11/2008     | Sr                   | 0.1685                    | 0.0016      |
| 6/12/2008     | Sr                   | 0.1638                    | 0.0016      |
| 6/12/2008     | Sr                   | 0.1716                    | 0.0016      |
| 6/13/2008     | Sr                   | 0.1685                    | 0.0016      |
| 6/13/2008     | Sr                   | 0.1685                    | 0.0016      |
| 6/17/2008     | Sr                   | 0.1685                    | 0.0016      |
| 6/19/2008     | Sr                   | 0.1661                    | 0.0016      |
| 6/19/2008     | Sr                   | 0.1661                    | 0.0016      |
| 6/20/2008     | Sr                   | 0.1638                    | 0.0016      |
| 7/7/2008      | Sr                   | 0.1661                    | 0.0016      |
| 7/7/2008      | Sr                   | 0.1677                    | 0.0016      |
| 7/7/2008      | Sr                   | 0.1653                    | 0.0016      |
| 7/8/2008      | Sr                   | 0.1638                    | 0.0016      |
| 7/10/2008     | Sr                   | 0.1677                    | 0.0016      |
| 7/10/2008     | Sr                   | 0.1646                    | 0.0016      |
| 7/10/2008     | Sr                   | 0.1653                    | 0.0016      |
| 7/11/2008     | Sr                   | 0.1630                    | 0.0016      |
| 7/13/2008     | Sr                   | 0.1653                    | 0.0016      |
| 7/15/2008     | Sr                   | 0.1653                    | 0.0016      |
| 7/15/2008     | Sr                   | 0.1693                    | 0.0016      |
| 7/30/2008     | Sr                   | 0.1630                    | 0.0016      |
| 10/1/2008     | Sr                   | 0.1653                    | 0.0016      |
| 10/1/2008     | Sr                   | 0.1661                    | 0.0016      |
| 11/14/2008    | Sr                   | 0.1583                    | 0.0055      |
| 1/28/2008     | Zr                   | 0.1403                    | 0.0023      |
| 2/1/2008      | Zr                   | 0.1368                    | 0.0023      |
| 2/1/2008      | Zr                   | 0.1333                    | 0.0023      |
| 2/1/2008      | Zr                   | 0.1368                    | 0.0023      |
| 2/1/2008      | Zr                   | 0.1344                    | 0.0023      |
| 2/1/2008      | Zr                   | 0.1309                    | 0.0023      |
| 2/8/2008      | Zr                   | 0.1414                    | 0.0023      |

| Analysis Date | Element <sup>A</sup> | Signal (cps) <sup>B</sup> | Uncertainty |
|---------------|----------------------|---------------------------|-------------|
| 2/8/2008      | Zr                   | 0.1426                    | 0.0023      |
| 2/13/2008     | Zr                   | 0.1414                    | 0.0023      |
| 2/15/2008     | Zr                   | 0.1391                    | 0.0023      |
| 3/2/2008      | Zr                   | 0.1356                    | 0.0023      |
| 4/9/2008      | Zr                   | 0.1531                    | 0.0023      |
| 4/18/2008     | Zr                   | 0.1520                    | 0.0023      |
| 4/18/2008     | Zr                   | 0.1485                    | 0.0023      |
| 6/9/2008      | Zr                   | 0.1414                    | 0.0023      |
| 6/9/2008      | Zr                   | 0.1461                    | 0.0023      |
| 6/10/2008     | Zr                   | 0.1496                    | 0.0023      |
| 6/10/2008     | Zr                   | 0.1496                    | 0.0023      |
| 6/10/2008     | Zr                   | 0.1543                    | 0.0023      |
| 6/11/2008     | Zr                   | 0.1555                    | 0.0023      |
| 6/11/2008     | Zr                   | 0.1496                    | 0.0023      |
| 6/12/2008     | Zr                   | 0.1555                    | 0.0023      |
| 6/12/2008     | Zr                   | 0.1391                    | 0.0023      |
| 6/13/2008     | Zr                   | 0.1438                    | 0.0023      |
| 6/13/2008     | Zr                   | 0.1426                    | 0.0023      |
| 6/17/2008     | Zr                   | 0.1461                    | 0.0023      |
| 6/19/2008     | Zr                   | 0.1438                    | 0.0023      |
| 6/19/2008     | Zr                   | 0.1485                    | 0.0023      |
| 6/20/2008     | Zr                   | 0.1391                    | 0.0023      |
| 7/7/2008      | Zr                   | 0.1379                    | 0.0023      |
| 7/7/2008      | Zr                   | 0.1379                    | 0.0023      |
| 7/7/2008      | Zr                   | 0.1414                    | 0.0023      |
| 7/8/2008      | Zr                   | 0.1391                    | 0.0023      |
| 7/10/2008     | Zr                   | 0.1438                    | 0.0023      |
| 7/10/2008     | Zr                   | 0.1438                    | 0.0023      |
| 7/10/2008     | Zr                   | 0.1391                    | 0.0023      |
| 7/11/2008     | Zr                   | 0.1333                    | 0.0023      |
| 7/13/2008     | Zr                   | 0.1391                    | 0.0023      |
| 7/15/2008     | Zr                   | 0.1403                    | 0.0023      |
| 7/15/2008     | Zr                   | 0.1473                    | 0.0023      |
| 7/30/2008     | Zr                   | 0.1438                    | 0.0023      |
| 10/1/2008     | Zr                   | 0.1391                    | 0.0023      |
| 10/1/2008     | Zr                   | 0.1403                    | 0.0023      |
| 11/14/2008    | Zr                   | 0.1403                    | 0.0058      |
| 3/2/2008      | Mo                   | 0.0062                    | 0.0012      |
| 4/18/2008     | Mo                   | 0.0062                    | 0.0012      |
| 6/10/2008     | Ag                   | 0.0131                    | 0.0036      |
| 6/11/2008     | Ag                   | 0.0127                    | 0.0036      |
| 6/12/2008     | Ag                   | 0.0134                    | 0.0036      |
| 6/13/2008     | Ag                   | 0.0131                    | 0.0036      |
| 6/20/2008     | Ag                   | 0.0138                    | 0.0036      |
| 7/10/2008     | Ag                   | 0.0116                    | 0.0036      |
| 7/15/2008     | Ag                   | 0.0116                    | 0.0036      |
| 6/9/2008      | Cd                   | 0.0114                    | 0.0036      |
| 6/11/2008     | Cd                   | 0.0126                    | 0.0036      |
| 6/12/2008     | Cd                   | 0.0156                    | 0.0036      |
| 6/13/2008     | Cd                   | 0.0129                    | 0.0036      |

| Analysis Date | Element <sup>A</sup> | Signal (cps) <sup>B</sup> | Uncertainty |
|---------------|----------------------|---------------------------|-------------|
| 6/13/2008     | Cd                   | 0.0135                    | 0.0036      |
| 7/7/2008      | Cd                   | 0.0114                    | 0.0036      |
| 6/10/2008     | I-LEAP               | 0.0167                    | 0.0049      |
| 6/10/2008     | I-LEAP               | 0.0170                    | 0.0050      |
| 6/11/2008     | I-LEAP               | 0.0281                    | 0.0051      |
| 6/12/2008     | I-LEAP               | 0.0173                    | 0.0050      |
| 6/17/2008     | I-LEAP               | 0.0204                    | 0.0050      |
| 6/19/2008     | I-LEAP               | 0.0398                    | 0.0049      |
| 6/19/2008     | I-LEAP               | 0.0303                    | 0.0050      |
| 6/20/2008     | I-LEAP               | 0.0233                    | 0.0049      |
| 7/7/2008      | I-LEAP               | 0.0244                    | 0.0049      |
| 7/7/2008      | I-LEAP               | 0.0318                    | 0.0048      |
| 7/7/2008      | I-LEAP               | 0.0298                    | 0.0049      |
| 7/8/2008      | I-LEAP               | 0.0396                    | 0.0049      |
| 7/10/2008     | I-LEAP               | 0.0220                    | 0.0049      |
| 7/10/2008     | I-LEAP               | 0.0321                    | 0.0048      |
| 7/10/2008     | I-LEAP               | 0.0271                    | 0.0050      |
| 7/11/2008     | I-LEAP               | 0.0311                    | 0.0049      |
| 7/13/2008     | I-LEAP               | 0.0240                    | 0.0048      |
| 7/15/2008     | I-LEAP               | 0.0345                    | 0.0050      |
| 7/15/2008     | I-LEAP               | 0.0285                    | 0.0049      |
| 7/30/2008     | I-LEAP               | 0.0337                    | 0.0047      |
| 10/1/2008     | I-LEAP               | 0.0306                    | 0.0047      |
| 10/1/2008     | I-LEAP               | 0.0289                    | 0.0048      |
| 11/14/2008    | I-LEAP               | 0.0474                    | 0.0048      |
| 1/28/2008     | Ba                   | 0.0841                    | 0.0044      |
| 2/1/2008      | Ba                   | 0.0768                    | 0.0044      |
| 2/1/2008      | Ba                   | 0.0839                    | 0.0044      |
| 2/1/2008      | Ba                   | 0.0787                    | 0.0044      |
| 2/1/2008      | Ba                   | 0.0796                    | 0.0044      |
| 2/1/2008      | Ba                   | 0.0875                    | 0.0044      |
| 2/8/2008      | Ba                   | 0.0802                    | 0.0044      |
| 2/8/2008      | Ba                   | 0.0812                    | 0.0044      |
| 2/13/2008     | Ba                   | 0.0814                    | 0.0044      |
| 2/15/2008     | Ba                   | 0.0787                    | 0.0042      |
| 3/2/2008      | Ba                   | 0.0810                    | 0.0044      |
| 4/9/2008      | Ba                   | 0.0856                    | 0.0044      |
| 4/18/2008     | Ba                   | 0.0833                    | 0.0042      |
| 4/18/2008     | Ba                   | 0.0927                    | 0.0044      |
| 6/9/2008      | Ba                   | 0.0804                    | 0.0042      |
| 6/9/2008      | Ba                   | 0.0856                    | 0.0046      |
| 6/10/2008     | Ba                   | 0.0846                    | 0.0044      |
| 6/10/2008     | Ba                   | 0.0804                    | 0.0044      |
| 6/10/2008     | Ba                   | 0.0819                    | 0.0044      |
| 6/11/2008     | Ba                   | 0.0902                    | 0.0046      |
| 6/11/2008     | Ba                   | 0.0835                    | 0.0044      |
| 6/12/2008     | Ba                   | 0.0787                    | 0.0044      |
| 6/12/2008     | Ba                   | 0.0858                    | 0.0044      |
| 6/13/2008     | Ba                   | 0.0745                    | 0.0042      |
| 6/13/2008     | Ba                   | 0.0814                    | 0.0044      |

| Analysis Date | Element <sup>A</sup> | Signal (cps) <sup>B</sup> | Uncertainty |
|---------------|----------------------|---------------------------|-------------|
| 6/17/2008     | Ba                   | 0.0841                    | 0.0044      |
| 6/19/2008     | Ba                   | 0.0890                    | 0.0042      |
| 6/19/2008     | Ba                   | 0.0915                    | 0.0044      |
| 6/20/2008     | Ba                   | 0.0881                    | 0.0044      |
| 7/7/2008      | Ba                   | 0.0938                    | 0.0044      |
| 7/7/2008      | Ba                   | 0.0883                    | 0.0042      |
| 7/7/2008      | Ba                   | 0.0796                    | 0.0042      |
| 7/8/2008      | Ba                   | 0.0856                    | 0.0042      |
| 7/10/2008     | Ba                   | 0.0879                    | 0.0044      |
| 7/10/2008     | Ba                   | 0.0892                    | 0.0042      |
| 7/10/2008     | Ba                   | 0.0818                    | 0.0044      |
| 7/11/2008     | Ba                   | 0.0892                    | 0.0044      |
| 7/13/2008     | Ba                   | 0.0881                    | 0.0042      |
| 7/15/2008     | Ba                   | 0.0871                    | 0.0044      |
| 7/15/2008     | Ba                   | 0.0900                    | 0.0044      |
| 7/30/2008     | Ba                   | 0.0821                    | 0.0040      |
| 10/1/2008     | Ba                   | 0.0781                    | 0.0040      |
| 10/1/2008     | Ba                   | 0.0810                    | 0.0042      |
| 11/14/2008    | Ba                   | 0.0919                    | 0.0042      |
| 1/28/2008     | Hg                   | 0.0009                    | 0.0003      |
| 2/1/2008      | Hg                   | 0.0011                    | 0.0003      |
| 2/1/2008      | Hg                   | 0.0011                    | 0.0003      |
| 2/1/2008      | Hg                   | 0.0007                    | 0.0003      |
| 2/1/2008      | Hg                   | 0.0009                    | 0.0003      |
| 2/8/2008      | Hg                   | 0.0008                    | 0.0003      |
| 2/13/2008     | Hg                   | 0.0008                    | 0.0003      |
| 2/15/2008     | Hg                   | 0.0009                    | 0.0003      |
| 3/2/2008      | Hg                   | 0.0009                    | 0.0003      |
| 4/18/2008     | Hg                   | 0.0014                    | 0.0003      |
| 4/18/2008     | Hg                   | 0.0011                    | 0.0003      |
| 6/9/2008      | Hg                   | 0.0013                    | 0.0003      |
| 6/10/2008     | Hg                   | 0.0009                    | 0.0003      |
| 6/10/2008     | Hg                   | 0.0009                    | 0.0003      |
| 6/10/2008     | Hg                   | 0.0013                    | 0.0003      |
| 6/11/2008     | Hg                   | 0.0007                    | 0.0003      |
| 6/12/2008     | Hg                   | 0.0009                    | 0.0003      |
| 6/13/2008     | Hg                   | 0.0008                    | 0.0003      |
| 6/19/2008     | Hg                   | 0.0008                    | 0.0003      |
| 6/19/2008     | Hg                   | 0.0007                    | 0.0003      |
| 6/20/2008     | Hg                   | 0.0011                    | 0.0003      |
| 7/7/2008      | Hg                   | 0.0008                    | 0.0003      |
| 7/7/2008      | Hg                   | 0.0009                    | 0.0003      |
| 7/8/2008      | Hg                   | 0.0011                    | 0.0003      |
| 7/10/2008     | Hg                   | 0.0009                    | 0.0003      |
| 7/10/2008     | Hg                   | 0.0012                    | 0.0003      |
| 7/10/2008     | Hg                   | 0.0007                    | 0.0003      |
| 7/11/2008     | Hg                   | 0.0011                    | 0.0003      |
| 7/13/2008     | Hg                   | 0.0012                    | 0.0003      |
| 7/15/2008     | Hg                   | 0.0013                    | 0.0003      |
| 7/15/2008     | Hg                   | 0.0008                    | 0.0003      |

| Analysis Date | Element <sup>A</sup> | Signal (cps) <sup>B</sup> | Uncertainty |
|---------------|----------------------|---------------------------|-------------|
| 7/30/2008     | Hg                   | 0.0012                    | 0.0003      |
| 10/1/2008     | Hg                   | 0.0009                    | 0.0003      |
| 10/1/2008     | Hg                   | 0.0011                    | 0.0003      |
| 1/28/2008     | Pb                   | 0.0032                    | 0.0004      |
| 2/1/2008      | Pb                   | 0.0035                    | 0.0004      |
| 2/1/2008      | Pb                   | 0.0024                    | 0.0004      |
| 2/1/2008      | Pb                   | 0.0032                    | 0.0004      |
| 2/1/2008      | Pb                   | 0.0030                    | 0.0004      |
| 2/1/2008      | Pb                   | 0.0035                    | 0.0004      |
| 2/8/2008      | Pb                   | 0.0024                    | 0.0004      |
| 2/8/2008      | Pb                   | 0.0035                    | 0.0004      |
| 2/13/2008     | Pb                   | 0.0030                    | 0.0004      |
| 2/15/2008     | Pb                   | 0.0028                    | 0.0004      |
| 3/2/2008      | Pb                   | 0.0037                    | 0.0004      |
| 4/9/2008      | Pb                   | 0.0032                    | 0.0004      |
| 4/18/2008     | Pb                   | 0.0032                    | 0.0004      |
| 4/18/2008     | Pb                   | 0.0032                    | 0.0004      |
| 6/9/2008      | Pb                   | 0.0032                    | 0.0004      |
| 6/9/2008      | Pb                   | 0.0030                    | 0.0004      |
| 6/10/2008     | Pb                   | 0.0035                    | 0.0004      |
| 6/10/2008     | Pb                   | 0.0030                    | 0.0004      |
| 6/10/2008     | Pb                   | 0.0024                    | 0.0004      |
| 6/11/2008     | Pb                   | 0.0022                    | 0.0004      |
| 6/11/2008     | Pb                   | 0.0037                    | 0.0004      |
| 6/12/2008     | Pb                   | 0.0032                    | 0.0004      |
| 6/12/2008     | Pb                   | 0.0032                    | 0.0004      |
| 6/13/2008     | Pb                   | 0.0037                    | 0.0004      |
| 6/13/2008     | Pb                   | 0.0030                    | 0.0004      |
| 6/17/2008     | Pb                   | 0.0037                    | 0.0004      |
| 6/19/2008     | Pb                   | 0.0032                    | 0.0004      |
| 6/19/2008     | Pb                   | 0.0030                    | 0.0004      |
| 6/20/2008     | Pb                   | 0.0026                    | 0.0004      |
| 7/7/2008      | Pb                   | 0.0026                    | 0.0004      |
| 7/7/2008      | Pb                   | 0.0030                    | 0.0004      |
| 7/7/2008      | Pb                   | 0.0037                    | 0.0004      |
| 7/8/2008      | Pb                   | 0.0030                    | 0.0004      |
| 7/10/2008     | Pb                   | 0.0030                    | 0.0004      |
| 7/10/2008     | Pb                   | 0.0032                    | 0.0004      |
| 7/10/2008     | Pb                   | 0.0039                    | 0.0004      |
| 7/11/2008     | Pb                   | 0.0037                    | 0.0004      |
| 7/13/2008     | Pb                   | 0.0032                    | 0.0004      |
| 7/15/2008     | Pb                   | 0.0035                    | 0.0004      |
| 7/15/2008     | Pb                   | 0.0028                    | 0.0004      |
| 7/30/2008     | Pb                   | 0.0035                    | 0.0004      |
| 10/1/2008     | Pb                   | 0.0032                    | 0.0004      |
| 10/1/2008     | Pb                   | 0.0026                    | 0.0004      |
| 1/28/2008     | Bi                   | 0.0031                    | 0.0003      |
| 2/1/2008      | Bi                   | 0.0028                    | 0.0003      |
| 2/1/2008      | Bi                   | 0.0025                    | 0.0003      |
| 2/1/2008      | Bi                   | 0.0037                    | 0.0003      |

| Analysis Date | Element <sup>A</sup> | Signal (cps) <sup>B</sup> | Uncertainty |
|---------------|----------------------|---------------------------|-------------|
| 2/1/2008      | Bi                   | 0.0028                    | 0.0003      |
| 2/1/2008      | Bi                   | 0.0034                    | 0.0003      |
| 2/8/2008      | Bi                   | 0.0022                    | 0.0003      |
| 2/8/2008      | Bi                   | 0.0037                    | 0.0003      |
| 2/13/2008     | Bi                   | 0.0028                    | 0.0003      |
| 2/15/2008     | Bi                   | 0.0028                    | 0.0003      |
| 3/2/2008      | Bi                   | 0.0031                    | 0.0003      |
| 4/9/2008      | Bi                   | 0.0028                    | 0.0003      |
| 4/18/2008     | Bi                   | 0.0028                    | 0.0003      |
| 4/18/2008     | Bi                   | 0.0028                    | 0.0003      |
| 6/9/2008      | Bi                   | 0.0031                    | 0.0003      |
| 6/9/2008      | Bi                   | 0.0037                    | 0.0003      |
| 6/10/2008     | Bi                   | 0.0034                    | 0.0003      |
| 6/10/2008     | Bi                   | 0.0037                    | 0.0003      |
| 6/10/2008     | Bi                   | 0.0037                    | 0.0003      |
| 6/11/2008     | Bi                   | 0.0031                    | 0.0003      |
| 6/11/2008     | Bi                   | 0.0034                    | 0.0003      |
| 6/12/2008     | Bi                   | 0.0028                    | 0.0003      |
| 6/12/2008     | Bi                   | 0.0031                    | 0.0003      |
| 6/13/2008     | Bi                   | 0.0031                    | 0.0003      |
| 6/13/2008     | Bi                   | 0.0028                    | 0.0003      |
| 6/17/2008     | Bi                   | 0.0028                    | 0.0003      |
| 6/19/2008     | Bi                   | 0.0037                    | 0.0003      |
| 6/19/2008     | Bi                   | 0.0037                    | 0.0003      |
| 6/20/2008     | Bi                   | 0.0044                    | 0.0003      |
| 7/7/2008      | Bi                   | 0.0047                    | 0.0003      |
| 7/7/2008      | Bi                   | 0.0040                    | 0.0003      |
| 7/7/2008      | Bi                   | 0.0034                    | 0.0003      |
| 7/8/2008      | Bi                   | 0.0040                    | 0.0003      |
| 7/10/2008     | Bi                   | 0.0044                    | 0.0003      |
| 7/10/2008     | Bi                   | 0.0047                    | 0.0003      |
| 7/10/2008     | Bi                   | 0.0037                    | 0.0003      |
| 7/11/2008     | Bi                   | 0.0040                    | 0.0003      |
| 7/13/2008     | Bi                   | 0.0031                    | 0.0003      |
| 7/15/2008     | Bi                   | 0.0037                    | 0.0003      |
| 7/15/2008     | Bi                   | 0.0031                    | 0.0003      |
| 7/30/2008     | Bi                   | 0.0047                    | 0.0003      |
| 10/1/2008     | Bi                   | 0.0034                    | 0.0003      |
| 10/1/2008     | Bi                   | 0.0037                    | 0.0003      |
| 11/14/2008    | Bi                   | 0.0050                    | 0.0016      |
| 1/28/2008     | U                    | 0.0029                    | 0.0008      |
| 2/8/2008      | U                    | 0.0034                    | 0.0008      |
| 6/10/2008     | U                    | 0.0029                    | 0.0008      |
| 6/10/2008     | U                    | 0.0029                    | 0.0008      |
| 6/10/2008     | U                    | 0.0032                    | 0.0008      |
| 6/11/2008     | U                    | 0.0032                    | 0.0008      |
| 6/11/2008     | U                    | 0.0029                    | 0.0008      |
| 6/12/2008     | U                    | 0.0037                    | 0.0008      |
| 6/12/2008     | U                    | 0.0026                    | 0.0008      |
| 6/13/2008     | U                    | 0.0037                    | 0.0008      |

| Analysis Date | Element <sup>A</sup> | Signal (cps) <sup>B</sup> | Uncertainty |
|---------------|----------------------|---------------------------|-------------|
| 6/13/2008     | U                    | 0.0034                    | 0.0008      |
| 6/17/2008     | U                    | 0.0047                    | 0.0008      |
| 6/19/2008     | U                    | 0.0060                    | 0.0008      |
| 6/19/2008     | U                    | 0.0076                    | 0.0008      |
| 6/20/2008     | U                    | 0.0050                    | 0.0008      |
| 7/7/2008      | U                    | 0.0058                    | 0.0008      |
| 7/7/2008      | U                    | 0.0066                    | 0.0008      |
| 7/7/2008      | U                    | 0.0058                    | 0.0008      |
| 7/8/2008      | U                    | 0.0058                    | 0.0008      |
| 7/10/2008     | U                    | 0.0055                    | 0.0008      |
| 7/10/2008     | U                    | 0.0084                    | 0.0008      |
| 7/10/2008     | U                    | 0.0063                    | 0.0008      |
| 7/11/2008     | U                    | 0.0076                    | 0.0008      |
| 7/13/2008     | U                    | 0.0058                    | 0.0008      |
| 7/15/2008     | U                    | 0.0066                    | 0.0008      |
| 7/15/2008     | U                    | 0.0060                    | 0.0008      |
| 7/30/2008     | U                    | 0.0058                    | 0.0008      |
| 10/1/2008     | U                    | 0.0055                    | 0.0008      |
| 10/1/2008     | U                    | 0.0060                    | 0.0008      |
| 11/14/2008    | U                    | 0.0097                    | 0.0026      |

<sup>A</sup>LEAP after an element symbol indicates measurement using the Light Element Analysis Protocol

<sup>B</sup>Interference corrected Compton normalized count rates
